# Supplementary material for: Efficacy of Melflufen in Patients with Relapsed/Refractory Multiple Myeloma and Mutated or Deleted TP53
Source: bioRxiv or medRxiv preprint supplement (doi:10.1101/2024.12.02.24318289), 2024-12-02
Supplement: Supplementary file [file media-1.pdf]

1 **SUPPLEMENTARY MATERIALS FOR:**

2  
3 **Efficacy of Melflufen in Patients with Relapsed/Refractory Multiple Myeloma and**  
4 **Mutated or Deleted *TP53***

5 **SUPPLEMENTARY MATERIALS AND METHODS**

6  
7 **Patient samples**

8 Bone marrow (BM) aspirates (n=24) were collected from 23 multiple myeloma (MM) patients  
9 after informed consent using protocols approved by an ethical committee and in accordance  
10 with the Declaration of Helsinki. BM mononuclear cells (BM-MNCs) were purified by Ficoll  
11 gradient centrifugation and cryopreserved prior to analyses.

12  
13 **Ex vivo drug sensitivity testing with patient cells by flow cytometry**

14 For flow cytometry (FC)-based drug sensitivity testing, viably frozen MM patient BM-MNC were  
15 thawed, freezing solution washed away, cell pellet suspended in conditioned medium (RPMI  
16 1640 medium supplemented with 10% FBS, 2 mM L-glutamine, penicillin (100 U/ml),  
17 streptomycin (100 µg/ml) and 25% conditioned medium from the HS-5 human bone marrow  
18 stromal cell line),<sup>1</sup> DNase I (Promega) treated for 60 min, and cultured in conditioned medium  
19 overnight. Cells were filtered through a 70 µm cell strainer (Fisher Scientific), cell viability  
20 measured and cells plated in parallel on pre-drugged 96-well plates (100,000 viable cells/well  
21 in 100 µl). If cell viability was poor (<50%), the Dead Cell Removal kit (Miltenyi Biotec) was  
22 used prior to plating the cells. Stock solutions (10 000 µM) of melflufen (Oncopeptides AB)  
23 and melphalan (Sigma-Aldrich), that had been prepared in advance and stored at -80 °C, were  
24 thawed and diluted in conditioned medium to desired concentrations shortly before the drug  
25 testing to minimize auto-hydrolysis of melflufen and melphalan (exchange of Cl with OH at the  
26 *N*-mustard part of the molecules). Melflufen and melphalan were added to the 96-well plates  
27 by manually pipetting only after the cells had been plated, just prior to the start of the drug  
28 sensitivity test. The cells were incubated with the drugs for 72 h at 37 °C and 5% CO<sub>2</sub>.

29 Following 72 h incubation with the drugs, cells were centrifuged (500xg, 6 min) in the 96-well  
30 plates and media discarded by inverting the plate. Cells were suspended in 25 µl of antibody  
31 mix containing staining buffer (5% FBS in Dulbecco's phosphate-buffered saline) and the  
32 following two antibodies (BD Biosciences): CD138 (BV605, clone MI15, dilution 1:100) and  
33 CD38 (BV786, clone HIT2, 1:100). Cells were stained for 30 min at room temperature in the  
34 dark and subsequently washed with 100 µl staining buffer followed by centrifugation (500xg,  
35 6 min) and supernatant removal by inverting the plate. Apoptotic and dead cells were  
36 discriminated by 7-aminoactinomycin D (7-AAD) and PE-Annexin V (BD Biosciences) staining  
37 with both dyes diluted 1:50 in 25 µl annexin V binding buffer. The plates were incubated for  
38 10 min at room temperature before FC analysis. FC analysis was performed using the  
39 IntelliCyt iQue Screener PLUS instrument (Sartorius). MM patient sample BM-MNCs were  
40 acquired for analysis from each 96-well plate well by the iQue Screener PLUS instrument  
41 using a 17 s sip time per well and a pump speed of 32 revolutions per minute. ForeCyt software  
42 (Sartorius) was used to gate cells and acquire population counts. Analysis was done from  
43 viable singlet cells. The cell count of a well was normalized to its 6 adjacent DMSO controls,  
44 from which the highest and lowest value were excluded and normalized values were used for  
45 calculating cell viability percentages for each tested drug concentration, and dose response  
46 curves drawn. Drug sensitivity score (DSS) values were calculated based on the dose-  
47 response curves.<sup>2</sup>

48

#### 49 **Single-cell gene expression analysis**

50 For single cell RNA sequence (scRNAseq) analysis, the MM patient BM-MNCs were sorted  
51 based on cell viability (7-AAD, BD Biosciences) and CD138<sup>+</sup> surface expression (APC, clone  
52 MI15, BD Biosciences) using fluorescence-activated cell sorting (BD Influx Cell Sorter, BD  
53 Biosciences). CD138<sup>+</sup> and CD138<sup>-</sup> sorted cell fractions were mixed at a 1:1 ratio with a  
54 maximum of 800,000 cells per sample. If there were fewer than 400,000 CD138<sup>+</sup> cells, then  
55 all CD138<sup>+</sup> cells were mixed with 400,000 CD138<sup>-</sup> cells. scRNAseq library preparation was  
56 performed on the mixed CD138<sup>+</sup> and CD138<sup>+</sup> cell samples using the Chromium Single Cell

57 3' Gene Expression v3 reagent kit (10x Genomics). The gel beads in emulsion (GEM)  
58 generation, cDNA amplification and library preparation were performed according to the  
59 manufacturer's instructions. The prepared libraries were then sequenced on the Illumina  
60 NovaSeq 6000 instrument (Illumina) with paired-end reads 28 bp and 89 bp.

61 Analysis of scRNA-seq data was performed in R Studio environment, using Seurat  
62 package (version 4.0.1).<sup>3</sup> Upon data uploading, quality control of cells was done. We used  
63 percentage of mitochondrial genes (< triple median or 30%, whichever is less), number of  
64 unique genes (>500), number of transcripts (< triple median), and log<sub>10</sub> transformed ratio of  
65 number of transcripts to number of unique genes (>0.8) to remove dead and late apoptotic  
66 cells, as well as multiplets from the subsequent analysis. Samples were integrated, using  
67 anchoring procedure, normalized and variance stabilized, and clustered, based on  
68 construction of a Shared Nearest Neighbour Graph, which utilized dataset with dimensions  
69 reduced by the prior principal component analysis. Clusters were identified, based on the gene  
70 expression patterns, and divided into plasma cells (CD138+ pre-sorted fraction) and cells of  
71 other types (CD138- pre-sorted fraction) for further analysis. After the division of the initial  
72 dataset, new ones were re-integrated, normalized, and clustered. Additionally, for plasma cells  
73 dataset, we filtered out immunoglobulin genes. Final clustering results were checked for the  
74 distribution of cells, based on cell cycle phase and mitochondrial content, and annotated, using  
75 the genes expressed differently between the given and all the other clusters.

76 For the analysis of differentially expressed genes (DGE), we sequentially compared  
77 HS vs IS, IS vs LS, and HS vs LS samples, filtering out non-monotonous changes in gene  
78 expression between those groups, and using the threshold of 0.2 for log<sub>2</sub>-transformed fold  
79 change values. The identification of DGE was done by the means of MAST framework.<sup>4</sup>

80 For the gene set enrichment analysis, clusterProfiler (v.3.18.1)<sup>5</sup> and ReactomePA (v.  
81 1.34.0)<sup>6</sup> packages were used. We utilized Reactome<sup>7</sup>, KEGG<sup>8</sup> and MSigDB<sup>9,10</sup> datasets.  
82 Differentially expressed genes from melflufen comparison, with preliminary subtracted genes  
83 from DGE analysis for melphalan, and retained genes altered due to the disease stage, were

84 used as an input to cluster genes, based on their belonging to the gene sets, respectively to  
85 their functions, regulation, or expression patterns.

86

### 87 **Cell lines, cell culture and cytotoxicity**

88 The AMO-1 cell line was obtained from DSMZ (Braunschweig, Germany). Generation and  
89 characterization of *TP53* deficient AMO-1 clones is described in Munawar et al., 2019.<sup>11</sup>

90 Standard cell culture was performed in RPMI-1640 medium supplemented with 10% fetal  
91 bovine serum (FBS), 1 mM sodium pyruvate, 2 mM glutamine, 100 U/ml penicillin, and 100  
92 µg/ml streptomycin. Cells were kept at 5% CO<sub>2</sub> and 37 °C. Cells were cultured on 96well plates  
93 in 200 µl culture medium for 72 h exposure period before measuring the number of viable  
94 cells. Cell viability was determined using the AlamarBlue™ reagent (Invitrogen) or cell death  
95 assays (annexin V/propidiumiodide) according to the manufacturers' protocols.

96

### 97 **Compounds and stock solutions**

98 Melflufen (Oncopeptides AB) was freshly prepared in DMSO before application. Melphalan  
99 (Sigma-Aldrich, M2011) stock solution was prepared in acidified ethanol. Cyclophosphamide  
100 (N,N-bis(2-chloroethyl)-4-hydroperoxy-2-oxo-1,3,25-oxazaphosphinan-2-amine,TRC  
101 (product number TRC-H714675) was freshly prepared in DMSO.

102

### 103 **RNA preparation and RNA-seq analysis**

104 AMO1 *TP53* wild type cells or the *TP53*<sup>-/-</sup> knock out clonal subline AMO-1 *TP53*<sup>-/-</sup> were treated  
105 with melphalan or melflufen at different concentrations and timepoints. RNA was isolated  
106 according to the RNeasy plus protocol, quantified with Nanodrop (Thermo Scientific), and  
107 quality assessed with the Agilent 2100 Bioanalyzer. DNA libraries were prepared using the  
108 TruSeq Stranded mRNA Library Preparation Kit (Illumina) and sequencing performed on the  
109 NextSeq 500 platform (Illumina). Base calling was performed by Real-Time Analysis (RTA)  
110 version 2.4.11 or 2.11.3 and demultiplexed FASTQ files were generated with bcl2fastq2

111 v2.20.0.422 (Illumina). To assure high sequence quality, Illumina reads were quality- and adapter-  
112 trimmed via Cutadapt<sup>12,13</sup> version 2.5 using a cutoff Phred score of 20 in NextSeq mode and reads  
113 without any remaining bases were discarded (command line parameters: --nextseq-trim=20 -m 1  
114 -a AGATCGGAAGAGCACACGTCTGAACTCCAGTCAC). Processed reads were subsequently  
115 mapped to the human genome (GRCh38.p14) using STAR v2.7.2b with default parameters based  
116 on RefSeq annotation version 110 for GRCh38.p14.<sup>14</sup> Read counts on exon level summarized for  
117 each gene were generated using featureCounts v1.6.4 from the Subread package.<sup>15</sup> Multi-  
118 mapping and multi-overlapping reads were counted strand-specific and reversely stranded with a  
119 fractional count for each alignment and overlapping feature (command line parameters: -s 2 -t exon  
120 -M -O --fraction). The count output was utilized to identify differentially expressed genes using  
121 DESeq2<sup>15</sup> version 1.24.0. Read counts were normalized by DESeq2 and fold-change shrinkage  
122 was applied by setting the parameter "betaPrior=TRUE". Differential expression of genes was  
123 assumed at an adjusted p-value (padj) after Benjamini-Hochberg correction  $< 0.05$  and  
124  $|\log_2\text{FoldChange}| \geq 0.5$ . clusterProfiler version 3.12.0 was used to perform functional enrichment  
125 analyses based on Kyoto Encyclopedia of Genes and Genomes (KEGG) pathways and Gene  
126 Ontology (GO) terms.<sup>5</sup> The *enricher* function was used to perform hypergeometric tests based on  
127 lists of significant genes and the *GSEA* function was applied for gene set enrichment analysis  
128 considering the DESeq2 log2FoldChange of all analyzed genes. R was applied to generate  
129 heatmaps.

130

### 131 **DNA damage signaling and cell apoptosis analyses**

132 AMO-1 *TP53* wild type and AMO-1 *TP53*<sup>-/-</sup> cells were treated with melflufen, melphalan or  
133 cyclophosphamide at the indicated concentrations and time points. H2AX phosphorylation at  
134 Ser139 ( $\gamma$ -H2AX) for DNA damage signal was analyzed using flow cytometry. The following  
135 protocol was applied for  *$\gamma$ -H2AX staining*; Cells were fixed in Flow Cytometry Fixation Buffer  
136 (R&D Systems) and stored in 70% ethanol at -20°C overnight. Prior to incubation with Alexa  
137 Fluor 488-conjugated phosphorylated H2AX antibody (Sigma-Aldrich) or Mouse IgG1 (R&D  
138 Systems), cells were blocked with Human Seroblock (Bio-Rad Laboratories).

139 For apoptosis analysis cells were stained for annexin V-APC and PI (Invitrogen) as follows;  
140 cells were suspended in staining mix containing Annexin V APC (Invitrogen) and PI  
141 (Invitrogen), fixed in Flow Cytometry Fixation Buffer and resuspended in annexin V binding  
142 buffer (Invitrogen).

143 All samples were analyzed with the FACSCanto II flow cytometer (BD Biosciences). Data  
144 were analyzed using FlowJo software (BD Biosciences).

145

#### 146 **JC-1 mitochondria membrane potential assay**

147 AMO-1 *TP53* wild type and AMO-1 *TP53*<sup>-/-</sup> cells at 1x10<sup>5</sup>/mL were treated with melflufen,  
148 melphalan or cyclophosphamide at the indicated concentrations and cells were harvested  
149 after 2h or 4h. The JC-1 mitochondrial membrane potential assay was performed according  
150 to the manufacturers protocol (MitoProbe™ JC-1 Assay Kit for Flow Cytometry (M34152),  
151 Molecular Probes, Eugene, OR). Following drug treatment, the cells were stained with JC-1  
152 (5,5',6,6'-tetrachloro-1,1',3,3'-tetra-ethyl-benzimidazolyl-carbocyanine iodide) reagent for 15  
153 min at 37 °C, pelleted by centrifugation (4 min/250xg), washed with PBS and resuspended in  
154 PBS. The ratio of green to red fluorescence was determined with a Spectra Max i3X (Molecular  
155 Devices) plate reader. Data was generated with 488 nm excitation and using 529 nm and 590  
156 nm emission filters. Obtained measurement data was analyzed to calculate the mitochondria  
157 membrane potential changes upon drug treatment.

158

#### 159 **Statistical analyses of the OCEAN trial data**

160 Primary analysis of tumor response and progression-dependent endpoints of patients enrolled  
161 in the OCEAN trial (NCT03151811) were based on response assessments by an Independent  
162 Review Committee. All tumor response and progression-dependent endpoints were assessed  
163 using the IMWG Uniform Response Criteria (IMWG-URC). The overall response rate (ORR)  
164 was defined as the proportion of patients for whom the best overall confirmed response was  
165 stringent complete response (sCR), complete response (CR), very good partial response

166 (VGPR), or partial response (PR). Post-hoc analyses were performed to examine associations  
167 between progression-free survival (PFS) and chromosome 17 deletion status and/or *TP53*  
168 gene mutation status. Furthermore, another post-hoc analysis was carried out to study the  
169 patient responder status in the chromosome 17 deletion population.

170

#### 171 **Assessment of *TP53* mutation status of OCEAN trial patients**

172 *TP53* mutation status of OCEAN trial patients was determined by next generation sequencing  
173 (NGS) using Almac Genomic Services. In brief, Almac's NGS v2 *TP53* Assay has been  
174 performed what detects germline and somatic single nucleotide variants (SNV), small insertion  
175 and small deletion events within the promoter region, the coding and non-coding regions of  
176 exons one to ten, a portion of exon eleven, and the intron-exon boundaries of *TP53* isoform a  
177 (NM\_000546) using the Illumina MiSeq platform. Sample preparation for the sequencing has  
178 been performed as followed; from patients, whom consented, bone marrow aspirates CD138+  
179 purified plasma cells had been frozen shipped to Almac Genomic Services. From CD138+  
180 cells, DNA was extracted using QIAamp® DNA Blood Midi Kit (QIAGEN©), DNA quality was  
181 checked according to Almac's Qubit quality control. NGS v2 *TP53* assay was performed using  
182 the TruSeq Custom Amplicon Kit Dx and custom *TP53* oligo panel. Analysis was performed  
183 as follows: sequencing, demultiplexing, FASTQ file generation, sequence alignment and  
184 variant calling was automatically performed onboard the MiSeq system. Sequencing run,  
185 sample and control QC was performed using the Almac Genomic Services developed  
186 software, named Almac *TP53* CTA v2 Analysis. All detected SNVs were classified and aligned  
187 with the National Library of Medicine, NIH database, for ClinVar genomic variation database  
188 and clinical relevance to classify mutation type into benign or pathogenic.

189 **SUPPLEMENTARY REFERENCES**

190

191 1. Roecklein BA, Torok-Storb B. Functionally distinct human marrow stromal cell lines  
192 immortalized by transduction with the human papilloma virus E6/E7 genes. *Blood*.  
193 1995;85(4):997-1005.

194 2. Yadav B, Pemovska T, Szwajda A, et al. Quantitative scoring of differential drug  
195 sensitivity for individually optimized anticancer therapies. *Scientific reports*.  
196 2014;4:5193.

197 3. Hao Y, Hao S, Andersen-Nissen E, et al. Integrated analysis of multimodal single-cell  
198 data. *Cell*. 2021;184(13):3573-3587 e3529.

199 4. Finak G, McDavid A, Yajima M, et al. MAST: a flexible statistical framework for  
200 assessing transcriptional changes and characterizing heterogeneity in single-cell  
201 RNA sequencing data. *Genome Biol*. 2015;16:278.

202 5. Yu G, Wang LG, Han Y, He QY. clusterProfiler: an R package for comparing  
203 biological themes among gene clusters. *OMICS*. 2012;16(5):284-287.

204 6. Yu G, He QY. ReactomePA: an R/Bioconductor package for reactome pathway  
205 analysis and visualization. *Mol Biosyst*. 2016;12(2):477-479.

206 7. Jassal B, Matthews L, Viteri G, et al. The reactome pathway knowledgebase. *Nucleic  
207 Acids Res*. 2020;48(D1):D498-D503.

208 8. Kanehisa M, Goto S. KEGG: kyoto encyclopedia of genes and genomes. *Nucleic  
209 Acids Res*. 2000;28(1):27-30.

210 9. Liberzon A, Subramanian A, Pinchback R, Thorvaldsdottir H, Tamayo P, Mesirov JP.  
211 Molecular signatures database (MSigDB) 3.0. *Bioinformatics*. 2011;27(12):1739-  
212 1740.

213 10. Subramanian A, Tamayo P, Mootha VK, et al. Gene set enrichment analysis: a  
214 knowledge-based approach for interpreting genome-wide expression profiles. *Proc  
215 Natl Acad Sci U S A*. 2005;102(43):15545-15550.



- 216 11. Munawar U, Roth M, Barrio S, et al. Assessment of TP53 lesions for p53 system  
217 functionality and drug resistance in multiple myeloma using an isogenic cell line  
218 model. *Sci Rep.* 2019;9(1):18062.
- 219 12. Dobin A, Davis CA, Schlesinger F, et al. STAR: ultrafast universal RNA-seq aligner.  
220 *Bioinformatics.* 2013;29(1):15-21.
- 221 13. Martin M. Cutadapt removes adapter sequences from high-throughput sequencing  
222 reads. 2011;17(3):10-12.
- 223 14. Liao Y, Smyth GK, Shi W. featureCounts: an efficient general purpose program for  
224 assigning sequence reads to genomic features. *Bioinformatics.* 2014;30(7):923-930.
- 225 15. Love MI, Huber W, Anders S. Moderated estimation of fold change and dispersion for  
226 RNA-seq data with DESeq2. *Genome Biol.* 2014;15(12):550.  
227

## Supplementary Figure Legends

**Supplementary Figure 1. GSEA results of *TP53*mut vs *TP53*wt cells in cell lines and patient samples.** Bar plots, representing normalized enrichment score for top 20 deregulated gene sets, consisting of the most deregulated genes between *TP53* mutated and *TP53*wt cell lines (A), patient samples (B), and commonly deregulated genes (C) in both tested models.

**Supplementary Figure 2. Gene expression analysis in *TP53*wt versus *TP53*<sup>-/-</sup> genetic background AMO-1 cells.** Functional and signalling pathways gene expression heat maps after 2h and 12h treatment with melflufen or melphalan at their IC90 values in *TP53*wt or *TP53*<sup>-/-</sup> AMO-1 cells.

**Supplementary Table 1. Differentially expressed genes between *TP53*wt and *TP53*mut cohorts of patient samples.**

**Supplementary Table 2. Differentially expressed genes between *TP53*wt and *TP53*<sup>-/-</sup> cell line models.**

**Supplementary Table 3. Commonly deregulated differentially expressed genes between *TP53*wt and *TP53*mut cohorts of patient samples and cell line models.**

**Supplementary Table 4. Melflufen and melphalan EC50 and EC90 values in the AMO-1 isogenic wild type (*TP53*wt) or mutant (*TP53*<sup>-/-</sup>) cell lines.** Cell lines were treated with either melflufen or melphalan at 8-point drug concentration range to determine EC50 or EC90 values using viability assay.

**Supplementary Table 5. Patients baseline demographic and diseases characteristics in del(17p) patient subpopulation from the OCEAN trial.**

**Supplementary Table 6. Cytogenetics data of del(17p) subpopulation from the OCEAN trial.**

**Supplementary Table 7. Patients baseline demographic and diseases characteristics in del(17p) and/or *TP53* gene mutated patient subpopulation from the OCEAN trial.**

# Supplementary Figure S1

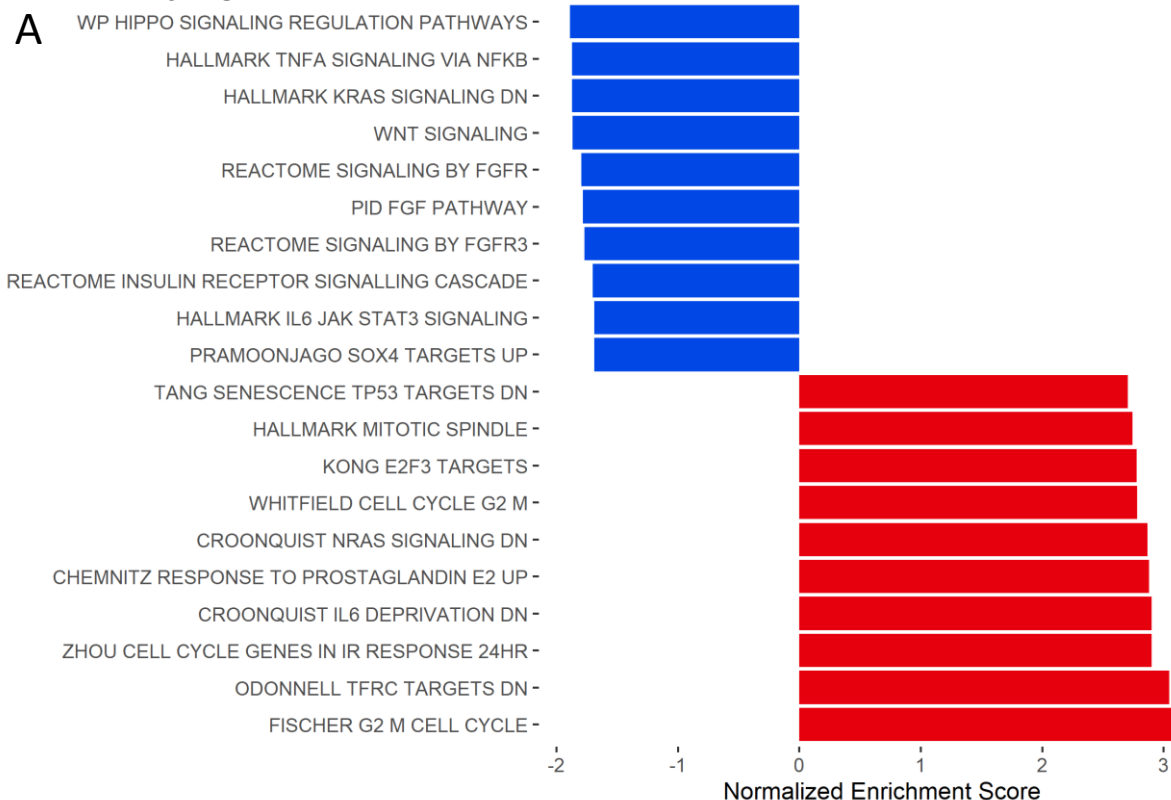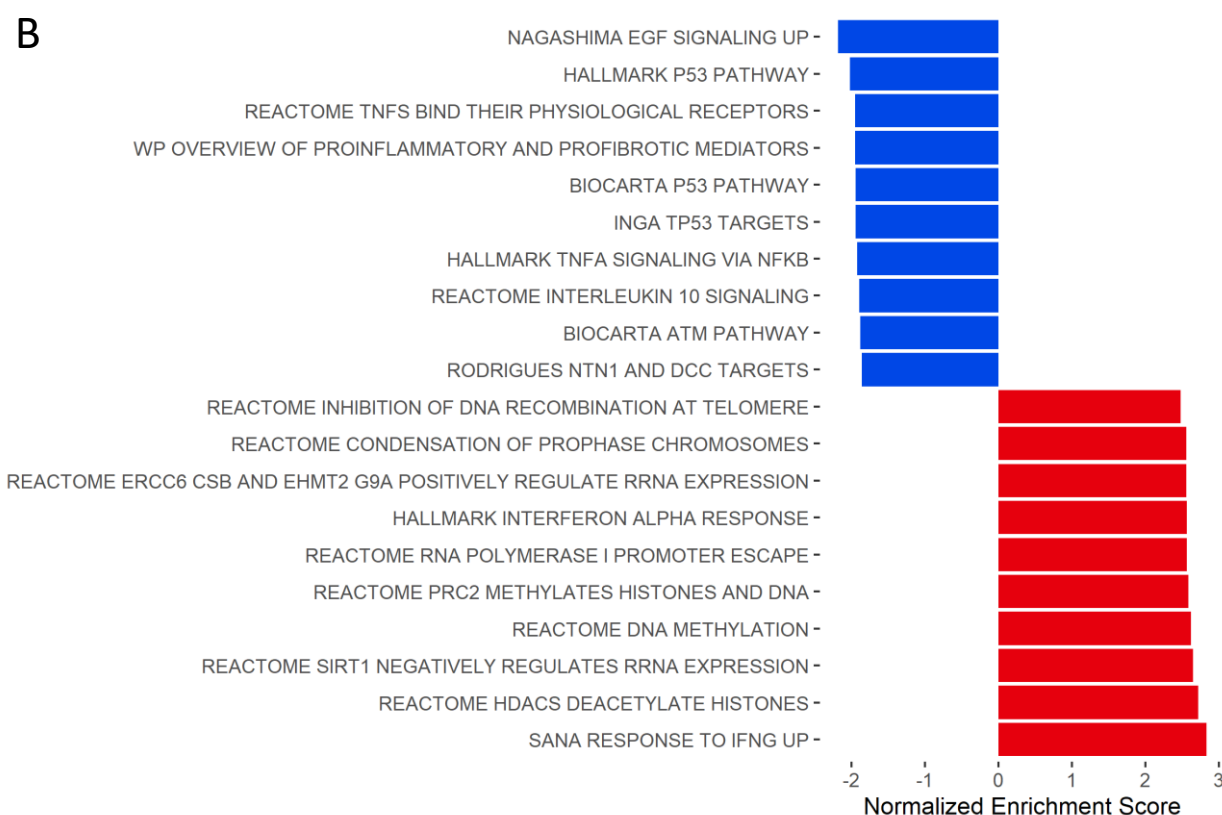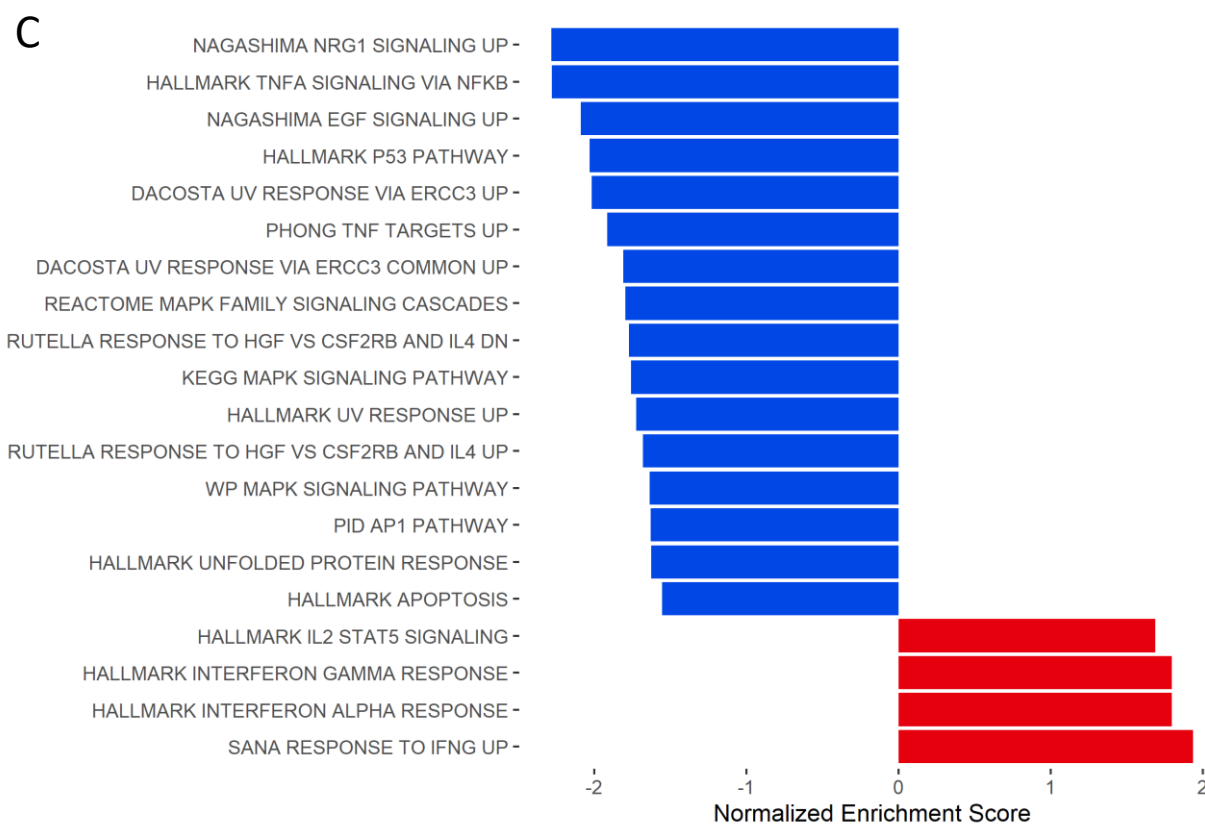

Supplementary Figure S2  
p53 signalling pathway

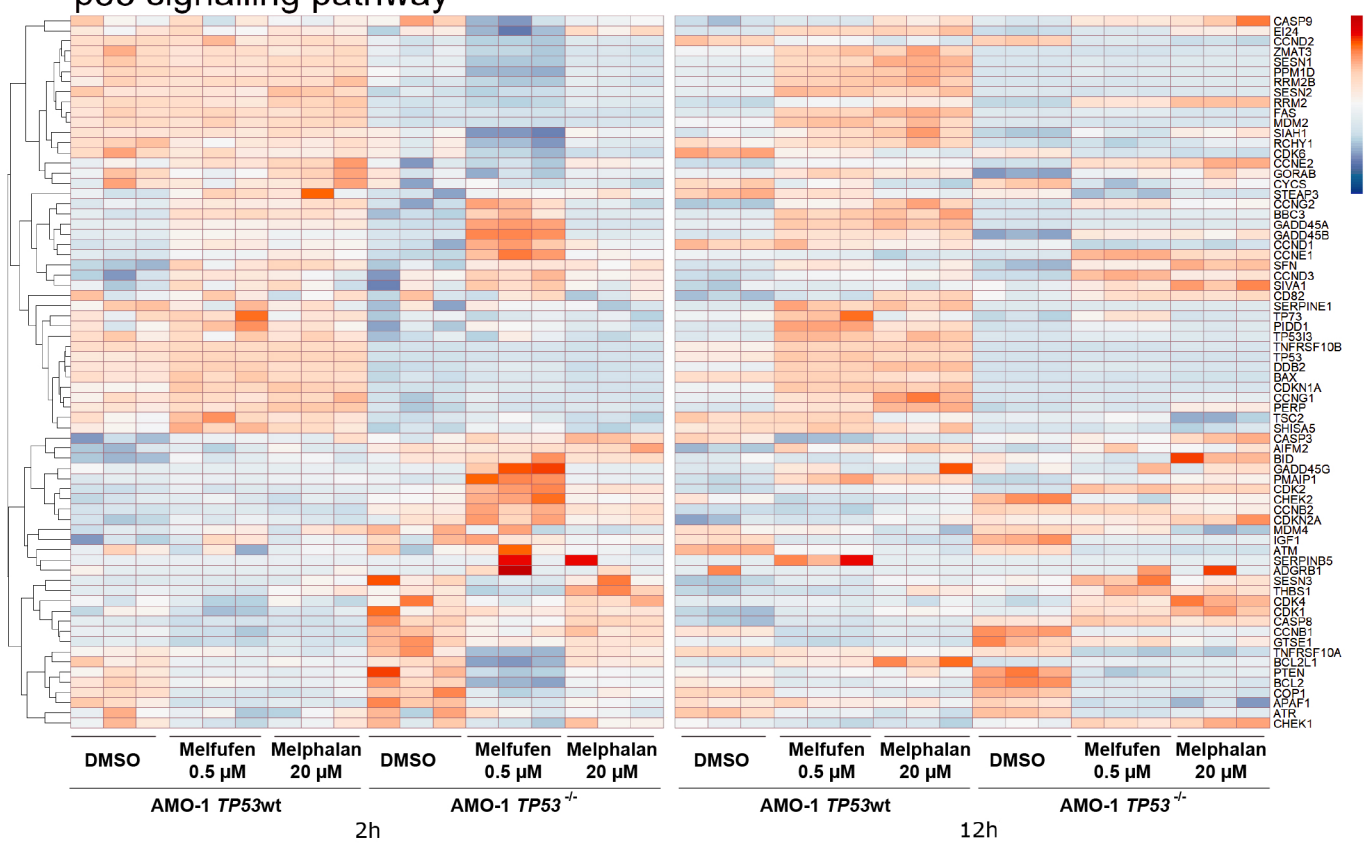

DNA replication

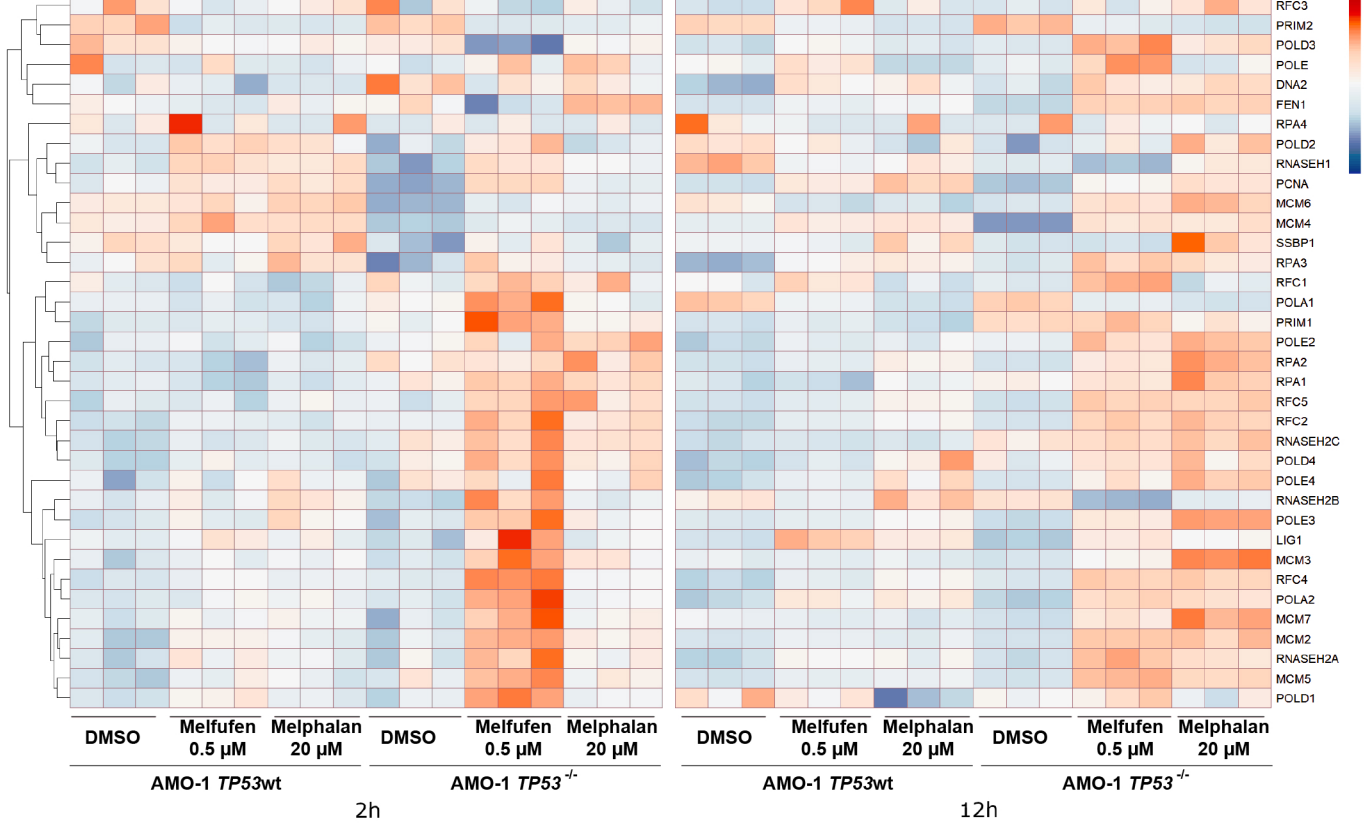

Nucleotide excision repair

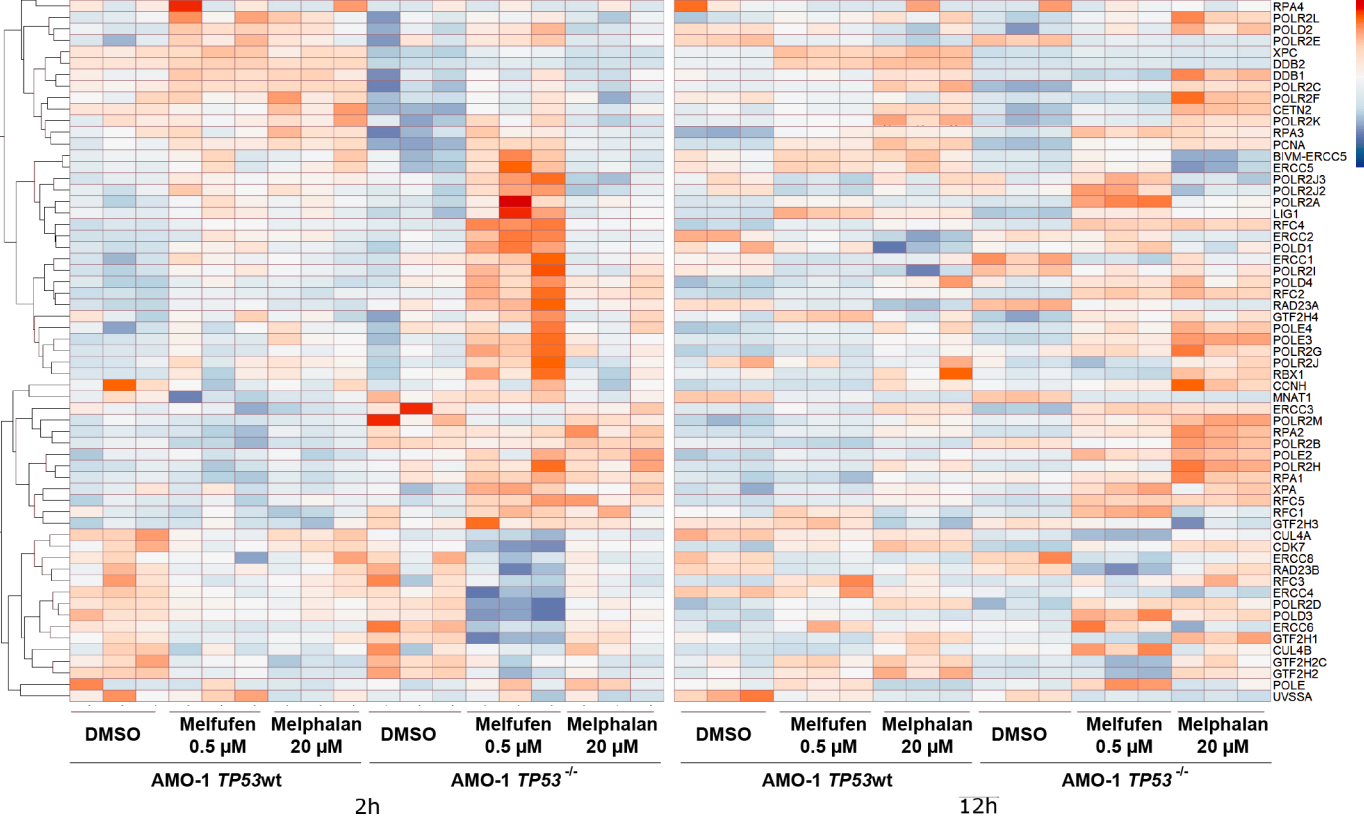

Base excision repair

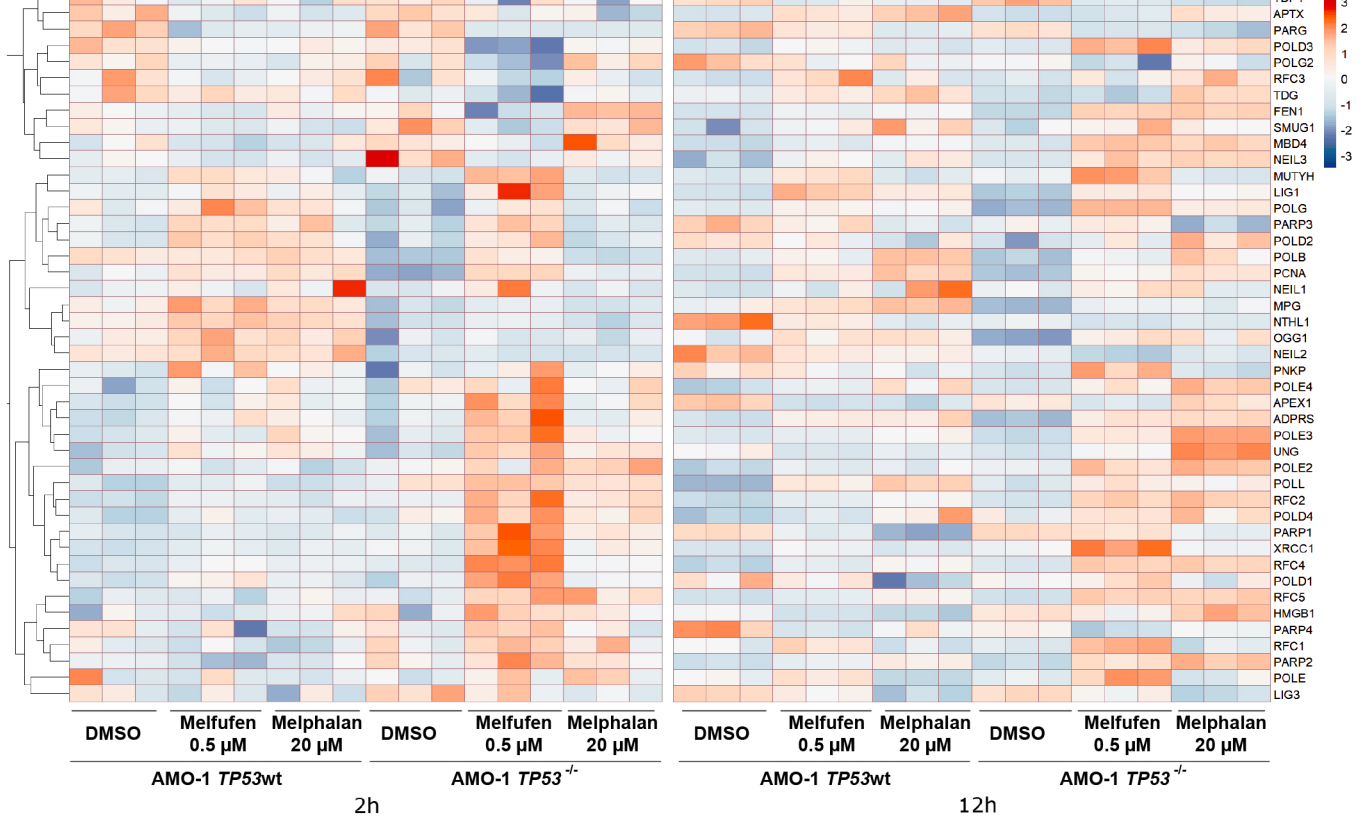

## Supplementary Table S1

|         | p_val | avg_log2FC     | pct.1 | pct.2 | p_val_adj |   |
|---------|-------|----------------|-------|-------|-----------|---|
| PDLIM1  |       | 0 3.664687853  | 0.681 | 0.117 |           | 0 |
| C2orf76 |       | 0 3.420471839  | 0.583 | 0.091 |           | 0 |
| TEX9    |       | 0 2.286099642  | 0.715 | 0.235 |           | 0 |
| TMSB4X  |       | 0 0.90976914   | 0.97  | 0.511 |           | 0 |
| SNRPA1  |       | 0 2.156806557  | 0.678 | 0.23  |           | 0 |
| CCT5    |       | 0 2.684253142  | 0.792 | 0.345 |           | 0 |
| TIMP1   |       | 0 -1.743381244 | 0.116 | 0.55  |           | 0 |
| CTSC    |       | 0 1.843922557  | 0.617 | 0.194 |           | 0 |
| ADAM28  |       | 0 2.202429331  | 0.436 | 0.056 |           | 0 |
| LSM6    |       | 0 1.682444727  | 0.657 | 0.277 |           | 0 |
| AREG    |       | 0 -3.813613138 | 0.06  | 0.438 |           | 0 |
| ACADM   |       | 0 1.785230408  | 0.578 | 0.2   |           | 0 |
| PTTG1   |       | 0 2.500333653  | 0.448 | 0.074 |           | 0 |
| CKLF    |       | 0 1.349794982  | 0.692 | 0.323 |           | 0 |
| IFT57   |       | 0 1.490791577  | 0.707 | 0.344 |           | 0 |
| MRPL16  |       | 0 1.654690202  | 0.563 | 0.2   |           | 0 |
| MRPL3   |       | 0 1.513319351  | 0.67  | 0.309 |           | 0 |
| PSMG1   |       | 0 2.247866535  | 0.492 | 0.131 |           | 0 |
| COPS5   |       | 0 1.46056881   | 0.653 | 0.294 |           | 0 |
| SDHAF3  |       | 0 1.905224517  | 0.469 | 0.11  |           | 0 |
| CCT2    |       | 0 1.379970259  | 0.69  | 0.336 |           | 0 |
| PSMA1   |       | 0 1.563550789  | 0.784 | 0.431 |           | 0 |
| MRPL36  |       | 0 1.842694291  | 0.586 | 0.233 |           | 0 |
| PSMA2   |       | 0 1.403057147  | 0.752 | 0.4   |           | 0 |
| GAS2    |       | 0 1.797866305  | 0.493 | 0.142 |           | 0 |
| MRPL13  |       | 0 1.593190446  | 0.573 | 0.223 |           | 0 |
| STMP1   |       | 0 1.557474358  | 0.566 | 0.217 |           | 0 |
| ANXA5   |       | 0 1.465860868  | 0.783 | 0.435 |           | 0 |
| APOL3   |       | 0 3.309008404  | 0.363 | 0.017 |           | 0 |
| SPOCK2  |       | 0 3.31339059   | 0.367 | 0.022 |           | 0 |
| FAM30A  |       | 0 0.788409479  | 0.59  | 0.246 |           | 0 |
| CCDC34  |       | 0 2.532285529  | 0.421 | 0.078 |           | 0 |
| HDDC2   |       | 0 1.394602557  | 0.602 | 0.259 |           | 0 |
| GLRX    |       | 0 0.63081179   | 0.743 | 0.401 |           | 0 |
| TCF4    |       | 0 0.381815775  | 0.778 | 0.439 |           | 0 |
| OLA1    |       | 0 1.364450273  | 0.6   | 0.262 |           | 0 |
| LPIN1   |       | 0 1.009935629  | 0.523 | 0.188 |           | 0 |
| NIT2    |       | 0 1.622802067  | 0.525 | 0.19  |           | 0 |
| SSB     |       | 0 1.295647837  | 0.73  | 0.397 |           | 0 |
| PSMD14  |       | 0 1.215588037  | 0.598 | 0.267 |           | 0 |
| MPC2    |       | 0 1.654053609  | 0.749 | 0.42  |           | 0 |
| THOC7   |       | 0 1.210747362  | 0.696 | 0.367 |           | 0 |
| RHOBTB3 |       | 0 2.31633227   | 0.414 | 0.086 |           | 0 |
| THYN1   |       | 0 1.372417273  | 0.534 | 0.211 |           | 0 |
| GTF3C6  |       | 0 1.250404124  | 0.623 | 0.3   |           | 0 |
| MRPL21  |       | 0 1.303532592  | 0.574 | 0.251 |           | 0 |
| OTUD1   |       | 0 -2.44605744  | 0.274 | 0.595 |           | 0 |
| DECR1   |       | 0 1.054851728  | 0.686 | 0.367 |           | 0 |
| BUB3    |       | 0 1.18576582   | 0.623 | 0.305 |           | 0 |

|          |   |              |       |       |   |
|----------|---|--------------|-------|-------|---|
| SNRPF    | 0 | 1.202622728  | 0.708 | 0.39  | 0 |
| PSMD13   | 0 | 1.1514223    | 0.664 | 0.35  | 0 |
| ELOC     | 0 | 0.970902058  | 0.692 | 0.381 | 0 |
| ATP5F1C  | 0 | 1.226032061  | 0.756 | 0.446 | 0 |
| ANXA2    | 0 | 0.676031905  | 0.714 | 0.405 | 0 |
| NDUFB6   | 0 | 0.932838533  | 0.668 | 0.361 | 0 |
| METTL5   | 0 | 0.98402097   | 0.641 | 0.334 | 0 |
| PMPCB    | 0 | 1.114328174  | 0.573 | 0.267 | 0 |
| GTF2A2   | 0 | 1.0028673    | 0.683 | 0.379 | 0 |
| UTP3     | 0 | 1.503341195  | 0.508 | 0.206 | 0 |
| PSMB2    | 0 | 1.042296855  | 0.686 | 0.386 | 0 |
| HNRNPR   | 0 | 0.984679112  | 0.732 | 0.432 | 0 |
| SRP72    | 0 | 1.41385347   | 0.832 | 0.533 | 0 |
| GLRX3    | 0 | 1.38538194   | 0.48  | 0.184 | 0 |
| PSMA5    | 0 | 1.05021204   | 0.683 | 0.39  | 0 |
| UBE2N    | 0 | 1.006253542  | 0.52  | 0.227 | 0 |
| PSMA4    | 0 | 0.884032593  | 0.751 | 0.458 | 0 |
| RAN      | 0 | 1.38593788   | 0.831 | 0.538 | 0 |
| ATP6V1A  | 0 | 1.51589263   | 0.421 | 0.129 | 0 |
| ZNF791   | 0 | 0.85764303   | 0.774 | 0.483 | 0 |
| VDAC3    | 0 | 1.224637695  | 0.568 | 0.277 | 0 |
| CBX3     | 0 | 1.081237502  | 0.726 | 0.436 | 0 |
| HSD17B10 | 0 | 0.987361002  | 0.605 | 0.316 | 0 |
| MRPL42   | 0 | 0.870777225  | 0.565 | 0.276 | 0 |
| NDUFA12  | 0 | 0.956450717  | 0.694 | 0.407 | 0 |
| RBX1     | 0 | 0.924528882  | 0.697 | 0.41  | 0 |
| CCT8     | 0 | 0.970724725  | 0.762 | 0.476 | 0 |
| MINOS1   | 0 | 0.958039869  | 0.722 | 0.437 | 0 |
| MACF1    | 0 | 0.750819688  | 0.59  | 0.306 | 0 |
| SEC11A   | 0 | 1.215686599  | 0.822 | 0.538 | 0 |
| IL6R     | 0 | -2.223770292 | 0.087 | 0.37  | 0 |
| SF3B5    | 0 | 0.961625156  | 0.807 | 0.524 | 0 |
| COA4     | 0 | 0.89016747   | 0.614 | 0.332 | 0 |
| G3BP1    | 0 | 0.931977622  | 0.597 | 0.315 | 0 |
| LSM3     | 0 | 1.169657544  | 0.717 | 0.435 | 0 |
| EIF4G2   | 0 | 1.084394557  | 0.837 | 0.555 | 0 |
| TOMM22   | 0 | 0.861471114  | 0.645 | 0.364 | 0 |
| VPS29    | 0 | 0.872379523  | 0.619 | 0.338 | 0 |
| PFDN2    | 0 | 0.834537105  | 0.652 | 0.372 | 0 |
| DCAF13   | 0 | 1.076419382  | 0.5   | 0.221 | 0 |
| HCLS1    | 0 | 0.829974636  | 0.677 | 0.398 | 0 |
| PRPF40A  | 0 | 0.845869429  | 0.681 | 0.403 | 0 |
| MRPL22   | 0 | 0.97644171   | 0.559 | 0.282 | 0 |
| PSMB7    | 0 | 0.823471266  | 0.703 | 0.427 | 0 |
| ENY2     | 0 | 0.649801371  | 0.761 | 0.49  | 0 |
| PPHLN1   | 0 | 0.773548088  | 0.641 | 0.37  | 0 |
| PRDX3    | 0 | 0.93832879   | 0.567 | 0.297 | 0 |
| ARPC3    | 0 | 1.064958717  | 0.848 | 0.579 | 0 |
| ATP6V1F  | 0 | 0.867465927  | 0.659 | 0.39  | 0 |
| PDHB     | 0 | 1.01645015   | 0.507 | 0.238 | 0 |

|          |   |              |       |       |   |
|----------|---|--------------|-------|-------|---|
| CRNDE    | 0 | 1.420347084  | 0.416 | 0.148 | 0 |
| HSPE1    | 0 | 0.834593454  | 0.812 | 0.545 | 0 |
| SRP9     | 0 | 0.716154404  | 0.708 | 0.441 | 0 |
| EID1     | 0 | 1.339332374  | 0.835 | 0.569 | 0 |
| JPT1     | 0 | 1.527763733  | 0.383 | 0.117 | 0 |
| MRPL32   | 0 | 0.856546289  | 0.588 | 0.322 | 0 |
| POMP     | 0 | 0.76886582   | 0.698 | 0.433 | 0 |
| FRG1     | 0 | 0.823408354  | 0.572 | 0.308 | 0 |
| CISD1    | 0 | 0.892524441  | 0.508 | 0.246 | 0 |
| EIF2S2   | 0 | 0.555351976  | 0.762 | 0.501 | 0 |
| ITGB3BP  | 0 | 1.162445862  | 0.386 | 0.125 | 0 |
| NUDT5    | 0 | 0.925290381  | 0.524 | 0.264 | 0 |
| NKAPD1   | 0 | 1.378014218  | 0.387 | 0.128 | 0 |
| NUDT21   | 0 | 1.140671716  | 0.47  | 0.212 | 0 |
| SOD1     | 0 | 0.612248875  | 0.758 | 0.5   | 0 |
| PSMD7    | 0 | 0.701598921  | 0.687 | 0.43  | 0 |
| CMC2     | 0 | 1.174191778  | 0.433 | 0.176 | 0 |
| KLF2     | 0 | -2.631480419 | 0.626 | 0.883 | 0 |
| PTPN1    | 0 | -2.318727925 | 0.053 | 0.31  | 0 |
| SAMD9L   | 0 | 0.718269431  | 0.475 | 0.22  | 0 |
| SDHB     | 0 | 0.987982169  | 0.523 | 0.268 | 0 |
| NDUFB3   | 0 | 0.571046993  | 0.736 | 0.483 | 0 |
| CEBPB    | 0 | -1.346547891 | 0.157 | 0.409 | 0 |
| PSMB5    | 0 | 0.740236937  | 0.609 | 0.357 | 0 |
| AHNAK    | 0 | -1.079306698 | 0.237 | 0.488 | 0 |
| CDC123   | 0 | 1.203378247  | 0.43  | 0.179 | 0 |
| PSMA7    | 0 | 0.776689293  | 0.82  | 0.569 | 0 |
| TXN      | 0 | 1.799974964  | 0.885 | 0.635 | 0 |
| SDHD     | 0 | 0.84881851   | 0.552 | 0.303 | 0 |
| ANP32A   | 0 | 0.80148512   | 0.607 | 0.358 | 0 |
| ANXA6    | 0 | 0.764570228  | 0.525 | 0.276 | 0 |
| LEO1     | 0 | 1.460147888  | 0.359 | 0.11  | 0 |
| MLKL     | 0 | 1.561079169  | 0.338 | 0.09  | 0 |
| BCCIP    | 0 | 1.126951643  | 0.425 | 0.177 | 0 |
| ELL2     | 0 | 0.524548059  | 0.822 | 0.574 | 0 |
| APLP2    | 0 | 1.462768014  | 0.431 | 0.184 | 0 |
| PRDX6    | 0 | 0.674852293  | 0.712 | 0.465 | 0 |
| CFAP298  | 0 | 0.988893075  | 0.436 | 0.19  | 0 |
| TRIAP1   | 0 | 1.126280277  | 0.418 | 0.172 | 0 |
| XIST     | 0 | -13.95297672 | 0     | 0.246 | 0 |
| S100A10  | 0 | 0.48841121   | 0.649 | 0.404 | 0 |
| TENT5C   | 0 | -1.662438698 | 0.451 | 0.695 | 0 |
| MRPL18   | 0 | 0.927109251  | 0.487 | 0.244 | 0 |
| SUMO1    | 0 | 0.661717428  | 0.617 | 0.374 | 0 |
| OSTC     | 0 | 0.67029785   | 0.805 | 0.564 | 0 |
| SNRPD2   | 0 | 1.160330683  | 0.865 | 0.624 | 0 |
| CD47     | 0 | 0.529481375  | 0.664 | 0.425 | 0 |
| GNAI2    | 0 | 0.664290612  | 0.659 | 0.42  | 0 |
| B3GALNT2 | 0 | 1.643477689  | 0.32  | 0.081 | 0 |
| DYNLL1   | 0 | 0.926556981  | 0.841 | 0.602 | 0 |

|            |   |              |       |       |   |
|------------|---|--------------|-------|-------|---|
| NAE1       | 0 | 1.033296003  | 0.417 | 0.178 | 0 |
| PTTG1IP    | 0 | 1.202318621  | 0.411 | 0.172 | 0 |
| POLR2G     | 0 | 0.995183242  | 0.466 | 0.228 | 0 |
| MTCH2      | 0 | 1.14247988   | 0.42  | 0.182 | 0 |
| SNRPC      | 0 | 0.66770827   | 0.616 | 0.378 | 0 |
| RWDD1      | 0 | 0.47185114   | 0.704 | 0.466 | 0 |
| SMC2       | 0 | 1.435595237  | 0.365 | 0.128 | 0 |
| ZNHIT1     | 0 | 0.511049194  | 0.688 | 0.451 | 0 |
| PRKCB      | 0 | -1.484646642 | 0.057 | 0.292 | 0 |
| SF3A3      | 0 | 1.100754027  | 0.425 | 0.19  | 0 |
| KRR1       | 0 | 0.628046074  | 0.554 | 0.32  | 0 |
| GGH        | 0 | 1.49406422   | 0.371 | 0.137 | 0 |
| PLA2G16    | 0 | 0.379213971  | 0.64  | 0.406 | 0 |
| SLC38A1    | 0 | 0.534210175  | 0.578 | 0.344 | 0 |
| PSMB3      | 0 | 0.541269169  | 0.733 | 0.501 | 0 |
| ECHDC1     | 0 | 0.94022131   | 0.454 | 0.223 | 0 |
| RARS       | 0 | 0.992282583  | 0.413 | 0.182 | 0 |
| UBE2V2     | 0 | 0.78534755   | 0.491 | 0.26  | 0 |
| TIAL1      | 0 | 0.650532935  | 0.521 | 0.292 | 0 |
| LYRM7      | 0 | 1.399069983  | 0.323 | 0.094 | 0 |
| APOL6      | 0 | -1.029192407 | 0.177 | 0.405 | 0 |
| HSBP1      | 0 | 1.142084327  | 0.463 | 0.235 | 0 |
| NBN        | 0 | 0.932663059  | 0.436 | 0.208 | 0 |
| TMEM126B   | 0 | 0.949670764  | 0.428 | 0.2   | 0 |
| ATP5MF     | 0 | 0.534577875  | 0.787 | 0.561 | 0 |
| UNG        | 0 | 2.06903716   | 0.285 | 0.059 | 0 |
| CCDC91     | 0 | 0.771219411  | 0.471 | 0.246 | 0 |
| DHX30      | 0 | 1.002081767  | 0.374 | 0.15  | 0 |
| GOLGA7     | 0 | 1.143295454  | 0.393 | 0.169 | 0 |
| COX7B      | 0 | 0.615745033  | 0.834 | 0.61  | 0 |
| MED12L     | 0 | 2.737022052  | 0.241 | 0.018 | 0 |
| SAMSN1     | 0 | -2.36556343  | 0.033 | 0.256 | 0 |
| BRIX1      | 0 | 0.822793763  | 0.427 | 0.205 | 0 |
| BAG2       | 0 | 1.971472105  | 0.284 | 0.062 | 0 |
| SETD7      | 0 | 1.03036481   | 0.369 | 0.148 | 0 |
| AC006058.1 | 0 | 3.689492925  | 0.228 | 0.009 | 0 |
| PARK7      | 0 | 0.626186949  | 0.802 | 0.584 | 0 |
| FAM210A    | 0 | 1.382340305  | 0.316 | 0.098 | 0 |
| GTF2H5     | 0 | 0.848038326  | 0.437 | 0.219 | 0 |
| RAD51C     | 0 | 1.707064756  | 0.303 | 0.086 | 0 |
| ATP5PF     | 0 | 0.781948155  | 0.849 | 0.633 | 0 |
| C4orf46    | 0 | 2.224799477  | 0.259 | 0.044 | 0 |
| MAPRE2     | 0 | 1.868629771  | 0.257 | 0.044 | 0 |
| MRPL39     | 0 | 1.665907052  | 0.307 | 0.094 | 0 |
| NSMCE3     | 0 | -2.339083822 | 0.094 | 0.306 | 0 |
| CKS1B      | 0 | 1.265088089  | 0.391 | 0.182 | 0 |
| CTR9       | 0 | 0.894626148  | 0.381 | 0.172 | 0 |
| PRPS2      | 0 | 1.230407496  | 0.332 | 0.125 | 0 |
| EXOSC7     | 0 | 1.108314041  | 0.357 | 0.151 | 0 |
| PKN1       | 0 | 0.291677929  | 0.48  | 0.274 | 0 |



|            |   |              |       |       |   |
|------------|---|--------------|-------|-------|---|
| SEC61G     | 0 | 0.533418637  | 0.874 | 0.669 | 0 |
| MGST2      | 0 | 1.394664583  | 0.345 | 0.141 | 0 |
| CREB5      | 0 | 1.104029616  | 0.283 | 0.082 | 0 |
| MRPS9      | 0 | 0.831429722  | 0.359 | 0.159 | 0 |
| FAM111A    | 0 | 1.164817089  | 0.311 | 0.113 | 0 |
| PRDX2      | 0 | 0.813581728  | 0.816 | 0.62  | 0 |
| AC098850.3 | 0 | -4.415245629 | 0.011 | 0.206 | 0 |
| CUTC       | 0 | 1.310053625  | 0.284 | 0.091 | 0 |
| DLD        | 0 | 1.008961399  | 0.307 | 0.115 | 0 |
| KLF3       | 0 | -1.932565569 | 0.117 | 0.309 | 0 |
| PHF19      | 0 | 1.882016652  | 0.264 | 0.073 | 0 |
| RASD1      | 0 | -5.067100576 | 0.009 | 0.198 | 0 |
| HOPX       | 0 | 1.685368902  | 0.256 | 0.069 | 0 |
| MCM6       | 0 | 1.462979157  | 0.279 | 0.093 | 0 |
| GPN3       | 0 | 1.264026689  | 0.282 | 0.099 | 0 |
| CXCR4      | 0 | -1.492094528 | 0.288 | 0.467 | 0 |
| MKI67      | 0 | 2.464828436  | 0.204 | 0.026 | 0 |
| NLRP2      | 0 | 3.920228433  | 0.182 | 0.012 | 0 |
| ENAH       | 0 | 2.350844766  | 0.193 | 0.024 | 0 |
| GLUL       | 0 | -0.463432602 | 0.057 | 0.225 | 0 |
| TUT4       | 0 | -1.571893356 | 0.277 | 0.445 | 0 |
| HSPA1B     | 0 | -3.589401052 | 0.195 | 0.362 | 0 |
| C12orf73   | 0 | 1.616174412  | 0.218 | 0.052 | 0 |
| LY96       | 0 | -1.565670048 | 0.166 | 0.332 | 0 |
| EPHA6      | 0 | 2.090576232  | 0.217 | 0.052 | 0 |
| PARPBP     | 0 | 2.61523168   | 0.183 | 0.018 | 0 |
| PIAS2      | 0 | 0.327765857  | 0.317 | 0.152 | 0 |
| CITED2     | 0 | -2.144712212 | 0.243 | 0.408 | 0 |
| MFSD8      | 0 | 1.041863032  | 0.25  | 0.087 | 0 |
| SLC8A1     | 0 | -1.931455671 | 0.012 | 0.175 | 0 |
| MAGEC2     | 0 | 2.282034077  | 0.186 | 0.024 | 0 |
| DEPTOR     | 0 | -2.365696156 | 0.105 | 0.266 | 0 |
| CCNB2      | 0 | 3.152638657  | 0.176 | 0.015 | 0 |
| TENM1      | 0 | 4.496324121  | 0.163 | 0.004 | 0 |
| DUSP5      | 0 | -1.597128069 | 0.477 | 0.634 | 0 |
| EIF3E      | 0 | 0.903193582  | 0.876 | 0.72  | 0 |
| CDC6       | 0 | 1.950497599  | 0.195 | 0.041 | 0 |
| PTCH1      | 0 | 1.288135132  | 0.192 | 0.041 | 0 |
| ESR2       | 0 | 2.609705587  | 0.159 | 0.013 | 0 |
| IGSF10     | 0 | 1.837159353  | 0.159 | 0.016 | 0 |
| PIK3AP1    | 0 | 2.26692331   | 0.169 | 0.026 | 0 |
| ATP5MG     | 0 | 1.151892968  | 0.916 | 0.774 | 0 |
| FAM216A    | 0 | 1.998150699  | 0.172 | 0.03  | 0 |
| FCRL2      | 0 | -4.307206178 | 0.023 | 0.163 | 0 |
| CD86       | 0 | -1.630197142 | 0.024 | 0.163 | 0 |
| SGO1       | 0 | 2.880703864  | 0.151 | 0.015 | 0 |
| BIRC5      | 0 | 2.55268575   | 0.153 | 0.018 | 0 |
| TPX2       | 0 | 2.306901266  | 0.15  | 0.02  | 0 |
| TP53INP1   | 0 | -0.452118395 | 0.556 | 0.428 | 0 |
| CCNB1      | 0 | 2.61060301   | 0.149 | 0.021 | 0 |

|            |   |              |       |       |   |
|------------|---|--------------|-------|-------|---|
| DSCR8      | 0 | 1.660452231  | 0.148 | 0.027 | 0 |
| ZWINT      | 0 | 2.132863684  | 0.139 | 0.02  | 0 |
| TCTEX1D2   | 0 | 1.934298372  | 0.146 | 0.028 | 0 |
| MND1       | 0 | 2.9110809    | 0.128 | 0.011 | 0 |
| PALLD      | 0 | 4.268485092  | 0.118 | 0.003 | 0 |
| DEPDC1     | 0 | 3.002123388  | 0.121 | 0.009 | 0 |
| NCAPG      | 0 | 2.607586159  | 0.126 | 0.015 | 0 |
| PRC1       | 0 | 2.104210214  | 0.13  | 0.019 | 0 |
| ATP5MPL    | 0 | -0.303410403 | 0.675 | 0.565 | 0 |
| JTB        | 0 | -0.436865905 | 0.743 | 0.633 | 0 |
| TPM4       | 0 | -0.501102314 | 0.768 | 0.659 | 0 |
| MGLL       | 0 | 1.943367778  | 0.126 | 0.019 | 0 |
| EVI2B      | 0 | -0.515715983 | 0.678 | 0.574 | 0 |
| JUN        | 0 | -2.86322098  | 0.864 | 0.962 | 0 |
| H3F3A      | 0 | 0.586282753  | 0.928 | 0.831 | 0 |
| FGFR3      | 0 | -13.3903156  | 0     | 0.096 | 0 |
| PBK        | 0 | 3.080433975  | 0.103 | 0.008 | 0 |
| APOBEC3B   | 0 | 3.611632696  | 0.1   | 0.006 | 0 |
| PLK4       | 0 | 3.277419858  | 0.101 | 0.007 | 0 |
| AC006058.3 | 0 | 3.802352802  | 0.088 | 0.004 | 0 |
| CD63       | 0 | -0.990615603 | 0.711 | 0.63  | 0 |
| HSPB1      | 0 | -2.768301324 | 0.445 | 0.523 | 0 |
| SSR4       | 0 | -2.131363247 | 0.897 | 0.973 | 0 |
| RASL10B    | 0 | 6.652886174  | 0.076 | 0.001 | 0 |
| FOS        | 0 | -0.797007171 | 0.846 | 0.92  | 0 |
| AC136475.3 | 0 | 5.776966913  | 0.074 | 0.001 | 0 |
| ZFP36L2    | 0 | -1.280421039 | 0.534 | 0.607 | 0 |
| TXNIP      | 0 | -1.197487688 | 0.676 | 0.742 | 0 |
| SRRM2      | 0 | -0.425819357 | 0.765 | 0.701 | 0 |
| CD53       | 0 | -0.754251856 | 0.475 | 0.537 | 0 |
| PNRC1      | 0 | -0.358745578 | 0.844 | 0.786 | 0 |
| DNAJB9     | 0 | -0.782020261 | 0.564 | 0.516 | 0 |
| CPEB4      | 0 | -1.019197606 | 0.513 | 0.557 | 0 |
| MDM4       | 0 | -1.054296841 | 0.591 | 0.626 | 0 |
| FBXW7      | 0 | -0.542880132 | 0.74  | 0.707 | 0 |
| CIRBP      | 0 | -1.121610131 | 0.76  | 0.792 | 0 |
| IER2       | 0 | -1.506783145 | 0.851 | 0.82  | 0 |
| IER5       | 0 | -0.679708655 | 0.574 | 0.545 | 0 |
| DDX24      | 0 | -0.889866647 | 0.549 | 0.521 | 0 |
| DDIT4      | 0 | -1.705858436 | 0.296 | 0.317 | 0 |
| STAT3      | 0 | -1.009047391 | 0.515 | 0.535 | 0 |
| KLF13      | 0 | -0.646721913 | 0.62  | 0.605 | 0 |
| JUND       | 0 | -0.936465279 | 0.937 | 0.951 | 0 |
| SQSTM1     | 0 | -0.867244032 | 0.507 | 0.52  | 0 |
| H1FX       | 0 | -1.051421957 | 0.762 | 0.751 | 0 |
| HLA-E      | 0 | -1.405035856 | 0.834 | 0.845 | 0 |
| TSTD1      | 0 | -1.012818196 | 0.561 | 0.572 | 0 |
| GNAS       | 0 | -0.623316243 | 0.893 | 0.884 | 0 |
| SMAP2      | 0 | -0.98527339  | 0.365 | 0.374 | 0 |
| EEF1A1     | 0 | 0.370415577  | 0.991 | 0.996 | 0 |

|           |                       |              |              |       |       |                       |   |
|-----------|-----------------------|--------------|--------------|-------|-------|-----------------------|---|
| EEF1D     |                       | 0            | -0.52823342  | 0.92  | 0.923 |                       | 0 |
| TPT1      |                       | 0            | -0.614602609 | 0.983 | 0.985 |                       | 0 |
| DPM1      | 9.88131291682493e-324 |              | 0.877727298  | 0.422 | 0.208 | 2.1103519996463e-319  |   |
| SEL1L3    | 4.94065645841247e-323 |              | 0.508172254  | 0.41  | 0.211 | 1.05517599982315e-318 |   |
| TPD52     | 1.03753785626662e-322 |              | 0.511372681  | 0.77  | 0.548 | 2.21586959962862e-318 |   |
| COPB1     | 2.07507571253324e-322 |              | 0.506250612  | 0.611 | 0.381 | 4.43173919925723e-318 |   |
| PRR11     | 3.50786608547285e-322 |              | 2.775994029  | 0.106 | 0.012 | 7.49174959874437e-318 |   |
| BUB1      | 4.15015142506647e-322 |              | 1.917431182  | 0.131 | 0.023 | 8.86347839851446e-318 |   |
| NSD2      | 6.37344683135208e-322 |              | -1.987601073 | 0.2   | 0.176 | 1.36117703977186e-317 |   |
| GCA       | 3.98710976193886e-321 |              | 0.936177892  | 0.281 | 0.114 | 8.51527031857282e-317 |   |
| ATP5PD    | 4.72820823070073e-321 |              | 0.332120158  | 0.737 | 0.517 | 1.00980343183075e-316 |   |
| SGO2      | 7.30723090199204e-321 |              | 1.94729937   | 0.135 | 0.024 | 1.56060530373844e-316 |   |
| PCCB      | 1.47528001848196e-320 |              | 0.34962619   | 0.375 | 0.195 | 3.15075553547193e-316 |   |
| ASAH1     | 7.31217155845045e-320 |              | 0.70117916   | 0.558 | 0.329 | 1.56166047973826e-315 |   |
| NDUFA8    | 3.22185148309535e-318 |              | 0.719965471  | 0.443 | 0.229 | 6.88090821244675e-314 |   |
| STIP1     | 4.50656050066343e-318 |              | 0.794700927  | 0.441 | 0.226 | 9.62466126126689e-314 |   |
| CCDC85B   | 1.05325655478906e-317 |              | 0.451836371  | 0.843 | 0.684 | 2.24944002406299e-313 |   |
| SEC24D    | 2.12213398310268e-317 |              | 0.522711745  | 0.573 | 0.346 | 4.53224154771239e-313 |   |
| HIGD1A    | 1.76769745471543e-315 |              | 0.949194347  | 0.359 | 0.162 | 3.77527145403574e-311 |   |
| APP       | 2.24545392441826e-314 |              | 0.594529126  | 0.386 | 0.189 | 4.79561594638008e-310 |   |
| MRPS23    | 4.4179662651399e-314  |              | 0.895635527  | 0.42  | 0.209 | 9.43545055245929e-310 |   |
| DTNA      | 1.12E-306             | 0.434759761  | 0.151        | 0.053 |       | 2.39E-302             |   |
| AKAP13    | 4.26E-306             | 0.461951287  | 0.691        | 0.465 |       | 9.11E-302             |   |
| MAN1A1    | 5.42E-306             | -0.315836679 | 0.516        | 0.384 |       | 1.16E-301             |   |
| KIF15     | 2.58E-305             | 2.380129835  | 0.101        | 0.012 |       | 5.51E-301             |   |
| ILF2      | 3.71E-303             | 0.455223739  | 0.643        | 0.42  |       | 7.92E-299             |   |
| MYC       | 6.07E-303             | -1.519126404 | 0.167        | 0.345 |       | 1.30E-298             |   |
| IRF1      | 3.32E-302             | -0.518406639 | 0.853        | 0.841 |       | 7.09E-298             |   |
| PSMC5     | 5.77E-302             | 0.610395344  | 0.622        | 0.395 |       | 1.23E-297             |   |
| CALU      | 1.54E-301             | 0.446080075  | 0.621        | 0.401 |       | 3.28E-297             |   |
| MAT2A     | 5.89E-300             | 0.759320104  | 0.435        | 0.228 |       | 1.26E-295             |   |
| SLC23A1   | 2.86E-299             | 2.291526726  | 0.108        | 0.015 |       | 6.10E-295             |   |
| HSP90AA1  | 1.11E-297             | -0.357998727 | 0.896        | 0.784 |       | 2.36E-293             |   |
| DDX1      | 5.84E-297             | 0.709561758  | 0.433        | 0.227 |       | 1.25E-292             |   |
| COA3      | 1.17E-295             | 0.723999881  | 0.471        | 0.258 |       | 2.50E-291             |   |
| FAM227B   | 6.55E-295             | 1.011737726  | 0.176        | 0.052 |       | 1.40E-290             |   |
| RBM8A     | 7.50E-294             | 0.328849066  | 0.712        | 0.501 |       | 1.60E-289             |   |
| MED23     | 2.48E-293             | 0.663527052  | 0.271        | 0.115 |       | 5.30E-289             |   |
| ZNF22     | 5.47E-291             | 0.691076831  | 0.427        | 0.225 |       | 1.17E-286             |   |
| ST6GAL1   | 6.15E-290             | -0.855007798 | 0.447        | 0.475 |       | 1.31E-285             |   |
| ECHS1     | 8.59E-289             | 0.756542091  | 0.465        | 0.255 |       | 1.83E-284             |   |
| MPHOSPH10 | 1.15E-288             | 0.66713347   | 0.446        | 0.241 |       | 2.45E-284             |   |
| SNTB1     | 1.26E-288             | 1.705938989  | 0.102        | 0.016 |       | 2.69E-284             |   |
| TRAPPC4   | 2.90E-288             | 0.84268709   | 0.422        | 0.219 |       | 6.19E-284             |   |
| ATF3      | 5.35E-288             | -0.451269471 | 0.457        | 0.32  |       | 1.14E-283             |   |
| IKBIP     | 1.92E-287             | 0.916482329  | 0.372        | 0.179 |       | 4.11E-283             |   |
| NDUFB5    | 2.94E-287             | 0.556154812  | 0.623        | 0.401 |       | 6.29E-283             |   |
| MT1X      | 6.40E-287             | 1.511774189  | 0.222        | 0.073 |       | 1.37E-282             |   |
| CEP55     | 2.40E-286             | 2.99652056   | 0.092        | 0.009 |       | 5.12E-282             |   |
| UBE2K     | 2.95E-286             | 0.530583901  | 0.54         | 0.328 |       | 6.30E-282             |   |

|            |           |              |       |       |           |
|------------|-----------|--------------|-------|-------|-----------|
| FUT8       | 7.03E-286 | 0.381302474  | 0.574 | 0.362 | 1.50E-281 |
| COBLL1     | 1.76E-285 | -0.741038412 | 0.48  | 0.435 | 3.76E-281 |
| IL6ST      | 8.23E-285 | -1.075453332 | 0.353 | 0.494 | 1.76E-280 |
| VPS11      | 2.18E-284 | 1.118103057  | 0.204 | 0.066 | 4.66E-280 |
| POLB       | 5.97E-284 | 1.183501504  | 0.218 | 0.074 | 1.28E-279 |
| TMEM65     | 1.17E-283 | 0.387761212  | 0.261 | 0.121 | 2.50E-279 |
| NAV1       | 1.22E-282 | 0.970902208  | 0.186 | 0.062 | 2.62E-278 |
| ERN1       | 1.76E-282 | -0.332802981 | 0.557 | 0.466 | 3.76E-278 |
| TTK        | 1.07E-281 | 2.732618224  | 0.088 | 0.009 | 2.28E-277 |
| TIPRL      | 1.87E-280 | 0.645512898  | 0.455 | 0.252 | 4.00E-276 |
| TIMM13     | 7.14E-280 | 0.417330988  | 0.718 | 0.503 | 1.52E-275 |
| UBE2B      | 2.02E-279 | -0.272531114 | 0.575 | 0.486 | 4.32E-275 |
| RGS9       | 3.33E-279 | 3.376322132  | 0.072 | 0.004 | 7.11E-275 |
| IFRD2      | 3.64E-278 | 0.360075003  | 0.47  | 0.277 | 7.78E-274 |
| PGK1       | 5.75E-278 | 0.425722968  | 0.671 | 0.462 | 1.23E-273 |
| TTLL7      | 3.75E-277 | -1.490371681 | 0.239 | 0.351 | 8.00E-273 |
| YWHAE      | 3.29E-276 | 0.465152343  | 0.807 | 0.612 | 7.02E-272 |
| ALCAM      | 1.33E-274 | 0.887967955  | 0.384 | 0.192 | 2.84E-270 |
| IFIH1      | 1.88E-274 | 0.698713062  | 0.358 | 0.178 | 4.02E-270 |
| RAB7A      | 2.12E-274 | 0.692152488  | 0.504 | 0.295 | 4.52E-270 |
| SEPTIN2    | 5.42E-274 | 0.431442916  | 0.693 | 0.48  | 1.16E-269 |
| ADGRG5     | 6.43E-274 | 1.640460094  | 0.179 | 0.05  | 1.37E-269 |
| NUP107     | 6.60E-274 | 0.735268548  | 0.256 | 0.109 | 1.41E-269 |
| AHSA1      | 1.82E-273 | 0.934052226  | 0.349 | 0.165 | 3.89E-269 |
| MRPS14     | 2.22E-273 | 0.625716804  | 0.458 | 0.257 | 4.75E-269 |
| IER3IP1    | 5.95E-273 | 0.625332917  | 0.515 | 0.305 | 1.27E-268 |
| COX6B1     | 6.40E-273 | 0.436265576  | 0.864 | 0.683 | 1.37E-268 |
| NUDT6      | 6.53E-273 | 1.207330369  | 0.196 | 0.063 | 1.40E-268 |
| COQ3       | 4.64E-271 | 1.653691357  | 0.129 | 0.027 | 9.91E-267 |
| NEDD8      | 6.57E-271 | 0.309701157  | 0.731 | 0.534 | 1.40E-266 |
| PDCD4-AS1  | 1.32E-270 | 2.008322852  | 0.136 | 0.029 | 2.83E-266 |
| PSMA3      | 1.50E-270 | 0.30964857   | 0.565 | 0.372 | 3.21E-266 |
| TMEM184C   | 2.01E-270 | 1.250320913  | 0.213 | 0.073 | 4.29E-266 |
| CYLD       | 3.07E-270 | 0.702451094  | 0.462 | 0.259 | 6.56E-266 |
| CYP20A1    | 7.22E-270 | -1.263301275 | 0.289 | 0.33  | 1.54E-265 |
| UMPS       | 6.10E-269 | 1.068562934  | 0.226 | 0.083 | 1.30E-264 |
| UQCRC2     | 7.93E-269 | 0.470572543  | 0.595 | 0.385 | 1.69E-264 |
| ABRACL     | 2.23E-268 | 0.805719438  | 0.396 | 0.207 | 4.77E-264 |
| HOOK2      | 6.78E-268 | 0.313757459  | 0.292 | 0.149 | 1.45E-263 |
| DLGAP5     | 7.27E-268 | 2.096493     | 0.098 | 0.014 | 1.55E-263 |
| COMMD1     | 7.07E-267 | 0.626463103  | 0.452 | 0.253 | 1.51E-262 |
| USP10      | 1.17E-266 | 0.658794373  | 0.311 | 0.147 | 2.50E-262 |
| AC245014.3 | 3.23E-266 | -1.036894586 | 0.581 | 0.579 | 6.89E-262 |
| NDUFAF4    | 3.89E-266 | 0.483027803  | 0.47  | 0.275 | 8.30E-262 |
| MTIF2      | 9.22E-265 | 0.81172755   | 0.365 | 0.183 | 1.97E-260 |
| NAPG       | 1.46E-264 | 0.513750631  | 0.382 | 0.205 | 3.12E-260 |
| LMO4       | 1.94E-264 | -0.562456796 | 0.573 | 0.51  | 4.13E-260 |
| DNAJC12    | 6.61E-264 | 1.006659612  | 0.258 | 0.103 | 1.41E-259 |
| GK5        | 6.75E-264 | 0.351133299  | 0.211 | 0.093 | 1.44E-259 |
| NDNF       | 7.89E-263 | -2.272029138 | 0.079 | 0.182 | 1.68E-258 |

|            |           |              |       |       |           |
|------------|-----------|--------------|-------|-------|-----------|
| DCAF7      | 9.88E-263 | 0.883927117  | 0.35  | 0.17  | 2.11E-258 |
| BUB1B      | 1.17E-262 | 2.357876507  | 0.094 | 0.013 | 2.50E-258 |
| ZNF714     | 1.37E-262 | 1.809726182  | 0.11  | 0.02  | 2.92E-258 |
| TSPYL1     | 2.65E-262 | 0.347372349  | 0.478 | 0.29  | 5.65E-258 |
| NDUFV3     | 6.07E-262 | 0.427790243  | 0.565 | 0.361 | 1.30E-257 |
| SDC1       | 7.17E-262 | -0.836448893 | 0.576 | 0.536 | 1.53E-257 |
| CCDC66     | 1.25E-261 | 0.412647228  | 0.38  | 0.21  | 2.66E-257 |
| ELMO1      | 2.30E-261 | 0.78250876   | 0.289 | 0.129 | 4.91E-257 |
| SUV39H2    | 3.05E-261 | 1.661342621  | 0.115 | 0.023 | 6.51E-257 |
| CDCA8      | 1.35E-260 | 2.308397527  | 0.09  | 0.011 | 2.88E-256 |
| BAZ2B      | 1.69E-259 | -1.207162114 | 0.28  | 0.396 | 3.60E-255 |
| GMDS       | 1.69E-259 | 0.58601898   | 0.341 | 0.171 | 3.61E-255 |
| SUMF2      | 2.24E-259 | -1.03496673  | 0.378 | 0.437 | 4.79E-255 |
| TFG        | 2.12E-258 | 0.347837432  | 0.52  | 0.332 | 4.54E-254 |
| UBE2L6     | 3.42E-258 | 0.899486838  | 0.421 | 0.227 | 7.31E-254 |
| SPC25      | 2.10E-257 | 2.747418046  | 0.077 | 0.007 | 4.49E-253 |
| KIF23      | 2.51E-257 | 2.633037163  | 0.084 | 0.009 | 5.36E-253 |
| DDX3Y      | 3.37E-257 | -1.141576514 | 0.097 | 0.26  | 7.21E-253 |
| GNG5       | 9.93E-257 | 0.374482758  | 0.726 | 0.524 | 2.12E-252 |
| REXO1      | 1.85E-256 | 0.341979844  | 0.295 | 0.151 | 3.96E-252 |
| MCTS1      | 2.30E-254 | 0.347718328  | 0.534 | 0.339 | 4.91E-250 |
| RGS1       | 2.31E-254 | -0.662425942 | 0.422 | 0.317 | 4.94E-250 |
| RPF2       | 1.72E-252 | 0.573084806  | 0.368 | 0.195 | 3.68E-248 |
| TATDN1     | 1.25E-251 | 0.380149217  | 0.493 | 0.302 | 2.67E-247 |
| TRIM28     | 2.47E-251 | 0.26456391   | 0.49  | 0.309 | 5.27E-247 |
| CNKS1      | 1.39E-250 | 0.620254283  | 0.113 | 0.034 | 2.97E-246 |
| AC109830.1 | 1.92E-249 | 3.604984065  | 0.058 | 0.003 | 4.10E-245 |
| ZFAND1     | 1.57E-248 | 0.447981895  | 0.469 | 0.279 | 3.36E-244 |
| TWSG1      | 2.47E-247 | 1.299730588  | 0.203 | 0.07  | 5.28E-243 |
| LINC02551  | 4.92E-247 | 1.577747691  | 0.107 | 0.022 | 1.05E-242 |
| CYB5B      | 4.98E-246 | 0.930446393  | 0.242 | 0.1   | 1.06E-241 |
| ILF3-DT    | 1.04E-245 | -0.456067486 | 0.521 | 0.432 | 2.23E-241 |
| MRPS25     | 7.64E-245 | 0.391612407  | 0.382 | 0.218 | 1.63E-240 |
| C11orf58   | 1.58E-242 | 0.43786268   | 0.742 | 0.544 | 3.37E-238 |
| CDKN1C     | 1.41E-241 | -1.439594373 | 0.009 | 0.096 | 3.02E-237 |
| MRPL50     | 8.32E-241 | 0.769736823  | 0.372 | 0.194 | 1.78E-236 |
| CCDC107    | 1.88E-240 | -1.450210497 | 0.171 | 0.312 | 4.02E-236 |
| DAP3       | 8.51E-240 | 0.29156205   | 0.565 | 0.379 | 1.82E-235 |
| SLC12A2    | 1.51E-239 | 0.434601661  | 0.222 | 0.102 | 3.23E-235 |
| POLR1E     | 3.41E-239 | 0.576017067  | 0.251 | 0.115 | 7.29E-235 |
| POLR3K     | 5.36E-239 | 1.035858809  | 0.251 | 0.103 | 1.14E-234 |
| VEGFA      | 7.90E-239 | -1.375142619 | 0.059 | 0.197 | 1.69E-234 |
| CEP57L1    | 1.25E-237 | 0.693558555  | 0.197 | 0.078 | 2.67E-233 |
| SNAPC5     | 6.07E-237 | 0.761781951  | 0.337 | 0.169 | 1.30E-232 |
| GPR132     | 3.30E-236 | 3.863545301  | 0.056 | 0.002 | 7.05E-232 |
| ASF1B      | 1.06E-235 | 1.688010041  | 0.1   | 0.019 | 2.26E-231 |
| TEDC1      | 1.64E-235 | 1.700586771  | 0.135 | 0.034 | 3.50E-231 |
| TIMP2      | 3.71E-235 | 0.305146475  | 0.386 | 0.238 | 7.93E-231 |
| RAB11A     | 4.88E-235 | 0.710842692  | 0.409 | 0.227 | 1.04E-230 |
| COMMD6     | 8.17E-235 | 0.350772003  | 0.663 | 0.475 | 1.75E-230 |

|           |           |              |       |       |           |
|-----------|-----------|--------------|-------|-------|-----------|
| CKAP2L    | 1.54E-234 | 2.287351814  | 0.081 | 0.01  | 3.29E-230 |
| TERF1     | 4.41E-234 | 0.662282055  | 0.421 | 0.239 | 9.41E-230 |
| TM7SF2    | 2.55E-233 | 0.314258475  | 0.24  | 0.122 | 5.44E-229 |
| KIFC1     | 8.68E-233 | 2.061111091  | 0.089 | 0.014 | 1.85E-228 |
| IRF4      | 1.12E-231 | -0.412114016 | 0.574 | 0.51  | 2.38E-227 |
| INSR      | 1.55E-231 | -0.853305693 | 0.389 | 0.417 | 3.31E-227 |
| MNAT1     | 1.66E-231 | 0.526047365  | 0.317 | 0.162 | 3.54E-227 |
| CARMIL1   | 1.73E-231 | -0.86477133  | 0.383 | 0.383 | 3.70E-227 |
| C18orf54  | 1.40E-230 | 2.563386748  | 0.064 | 0.005 | 3.00E-226 |
| IFI27L2   | 4.35E-229 | -0.640908026 | 0.353 | 0.356 | 9.30E-225 |
| RACGAP1   | 3.85E-228 | 2.366925087  | 0.092 | 0.015 | 8.21E-224 |
| SAP30     | 4.16E-228 | 1.076957314  | 0.281 | 0.127 | 8.89E-224 |
| DRG1      | 1.06E-227 | 0.85445376   | 0.299 | 0.142 | 2.26E-223 |
| NCAPH     | 2.00E-227 | 2.813927719  | 0.074 | 0.008 | 4.26E-223 |
| KCNQ5     | 3.57E-227 | 0.331819906  | 0.14  | 0.057 | 7.63E-223 |
| IRAK1     | 4.86E-227 | -0.410216977 | 0.493 | 0.414 | 1.04E-222 |
| TK1       | 6.58E-227 | 1.192220862  | 0.102 | 0.023 | 1.40E-222 |
| VAMP2     | 1.49E-226 | -0.310315628 | 0.547 | 0.474 | 3.18E-222 |
| EYA3      | 1.56E-226 | 1.036483305  | 0.19  | 0.069 | 3.33E-222 |
| KIAA1217  | 4.36E-226 | 0.274752639  | 0.534 | 0.356 | 9.31E-222 |
| PHF1      | 1.61E-223 | -1.620503287 | 0.135 | 0.275 | 3.43E-219 |
| ZNF250    | 5.00E-223 | -3.00093543  | 0.036 | 0.139 | 1.07E-218 |
| GATB      | 4.32E-222 | 1.255355292  | 0.154 | 0.047 | 9.22E-218 |
| ADAR      | 5.09E-221 | -0.533070596 | 0.588 | 0.555 | 1.09E-216 |
| HAUS1     | 3.41E-220 | 0.645570633  | 0.299 | 0.151 | 7.28E-216 |
| RIOX2     | 5.11E-220 | 0.596333944  | 0.356 | 0.192 | 1.09E-215 |
| ECI2      | 7.85E-220 | 0.652257731  | 0.402 | 0.227 | 1.68E-215 |
| OSGEP     | 1.59E-219 | 0.643893869  | 0.264 | 0.125 | 3.40E-215 |
| ANKS6     | 2.83E-219 | 0.614829524  | 0.138 | 0.049 | 6.03E-215 |
| TXNDC11   | 2.04E-218 | -0.331871414 | 0.616 | 0.551 | 4.36E-214 |
| NUF2      | 3.35E-218 | 1.948897741  | 0.087 | 0.015 | 7.16E-214 |
| NDUFS1    | 5.64E-217 | 0.427073274  | 0.391 | 0.23  | 1.20E-212 |
| UBB       | 7.43E-217 | 0.257188019  | 0.88  | 0.724 | 1.59E-212 |
| SNRNP40   | 2.69E-216 | 0.812347635  | 0.294 | 0.141 | 5.74E-212 |
| JMJD1C    | 3.14E-216 | -0.42578567  | 0.617 | 0.548 | 6.71E-212 |
| RTF2      | 5.07E-216 | 0.549099739  | 0.463 | 0.283 | 1.08E-211 |
| CMTM3     | 8.66E-216 | 2.666021342  | 0.081 | 0.011 | 1.85E-211 |
| KMT2B     | 1.49E-215 | 0.301558541  | 0.351 | 0.205 | 3.17E-211 |
| TSG101    | 3.51E-215 | 0.706643959  | 0.388 | 0.217 | 7.50E-211 |
| OGFOD1    | 5.89E-214 | 0.896870225  | 0.212 | 0.086 | 1.26E-209 |
| PHAX      | 2.26E-213 | 0.476606492  | 0.395 | 0.23  | 4.82E-209 |
| FRAT2     | 2.19E-212 | 0.489963847  | 0.262 | 0.132 | 4.68E-208 |
| DDIAS     | 2.47E-212 | 2.186745893  | 0.076 | 0.011 | 5.26E-208 |
| IFI16     | 1.50E-211 | -0.3768509   | 0.621 | 0.563 | 3.20E-207 |
| CDC20     | 3.30E-211 | 1.801284022  | 0.084 | 0.014 | 7.04E-207 |
| EIF5      | 5.30E-211 | -0.326837252 | 0.624 | 0.549 | 1.13E-206 |
| MAP1LC3B  | 1.27E-210 | -0.696358405 | 0.397 | 0.431 | 2.72E-206 |
| LYRM1     | 1.41E-210 | 0.519279898  | 0.325 | 0.174 | 3.01E-206 |
| LINC00582 | 6.79E-210 | 0.491760126  | 0.15  | 0.06  | 1.45E-205 |
| PRIM2     | 7.44E-210 | 0.748482732  | 0.157 | 0.057 | 1.59E-205 |

|          |           |              |       |       |           |
|----------|-----------|--------------|-------|-------|-----------|
| COA6     | 9.10E-210 | 0.646385043  | 0.342 | 0.185 | 1.94E-205 |
| TIMMDC1  | 2.41E-209 | 0.520804002  | 0.417 | 0.247 | 5.15E-205 |
| PRPS1    | 8.83E-209 | 0.430000143  | 0.301 | 0.159 | 1.89E-204 |
| AZGP1    | 2.15E-208 | -4.130104481 | 0.013 | 0.095 | 4.59E-204 |
| CENPA    | 4.29E-208 | 2.574646706  | 0.066 | 0.007 | 9.16E-204 |
| EXOSC3   | 4.73E-208 | 1.044028548  | 0.225 | 0.094 | 1.01E-203 |
| SLFN13   | 1.34E-206 | 0.355759275  | 0.186 | 0.086 | 2.85E-202 |
| PLGRKT   | 4.01E-206 | 0.699697319  | 0.286 | 0.141 | 8.56E-202 |
| ABCG1    | 4.47E-206 | 2.456787824  | 0.065 | 0.007 | 9.55E-202 |
| ISY1     | 2.48E-205 | 0.956362837  | 0.258 | 0.118 | 5.30E-201 |
| EIF4E2   | 9.63E-205 | 0.84816742   | 0.322 | 0.166 | 2.06E-200 |
| NKG7     | 3.97E-203 | 0.478109068  | 0.06  | 0.136 | 8.48E-199 |
| IL5RA    | 5.53E-203 | -2.619848221 | 0.027 | 0.127 | 1.18E-198 |
| VPS35    | 8.72E-203 | 0.78763874   | 0.376 | 0.21  | 1.86E-198 |
| EIF3B    | 1.39E-202 | 0.344289814  | 0.536 | 0.36  | 2.96E-198 |
| UBALD2   | 2.55E-202 | -0.382577497 | 0.779 | 0.71  | 5.44E-198 |
| CPQ      | 1.41E-201 | -1.451709939 | 0.014 | 0.1   | 3.00E-197 |
| MRPS17   | 3.71E-201 | 1.174993539  | 0.184 | 0.069 | 7.92E-197 |
| RTL8A    | 1.65E-200 | 0.941020299  | 0.228 | 0.099 | 3.53E-196 |
| AIM2     | 1.87E-200 | -0.33819723  | 0.267 | 0.184 | 3.98E-196 |
| XRN1     | 1.59E-199 | -0.412818783 | 0.59  | 0.523 | 3.40E-195 |
| FMNL2    | 3.74E-199 | 1.560876971  | 0.137 | 0.04  | 7.98E-195 |
| APIP     | 9.52E-199 | 0.71644971   | 0.309 | 0.159 | 2.03E-194 |
| SETBP1   | 1.10E-198 | -0.621324859 | 0.375 | 0.333 | 2.36E-194 |
| ZMYND8   | 9.72E-198 | 0.294818578  | 0.404 | 0.255 | 2.08E-193 |
| PDK1     | 9.86E-198 | -0.699909145 | 0.419 | 0.36  | 2.11E-193 |
| CDK1     | 3.75E-197 | 2.072129767  | 0.083 | 0.015 | 8.00E-193 |
| DIAPH3   | 4.21E-197 | 2.476585319  | 0.073 | 0.01  | 8.99E-193 |
| COQ8A    | 8.59E-197 | 0.268303708  | 0.322 | 0.187 | 1.84E-192 |
| FNDC3B   | 5.81E-196 | -0.426935177 | 0.577 | 0.544 | 1.24E-191 |
| CNN3     | 9.05E-196 | 1.882059866  | 0.118 | 0.03  | 1.93E-191 |
| FAM173B  | 9.91E-196 | 0.945147859  | 0.176 | 0.067 | 2.12E-191 |
| MEIS1    | 5.81E-195 | 2.254435529  | 0.064 | 0.008 | 1.24E-190 |
| WASHC3   | 8.40E-195 | 0.550864685  | 0.43  | 0.263 | 1.79E-190 |
| BRD2     | 8.25E-194 | -0.390686753 | 0.619 | 0.563 | 1.76E-189 |
| MFAP1    | 3.60E-192 | 0.906842404  | 0.229 | 0.101 | 7.69E-188 |
| EXOSC8   | 8.22E-192 | 0.639852845  | 0.272 | 0.137 | 1.76E-187 |
| CPSF3    | 1.64E-191 | 0.776894559  | 0.228 | 0.105 | 3.51E-187 |
| BTBD10   | 1.89E-191 | 1.063607044  | 0.141 | 0.047 | 4.04E-187 |
| GLA      | 2.04E-191 | 0.750300886  | 0.228 | 0.103 | 4.35E-187 |
| DEPDC1B  | 6.79E-191 | 1.966139028  | 0.074 | 0.012 | 1.45E-186 |
| DST      | 1.19E-190 | -0.437580971 | 0.701 | 0.62  | 2.53E-186 |
| TMEM70   | 1.35E-190 | 0.521242348  | 0.388 | 0.233 | 2.89E-186 |
| RWDD2B   | 2.43E-190 | 0.905728985  | 0.199 | 0.081 | 5.18E-186 |
| GLO1     | 2.68E-190 | -1.008825066 | 0.266 | 0.347 | 5.71E-186 |
| NIP7     | 4.87E-190 | 0.849583734  | 0.253 | 0.119 | 1.04E-185 |
| TSEN34   | 5.59E-190 | 0.424141331  | 0.322 | 0.181 | 1.19E-185 |
| NDUFB1   | 1.09E-189 | -0.420934918 | 0.458 | 0.421 | 2.34E-185 |
| ANKRD36C | 5.61E-188 | -0.377406325 | 0.251 | 0.182 | 1.20E-183 |
| NUDC     | 8.76E-188 | 0.393537926  | 0.549 | 0.378 | 1.87E-183 |

|            |           |              |       |       |           |
|------------|-----------|--------------|-------|-------|-----------|
| SLC26A2    | 2.16E-187 | 0.674342163  | 0.193 | 0.084 | 4.62E-183 |
| ARPC1A     | 2.22E-187 | 0.521717641  | 0.404 | 0.243 | 4.74E-183 |
| SLC4A1AP   | 5.60E-187 | 0.680030339  | 0.262 | 0.13  | 1.20E-182 |
| WDR61      | 2.08E-186 | 0.441275308  | 0.374 | 0.223 | 4.44E-182 |
| MRPL48     | 2.34E-186 | 0.668826929  | 0.286 | 0.147 | 4.99E-182 |
| CHRM3      | 1.04E-185 | 0.262730052  | 0.125 | 0.056 | 2.22E-181 |
| ACP5       | 1.37E-184 | 0.328120367  | 0.103 | 0.04  | 2.93E-180 |
| PPP3CA     | 3.67E-184 | 0.283010282  | 0.501 | 0.343 | 7.84E-180 |
| PTPRA      | 3.81E-184 | -1.365789203 | 0.14  | 0.26  | 8.14E-180 |
| EBP        | 1.20E-182 | 0.54750568   | 0.358 | 0.206 | 2.57E-178 |
| NUP37      | 2.25E-182 | 0.778140669  | 0.234 | 0.109 | 4.80E-178 |
| F2R        | 4.43E-182 | 0.386953588  | 0.083 | 0.022 | 9.45E-178 |
| CHCHD1     | 4.99E-182 | 0.449010966  | 0.458 | 0.297 | 1.07E-177 |
| NGRN       | 2.67E-180 | 1.090138273  | 0.151 | 0.054 | 5.69E-176 |
| KIAA1143   | 5.34E-180 | 0.587957791  | 0.335 | 0.189 | 1.14E-175 |
| C18orf25   | 3.60E-179 | 0.274794713  | 0.234 | 0.128 | 7.69E-175 |
| DGKZ       | 1.35E-178 | 0.452238992  | 0.246 | 0.129 | 2.89E-174 |
| NR4A1      | 1.55E-178 | -1.004626805 | 0.171 | 0.319 | 3.32E-174 |
| ELP6       | 4.59E-178 | 0.795312106  | 0.22  | 0.102 | 9.80E-174 |
| NCAM1      | 5.61E-178 | -0.872196021 | 0.093 | 0.216 | 1.20E-173 |
| JAM2       | 8.69E-178 | 5.579010095  | 0.036 | 0     | 1.86E-173 |
| KIAA1549   | 4.03E-177 | 0.46209321   | 0.081 | 0.027 | 8.61E-173 |
| ACTL6A     | 5.80E-177 | 0.533480612  | 0.281 | 0.149 | 1.24E-172 |
| KIF4A      | 1.72E-176 | 2.247209078  | 0.064 | 0.009 | 3.68E-172 |
| AF279873.3 | 4.96E-176 | 1.968985804  | 0.068 | 0.011 | 1.06E-171 |
| CPSF1      | 5.91E-176 | 0.313283699  | 0.226 | 0.115 | 1.26E-171 |
| VTA1       | 6.78E-175 | 0.970925125  | 0.216 | 0.096 | 1.45E-170 |
| CDC23      | 6.87E-175 | 0.961530276  | 0.15  | 0.055 | 1.47E-170 |
| ME1        | 1.52E-174 | 1.529053059  | 0.081 | 0.017 | 3.25E-170 |
| MRPS27     | 3.52E-174 | 0.315108844  | 0.245 | 0.132 | 7.51E-170 |
| RPE        | 1.39E-173 | 1.099866652  | 0.171 | 0.068 | 2.97E-169 |
| AK6        | 2.42E-173 | 0.459308372  | 0.361 | 0.214 | 5.17E-169 |
| PLEKHB2    | 7.05E-173 | 0.543987966  | 0.264 | 0.142 | 1.51E-168 |
| ZNF331     | 1.05E-172 | -1.601770776 | 0.109 | 0.218 | 2.25E-168 |
| QRSL1      | 3.69E-170 | 0.796641216  | 0.168 | 0.07  | 7.87E-166 |
| JMY        | 5.01E-170 | -0.310570747 | 0.431 | 0.344 | 1.07E-165 |
| LINC00920  | 2.04E-169 | 2.083495499  | 0.103 | 0.027 | 4.35E-165 |
| TEX13C     | 2.25E-169 | 2.607613552  | 0.051 | 0.005 | 4.81E-165 |
| SLCO3A1    | 3.10E-168 | -0.316300882 | 0.223 | 0.161 | 6.62E-164 |
| HSD17B11   | 1.46E-167 | -0.866617083 | 0.096 | 0.223 | 3.12E-163 |
| BX004987.1 | 9.67E-167 | 0.305537652  | 0.111 | 0.047 | 2.07E-162 |
| LIN7C      | 8.58E-166 | 0.455568651  | 0.295 | 0.168 | 1.83E-161 |
| FAM200B    | 8.99E-166 | 1.163932978  | 0.149 | 0.056 | 1.92E-161 |
| RAMMET     | 2.22E-165 | 0.474984495  | 0.326 | 0.19  | 4.73E-161 |
| CIAPIN1    | 2.88E-165 | 0.925415176  | 0.212 | 0.096 | 6.14E-161 |
| ELP3       | 5.24E-165 | 0.866752415  | 0.162 | 0.065 | 1.12E-160 |
| DIRAS2     | 6.72E-164 | -4.629068099 | 0.001 | 0.055 | 1.43E-159 |
| HPF1       | 7.20E-164 | 0.722795521  | 0.268 | 0.139 | 1.54E-159 |
| FAM96A     | 8.37E-164 | 0.336766074  | 0.426 | 0.28  | 1.79E-159 |
| NOB1       | 9.59E-164 | 0.260428175  | 0.329 | 0.204 | 2.05E-159 |



|            |           |              |       |       |           |
|------------|-----------|--------------|-------|-------|-----------|
| MYNN       | 1.73E-163 | 0.35538199   | 0.252 | 0.142 | 3.69E-159 |
| AGK        | 1.44E-162 | 0.910500019  | 0.154 | 0.061 | 3.08E-158 |
| DCXR       | 2.76E-162 | -0.585621364 | 0.363 | 0.361 | 5.90E-158 |
| MPV17      | 1.25E-161 | 0.679111144  | 0.235 | 0.119 | 2.67E-157 |
| AC109588.1 | 1.54E-161 | 1.723364868  | 0.055 | 0.008 | 3.29E-157 |
| ARF3       | 4.32E-161 | 0.608858456  | 0.259 | 0.139 | 9.23E-157 |
| NNT-AS1    | 3.38E-160 | 0.417362482  | 0.206 | 0.107 | 7.23E-156 |
| OSGIN2     | 8.34E-160 | 0.986521812  | 0.149 | 0.057 | 1.78E-155 |
| BDH2       | 3.85E-159 | 0.656994033  | 0.144 | 0.06  | 8.23E-155 |
| PTCH2      | 7.83E-159 | -1.703423067 | 0.085 | 0.175 | 1.67E-154 |
| KANK2      | 8.49E-159 | 1.270270356  | 0.069 | 0.015 | 1.81E-154 |
| MRPL44     | 8.75E-159 | 0.728092717  | 0.248 | 0.127 | 1.87E-154 |
| CENPN      | 1.34E-158 | 1.100162464  | 0.123 | 0.042 | 2.86E-154 |
| FNIP1      | 1.76E-158 | -0.453642353 | 0.329 | 0.277 | 3.75E-154 |
| GBP4       | 1.35E-157 | 0.725850105  | 0.13  | 0.049 | 2.88E-153 |
| SYPL1      | 3.43E-157 | 0.316516739  | 0.38  | 0.242 | 7.32E-153 |
| WASHC4     | 4.78E-157 | 0.752789602  | 0.306 | 0.171 | 1.02E-152 |
| AL139099.1 | 6.11E-157 | -2.857695343 | 0.061 | 0.116 | 1.31E-152 |
| USP39      | 7.03E-157 | 1.139177362  | 0.174 | 0.073 | 1.50E-152 |
| ISLR       | 8.39E-157 | -7.109377038 | 0.001 | 0.051 | 1.79E-152 |
| FASN       | 1.06E-156 | 0.299733337  | 0.12  | 0.051 | 2.27E-152 |
| CD33       | 2.98E-155 | 3.251457503  | 0.054 | 0.006 | 6.37E-151 |
| SMARCE1    | 5.50E-155 | 0.430813327  | 0.309 | 0.183 | 1.18E-150 |
| TROAP      | 8.26E-155 | 1.843016427  | 0.063 | 0.012 | 1.77E-150 |
| SLC16A14   | 1.04E-154 | 1.524765338  | 0.081 | 0.019 | 2.23E-150 |
| HMGCS1     | 1.15E-154 | 0.797313467  | 0.277 | 0.148 | 2.46E-150 |
| CENPS      | 1.33E-154 | 1.453943495  | 0.099 | 0.028 | 2.83E-150 |
| MRPL27     | 2.60E-154 | 0.397515714  | 0.352 | 0.219 | 5.54E-150 |
| ARHGAP4    | 6.22E-153 | -0.50625973  | 0.324 | 0.282 | 1.33E-148 |
| KMT2E-AS1  | 2.20E-152 | -1.480924046 | 0.127 | 0.222 | 4.70E-148 |
| SHC1       | 2.83E-152 | -0.66060915  | 0.317 | 0.31  | 6.05E-148 |
| ARL4C      | 5.17E-152 | 0.341665125  | 0.414 | 0.274 | 1.10E-147 |
| ITPR1      | 6.99E-152 | 0.832081696  | 0.099 | 0.033 | 1.49E-147 |
| AL391069.3 | 1.44E-151 | 1.968697793  | 0.058 | 0.009 | 3.08E-147 |
| POLD1      | 1.55E-151 | 0.409186556  | 0.098 | 0.037 | 3.30E-147 |
| PTPN18     | 3.61E-151 | 0.732420305  | 0.267 | 0.144 | 7.70E-147 |
| UBXN8      | 5.20E-151 | 0.610609095  | 0.137 | 0.056 | 1.11E-146 |
| SV2C       | 6.41E-151 | -2.002518057 | 0.008 | 0.064 | 1.37E-146 |
| CASP1      | 8.62E-151 | 0.292435966  | 0.104 | 0.187 | 1.84E-146 |
| SRP14-AS1  | 2.66E-150 | 0.935424535  | 0.147 | 0.059 | 5.67E-146 |
| PPIL3      | 2.86E-150 | 0.669036171  | 0.205 | 0.1   | 6.10E-146 |
| ARIH1      | 1.19E-149 | -0.397499869 | 0.41  | 0.349 | 2.53E-145 |
| VASH2      | 1.32E-149 | 2.375007384  | 0.052 | 0.006 | 2.82E-145 |
| SYNJ2BP    | 1.93E-149 | 0.690966561  | 0.181 | 0.083 | 4.12E-145 |
| ARL15      | 2.06E-149 | 1.618433519  | 0.065 | 0.012 | 4.40E-145 |
| RIN3       | 5.16E-149 | 0.327095043  | 0.011 | 0.056 | 1.10E-144 |
| MELK       | 2.28E-148 | 2.693173552  | 0.053 | 0.007 | 4.88E-144 |
| C16orf54   | 2.54E-148 | -1.29687247  | 0.151 | 0.255 | 5.42E-144 |
| C1orf56    | 2.78E-148 | -1.312334964 | 0.157 | 0.266 | 5.93E-144 |
| RALB       | 8.82E-148 | 1.591530575  | 0.134 | 0.047 | 1.88E-143 |

|            |           |              |       |       |           |
|------------|-----------|--------------|-------|-------|-----------|
| GGCX       | 1.60E-147 | 0.440524621  | 0.238 | 0.128 | 3.41E-143 |
| HACD3      | 3.04E-147 | 0.281258743  | 0.363 | 0.236 | 6.50E-143 |
| WDR92      | 7.38E-147 | 0.872115814  | 0.126 | 0.047 | 1.58E-142 |
| POP4       | 9.25E-147 | 0.5335257    | 0.322 | 0.19  | 1.98E-142 |
| TSFM       | 1.29E-145 | 0.773896837  | 0.232 | 0.118 | 2.76E-141 |
| CDK5RAP1   | 7.59E-145 | 0.456882518  | 0.177 | 0.086 | 1.62E-140 |
| PAAF1      | 8.52E-145 | 0.5985223    | 0.235 | 0.123 | 1.82E-140 |
| ARL2BP     | 3.14E-144 | 0.472118444  | 0.32  | 0.192 | 6.71E-140 |
| LYRM2      | 3.40E-144 | 0.273698381  | 0.349 | 0.226 | 7.26E-140 |
| ARID5A     | 1.10E-143 | -1.048312441 | 0.23  | 0.294 | 2.35E-139 |
| FGFR1OP    | 1.22E-143 | 1.050118939  | 0.132 | 0.05  | 2.60E-139 |
| METTL7A    | 1.48E-142 | -0.266729327 | 0.578 | 0.519 | 3.17E-138 |
| ID1        | 2.08E-142 | -0.926981631 | 0.253 | 0.275 | 4.45E-138 |
| TBC1D23    | 4.36E-142 | 0.618531913  | 0.246 | 0.132 | 9.32E-138 |
| RFC5       | 6.72E-142 | 1.104194609  | 0.107 | 0.035 | 1.43E-137 |
| AC084782.3 | 7.54E-142 | 2.9142379    | 0.041 | 0.003 | 1.61E-137 |
| NARS2      | 1.42E-141 | 0.827942702  | 0.136 | 0.056 | 3.02E-137 |
| AP3M1      | 3.28E-141 | 0.603264424  | 0.203 | 0.102 | 7.01E-137 |
| PRIM1      | 4.88E-141 | 0.875228541  | 0.174 | 0.078 | 1.04E-136 |
| EXOSC10    | 8.16E-141 | 0.414945011  | 0.185 | 0.094 | 1.74E-136 |
| SAXO2      | 1.78E-140 | 0.507409202  | 0.076 | 0.024 | 3.81E-136 |
| SSBP3      | 7.48E-140 | -1.452107257 | 0.091 | 0.186 | 1.60E-135 |
| LINC02506  | 8.37E-140 | 1.257649647  | 0.052 | 0.011 | 1.79E-135 |
| DROSHA     | 1.23E-139 | 0.651411471  | 0.132 | 0.054 | 2.62E-135 |
| INTS14     | 1.74E-139 | 0.730933238  | 0.167 | 0.075 | 3.73E-135 |
| BICD1      | 3.14E-139 | -0.304987142 | 0.302 | 0.233 | 6.71E-135 |
| PEX3       | 4.90E-138 | 0.870026789  | 0.17  | 0.076 | 1.05E-133 |
| ARMC1      | 1.75E-137 | 0.560011785  | 0.305 | 0.18  | 3.74E-133 |
| ABCF2.1    | 3.89E-137 | 0.526510067  | 0.194 | 0.098 | 8.30E-133 |
| BMP8B      | 2.43E-136 | -1.044465093 | 0.218 | 0.249 | 5.19E-132 |
| TGFBR2     | 2.47E-136 | 0.858625057  | 0.143 | 0.058 | 5.28E-132 |
| CDHR1      | 3.68E-136 | -3.783167263 | 0     | 0.043 | 7.86E-132 |
| ARNTL2     | 5.54E-136 | 4.050272217  | 0.041 | 0.003 | 1.18E-131 |
| GNL1       | 1.23E-135 | -0.301318693 | 0.37  | 0.299 | 2.62E-131 |
| METTL6     | 3.69E-135 | 0.878470357  | 0.167 | 0.075 | 7.88E-131 |
| CA13       | 1.94E-134 | 0.282977667  | 0.093 | 0.041 | 4.15E-130 |
| SLIT2      | 3.53E-134 | 1.927218572  | 0.048 | 0.007 | 7.53E-130 |
| SLC12A9    | 4.58E-134 | 0.306741195  | 0.146 | 0.074 | 9.79E-130 |
| TSPAN3     | 5.30E-134 | -0.743451786 | 0.328 | 0.35  | 1.13E-129 |
| SLC10A7    | 9.66E-134 | 0.457203378  | 0.198 | 0.103 | 2.06E-129 |
| SCN9A      | 2.54E-133 | 0.252576785  | 0.165 | 0.087 | 5.42E-129 |
| SCAMP1     | 5.18E-133 | 0.289081439  | 0.246 | 0.144 | 1.11E-128 |
| ZDHHC24    | 5.28E-133 | 0.266870779  | 0.292 | 0.181 | 1.13E-128 |
| E2F7       | 3.57E-132 | 1.51607586   | 0.053 | 0.01  | 7.63E-128 |
| FBXW9      | 7.52E-132 | 0.512613677  | 0.11  | 0.045 | 1.61E-127 |
| TIMM22     | 4.26E-131 | 0.723126263  | 0.188 | 0.092 | 9.10E-127 |
| AL441992.1 | 9.06E-131 | 0.92404528   | 0.116 | 0.044 | 1.93E-126 |
| TIPARP     | 1.02E-130 | -0.301460275 | 0.398 | 0.337 | 2.17E-126 |
| NCKAP1     | 1.07E-130 | -2.983578268 | 0.013 | 0.074 | 2.29E-126 |
| SMAD3      | 1.56E-130 | -2.017930744 | 0.034 | 0.109 | 3.34E-126 |

|               |           |              |       |       |           |
|---------------|-----------|--------------|-------|-------|-----------|
| FANCL         | 1.59E-130 | 0.989124337  | 0.123 | 0.047 | 3.39E-126 |
| P2RY11        | 4.63E-130 | 0.362041651  | 0.107 | 0.048 | 9.88E-126 |
| HADHB         | 5.15E-130 | 0.330882119  | 0.37  | 0.25  | 1.10E-125 |
| ANKRD36       | 1.44E-129 | -0.351609472 | 0.266 | 0.208 | 3.08E-125 |
| RGS16         | 2.10E-129 | 0.745766736  | 0.177 | 0.085 | 4.48E-125 |
| AP1S1         | 2.11E-129 | 0.564983219  | 0.262 | 0.15  | 4.50E-125 |
| P2RX5-TAX1BP3 | 2.71E-129 | 1.894722864  | 0.064 | 0.013 | 5.79E-125 |
| CD1D          | 4.85E-129 | -1.210531923 | 0.109 | 0.128 | 1.04E-124 |
| LGALS1        | 1.54E-128 | -0.307736502 | 0.455 | 0.465 | 3.28E-124 |
| ZNF90         | 1.56E-128 | 0.321647775  | 0.08  | 0.033 | 3.33E-124 |
| SPAG5         | 1.83E-128 | 1.289127444  | 0.063 | 0.014 | 3.91E-124 |
| RRM2B         | 6.70E-128 | 0.954303528  | 0.147 | 0.062 | 1.43E-123 |
| TTN-AS1       | 1.59E-127 | -0.26570996  | 0.087 | 0.049 | 3.39E-123 |
| ARF6          | 4.28E-127 | -0.386755667 | 0.362 | 0.374 | 9.13E-123 |
| AP002748.3    | 4.67E-126 | 1.154497134  | 0.098 | 0.032 | 9.97E-122 |
| DLST          | 7.50E-126 | 0.784237785  | 0.176 | 0.083 | 1.60E-121 |
| PBXIP1        | 8.83E-126 | -1.127597744 | 0.187 | 0.233 | 1.89E-121 |
| CADM2         | 2.26E-125 | -6.896708522 | 0     | 0.038 | 4.84E-121 |
| FGD2          | 2.46E-125 | -1.399779621 | 0.04  | 0.121 | 5.26E-121 |
| ERVMER61-1    | 2.60E-125 | 1.768972121  | 0.043 | 0.007 | 5.55E-121 |
| CFAP97        | 9.49E-125 | -0.283381836 | 0.376 | 0.323 | 2.03E-120 |
| CSNK1G3       | 1.07E-124 | -0.542677467 | 0.308 | 0.28  | 2.30E-120 |
| GTF2F1        | 1.11E-124 | -0.342732197 | 0.327 | 0.269 | 2.37E-120 |
| ASF1A         | 1.24E-124 | 0.806312452  | 0.187 | 0.091 | 2.65E-120 |
| MPHOSPH6      | 2.51E-124 | 0.825950815  | 0.149 | 0.067 | 5.37E-120 |
| TMEM64        | 2.88E-123 | 0.637529014  | 0.231 | 0.124 | 6.16E-119 |
| SMIM12        | 4.27E-123 | 0.499122402  | 0.246 | 0.14  | 9.13E-119 |
| SNRNP35       | 5.43E-123 | 0.432794419  | 0.181 | 0.098 | 1.16E-118 |
| PKNOX1        | 5.84E-123 | 0.63806744   | 0.181 | 0.091 | 1.25E-118 |
| TRMU          | 1.68E-122 | 0.29455292   | 0.143 | 0.073 | 3.58E-118 |
| SELPLG        | 1.73E-122 | -0.684908612 | 0.142 | 0.253 | 3.70E-118 |
| B4GALT7       | 2.15E-122 | -1.357837395 | 0.092 | 0.185 | 4.58E-118 |
| SLC30A9       | 2.32E-122 | 0.459795071  | 0.222 | 0.125 | 4.96E-118 |
| RPP25         | 1.15E-121 | -1.688982944 | 0.021 | 0.087 | 2.46E-117 |
| CLIC2         | 2.06E-121 | -1.20567701  | 0.027 | 0.094 | 4.41E-117 |
| SLC30A7       | 3.96E-121 | 0.294954946  | 0.282 | 0.177 | 8.45E-117 |
| PIGF          | 5.84E-121 | 0.376922275  | 0.28  | 0.173 | 1.25E-116 |
| ALAS1         | 1.47E-120 | 0.693922585  | 0.162 | 0.078 | 3.14E-116 |
| INTS4         | 1.81E-120 | 0.791989314  | 0.124 | 0.052 | 3.87E-116 |
| PLEKHA7       | 2.13E-120 | 0.631775306  | 0.133 | 0.058 | 4.56E-116 |
| CHMP5         | 2.16E-120 | 0.45573438   | 0.446 | 0.313 | 4.61E-116 |
| CBX5          | 1.14E-119 | 0.258152313  | 0.32  | 0.211 | 2.44E-115 |
| ABCD3         | 6.40E-119 | 0.559968118  | 0.136 | 0.065 | 1.37E-114 |
| AL133467.1    | 3.59E-118 | -2.036691884 | 0.028 | 0.098 | 7.66E-114 |
| C22orf39      | 7.68E-118 | 0.369240903  | 0.263 | 0.16  | 1.64E-113 |
| AC104024.1    | 7.75E-118 | -2.409397448 | 0.033 | 0.1   | 1.65E-113 |
| RARS2         | 1.36E-117 | 0.42910486   | 0.244 | 0.144 | 2.90E-113 |
| SAC3D1        | 2.16E-117 | 0.26149293   | 0.187 | 0.108 | 4.61E-113 |
| RANGAP1       | 2.29E-117 | 0.475695977  | 0.181 | 0.095 | 4.90E-113 |
| GNB5          | 1.24E-116 | -0.649105434 | 0.196 | 0.17  | 2.65E-112 |

|            |           |              |       |       |           |
|------------|-----------|--------------|-------|-------|-----------|
| STYXL1     | 2.29E-116 | 0.652896852  | 0.2   | 0.106 | 4.89E-112 |
| GRIP1      | 2.59E-116 | 0.463926894  | 0.079 | 0.031 | 5.54E-112 |
| SAP30BP    | 3.84E-116 | 0.329418777  | 0.307 | 0.199 | 8.20E-112 |
| RAB28      | 6.21E-116 | 0.658333805  | 0.164 | 0.08  | 1.33E-111 |
| SLC9A9     | 9.51E-116 | -2.192980825 | 0.019 | 0.08  | 2.03E-111 |
| GIT2       | 9.80E-116 | 0.319963046  | 0.189 | 0.107 | 2.09E-111 |
| WDR4       | 2.07E-115 | 0.289362629  | 0.131 | 0.066 | 4.43E-111 |
| PDHX       | 2.79E-115 | 0.569793826  | 0.137 | 0.064 | 5.96E-111 |
| MYO1B      | 2.85E-115 | -3.289723187 | 0.004 | 0.049 | 6.09E-111 |
| ALOX12-AS1 | 3.12E-115 | 0.908879893  | 0.102 | 0.037 | 6.66E-111 |
| VWDE       | 8.13E-115 | 0.288920797  | 0.052 | 0.018 | 1.74E-110 |
| PCNA       | 6.21E-114 | 0.918548488  | 0.248 | 0.14  | 1.33E-109 |
| KPNA5      | 1.61E-113 | 0.398489791  | 0.13  | 0.067 | 3.43E-109 |
| SEC23IP    | 1.76E-113 | 0.575773106  | 0.188 | 0.1   | 3.75E-109 |
| SNX18      | 3.54E-113 | -0.794969998 | 0.101 | 0.202 | 7.56E-109 |
| CNN2       | 4.09E-113 | -0.301559006 | 0.412 | 0.389 | 8.74E-109 |
| ANKRD18B   | 6.06E-113 | 4.260079394  | 0.031 | 0.002 | 1.29E-108 |
| TNFRSF10D  | 9.84E-113 | 1.043733533  | 0.09  | 0.031 | 2.10E-108 |
| PDK4       | 1.35E-112 | -1.585635039 | 0.002 | 0.035 | 2.88E-108 |
| ANLN       | 3.59E-112 | 1.704160244  | 0.045 | 0.008 | 7.67E-108 |
| AC132192.1 | 5.92E-112 | 1.146764508  | 0.042 | 0.008 | 1.26E-107 |
| AURKA      | 8.41E-112 | 1.830316785  | 0.057 | 0.013 | 1.80E-107 |
| CCDC15     | 1.43E-111 | 1.981154596  | 0.052 | 0.01  | 3.06E-107 |
| ADAMTS15   | 2.23E-111 | 0.647027198  | 0.042 | 0.01  | 4.76E-107 |
| MUT        | 1.26E-110 | 0.506566994  | 0.184 | 0.098 | 2.69E-106 |
| GBP3       | 1.34E-110 | -1.873075516 | 0.032 | 0.099 | 2.86E-106 |
| RSBN1L     | 2.15E-110 | -0.437951247 | 0.377 | 0.353 | 4.60E-106 |
| MTCH1      | 1.11E-109 | -0.686012376 | 0.275 | 0.316 | 2.38E-105 |
| IFT22      | 1.75E-109 | 1.163623099  | 0.078 | 0.025 | 3.73E-105 |
| RGS13      | 2.69E-109 | -4.288124745 | 0.008 | 0.046 | 5.74E-105 |
| KLHL24     | 7.21E-109 | -0.549806838 | 0.348 | 0.341 | 1.54E-104 |
| MTFR2      | 7.91E-109 | 1.857583693  | 0.049 | 0.009 | 1.69E-104 |
| BCAS2      | 8.07E-109 | -0.767614298 | 0.277 | 0.303 | 1.72E-104 |
| EFCAB7     | 1.92E-108 | 0.515469317  | 0.096 | 0.04  | 4.09E-104 |
| SQOR       | 2.03E-108 | 0.482535942  | 0.314 | 0.203 | 4.33E-104 |
| XRRA1      | 2.49E-108 | -1.022660317 | 0.187 | 0.237 | 5.32E-104 |
| RAB5A      | 2.96E-108 | 0.394264009  | 0.325 | 0.213 | 6.32E-104 |
| SLC25A37   | 5.00E-108 | -0.327788771 | 0.232 | 0.221 | 1.07E-103 |
| FBXO41     | 8.67E-108 | 0.566760663  | 0.087 | 0.034 | 1.85E-103 |
| MRPL45     | 1.63E-107 | 0.253627853  | 0.274 | 0.175 | 3.48E-103 |
| EIF4E      | 9.07E-107 | -1.042966335 | 0.222 | 0.297 | 1.94E-102 |
| SAMHD1     | 1.10E-106 | 1.26427067   | 0.211 | 0.115 | 2.36E-102 |
| STN1       | 1.27E-106 | 0.545315138  | 0.176 | 0.093 | 2.70E-102 |
| ACSF2      | 1.82E-106 | 1.157629051  | 0.058 | 0.015 | 3.89E-102 |
| CCDC141    | 6.42E-106 | 2.31371171   | 0.032 | 0.003 | 1.37E-101 |
| KIF20A     | 1.28E-105 | 2.093690288  | 0.034 | 0.004 | 2.74E-101 |
| C11orf54   | 2.11E-105 | 0.456352901  | 0.181 | 0.101 | 4.50E-101 |
| NEGR1      | 2.23E-105 | 4.088276994  | 0.025 | 0.001 | 4.76E-101 |
| DUSP26     | 3.67E-105 | -3.159885614 | 0.011 | 0.061 | 7.83E-101 |
| APTX       | 4.78E-105 | 0.37684666   | 0.219 | 0.132 | 1.02E-100 |

|            |           |              |       |       |           |
|------------|-----------|--------------|-------|-------|-----------|
| APOOL      | 6.31E-105 | 0.361332453  | 0.211 | 0.125 | 1.35E-100 |
| CHAF1B     | 9.79E-105 | 1.739200647  | 0.052 | 0.011 | 2.09E-100 |
| MT2A       | 1.14E-104 | 1.815782631  | 0.167 | 0.085 | 2.44E-100 |
| INTS7      | 1.47E-104 | 0.435609684  | 0.111 | 0.053 | 3.15E-100 |
| MRPS28     | 7.59E-104 | 0.795240631  | 0.173 | 0.088 | 1.62E-99  |
| LINC01287  | 8.23E-104 | 2.479423479  | 0.05  | 0.01  | 1.76E-99  |
| AASDH      | 2.24E-103 | 0.495883527  | 0.151 | 0.078 | 4.78E-99  |
| PRRG2      | 3.38E-103 | 0.311371874  | 0.068 | 0.027 | 7.22E-99  |
| NXT2       | 3.86E-103 | 0.724099527  | 0.122 | 0.054 | 8.24E-99  |
| RGPD2      | 4.72E-103 | -4.523270929 | 0.002 | 0.04  | 1.01E-98  |
| TSPYL2     | 1.26E-102 | -1.05738125  | 0.192 | 0.243 | 2.68E-98  |
| TST        | 1.48E-102 | 0.267279389  | 0.203 | 0.122 | 3.16E-98  |
| KIAA0586   | 3.15E-102 | -1.050496259 | 0.15  | 0.195 | 6.73E-98  |
| FUCA1      | 3.57E-102 | 0.457376332  | 0.163 | 0.089 | 7.61E-98  |
| MAP1A      | 4.06E-102 | 1.394061771  | 0.044 | 0.01  | 8.66E-98  |
| DHRS11     | 5.14E-102 | 0.334252556  | 0.135 | 0.069 | 1.10E-97  |
| SCAMP5     | 1.27E-101 | -0.924081449 | 0.15  | 0.149 | 2.70E-97  |
| CNTNAP1    | 1.49E-100 | 1.666192219  | 0.044 | 0.008 | 3.18E-96  |
| ARHGEF2    | 1.78E-100 | -0.80486538  | 0.231 | 0.271 | 3.80E-96  |
| RNF14      | 2.24E-100 | 0.276632426  | 0.176 | 0.102 | 4.78E-96  |
| AHI1       | 5.39E-100 | -1.203849105 | 0.157 | 0.184 | 1.15E-95  |
| SLC19A1    | 1.22E-99  | 0.568147104  | 0.08  | 0.033 | 2.60E-95  |
| AC008074.3 | 1.66E-99  | -1.865839527 | 0.048 | 0.111 | 3.54E-95  |
| TFB1M      | 2.50E-99  | 0.725513017  | 0.137 | 0.064 | 5.35E-95  |
| AC079630.1 | 1.33E-98  | -3.462498609 | 0.003 | 0.04  | 2.85E-94  |
| MXI1       | 1.54E-98  | -0.418953266 | 0.296 | 0.267 | 3.30E-94  |
| PBX2       | 3.17E-98  | -1.136396052 | 0.115 | 0.188 | 6.77E-94  |
| AC010343.3 | 7.56E-98  | 1.303420855  | 0.034 | 0.006 | 1.61E-93  |
| AL135791.1 | 1.16E-97  | -2.885813567 | 0.009 | 0.055 | 2.47E-93  |
| DYNC2H1    | 1.29E-97  | 1.425932051  | 0.039 | 0.007 | 2.76E-93  |
| AC005261.1 | 8.71E-97  | -0.272933272 | 0.443 | 0.398 | 1.86E-92  |
| FOXM1      | 1.25E-96  | 1.423635826  | 0.046 | 0.01  | 2.67E-92  |
| DBN1       | 1.29E-96  | 0.729192328  | 0.165 | 0.084 | 2.75E-92  |
| TRMT9B     | 1.30E-96  | -3.925776419 | 0.006 | 0.046 | 2.78E-92  |
| SPARC      | 3.31E-96  | 0.879209763  | 0.115 | 0.05  | 7.07E-92  |
| BCR        | 4.91E-96  | 0.264729728  | 0.151 | 0.084 | 1.05E-91  |
| PTMS       | 9.31E-96  | 0.336486584  | 0.22  | 0.136 | 1.99E-91  |
| B3GALNT1   | 9.33E-96  | 1.296936223  | 0.046 | 0.011 | 1.99E-91  |
| TTC5       | 2.84E-95  | 0.402173406  | 0.132 | 0.07  | 6.06E-91  |
| MOB3B      | 6.11E-95  | 1.822037765  | 0.036 | 0.006 | 1.31E-90  |
| AL451085.1 | 2.94E-94  | -2.262350573 | 0.03  | 0.082 | 6.29E-90  |
| TRIP4      | 3.23E-94  | 0.744308769  | 0.133 | 0.064 | 6.91E-90  |
| YPEL3      | 3.62E-94  | -0.466162306 | 0.33  | 0.388 | 7.74E-90  |
| FGFR1OP2   | 6.62E-94  | -0.740225687 | 0.252 | 0.313 | 1.41E-89  |
| MELTF-AS1  | 6.68E-94  | 0.540053293  | 0.049 | 0.016 | 1.43E-89  |
| PHOSPHO2   | 1.86E-93  | 0.367157758  | 0.075 | 0.032 | 3.97E-89  |
| PIAS4      | 2.69E-93  | 0.306502877  | 0.127 | 0.069 | 5.75E-89  |
| ETFRF1     | 2.75E-93  | -0.810495154 | 0.213 | 0.271 | 5.87E-89  |
| GGT1       | 3.77E-93  | 0.534563417  | 0.064 | 0.025 | 8.04E-89  |
| SUN1       | 4.47E-93  | -0.764122276 | 0.219 | 0.223 | 9.54E-89  |

|            |          |              |       |       |          |
|------------|----------|--------------|-------|-------|----------|
| RSU1       | 5.08E-93 | 0.491940683  | 0.251 | 0.157 | 1.08E-88 |
| HIC2       | 6.07E-93 | 0.285312827  | 0.09  | 0.043 | 1.30E-88 |
| A1BG       | 6.59E-93 | -1.225866279 | 0.058 | 0.133 | 1.41E-88 |
| TSIX       | 1.37E-92 | -5.056375028 | 0.001 | 0.033 | 2.92E-88 |
| CBX4       | 2.50E-92 | -0.679626279 | 0.234 | 0.247 | 5.34E-88 |
| SERINC1    | 3.42E-92 | -0.503599752 | 0.289 | 0.336 | 7.31E-88 |
| NUP85      | 4.00E-92 | 0.803423243  | 0.091 | 0.038 | 8.53E-88 |
| PSMD10     | 1.39E-91 | 0.471090034  | 0.21  | 0.122 | 2.98E-87 |
| TXNDC9     | 2.19E-91 | 0.475581356  | 0.24  | 0.148 | 4.67E-87 |
| CIT        | 3.64E-91 | 1.730693483  | 0.037 | 0.007 | 7.77E-87 |
| KCTD10     | 1.07E-90 | 0.746613685  | 0.09  | 0.036 | 2.28E-86 |
| GTF2H3     | 2.67E-90 | 0.666595546  | 0.201 | 0.115 | 5.70E-86 |
| WDSUB1     | 4.70E-90 | 0.933224082  | 0.083 | 0.032 | 1.00E-85 |
| ZC2HC1A    | 4.85E-90 | -0.900651647 | 0.033 | 0.092 | 1.04E-85 |
| UBE2Z      | 1.48E-89 | 0.31396253   | 0.265 | 0.175 | 3.16E-85 |
| PRKAB2     | 3.57E-89 | 0.341187134  | 0.094 | 0.046 | 7.63E-85 |
| TNIP1      | 4.85E-89 | -0.578271279 | 0.272 | 0.302 | 1.04E-84 |
| C11orf49   | 1.76E-88 | 0.415435133  | 0.107 | 0.053 | 3.75E-84 |
| XKR9       | 4.96E-88 | -1.85938902  | 0.019 | 0.07  | 1.06E-83 |
| ANXA1      | 4.48E-87 | 0.608538841  | 0.067 | 0.103 | 9.58E-83 |
| KCNMB3     | 1.42E-86 | -2.523739102 | 0.009 | 0.05  | 3.04E-82 |
| CYB5A      | 1.80E-86 | -1.158325656 | 0.073 | 0.144 | 3.85E-82 |
| BRMS1L     | 2.42E-86 | 0.637418469  | 0.108 | 0.05  | 5.17E-82 |
| ARHGAP5    | 2.58E-86 | -0.81009234  | 0.241 | 0.293 | 5.51E-82 |
| ZNF275     | 5.08E-86 | -0.923790795 | 0.178 | 0.226 | 1.09E-81 |
| LINC00865  | 7.14E-86 | 2.053654329  | 0.035 | 0.006 | 1.53E-81 |
| XPR1       | 1.17E-85 | -1.292113309 | 0.088 | 0.149 | 2.50E-81 |
| TNFRSF14   | 1.64E-85 | -0.657973829 | 0.267 | 0.323 | 3.49E-81 |
| RFWD3      | 2.18E-85 | 0.854882973  | 0.111 | 0.051 | 4.65E-81 |
| SNTB2      | 3.79E-85 | 1.060106778  | 0.079 | 0.029 | 8.10E-81 |
| TRIM35     | 5.49E-85 | 0.936706461  | 0.066 | 0.023 | 1.17E-80 |
| TMEM8B     | 1.26E-84 | 0.419688615  | 0.071 | 0.031 | 2.68E-80 |
| STEAP1B    | 1.91E-84 | 1.359894259  | 0.035 | 0.007 | 4.07E-80 |
| AC005726.5 | 2.69E-84 | 0.687387403  | 0.054 | 0.018 | 5.75E-80 |
| NR1D1      | 3.96E-84 | -1.729154414 | 0.051 | 0.102 | 8.45E-80 |
| ARL6       | 1.63E-83 | 1.161102838  | 0.045 | 0.011 | 3.47E-79 |
| GMPR       | 3.37E-83 | 0.852533024  | 0.066 | 0.027 | 7.20E-79 |
| AC005670.2 | 6.60E-83 | 1.283492521  | 0.039 | 0.009 | 1.41E-78 |
| PDLIM2     | 1.51E-82 | 1.479749247  | 0.056 | 0.017 | 3.23E-78 |
| CREM       | 3.93E-82 | 0.291428166  | 0.23  | 0.148 | 8.39E-78 |
| APOO       | 4.11E-82 | 0.571610116  | 0.124 | 0.062 | 8.79E-78 |
| JRK        | 6.31E-82 | 0.327524911  | 0.066 | 0.028 | 1.35E-77 |
| LRR1       | 1.44E-81 | 0.91501511   | 0.094 | 0.04  | 3.07E-77 |
| MRPL58     | 3.24E-81 | 0.611706603  | 0.235 | 0.146 | 6.91E-77 |
| MRM2       | 4.84E-81 | 0.696817996  | 0.146 | 0.078 | 1.03E-76 |
| GPAT3      | 6.86E-81 | -0.793274484 | 0.002 | 0.027 | 1.47E-76 |
| RAB3B      | 1.73E-80 | -3.555537591 | 0.006 | 0.04  | 3.70E-76 |
| HMGB1      | 3.04E-80 | 0.380163132  | 0.861 | 0.768 | 6.50E-76 |
| PEPD       | 4.29E-80 | 0.450117367  | 0.259 | 0.171 | 9.15E-76 |
| NUDT16     | 4.36E-80 | 0.594978901  | 0.216 | 0.135 | 9.31E-76 |

|            |          |              |       |       |          |
|------------|----------|--------------|-------|-------|----------|
| SEC22A     | 7.90E-80 | 0.566206674  | 0.107 | 0.051 | 1.69E-75 |
| KLHDC2     | 7.91E-80 | -0.636159667 | 0.263 | 0.274 | 1.69E-75 |
| SUCLA2     | 8.32E-80 | 0.551803433  | 0.129 | 0.067 | 1.78E-75 |
| ATF7       | 9.38E-80 | 0.374364532  | 0.159 | 0.094 | 2.00E-75 |
| TCN2       | 1.12E-79 | -0.647000955 | 0.014 | 0.055 | 2.39E-75 |
| SSPN       | 2.81E-79 | -1.720923662 | 0.038 | 0.095 | 6.00E-75 |
| CLP1       | 3.39E-79 | 1.027395693  | 0.078 | 0.03  | 7.25E-75 |
| DCLK1      | 3.44E-79 | 0.662640882  | 0.037 | 0.011 | 7.34E-75 |
| TMEM214    | 5.66E-79 | -0.508880187 | 0.28  | 0.272 | 1.21E-74 |
| ZBED5-AS1  | 6.84E-79 | 0.626575209  | 0.152 | 0.082 | 1.46E-74 |
| LAMP2      | 8.19E-79 | -0.375079636 | 0.301 | 0.313 | 1.75E-74 |
| ATP9B      | 8.56E-79 | -0.334277669 | 0.153 | 0.115 | 1.83E-74 |
| NOL4L      | 1.16E-78 | 0.648691111  | 0.075 | 0.03  | 2.48E-74 |
| TYW1       | 2.58E-78 | 0.380429192  | 0.169 | 0.101 | 5.50E-74 |
| CYP2J2     | 2.62E-78 | 0.272542338  | 0.054 | 0.023 | 5.61E-74 |
| PNPLA8     | 2.13E-77 | -0.285535866 | 0.35  | 0.322 | 4.54E-73 |
| BAG4       | 2.67E-77 | 0.58684068   | 0.154 | 0.086 | 5.70E-73 |
| LRIF1      | 3.15E-77 | -0.839554951 | 0.11  | 0.189 | 6.72E-73 |
| NFE2L2     | 1.63E-76 | -0.603293418 | 0.272 | 0.312 | 3.49E-72 |
| NR4A2      | 7.30E-76 | -0.494141535 | 0.351 | 0.384 | 1.56E-71 |
| ZMYM2      | 7.94E-76 | -0.411732024 | 0.188 | 0.168 | 1.70E-71 |
| CTNNA2     | 1.77E-75 | 1.601255931  | 0.028 | 0.005 | 3.77E-71 |
| AP000894.4 | 2.18E-75 | 0.560617213  | 0.041 | 0.014 | 4.67E-71 |
| UVSSA      | 8.57E-75 | -1.20206835  | 0.099 | 0.149 | 1.83E-70 |
| TTI2       | 8.80E-75 | 0.719159091  | 0.155 | 0.084 | 1.88E-70 |
| TRIM33     | 1.35E-74 | -0.844536593 | 0.185 | 0.222 | 2.89E-70 |
| BCL9       | 3.85E-74 | -0.778886798 | 0.086 | 0.079 | 8.22E-70 |
| CXCL8      | 4.19E-74 | 1.74532697   | 0.043 | 0.04  | 8.94E-70 |
| P4HA2      | 4.35E-74 | 0.778969351  | 0.142 | 0.074 | 9.29E-70 |
| ETHE1      | 6.43E-74 | 0.419572451  | 0.244 | 0.16  | 1.37E-69 |
| POLL       | 1.08E-73 | -1.506319251 | 0.055 | 0.11  | 2.30E-69 |
| ATG5       | 1.19E-73 | -0.28670941  | 0.29  | 0.253 | 2.55E-69 |
| AAR2       | 1.64E-73 | 0.76176525   | 0.096 | 0.044 | 3.50E-69 |
| RANBP6     | 1.69E-73 | -0.656105866 | 0.16  | 0.147 | 3.60E-69 |
| LEPROT     | 2.65E-73 | -0.325300252 | 0.325 | 0.333 | 5.66E-69 |
| RNF5       | 4.79E-73 | 0.27609703   | 0.232 | 0.161 | 1.02E-68 |
| KBTBD4     | 1.25E-72 | 0.449059821  | 0.085 | 0.041 | 2.67E-68 |
| FBXW4      | 1.29E-72 | -1.363781378 | 0.088 | 0.129 | 2.77E-68 |
| ATP6V1E1   | 2.62E-72 | 0.310224989  | 0.298 | 0.216 | 5.60E-68 |
| ZNF667-AS1 | 4.37E-72 | -6.122374494 | 0.001 | 0.025 | 9.33E-68 |
| MAATS1     | 5.03E-72 | 0.799611795  | 0.025 | 0.005 | 1.08E-67 |
| CIDEB      | 9.80E-72 | 0.730952784  | 0.068 | 0.028 | 2.09E-67 |
| TMC4       | 9.85E-72 | 0.281471126  | 0.047 | 0.02  | 2.10E-67 |
| THAP1      | 1.40E-71 | 0.403735517  | 0.21  | 0.133 | 2.98E-67 |
| CLUAP1     | 1.73E-71 | 0.296266303  | 0.099 | 0.051 | 3.70E-67 |
| MAN1C1     | 2.72E-71 | -2.253947043 | 0.013 | 0.053 | 5.81E-67 |
| SYNE3      | 4.66E-71 | -1.235126334 | 0.089 | 0.154 | 9.95E-67 |
| ZNF93      | 1.84E-70 | 1.070284684  | 0.042 | 0.012 | 3.92E-66 |
| EMSY       | 2.73E-70 | 0.48464859   | 0.141 | 0.08  | 5.84E-66 |
| PFN2       | 4.83E-70 | -1.518772448 | 0.021 | 0.067 | 1.03E-65 |

|            |          |              |       |       |          |
|------------|----------|--------------|-------|-------|----------|
| DIP2C      | 6.23E-70 | -5.500363904 | 0.001 | 0.024 | 1.33E-65 |
| CDC25C     | 1.07E-69 | 2.273983231  | 0.028 | 0.004 | 2.29E-65 |
| AC091563.1 | 1.66E-69 | -2.73319098  | 0.008 | 0.043 | 3.54E-65 |
| CD180      | 3.00E-69 | -0.810733678 | 0.076 | 0.083 | 6.41E-65 |
| NID2       | 3.06E-69 | 1.922705942  | 0.055 | 0.019 | 6.54E-65 |
| RELL2      | 4.83E-69 | 0.519816618  | 0.066 | 0.03  | 1.03E-64 |
| TCEAL4     | 1.27E-68 | -0.646129235 | 0.208 | 0.234 | 2.71E-64 |
| SLC25A45   | 1.49E-68 | -0.316265944 | 0.212 | 0.176 | 3.19E-64 |
| HIST1H2AG  | 4.03E-68 | -0.43770934  | 0.107 | 0.078 | 8.61E-64 |
| TDP2       | 6.07E-68 | 0.332267687  | 0.156 | 0.094 | 1.30E-63 |
| GOLM1      | 9.14E-68 | 0.278935764  | 0.124 | 0.07  | 1.95E-63 |
| SDHAF2     | 1.77E-67 | 0.500581406  | 0.207 | 0.132 | 3.78E-63 |
| ZSCAN16    | 1.82E-67 | 0.498153563  | 0.089 | 0.043 | 3.89E-63 |
| CCP110     | 2.16E-67 | 0.51507479   | 0.124 | 0.068 | 4.61E-63 |
| C8orf76    | 1.10E-66 | 0.53373941   | 0.154 | 0.088 | 2.35E-62 |
| TNRC6C     | 5.29E-66 | -0.680421522 | 0.086 | 0.075 | 1.13E-61 |
| CASP6      | 8.30E-66 | 0.495766672  | 0.134 | 0.075 | 1.77E-61 |
| DNAAF2     | 1.96E-65 | -0.749656753 | 0.169 | 0.18  | 4.18E-61 |
| DUSP8      | 2.82E-65 | -0.581913879 | 0.066 | 0.046 | 6.02E-61 |
| TTC26      | 4.23E-65 | 1.158949622  | 0.039 | 0.011 | 9.03E-61 |
| CLCN4      | 7.50E-65 | 1.419365805  | 0.062 | 0.022 | 1.60E-60 |
| NCOA7      | 1.51E-64 | -0.489051389 | 0.232 | 0.246 | 3.22E-60 |
| NSL1       | 2.06E-64 | 0.282201765  | 0.231 | 0.16  | 4.40E-60 |
| AL080276.2 | 2.14E-64 | 0.894204859  | 0.058 | 0.022 | 4.57E-60 |
| KIN        | 4.17E-64 | 0.298049719  | 0.172 | 0.112 | 8.90E-60 |
| AL450998.2 | 9.26E-64 | -0.504647403 | 0.109 | 0.091 | 1.98E-59 |
| AL591846.2 | 1.47E-63 | -1.021683858 | 0.066 | 0.062 | 3.14E-59 |
| GATAD2B    | 2.48E-63 | -0.42611449  | 0.216 | 0.204 | 5.30E-59 |
| AC025423.4 | 2.72E-63 | 2.671816912  | 0.024 | 0.003 | 5.80E-59 |
| P2RY8      | 2.94E-63 | -0.439113239 | 0.164 | 0.142 | 6.27E-59 |
| ZNF599     | 3.10E-63 | 0.612720286  | 0.055 | 0.022 | 6.62E-59 |
| GBP2       | 3.12E-63 | -1.045008058 | 0.014 | 0.051 | 6.67E-59 |
| AL121603.2 | 3.65E-63 | -1.178308718 | 0.088 | 0.125 | 7.80E-59 |
| TLR7       | 4.03E-63 | 2.744640318  | 0.037 | 0.014 | 8.62E-59 |
| CAMK2D     | 4.98E-63 | -0.863772569 | 0.126 | 0.145 | 1.06E-58 |
| AC099778.1 | 1.61E-62 | -0.538736654 | 0.154 | 0.137 | 3.44E-58 |
| MEPCE      | 2.94E-62 | -0.625079018 | 0.171 | 0.17  | 6.29E-58 |
| RNF34      | 3.52E-62 | 0.454316547  | 0.181 | 0.114 | 7.51E-58 |
| CISH       | 3.89E-62 | 0.478543679  | 0.098 | 0.054 | 8.32E-58 |
| CORO7      | 1.58E-61 | -0.57024629  | 0.207 | 0.208 | 3.38E-57 |
| ADGRA3     | 1.75E-61 | 0.898072326  | 0.093 | 0.044 | 3.73E-57 |
| SYDE2      | 1.76E-61 | 0.307714174  | 0.031 | 0.011 | 3.75E-57 |
| TLE1       | 4.14E-61 | -1.114972686 | 0.085 | 0.148 | 8.85E-57 |
| GPHN       | 5.80E-61 | -0.493821927 | 0.09  | 0.067 | 1.24E-56 |
| RAB26      | 5.91E-61 | 0.832607653  | 0.033 | 0.01  | 1.26E-56 |
| FAM118B    | 6.49E-61 | 0.874332698  | 0.083 | 0.038 | 1.39E-56 |
| PRDM8      | 1.22E-60 | -2.057412549 | 0.003 | 0.029 | 2.61E-56 |
| CMIP       | 1.41E-60 | 0.737700435  | 0.128 | 0.073 | 3.01E-56 |
| NUAK2      | 2.98E-60 | -1.216940441 | 0.059 | 0.094 | 6.37E-56 |
| TRIP11     | 7.02E-60 | -0.634451986 | 0.217 | 0.276 | 1.50E-55 |



|            |          |              |       |       |          |
|------------|----------|--------------|-------|-------|----------|
| ULK1       | 9.86E-60 | -0.314847034 | 0.122 | 0.092 | 2.11E-55 |
| USP13      | 1.12E-59 | 0.63478085   | 0.073 | 0.033 | 2.40E-55 |
| PPP1R3D    | 1.36E-59 | -1.431722044 | 0.022 | 0.063 | 2.91E-55 |
| RMI1       | 2.36E-59 | 0.895460982  | 0.08  | 0.037 | 5.03E-55 |
| CTBP1      | 2.65E-59 | -0.557642239 | 0.218 | 0.251 | 5.66E-55 |
| BABAM2     | 2.98E-59 | 0.278578239  | 0.15  | 0.097 | 6.37E-55 |
| FAM43A     | 3.65E-59 | -1.85960241  | 0.006 | 0.035 | 7.79E-55 |
| PAXX       | 6.38E-59 | -0.411903946 | 0.267 | 0.289 | 1.36E-54 |
| SLC16A6    | 8.82E-59 | 0.933292364  | 0.057 | 0.021 | 1.88E-54 |
| AAMDC      | 1.82E-58 | 0.324140758  | 0.192 | 0.129 | 3.88E-54 |
| NMNAT1     | 2.93E-58 | 0.74933297   | 0.066 | 0.029 | 6.25E-54 |
| MGAT4A     | 3.23E-58 | -1.036274114 | 0.024 | 0.067 | 6.89E-54 |
| CYSLTR1    | 4.90E-58 | -0.731639782 | 0.121 | 0.184 | 1.05E-53 |
| TLDC2      | 6.00E-58 | -3.700310208 | 0.001 | 0.022 | 1.28E-53 |
| ZSCAN18    | 7.16E-58 | -0.594119654 | 0.056 | 0.039 | 1.53E-53 |
| ZNF720     | 7.77E-58 | 0.335545546  | 0.127 | 0.078 | 1.66E-53 |
| AC004865.2 | 1.42E-57 | 0.527978225  | 0.058 | 0.025 | 3.04E-53 |
| NAGK       | 1.93E-57 | 0.598672697  | 0.228 | 0.153 | 4.13E-53 |
| HEXIM1     | 2.40E-57 | -0.866525515 | 0.161 | 0.187 | 5.13E-53 |
| CDK11A     | 2.59E-57 | -0.941549279 | 0.123 | 0.163 | 5.54E-53 |
| MIDN       | 7.16E-57 | -0.498446679 | 0.209 | 0.262 | 1.53E-52 |
| HSPH1      | 7.93E-57 | -0.251252973 | 0.291 | 0.264 | 1.69E-52 |
| HAR1B      | 9.87E-57 | -5.495773601 | 0     | 0.019 | 2.11E-52 |
| FAM193A    | 1.06E-56 | -0.317780907 | 0.134 | 0.108 | 2.27E-52 |
| ATG101     | 2.06E-56 | -0.542409148 | 0.229 | 0.245 | 4.40E-52 |
| RBM5-AS1   | 5.66E-56 | 1.224699084  | 0.032 | 0.008 | 1.21E-51 |
| ENTPD6     | 5.88E-56 | -1.213946453 | 0.043 | 0.091 | 1.26E-51 |
| PLEKHG7    | 8.88E-56 | 1.675356946  | 0.024 | 0.005 | 1.90E-51 |
| SMARCA11   | 1.00E-55 | 0.331472456  | 0.077 | 0.041 | 2.14E-51 |
| XYLT1      | 1.64E-55 | -0.829050799 | 0.022 | 0.059 | 3.51E-51 |
| WDR35      | 1.75E-55 | 0.408600498  | 0.045 | 0.019 | 3.73E-51 |
| MYLK-AS1   | 2.22E-55 | 0.859969242  | 0.037 | 0.013 | 4.74E-51 |
| CRB3       | 6.47E-55 | 0.464320207  | 0.041 | 0.017 | 1.38E-50 |
| EMC1       | 7.21E-55 | 0.301410374  | 0.153 | 0.1   | 1.54E-50 |
| NSMF       | 7.69E-55 | 0.479244766  | 0.05  | 0.023 | 1.64E-50 |
| STAP1      | 1.19E-54 | -1.086607419 | 0.075 | 0.078 | 2.54E-50 |
| CIC        | 1.28E-54 | -0.372648031 | 0.155 | 0.132 | 2.73E-50 |
| SLC25A15   | 1.47E-54 | 1.7872003    | 0.024 | 0.005 | 3.14E-50 |
| SOS1       | 1.58E-54 | -0.646753222 | 0.184 | 0.197 | 3.38E-50 |
| DCTD       | 1.87E-54 | -0.736580394 | 0.169 | 0.213 | 4.00E-50 |
| TCEAL9     | 4.64E-54 | -1.187320406 | 0.017 | 0.053 | 9.92E-50 |
| AL035563.1 | 4.79E-54 | -1.679906532 | 0.024 | 0.062 | 1.02E-49 |
| STAM-AS1   | 1.66E-53 | -0.752358647 | 0.043 | 0.03  | 3.55E-49 |
| LINC01374  | 1.86E-53 | 1.201142076  | 0.026 | 0.006 | 3.97E-49 |
| BEX4       | 1.86E-53 | -0.903978387 | 0.062 | 0.113 | 3.97E-49 |
| ZDHHC4     | 1.99E-53 | -0.262983995 | 0.196 | 0.164 | 4.25E-49 |
| LEMD3      | 2.21E-53 | -0.319875526 | 0.186 | 0.157 | 4.72E-49 |
| SLC37A1    | 6.19E-53 | -0.420252885 | 0.076 | 0.057 | 1.32E-48 |
| PKP2       | 6.87E-53 | 0.370424157  | 0.163 | 0.104 | 1.47E-48 |
| CRIP1      | 9.15E-53 | 0.912976198  | 0.05  | 0.019 | 1.95E-48 |

|            |          |              |       |       |          |
|------------|----------|--------------|-------|-------|----------|
| MED27      | 3.28E-52 | 0.26699022   | 0.157 | 0.101 | 7.02E-48 |
| POU5F2     | 5.20E-52 | -0.702980361 | 0.048 | 0.035 | 1.11E-47 |
| LINC00685  | 5.54E-52 | -1.968020396 | 0.024 | 0.056 | 1.18E-47 |
| PARD6G-AS1 | 7.91E-52 | -0.750290237 | 0.035 | 0.021 | 1.69E-47 |
| NAV2       | 2.26E-51 | -2.26215705  | 0.01  | 0.04  | 4.82E-47 |
| GRIA3      | 2.80E-51 | -7.2379963   | 0     | 0.015 | 5.97E-47 |
| ZFAND2B    | 6.07E-51 | -0.703619351 | 0.158 | 0.184 | 1.30E-46 |
| RGS2       | 8.16E-51 | -0.601916592 | 0.251 | 0.288 | 1.74E-46 |
| IFT88      | 1.29E-50 | 0.581878263  | 0.064 | 0.031 | 2.76E-46 |
| AC083798.2 | 1.55E-50 | 0.403451789  | 0.07  | 0.037 | 3.30E-46 |
| KIF19      | 1.63E-50 | -0.682256997 | 0.051 | 0.042 | 3.48E-46 |
| TRIT1      | 2.25E-50 | 0.594056924  | 0.101 | 0.056 | 4.81E-46 |
| ARG2       | 3.05E-50 | 0.756989677  | 0.039 | 0.014 | 6.52E-46 |
| AC104653.1 | 6.86E-50 | 1.033210306  | 0.024 | 0.006 | 1.47E-45 |
| MYO5B      | 9.42E-50 | 0.533097751  | 0.119 | 0.068 | 2.01E-45 |
| RNF144B    | 1.16E-49 | 0.681272897  | 0.008 | 0.023 | 2.49E-45 |
| KHDRBS2    | 1.46E-49 | -1.772539397 | 0.028 | 0.04  | 3.12E-45 |
| CCDC80     | 1.49E-49 | 1.926455174  | 0.022 | 0.004 | 3.18E-45 |
| PRR3       | 2.17E-49 | -0.700021454 | 0.097 | 0.086 | 4.64E-45 |
| ZNF83      | 2.74E-49 | -1.342798551 | 0.027 | 0.066 | 5.85E-45 |
| FAM102A    | 3.63E-49 | 0.363838358  | 0.117 | 0.071 | 7.76E-45 |
| RIMS1      | 3.66E-49 | -7.010767045 | 0     | 0.014 | 7.83E-45 |
| C3orf70    | 4.95E-49 | -1.500112698 | 0.028 | 0.068 | 1.06E-44 |
| HOMER1     | 7.72E-49 | -0.766265678 | 0.059 | 0.05  | 1.65E-44 |
| IQSEC1     | 8.88E-49 | -0.676724714 | 0.121 | 0.132 | 1.90E-44 |
| AC026979.2 | 1.12E-48 | -0.960292549 | 0.064 | 0.071 | 2.40E-44 |
| VPS13D     | 1.35E-48 | -0.595593681 | 0.093 | 0.086 | 2.88E-44 |
| ZNF667     | 4.30E-48 | -3.931634979 | 0.001 | 0.018 | 9.18E-44 |
| ZFYVE28    | 5.06E-48 | 0.786543151  | 0.054 | 0.024 | 1.08E-43 |
| THUMPD2    | 9.67E-48 | -0.582632172 | 0.101 | 0.094 | 2.07E-43 |
| BHLHB9     | 1.46E-47 | 0.870476548  | 0.025 | 0.008 | 3.12E-43 |
| ARHGAP6    | 1.58E-47 | -2.793765872 | 0.004 | 0.026 | 3.37E-43 |
| ELAC1      | 1.62E-47 | 0.272302714  | 0.135 | 0.086 | 3.46E-43 |
| ECHDC2     | 1.84E-47 | -1.086102043 | 0.075 | 0.085 | 3.92E-43 |
| TNC        | 2.95E-47 | -2.093405729 | 0     | 0.014 | 6.31E-43 |
| AP001059.2 | 3.91E-47 | 2.53392521   | 0.014 | 0.001 | 8.35E-43 |
| RBM4B      | 4.36E-47 | 0.323477866  | 0.095 | 0.055 | 9.32E-43 |
| EDIL3      | 4.48E-47 | 0.325709867  | 0.022 | 0.008 | 9.56E-43 |
| RAB11FIP2  | 4.87E-47 | -0.729306074 | 0.111 | 0.129 | 1.04E-42 |
| TM2D2      | 7.36E-47 | 0.327903134  | 0.187 | 0.129 | 1.57E-42 |
| ELOA-AS1   | 9.67E-47 | 0.622077531  | 0.094 | 0.051 | 2.07E-42 |
| AC013394.1 | 1.18E-46 | -0.304773993 | 0.118 | 0.091 | 2.52E-42 |
| OASL       | 1.62E-46 | -0.684575703 | 0.023 | 0.058 | 3.46E-42 |
| AC087623.3 | 1.77E-46 | -1.115300576 | 0.075 | 0.092 | 3.78E-42 |
| CCDC115    | 2.45E-46 | 0.260044458  | 0.147 | 0.098 | 5.24E-42 |
| GCHFR      | 4.34E-46 | -0.674180248 | 0.11  | 0.162 | 9.27E-42 |
| CCM2       | 6.38E-46 | -0.362531333 | 0.224 | 0.212 | 1.36E-41 |
| GSN        | 1.41E-45 | 2.115799411  | 0.037 | 0.012 | 3.01E-41 |
| RHOC       | 3.88E-45 | -0.283392759 | 0.2   | 0.183 | 8.28E-41 |
| CDK7       | 5.27E-45 | 0.440429609  | 0.099 | 0.056 | 1.13E-40 |

|            |          |              |       |       |          |
|------------|----------|--------------|-------|-------|----------|
| TBXAS1     | 5.79E-45 | -0.443369748 | 0.087 | 0.143 | 1.24E-40 |
| CFAP54     | 1.24E-44 | -0.616451847 | 0.038 | 0.074 | 2.64E-40 |
| NAT14      | 3.36E-44 | 0.302322917  | 0.043 | 0.02  | 7.17E-40 |
| AC006449.6 | 3.68E-44 | -0.733162621 | 0.107 | 0.115 | 7.86E-40 |
| WDPCP      | 7.72E-44 | -0.38518247  | 0.076 | 0.058 | 1.65E-39 |
| ARSD       | 8.15E-44 | -0.558397258 | 0.007 | 0.026 | 1.74E-39 |
| MID1       | 8.91E-44 | 1.994171913  | 0.016 | 0.002 | 1.90E-39 |
| GATA3      | 1.66E-43 | 1.387247794  | 0.02  | 0.004 | 3.54E-39 |
| AL645728.1 | 2.42E-43 | -0.702100594 | 0.061 | 0.057 | 5.17E-39 |
| STX11      | 2.45E-43 | -0.448804856 | 0.087 | 0.14  | 5.23E-39 |
| PIK3CA     | 4.73E-43 | -0.601640048 | 0.13  | 0.131 | 1.01E-38 |
| PTPDC1     | 6.11E-43 | 0.318941296  | 0.029 | 0.012 | 1.30E-38 |
| FILIP1L    | 7.80E-43 | 1.153087575  | 0.015 | 0.002 | 1.67E-38 |
| NR4A3      | 9.03E-43 | 0.778526319  | 0.043 | 0.018 | 1.93E-38 |
| EGLN1      | 1.20E-42 | -0.275692336 | 0.193 | 0.167 | 2.55E-38 |
| PANX2      | 1.84E-42 | -6.52939948  | 0     | 0.012 | 3.92E-38 |
| FAAH2      | 2.06E-42 | -0.557593779 | 0.045 | 0.034 | 4.41E-38 |
| CALCOCO2   | 2.93E-42 | -0.323735713 | 0.25  | 0.259 | 6.25E-38 |
| MAP2K1     | 3.62E-42 | 0.304437323  | 0.218 | 0.16  | 7.74E-38 |
| ARF5       | 3.66E-42 | 0.523709081  | 0.167 | 0.113 | 7.82E-38 |
| ATRNL1     | 5.20E-42 | -1.227363141 | 0.026 | 0.023 | 1.11E-37 |
| AC093772.1 | 9.59E-42 | 1.552752299  | 0.031 | 0.009 | 2.05E-37 |
| AC099518.5 | 1.87E-41 | -1.460376048 | 0.001 | 0.013 | 4.00E-37 |
| ISPD       | 2.25E-41 | -4.927291889 | 0     | 0.015 | 4.80E-37 |
| EME1       | 2.43E-41 | 1.424905039  | 0.022 | 0.005 | 5.19E-37 |
| CPAMD8     | 2.53E-41 | -1.83655675  | 0.004 | 0.025 | 5.39E-37 |
| AC116366.1 | 4.58E-41 | -0.758022644 | 0.141 | 0.19  | 9.79E-37 |
| SPECC1     | 5.54E-41 | 0.874966473  | 0.147 | 0.094 | 1.18E-36 |
| CSTB       | 7.71E-41 | 0.521091381  | 0.436 | 0.364 | 1.65E-36 |
| OR2A1-AS1  | 1.18E-40 | 1.355622171  | 0.022 | 0.005 | 2.53E-36 |
| ACTR8      | 1.55E-40 | 0.313031036  | 0.102 | 0.062 | 3.30E-36 |
| TCEAL2     | 1.82E-40 | -7.519542217 | 0     | 0.012 | 3.89E-36 |
| PIGK       | 2.49E-40 | -0.636806793 | 0.163 | 0.173 | 5.32E-36 |
| CCDC51     | 2.85E-40 | 0.675284982  | 0.091 | 0.051 | 6.08E-36 |
| MED15      | 5.28E-40 | 0.318360278  | 0.103 | 0.068 | 1.13E-35 |
| MAGI2      | 7.00E-40 | -2.625585389 | 0.011 | 0.033 | 1.50E-35 |
| HYLS1      | 7.40E-40 | 0.62062617   | 0.055 | 0.026 | 1.58E-35 |
| ZNF236     | 1.02E-39 | -0.314595609 | 0.073 | 0.055 | 2.18E-35 |
| PRKACB     | 2.16E-39 | -0.6568928   | 0.136 | 0.169 | 4.61E-35 |
| AC073389.1 | 2.37E-39 | -0.907098358 | 0.049 | 0.048 | 5.06E-35 |
| PAN3       | 2.65E-39 | -0.320920488 | 0.139 | 0.131 | 5.67E-35 |
| INO80E     | 2.98E-39 | -0.342401562 | 0.138 | 0.122 | 6.36E-35 |
| RGS5.1     | 3.86E-39 | 0.522256743  | 0.036 | 0.016 | 8.24E-35 |
| LINC00909  | 4.19E-39 | -0.5141059   | 0.128 | 0.132 | 8.96E-35 |
| PEX13      | 5.39E-39 | 0.402709387  | 0.125 | 0.079 | 1.15E-34 |
| MB21D2     | 6.33E-39 | 0.802207082  | 0.078 | 0.041 | 1.35E-34 |
| GSTA4      | 6.72E-39 | -1.984165861 | 0.008 | 0.031 | 1.44E-34 |
| MICALL1    | 1.11E-38 | 0.311750475  | 0.044 | 0.022 | 2.37E-34 |
| TUBB       | 1.18E-38 | 0.590637256  | 0.501 | 0.435 | 2.51E-34 |
| F8A3       | 1.27E-38 | 0.851188809  | 0.07  | 0.035 | 2.72E-34 |

|            |          |              |       |       |          |
|------------|----------|--------------|-------|-------|----------|
| ARHGEF37   | 2.99E-38 | -1.730521971 | 0.025 | 0.05  | 6.38E-34 |
| PHLDB2     | 3.94E-38 | -2.287730838 | 0.007 | 0.029 | 8.41E-34 |
| BCL2L10    | 5.26E-38 | 1.006337074  | 0.017 | 0.004 | 1.12E-33 |
| ZNF625     | 8.82E-38 | 0.966933587  | 0.028 | 0.009 | 1.88E-33 |
| CCR2       | 9.05E-38 | -0.574336839 | 0.046 | 0.087 | 1.93E-33 |
| TMBIM1     | 1.28E-37 | -0.603069472 | 0.116 | 0.161 | 2.73E-33 |
| TUBA1B     | 1.44E-37 | 0.659132995  | 0.594 | 0.519 | 3.08E-33 |
| TMEM74B    | 2.96E-37 | -4.557758864 | 0.002 | 0.016 | 6.32E-33 |
| ATP10D     | 2.97E-37 | -0.524239065 | 0.039 | 0.077 | 6.35E-33 |
| ZNF880     | 3.04E-37 | -1.389084739 | 0.023 | 0.05  | 6.49E-33 |
| CYB5R3     | 3.16E-37 | -0.599974791 | 0.111 | 0.154 | 6.74E-33 |
| KLHL28     | 6.77E-37 | -0.635463933 | 0.064 | 0.109 | 1.45E-32 |
| C14orf119  | 9.15E-37 | 0.360209923  | 0.198 | 0.142 | 1.95E-32 |
| USP54      | 9.78E-37 | 0.312857009  | 0.027 | 0.011 | 2.09E-32 |
| NLGN4X     | 1.42E-36 | -1.719207371 | 0.017 | 0.045 | 3.02E-32 |
| DSTYK      | 2.28E-36 | -0.549674682 | 0.096 | 0.104 | 4.88E-32 |
| AMN        | 2.89E-36 | -4.193408112 | 0.001 | 0.015 | 6.16E-32 |
| DRAM2      | 3.89E-36 | -0.557821707 | 0.16  | 0.179 | 8.30E-32 |
| GON7       | 4.36E-36 | 0.389144744  | 0.164 | 0.113 | 9.31E-32 |
| AC004816.1 | 4.67E-36 | 1.620605243  | 0.021 | 0.005 | 9.98E-32 |
| ZBTB16     | 5.63E-36 | -1.375071287 | 0.003 | 0.019 | 1.20E-31 |
| NOVA1      | 1.55E-35 | -7.494176142 | 0     | 0.01  | 3.31E-31 |
| ARFGEF2    | 1.58E-35 | -0.624141537 | 0.144 | 0.181 | 3.37E-31 |
| CCDC28B    | 2.84E-35 | 0.80554635   | 0.038 | 0.016 | 6.06E-31 |
| CCDC171    | 3.97E-35 | 0.35863065   | 0.023 | 0.01  | 8.48E-31 |
| MYL5       | 4.88E-35 | -1.038843673 | 0.038 | 0.073 | 1.04E-30 |
| PDGFC      | 6.10E-35 | -1.015587941 | 0.003 | 0.019 | 1.30E-30 |
| CCNE2      | 7.19E-35 | -0.321877566 | 0.052 | 0.036 | 1.54E-30 |
| MPPE1      | 9.01E-35 | -0.308069291 | 0.148 | 0.14  | 1.92E-30 |
| ABCD2      | 9.41E-35 | -0.339182077 | 0.086 | 0.07  | 2.01E-30 |
| ZNF274     | 9.98E-35 | -0.386195491 | 0.128 | 0.112 | 2.13E-30 |
| GREB1      | 1.17E-34 | -3.846689194 | 0.003 | 0.018 | 2.50E-30 |
| PRICKLE2   | 1.27E-34 | -1.013606099 | 0.051 | 0.055 | 2.71E-30 |
| FAT4       | 1.36E-34 | -3.157107191 | 0.003 | 0.019 | 2.90E-30 |
| TMUB2      | 1.37E-34 | -0.484597649 | 0.135 | 0.144 | 2.92E-30 |
| ZNF284     | 1.59E-34 | 0.795839038  | 0.014 | 0.003 | 3.39E-30 |
| AC245140.2 | 1.65E-34 | -0.702826835 | 0.044 | 0.034 | 3.53E-30 |
| ARHGAP33   | 1.79E-34 | 0.30846063   | 0.025 | 0.011 | 3.82E-30 |
| FAM213A    | 2.25E-34 | -0.445802096 | 0.107 | 0.101 | 4.80E-30 |
| FAM174B    | 2.48E-34 | -0.655304613 | 0.04  | 0.032 | 5.30E-30 |
| CDK17      | 4.03E-34 | -0.787810638 | 0.112 | 0.132 | 8.61E-30 |
| ATF1       | 7.96E-34 | 0.254153508  | 0.162 | 0.12  | 1.70E-29 |
| BAG3       | 8.11E-34 | -0.377626995 | 0.098 | 0.082 | 1.73E-29 |
| AL359232.1 | 9.85E-34 | 0.384158598  | 0.032 | 0.014 | 2.10E-29 |
| CTNS       | 1.11E-33 | 0.701644248  | 0.067 | 0.036 | 2.37E-29 |
| CDKL5      | 1.23E-33 | 0.287491575  | 0.081 | 0.048 | 2.62E-29 |
| AC092053.2 | 1.51E-33 | -1.576353561 | 0.016 | 0.039 | 3.22E-29 |
| AC024257.3 | 1.84E-33 | -1.54770569  | 0.016 | 0.038 | 3.93E-29 |
| ZNF540     | 3.21E-33 | -3.204557804 | 0.002 | 0.015 | 6.85E-29 |
| SPON2      | 4.54E-33 | -0.584898576 | 0.019 | 0.045 | 9.69E-29 |

|            |          |              |       |       |          |
|------------|----------|--------------|-------|-------|----------|
| MYADM      | 4.80E-33 | -0.625434386 | 0.122 | 0.167 | 1.03E-28 |
| SIK1B      | 8.79E-33 | -0.722492923 | 0.035 | 0.024 | 1.88E-28 |
| PHF12      | 9.05E-33 | -0.396470732 | 0.128 | 0.116 | 1.93E-28 |
| AC243964.2 | 1.02E-32 | 0.985113221  | 0.02  | 0.006 | 2.17E-28 |
| AL365259.1 | 1.06E-32 | 1.098070068  | 0.015 | 0.004 | 2.26E-28 |
| APEX2      | 1.84E-32 | 0.381735332  | 0.063 | 0.038 | 3.92E-28 |
| SPAG16     | 2.33E-32 | 0.253871435  | 0.101 | 0.067 | 4.97E-28 |
| COCH       | 3.15E-32 | -0.437553294 | 0.057 | 0.046 | 6.73E-28 |
| BANP       | 3.39E-32 | -0.471443994 | 0.08  | 0.072 | 7.25E-28 |
| SPINK5     | 4.07E-32 | 2.513360262  | 0.025 | 0.01  | 8.70E-28 |
| AC009318.1 | 5.13E-32 | 0.860214542  | 0.019 | 0.006 | 1.09E-27 |
| APOF       | 5.21E-32 | -3.779736689 | 0.002 | 0.016 | 1.11E-27 |
| THRIL      | 7.58E-32 | 1.571839624  | 0.016 | 0.004 | 1.62E-27 |
| WNT10A     | 8.24E-32 | -0.930773276 | 0.058 | 0.082 | 1.76E-27 |
| RTN4IP1    | 1.26E-31 | 0.490049362  | 0.042 | 0.021 | 2.70E-27 |
| LINC01686  | 1.41E-31 | 0.912819478  | 0.018 | 0.005 | 3.02E-27 |
| AP001107.1 | 1.81E-31 | 0.80631627   | 0.016 | 0.004 | 3.86E-27 |
| ZNF460     | 1.95E-31 | -0.556054441 | 0.153 | 0.155 | 4.16E-27 |
| CENPI      | 2.10E-31 | 1.477204705  | 0.015 | 0.003 | 4.48E-27 |
| HIST1H4A   | 2.38E-31 | -2.069273502 | 0.011 | 0.029 | 5.08E-27 |
| CAPN10-DT  | 2.50E-31 | -1.667611555 | 0.026 | 0.048 | 5.35E-27 |
| MFSD11     | 5.38E-31 | -0.610941095 | 0.141 | 0.153 | 1.15E-26 |
| SEC11C     | 6.27E-31 | -0.282711963 | 0.875 | 0.845 | 1.34E-26 |
| AC084018.2 | 9.29E-31 | -0.409739281 | 0.046 | 0.035 | 1.98E-26 |
| AL158152.1 | 1.30E-30 | -0.517459623 | 0.054 | 0.045 | 2.78E-26 |
| AGO4       | 1.71E-30 | -0.875310215 | 0.035 | 0.063 | 3.65E-26 |
| RGPD5      | 1.81E-30 | -0.740435409 | 0.123 | 0.145 | 3.87E-26 |
| AC092803.2 | 2.10E-30 | -1.277564346 | 0.024 | 0.034 | 4.49E-26 |
| ZNF17      | 3.58E-30 | 0.564620071  | 0.04  | 0.019 | 7.64E-26 |
| AC022098.4 | 4.63E-30 | -1.075657178 | 0.027 | 0.027 | 9.88E-26 |
| LINC01967  | 6.99E-30 | 0.442445641  | 0.023 | 0.01  | 1.49E-25 |
| TUBGCP5    | 8.23E-30 | -0.839307551 | 0.079 | 0.101 | 1.76E-25 |
| PIBF1      | 8.52E-30 | -0.386187195 | 0.096 | 0.086 | 1.82E-25 |
| NME7       | 1.31E-29 | -0.342373301 | 0.083 | 0.07  | 2.79E-25 |
| AC009133.1 | 2.35E-29 | -0.491328922 | 0.059 | 0.05  | 5.02E-25 |
| HELZ2      | 3.02E-29 | -0.606855095 | 0.074 | 0.075 | 6.45E-25 |
| LINC02413  | 3.07E-29 | 1.123089825  | 0.015 | 0.004 | 6.57E-25 |
| NRG1       | 3.29E-29 | -4.948711808 | 0     | 0.011 | 7.03E-25 |
| PAPOLG     | 5.89E-29 | 0.366352507  | 0.099 | 0.065 | 1.26E-24 |
| APOBEC3F   | 7.33E-29 | 0.658999765  | 0.047 | 0.024 | 1.56E-24 |
| RDH5       | 7.39E-29 | 1.362576604  | 0.021 | 0.007 | 1.58E-24 |
| WNT5B      | 1.25E-28 | -0.964123217 | 0.07  | 0.099 | 2.67E-24 |
| CGRRF1     | 1.31E-28 | -0.739024795 | 0.085 | 0.126 | 2.80E-24 |
| CD69       | 2.02E-28 | 0.934448434  | 0.205 | 0.167 | 4.32E-24 |
| AL031316.1 | 2.61E-28 | 1.873479008  | 0.019 | 0.005 | 5.57E-24 |
| AC243829.4 | 3.63E-28 | -0.897110655 | 0.012 | 0.032 | 7.76E-24 |
| NKILA      | 3.82E-28 | -2.112758349 | 0.005 | 0.021 | 8.16E-24 |
| RIDA       | 3.90E-28 | 0.421220042  | 0.136 | 0.095 | 8.34E-24 |
| AC040970.1 | 3.94E-28 | 0.391646368  | 0.114 | 0.076 | 8.42E-24 |
| TCEAL8     | 5.49E-28 | -0.319228032 | 0.189 | 0.191 | 1.17E-23 |

|            |          |              |       |       |          |
|------------|----------|--------------|-------|-------|----------|
| SNX22      | 1.24E-27 | 0.288509044  | 0.039 | 0.02  | 2.64E-23 |
| CSTF2      | 1.68E-27 | 0.627544306  | 0.044 | 0.023 | 3.59E-23 |
| SPAST      | 1.98E-27 | -0.61092024  | 0.094 | 0.108 | 4.22E-23 |
| ZNF180     | 3.43E-27 | 0.327097717  | 0.033 | 0.017 | 7.33E-23 |
| ST7L       | 3.68E-27 | -0.805712236 | 0.07  | 0.095 | 7.85E-23 |
| MSANTD4    | 4.05E-27 | 0.355925674  | 0.087 | 0.056 | 8.65E-23 |
| HOXB7      | 9.32E-27 | 0.353872048  | 0.026 | 0.013 | 1.99E-22 |
| AC006480.2 | 1.06E-26 | -0.702544821 | 0.033 | 0.026 | 2.26E-22 |
| NBPF26     | 1.70E-26 | 0.290363598  | 0.016 | 0.005 | 3.63E-22 |
| NDST1      | 1.89E-26 | 0.5663282    | 0.029 | 0.014 | 4.03E-22 |
| C20orf96   | 2.40E-26 | -0.339429623 | 0.041 | 0.031 | 5.12E-22 |
| FCRLA      | 2.58E-26 | -0.592745583 | 0.176 | 0.191 | 5.50E-22 |
| AGPAT2     | 3.53E-26 | -0.65579135  | 0.091 | 0.129 | 7.54E-22 |
| RBBP9      | 5.38E-26 | 0.711270947  | 0.04  | 0.02  | 1.15E-21 |
| GTF2E1     | 5.76E-26 | 0.448656683  | 0.079 | 0.05  | 1.23E-21 |
| PHLPP2     | 8.27E-26 | -0.750843395 | 0.046 | 0.048 | 1.77E-21 |
| TRIM13     | 8.30E-26 | -0.253188636 | 0.082 | 0.069 | 1.77E-21 |
| RBBP5      | 9.76E-26 | -0.349640218 | 0.134 | 0.127 | 2.08E-21 |
| AC009309.1 | 1.31E-25 | 0.494996642  | 0.019 | 0.007 | 2.79E-21 |
| LRIG3      | 1.53E-25 | -1.54947189  | 0.021 | 0.039 | 3.27E-21 |
| ASB1       | 3.49E-25 | -0.357085561 | 0.076 | 0.06  | 7.45E-21 |
| METTL27    | 3.91E-25 | -3.491127678 | 0.002 | 0.013 | 8.36E-21 |
| MAVS       | 4.32E-25 | -0.510517538 | 0.122 | 0.135 | 9.22E-21 |
| MOK        | 4.89E-25 | 0.368361998  | 0.022 | 0.01  | 1.04E-20 |
| PTPRN2     | 1.16E-24 | -2.43381538  | 0.005 | 0.018 | 2.48E-20 |
| AC037459.3 | 1.20E-24 | -0.46875344  | 0.023 | 0.015 | 2.57E-20 |
| ZNF426     | 1.24E-24 | -0.428394238 | 0.073 | 0.066 | 2.65E-20 |
| GLS2       | 1.29E-24 | 0.263975046  | 0.021 | 0.01  | 2.75E-20 |
| CXCR3      | 1.58E-24 | 2.032899187  | 0.011 | 0.002 | 3.37E-20 |
| BLOC1S3    | 2.23E-24 | 0.528663432  | 0.044 | 0.023 | 4.77E-20 |
| HIST1H2BE  | 5.75E-24 | -1.386474239 | 0.022 | 0.037 | 1.23E-19 |
| ZNF672     | 6.86E-24 | -0.663230491 | 0.074 | 0.087 | 1.47E-19 |
| SPHK1      | 7.65E-24 | 0.652747348  | 0.016 | 0.006 | 1.63E-19 |
| TCF7L1     | 8.55E-24 | -1.850428093 | 0.002 | 0.012 | 1.83E-19 |
| PANX1      | 1.03E-23 | 0.5216883    | 0.048 | 0.026 | 2.20E-19 |
| RPH3AL     | 1.39E-23 | 0.90069312   | 0.016 | 0.006 | 2.96E-19 |
| PODXL2     | 1.92E-23 | -1.723160636 | 0.013 | 0.019 | 4.11E-19 |
| LEMD2      | 1.99E-23 | -0.79819488  | 0.062 | 0.081 | 4.26E-19 |
| PPIL4      | 2.19E-23 | -0.296703982 | 0.168 | 0.158 | 4.68E-19 |
| AC008079.1 | 2.29E-23 | 1.159924197  | 0.012 | 0.003 | 4.88E-19 |
| CACNA1A    | 2.34E-23 | -1.383624261 | 0.025 | 0.031 | 4.99E-19 |
| AC010761.1 | 2.60E-23 | 0.990105326  | 0.017 | 0.006 | 5.54E-19 |
| RHOG       | 3.29E-23 | 0.646200003  | 0.177 | 0.135 | 7.03E-19 |
| ZFP14      | 4.13E-23 | -0.940333716 | 0.029 | 0.037 | 8.83E-19 |
| CALD1      | 7.66E-23 | -2.969461724 | 0.004 | 0.015 | 1.64E-18 |
| AC104794.2 | 1.17E-22 | -1.133592535 | 0.005 | 0.017 | 2.51E-18 |
| CEBPB-AS1  | 1.42E-22 | -2.316179001 | 0.003 | 0.015 | 3.03E-18 |
| AL137003.2 | 1.63E-22 | -1.286834851 | 0.028 | 0.036 | 3.48E-18 |
| SLC25A44   | 3.96E-22 | -0.30962257  | 0.069 | 0.058 | 8.46E-18 |
| GDPGP1     | 4.45E-22 | 0.538089426  | 0.045 | 0.026 | 9.49E-18 |

|            |          |              |       |       |          |
|------------|----------|--------------|-------|-------|----------|
| ARSB       | 4.55E-22 | 0.448355119  | 0.079 | 0.053 | 9.71E-18 |
| HIST2H2AC  | 4.78E-22 | -0.387210993 | 0.185 | 0.197 | 1.02E-17 |
| ESAM       | 5.05E-22 | 0.487915129  | 0.022 | 0.011 | 1.08E-17 |
| PCYOX1     | 5.26E-22 | -0.507741017 | 0.159 | 0.167 | 1.12E-17 |
| CEP126     | 6.69E-22 | -1.555110345 | 0.012 | 0.028 | 1.43E-17 |
| SHISAL2A   | 1.27E-21 | -0.549445883 | 0.081 | 0.08  | 2.71E-17 |
| FOXB1      | 1.37E-21 | -2.461336894 | 0.003 | 0.015 | 2.93E-17 |
| AL603756.1 | 1.42E-21 | -2.900123227 | 0.004 | 0.016 | 3.03E-17 |
| NFATC4     | 1.76E-21 | -1.721396051 | 0.008 | 0.02  | 3.77E-17 |
| ZNF134     | 1.93E-21 | 0.402773464  | 0.058 | 0.035 | 4.11E-17 |
| KIF3C      | 2.07E-21 | 0.279181038  | 0.02  | 0.01  | 4.42E-17 |
| AC012645.3 | 2.16E-21 | -0.507123288 | 0.139 | 0.175 | 4.62E-17 |
| SCUBE1     | 2.73E-21 | -3.280175013 | 0.002 | 0.012 | 5.83E-17 |
| TBC1D32    | 2.93E-21 | -1.544213089 | 0.018 | 0.024 | 6.25E-17 |
| ZNF227     | 2.95E-21 | 0.295773451  | 0.068 | 0.045 | 6.30E-17 |
| MID2       | 3.02E-21 | -2.717163737 | 0.002 | 0.012 | 6.45E-17 |
| HIST1H4E   | 3.21E-21 | -0.828063111 | 0.043 | 0.052 | 6.85E-17 |
| EXD3       | 3.55E-21 | -1.259235788 | 0.023 | 0.042 | 7.58E-17 |
| AC068633.1 | 4.38E-21 | -0.618720147 | 0.023 | 0.018 | 9.34E-17 |
| FAM49A     | 5.20E-21 | 0.40386806   | 0.177 | 0.137 | 1.11E-16 |
| ACBD4      | 5.37E-21 | -0.994156234 | 0.049 | 0.071 | 1.15E-16 |
| EPB41L4A   | 7.09E-21 | -0.59099279  | 0.051 | 0.08  | 1.51E-16 |
| TRAF2      | 1.31E-20 | -0.593165036 | 0.054 | 0.054 | 2.80E-16 |
| DYNLT3     | 1.60E-20 | -0.48987141  | 0.125 | 0.152 | 3.41E-16 |
| C5orf30    | 2.49E-20 | -0.353322312 | 0.081 | 0.071 | 5.33E-16 |
| SP4        | 2.79E-20 | -0.466223812 | 0.075 | 0.077 | 5.95E-16 |
| USP20      | 3.01E-20 | -0.43894061  | 0.042 | 0.033 | 6.44E-16 |
| MAN1B1-DT  | 3.13E-20 | -0.551313667 | 0.046 | 0.042 | 6.69E-16 |
| CLMP       | 3.74E-20 | -2.843204815 | 0.004 | 0.014 | 7.99E-16 |
| PTPRJ      | 4.13E-20 | 0.671773686  | 0.008 | 0.017 | 8.83E-16 |
| ATG10      | 7.72E-20 | -0.35551682  | 0.094 | 0.085 | 1.65E-15 |
| VPS8       | 1.18E-19 | -0.473954361 | 0.074 | 0.075 | 2.52E-15 |
| AL390208.1 | 1.71E-19 | -1.637154433 | 0.013 | 0.019 | 3.65E-15 |
| OSGEPL1    | 2.20E-19 | 0.402617489  | 0.052 | 0.034 | 4.70E-15 |
| EFEMP1     | 2.64E-19 | 1.112113586  | 0.012 | 0.003 | 5.64E-15 |
| PLEKHB1    | 3.16E-19 | -0.730260961 | 0.018 | 0.014 | 6.76E-15 |
| MBIP       | 3.51E-19 | -0.67505647  | 0.084 | 0.103 | 7.50E-15 |
| SMN2       | 3.67E-19 | 1.196189544  | 0.023 | 0.01  | 7.83E-15 |
| HCG27      | 4.66E-19 | -1.026069115 | 0.024 | 0.028 | 9.96E-15 |
| MYL9       | 8.03E-19 | 0.396813017  | 0.019 | 0.01  | 1.72E-14 |
| OSBPL6     | 8.37E-19 | -2.26042849  | 0.003 | 0.012 | 1.79E-14 |
| VWA7       | 9.61E-19 | -2.513021251 | 0.005 | 0.015 | 2.05E-14 |
| ICK        | 9.75E-19 | -0.43369418  | 0.094 | 0.094 | 2.08E-14 |
| C15orf53   | 1.12E-18 | -0.690039763 | 0.018 | 0.014 | 2.39E-14 |
| AC093525.6 | 1.13E-18 | -0.347339245 | 0.022 | 0.014 | 2.42E-14 |
| AL606760.3 | 1.50E-18 | -2.838754858 | 0.004 | 0.014 | 3.19E-14 |
| SPA17      | 3.21E-18 | -0.549540178 | 0.028 | 0.023 | 6.86E-14 |
| AL135925.1 | 4.31E-18 | -0.491776799 | 0.054 | 0.047 | 9.20E-14 |
| NECAB1     | 4.56E-18 | 1.369305329  | 0.011 | 0.003 | 9.75E-14 |
| AC005618.1 | 6.10E-18 | -0.380949428 | 0.018 | 0.01  | 1.30E-13 |

|             |          |              |       |       |          |
|-------------|----------|--------------|-------|-------|----------|
| GTPBP2      | 1.42E-17 | -0.621682497 | 0.059 | 0.081 | 3.03E-13 |
| LILRB3      | 1.80E-17 | 2.126609829  | 0.025 | 0.013 | 3.85E-13 |
| AC008083.2  | 2.18E-17 | 0.408973051  | 0.013 | 0.005 | 4.66E-13 |
| ZNF117      | 2.86E-17 | -0.343022158 | 0.071 | 0.067 | 6.10E-13 |
| AC074044.1  | 3.82E-17 | -0.566145786 | 0.023 | 0.018 | 8.16E-13 |
| FAR2        | 4.35E-17 | -0.851595646 | 0.042 | 0.054 | 9.29E-13 |
| JMJD1C-AS1  | 5.21E-17 | 0.797499372  | 0.011 | 0.004 | 1.11E-12 |
| AC105254.1  | 5.97E-17 | -2.689080008 | 0.004 | 0.011 | 1.27E-12 |
| CA5B        | 6.49E-17 | -0.332480872 | 0.074 | 0.065 | 1.39E-12 |
| AC048341.2  | 6.80E-17 | -0.955112078 | 0.026 | 0.031 | 1.45E-12 |
| AC005838.2  | 7.96E-17 | -0.283725663 | 0.111 | 0.101 | 1.70E-12 |
| GIMAP8      | 8.51E-17 | 2.863699212  | 0.015 | 0.006 | 1.82E-12 |
| RASGEF1A    | 8.58E-17 | -1.091532925 | 0.002 | 0.01  | 1.83E-12 |
| GLYCTK      | 8.69E-17 | -0.788475515 | 0.039 | 0.041 | 1.86E-12 |
| AC005480.1  | 1.17E-16 | 0.902187945  | 0.014 | 0.005 | 2.50E-12 |
| ALG1L       | 1.30E-16 | -1.026141539 | 0.017 | 0.019 | 2.78E-12 |
| AC112907.3  | 1.63E-16 | -1.109671288 | 0.019 | 0.023 | 3.49E-12 |
| AC092910.3  | 2.06E-16 | -1.323156095 | 0.015 | 0.021 | 4.41E-12 |
| TRIM58      | 2.62E-16 | -0.74258233  | 0.007 | 0.02  | 5.60E-12 |
| AP003352.1  | 2.85E-16 | 0.293211751  | 0.019 | 0.009 | 6.10E-12 |
| ARRDC4      | 3.06E-16 | 1.504957892  | 0.026 | 0.012 | 6.55E-12 |
| AC011446.2  | 3.15E-16 | -1.312209376 | 0.016 | 0.029 | 6.72E-12 |
| AC010883.1  | 3.66E-16 | 0.433765005  | 0.026 | 0.014 | 7.82E-12 |
| HIST1H2AB   | 4.17E-16 | -1.028073155 | 0.015 | 0.013 | 8.90E-12 |
| GOLPH3L     | 5.46E-16 | -0.523952    | 0.13  | 0.147 | 1.17E-11 |
| GALNT13     | 6.88E-16 | -2.131649457 | 0.006 | 0.015 | 1.47E-11 |
| AC133550.2  | 7.48E-16 | -0.646266129 | 0.019 | 0.017 | 1.60E-11 |
| CHODL       | 9.19E-16 | 0.404838572  | 0.011 | 0.004 | 1.96E-11 |
| STRADB      | 1.50E-15 | -0.509866809 | 0.047 | 0.07  | 3.21E-11 |
| CDC25B      | 2.38E-15 | -0.508830357 | 0.078 | 0.088 | 5.08E-11 |
| SPDYA       | 2.93E-15 | 0.977016772  | 0.016 | 0.007 | 6.27E-11 |
| ITPKB       | 3.30E-15 | -0.275520918 | 0.059 | 0.049 | 7.05E-11 |
| SLC19A2     | 3.45E-15 | -0.781931884 | 0.035 | 0.039 | 7.36E-11 |
| AC092040.1  | 4.06E-15 | -1.060759297 | 0.024 | 0.029 | 8.67E-11 |
| AC009318.3  | 4.11E-15 | -0.49828727  | 0.019 | 0.014 | 8.79E-11 |
| RETREG1     | 8.82E-15 | -1.296738853 | 0.002 | 0.01  | 1.88E-10 |
| AP000542.2  | 1.07E-14 | 0.447085351  | 0.014 | 0.006 | 2.30E-10 |
| NR1H3       | 1.15E-14 | 1.234280607  | 0.021 | 0.009 | 2.45E-10 |
| NPC1        | 1.46E-14 | -0.822126162 | 0.033 | 0.047 | 3.11E-10 |
| COPS4       | 1.53E-14 | -0.250987605 | 0.133 | 0.129 | 3.27E-10 |
| RAD21-AS1   | 3.20E-14 | -2.080608647 | 0.007 | 0.013 | 6.84E-10 |
| MORF4L2-AS1 | 3.24E-14 | -1.293047341 | 0.018 | 0.025 | 6.92E-10 |
| SSTR3       | 4.00E-14 | -2.224211965 | 0.005 | 0.012 | 8.55E-10 |
| FOXO4       | 5.22E-14 | -0.674050126 | 0.022 | 0.023 | 1.11E-09 |
| RNASEL      | 5.67E-14 | -0.593232389 | 0.013 | 0.027 | 1.21E-09 |
| PAG1        | 9.38E-14 | 1.111736401  | 0.027 | 0.023 | 2.00E-09 |
| METTL18     | 9.50E-14 | -0.642456422 | 0.053 | 0.072 | 2.03E-09 |
| AL354920.1  | 1.31E-13 | -1.20157483  | 0.017 | 0.031 | 2.81E-09 |
| KIF1BP      | 2.27E-13 | -0.380310064 | 0.052 | 0.075 | 4.85E-09 |
| BLZF1       | 2.58E-13 | -0.388529314 | 0.114 | 0.135 | 5.52E-09 |



|            |          |              |       |       |          |
|------------|----------|--------------|-------|-------|----------|
| AC009133.3 | 3.87E-13 | -1.589147104 | 0.013 | 0.02  | 8.27E-09 |
| KBTBD8     | 8.79E-13 | -0.711424894 | 0.051 | 0.054 | 1.88E-08 |
| EPSTI1     | 1.01E-12 | 0.994251705  | 0.114 | 0.099 | 2.16E-08 |
| ARNT2      | 1.66E-12 | -1.493535052 | 0.003 | 0.011 | 3.55E-08 |
| ANKDD1B    | 2.84E-12 | 1.234093496  | 0.014 | 0.006 | 6.06E-08 |
| BX284668.6 | 3.45E-12 | -1.038754549 | 0.022 | 0.029 | 7.37E-08 |
| EXO5       | 3.82E-12 | 0.731354046  | 0.017 | 0.008 | 8.15E-08 |
| LRRC7      | 4.19E-12 | -1.177893851 | 0.013 | 0.02  | 8.95E-08 |
| C17orf67   | 4.28E-12 | -0.774069894 | 0.04  | 0.056 | 9.15E-08 |
| AC072061.1 | 4.52E-12 | -1.178069727 | 0.016 | 0.024 | 9.64E-08 |
| AL137077.2 | 5.77E-12 | -1.957932156 | 0.004 | 0.011 | 1.23E-07 |
| AC008378.1 | 5.83E-12 | -1.977782727 | 0.005 | 0.01  | 1.25E-07 |
| ANKRD33B   | 7.47E-12 | -0.642996765 | 0.07  | 0.089 | 1.60E-07 |
| ILDR1      | 8.04E-12 | -1.159275033 | 0.017 | 0.03  | 1.72E-07 |
| AC136475.5 | 9.16E-12 | -0.580665094 | 0.009 | 0.019 | 1.96E-07 |
| CNTN1      | 1.00E-11 | -1.234882488 | 0.007 | 0.015 | 2.14E-07 |
| C2CD5      | 1.04E-11 | -0.309873211 | 0.079 | 0.086 | 2.23E-07 |
| KLRF1      | 1.23E-11 | 0.625650228  | 0.007 | 0.012 | 2.63E-07 |
| AL135905.1 | 1.39E-11 | -0.952075693 | 0.015 | 0.013 | 2.97E-07 |
| MAP2       | 1.61E-11 | 0.259649733  | 0.022 | 0.013 | 3.44E-07 |
| TNFSF9     | 1.95E-11 | -1.192449855 | 0.011 | 0.012 | 4.17E-07 |
| ANKRD20A4  | 2.10E-11 | -1.761380659 | 0.005 | 0.013 | 4.48E-07 |
| GPRASP1    | 2.11E-11 | -1.385440537 | 0.009 | 0.015 | 4.51E-07 |
| AC120193.1 | 2.43E-11 | 0.2542149    | 0.012 | 0.007 | 5.20E-07 |
| BCAS3      | 3.58E-11 | -0.461570523 | 0.053 | 0.053 | 7.64E-07 |
| PKD2L2     | 4.04E-11 | -1.344281004 | 0.011 | 0.014 | 8.62E-07 |
| FCRL1      | 4.33E-11 | -0.908285875 | 0.012 | 0.018 | 9.24E-07 |
| AC009093.2 | 4.52E-11 | -0.895532961 | 0.026 | 0.027 | 9.65E-07 |
| ZC3H12D    | 5.26E-11 | -0.399828711 | 0.01  | 0.006 | 1.12E-06 |
| SYTL3      | 7.35E-11 | -1.308557033 | 0.016 | 0.028 | 1.57E-06 |
| INPP4B     | 8.75E-11 | -1.290338869 | 0.004 | 0.011 | 1.87E-06 |
| WDR11-AS1  | 9.53E-11 | -1.815872512 | 0.004 | 0.011 | 2.04E-06 |
| ZC3H11A    | 1.31E-10 | -0.653306684 | 0.023 | 0.021 | 2.80E-06 |
| ETV3       | 1.50E-10 | -0.305821616 | 0.115 | 0.117 | 3.21E-06 |
| PRICKLE1   | 1.96E-10 | -0.93943407  | 0.011 | 0.021 | 4.19E-06 |
| TCTN2      | 2.10E-10 | -0.452131779 | 0.014 | 0.01  | 4.48E-06 |
| LINC01465  | 3.34E-10 | -0.689464877 | 0.032 | 0.036 | 7.13E-06 |
| PTPRD      | 3.64E-10 | -1.558083902 | 0.007 | 0.015 | 7.77E-06 |
| AC012368.2 | 3.98E-10 | -2.111237619 | 0.004 | 0.01  | 8.49E-06 |
| HIST2H2AB  | 4.59E-10 | -1.478416159 | 0.01  | 0.016 | 9.81E-06 |
| AC079305.1 | 6.24E-10 | -1.096504341 | 0.014 | 0.021 | 1.33E-05 |
| AC108134.2 | 7.14E-10 | -1.877310395 | 0.004 | 0.011 | 1.53E-05 |
| AL021068.1 | 7.17E-10 | -1.480952938 | 0.006 | 0.013 | 1.53E-05 |
| AC073195.1 | 7.63E-10 | -0.450062691 | 0.014 | 0.013 | 1.63E-05 |
| DUSP19     | 8.44E-10 | -0.684265592 | 0.014 | 0.013 | 1.80E-05 |
| HEXA-AS1   | 9.18E-10 | -1.805989725 | 0.007 | 0.012 | 1.96E-05 |
| GAS7       | 2.22E-09 | 1.978198128  | 0.011 | 0.007 | 4.74E-05 |
| TXLNB      | 2.32E-09 | -0.36952895  | 0.025 | 0.023 | 4.94E-05 |
| TTC9       | 2.77E-09 | 0.721645272  | 0.034 | 0.023 | 5.91E-05 |
| ARHGEF3    | 3.07E-09 | -0.336961001 | 0.072 | 0.076 | 6.56E-05 |

|            |          |              |       |       |             |
|------------|----------|--------------|-------|-------|-------------|
| AC092069.1 | 3.23E-09 | -0.331626912 | 0.103 | 0.099 | 6.90E-05    |
| ZFYVE1     | 4.67E-09 | 0.878865557  | 0.03  | 0.019 | 9.98E-05    |
| PLLP       | 5.84E-09 | 0.373837569  | 0.011 | 0.005 | 0.000124643 |
| AC078883.3 | 7.06E-09 | -0.555686825 | 0.05  | 0.056 | 0.000150863 |
| TMEM53     | 7.34E-09 | 0.324398435  | 0.024 | 0.016 | 0.00015678  |
| AHDC1      | 9.29E-09 | -0.344701685 | 0.017 | 0.015 | 0.000198327 |
| TPP1       | 1.24E-08 | 0.29754227   | 0.158 | 0.145 | 0.000263952 |
| ADPRM      | 1.59E-08 | 0.255393364  | 0.032 | 0.023 | 0.000339229 |
| MYOF       | 2.19E-08 | 1.207492075  | 0.009 | 0.01  | 0.000467756 |
| POLD4      | 2.45E-08 | -0.365416206 | 0.071 | 0.072 | 0.000524118 |
| ECHDC3     | 2.98E-08 | 0.592388488  | 0.029 | 0.018 | 0.000635767 |
| TMEM250    | 5.10E-08 | -0.319603117 | 0.071 | 0.08  | 0.001089133 |
| PLPPR2     | 5.77E-08 | 0.826785702  | 0.022 | 0.014 | 0.00123216  |
| RNF43      | 5.80E-08 | -1.848085545 | 0.006 | 0.01  | 0.001238983 |
| STAT4      | 6.76E-08 | -0.463342895 | 0.113 | 0.125 | 0.001443189 |
| LINC01801  | 1.14E-07 | 1.337291083  | 0.014 | 0.007 | 0.002427537 |
| ARHGAP31   | 1.23E-07 | -0.338148638 | 0.035 | 0.044 | 0.00263632  |
| CFH        | 1.35E-07 | -1.628983835 | 0.004 | 0.01  | 0.002884652 |
| SPRY1      | 1.70E-07 | -0.860754433 | 0.024 | 0.031 | 0.00363448  |
| PRCD       | 1.74E-07 | -1.350078161 | 0.005 | 0.011 | 0.003722707 |
| AC016708.1 | 1.94E-07 | 0.292529157  | 0.01  | 0.006 | 0.00413625  |
| VAMP3      | 2.23E-07 | 0.323248493  | 0.155 | 0.135 | 0.004753593 |
| ZNF571     | 2.44E-07 | -0.948475408 | 0.009 | 0.016 | 0.005203746 |
| DDIT4-AS1  | 3.77E-07 | -1.456821792 | 0.007 | 0.013 | 0.008049164 |
| AL590764.1 | 3.97E-07 | 0.263083034  | 0.024 | 0.016 | 0.008475883 |
| LINC00511  | 4.84E-07 | 0.31711566   | 0.01  | 0.006 | 0.01033449  |
| FPGT       | 5.34E-07 | -0.730186648 | 0.015 | 0.021 | 0.011412105 |
| FGF13      | 8.43E-07 | -0.703258677 | 0.015 | 0.022 | 0.017993475 |
| MOSPD2     | 8.57E-07 | 0.282183783  | 0.061 | 0.049 | 0.018300689 |
| NOTCH1     | 9.94E-07 | -0.268401016 | 0.032 | 0.043 | 0.021219851 |
| AL033527.5 | 1.35E-06 | -0.340762743 | 0.039 | 0.037 | 0.028865485 |
| B3GNT5     | 1.36E-06 | 0.976337068  | 0.012 | 0.006 | 0.029010055 |
| TRMT10A    | 1.54E-06 | -0.438978327 | 0.044 | 0.054 | 0.032911923 |
| LINC01358  | 1.95E-06 | -1.012967031 | 0.009 | 0.016 | 0.041619793 |
| AC092718.1 | 2.04E-06 | -1.262300739 | 0.006 | 0.011 | 0.04364017  |
| ADAMTSL4   | 2.18E-06 | 0.654453909  | 0.023 | 0.016 | 0.046526383 |

## Supplementary Table S2

|              | baseMean    | log2FoldChange | lfcSE       | pvalue      | padj        |
|--------------|-------------|----------------|-------------|-------------|-------------|
| SSX2         | 607.6591199 | -13.99023503   | 3.221299021 | 1.25E-26    | 1.16E-24    |
| SSX2B        | 607.5012824 | -13.98608237   | 3.216838876 | 1.26E-26    | 1.16E-24    |
| LOC124900602 | 78.17232375 | -10.65095038   | 2.896069032 | 8.48E-16    | 3.77E-14    |
| MAGEC1       | 72.3464631  | -10.52775074   | 2.890605973 | 1.53E-15    | 6.59E-14    |
| C9orf64      | 50.57205003 | -9.925657648   | 2.832116071 | 7.34E-14    | 2.65E-12    |
| BOK-AS1      | 43.63127328 | -9.674814242   | 2.806864959 | 3.19E-13    | 1.08E-11    |
| ZNF649       | 32.74059288 | -9.179566034   | 2.75988136  | 6.22E-12    | 1.79E-10    |
| NFILZ        | 29.1743931  | 9.168690742    | 2.834312436 | 8.97E-12    | 2.54E-10    |
| MEIOC        | 24.54395457 | -8.682369362   | 2.711551187 | 9.15E-11    | 2.20E-09    |
| GABRA4       | 17.87267797 | 8.300754376    | 2.746517139 | 1.02E-09    | 2.13E-08    |
| SSX7         | 16.85776637 | -8.012102686   | 2.652060924 | 3.03E-09    | 5.91E-08    |
| LOC105373974 | 103.9609559 | -7.986298434   | 0.971724042 | 2.05E-15    | 8.68E-14    |
| LIN28B       | 134.3910221 | -7.836140936   | 0.821069078 | 7.19E-21    | 4.73E-19    |
| ARHGAP25     | 566.1053463 | -7.834781969   | 0.395246504 | 9.17E-87    | 6.35E-84    |
| PYDC2-AS1    | 118.1003418 | -7.658666318   | 0.813029854 | 3.68E-20    | 2.35E-18    |
| LINC01224    | 12.76072694 | -7.488133763   | 2.617147458 | 4.57E-08    | 7.36E-07    |
| KLRK1        | 10.54278571 | 7.295887433    | 2.670110575 | 1.61E-07    | 2.36E-06    |
| ANGPT1       | 60.54952367 | 7.281939681    | 0.991624802 | 8.37E-13    | 2.70E-11    |
| LOC613266    | 33.26022514 | 7.19044007     | 1.306986694 | 5.69E-10    | 1.24E-08    |
| LOC105371197 | 34.41934565 | -7.10736594    | 1.300565902 | 8.35E-10    | 1.77E-08    |
| TRPM6        | 31.72444154 | -6.999708718   | 1.296444211 | 1.43E-09    | 2.94E-08    |
| PARVG        | 9.172881757 | -6.858489051   | 2.575612646 | 6.85E-07    | 8.93E-06    |
| STYK1        | 8.407820331 | 6.854868862    | 2.640966466 | 1.03E-06    | 1.29E-05    |
| TTC22        | 9.149853854 | -6.832877562   | 2.586991861 | 9.58E-07    | 1.21E-05    |
| CTSZ         | 59.86535699 | -6.64505066    | 0.833665227 | 4.76E-15    | 1.95E-13    |
| TIGIT        | 8.08871283  | -6.604009015   | 2.565060398 | 1.95E-06    | 2.30E-05    |
| LOC124905234 | 7.983722107 | -6.582488622   | 2.564010854 | 2.11E-06    | 2.48E-05    |
| SSX4         | 24.34229343 | -6.557724925   | 1.302713369 | 1.31E-08    | 2.28E-07    |
| SSX4B        | 24.34229343 | -6.557724925   | 1.302713369 | 1.31E-08    | 2.28E-07    |
| ZNF577       | 7.114475873 | -6.342888465   | 2.554325167 | 5.09E-06    | 5.48E-05    |
| NUDT13       | 6.434213872 | 6.295449031    | 2.616139774 | 8.13E-06    | 8.36E-05    |
| GBP4         | 270.1721206 | 6.224469149    | 0.335263296 | 5.90E-77    | 3.00E-74    |
| RN7SL128P    | 6.645976486 | 6.194107059    | 2.726696592 | 3.47E-05    | 0.000310725 |
| LOC105376418 | 6.399156423 | -6.102190256   | 2.557410284 | 1.31E-05    | 0.000129485 |
| PTCHD4       | 6.201125813 | -6.041265107   | 2.545269483 | 1.46E-05    | 0.000142586 |
| SOX5         | 71.43361708 | -5.954465024   | 0.617125918 | 4.27E-22    | 3.08E-20    |
| ATP10A       | 13.41926784 | 5.729004419    | 1.343466044 | 8.32E-07    | 1.07E-05    |
| TLR7         | 1163.001096 | -5.677144388   | 0.156903116 | 1.09E-287   | 9.40E-284   |
| GBP2         | 157.3680793 | 5.563622191    | 0.359109345 | 2.09E-54    | 6.34E-52    |
| TMEM144      | 21.70722213 | -5.558768133   | 1.023689182 | 5.01E-08    | 8.01E-07    |
| GBP1         | 139.9652218 | 5.537263811    | 0.379426296 | 1.64E-48    | 4.23E-46    |
| SSX8P        | 4.895625284 | -5.511213196   | 2.554818584 | 7.71E-05    | 0.000632724 |
| SSX6P        | 4.877484123 | -5.505734251   | 2.553774264 | 7.77E-05    | 0.00063635  |
| ATOH8        | 4.649734149 | 5.48511437     | 2.655972575 | 0.000126776 | 0.000978573 |
| LOC105375451 | 4.669079349 | -5.368615222   | 2.583100164 | 0.000132065 | 0.001013725 |
| RGS9         | 78.18348611 | 5.251009442    | 0.464125806 | 5.64E-30    | 6.51E-28    |
| SPOCK2       | 191.3768802 | -5.103777048   | 0.296035159 | 8.70E-67    | 3.68E-64    |
| FCRL4        | 31.79219861 | 5.094621986    | 0.710904755 | 3.52E-13    | 1.18E-11    |
| KLRC4-KLRK1  | 15.02508889 | 5.087950713    | 1.075097004 | 1.12E-06    | 1.39E-05    |

|              |             |              |             |             |             |
|--------------|-------------|--------------|-------------|-------------|-------------|
| LOC105373480 | 4.192959574 | -5.040581759 | 2.641225627 | 0.00034124  | 0.002332904 |
| GNLY         | 70.47253012 | 4.981481296  | 0.462752643 | 1.79E-27    | 1.80E-25    |
| ZNF350       | 14.21579001 | -4.877670478 | 1.062514028 | 2.19E-06    | 2.55E-05    |
| COL22A1      | 17.23030521 | 4.79996079   | 0.910051888 | 4.97E-08    | 7.97E-07    |
| CLIC2        | 223.9301862 | -4.76969591  | 0.266602428 | 1.53E-72    | 7.38E-70    |
| LOC124900856 | 3.621247249 | -4.719451399 | 2.624860294 | 0.0005431   | 0.003498835 |
| NLRP5        | 35.93408695 | -4.691680198 | 0.614838186 | 7.36E-15    | 2.94E-13    |
| BMP7         | 7.471211332 | 4.655784858  | 1.430715346 | 5.85E-05    | 0.000494581 |
| DPEP1        | 3.721078143 | -4.634848446 | 2.728905876 | 0.000825357 | 0.005043301 |
| MIR548XHG    | 3.482854459 | -4.593887565 | 2.648557047 | 0.000703442 | 0.004389733 |
| CRIM1        | 33.08609925 | -4.580509757 | 0.621427003 | 5.91E-14    | 2.17E-12    |
| EPHX2        | 53.86339735 | -4.573539951 | 0.484005282 | 1.34E-21    | 9.40E-20    |
| SMIM3        | 3.550259275 | -4.573083332 | 2.693281339 | 0.000815219 | 0.004993683 |
| LOC105372349 | 36.75532589 | -4.519757687 | 0.618871545 | 5.29E-14    | 1.96E-12    |
| SSX3         | 3.33278392  | -4.453518182 | 2.677144167 | 0.000914537 | 0.005508535 |
| PHLDA3       | 576.280596  | -4.452670047 | 0.171064795 | 1.48E-150   | 2.56E-147   |
| ENPP2        | 45.95731689 | 4.401749381  | 0.516428622 | 2.19E-18    | 1.16E-16    |
| MACROD2      | 62.44963196 | 4.381931044  | 0.443249778 | 7.63E-24    | 6.21E-22    |
| CD3G         | 20.90511018 | -4.292274519 | 0.751132915 | 2.44E-09    | 4.84E-08    |
| LGALS3BP     | 16.0897291  | 4.288764423  | 0.839346148 | 6.54E-08    | 1.02E-06    |
| H2BC14       | 14.12490052 | 4.247511901  | 1.193269524 | 3.19E-05    | 0.000288728 |
| AICDA        | 6.385108971 | -4.203192326 | 1.481688335 | 0.00025743  | 0.001821788 |
| P3H3         | 119.6859233 | -4.16041281  | 0.309399661 | 5.61E-42    | 1.08E-39    |
| SIT1         | 25.45949437 | -4.15789638  | 0.649066259 | 3.40E-11    | 8.76E-10    |
| KRT8         | 380.849156  | -4.148623852 | 0.185450696 | 1.81E-111   | 1.74E-108   |
| GDF15        | 190.2237265 | -4.146386601 | 0.246423902 | 1.78E-64    | 6.99E-62    |
| TNFRSF1A     | 18.95780705 | -4.136798725 | 0.75904995  | 1.04E-08    | 1.86E-07    |
| LRRC43       | 6.235038432 | -4.134984488 | 1.506910796 | 0.000332431 | 0.002281694 |
| H2AC4        | 13.61104812 | 4.128758528  | 1.238666079 | 6.22E-05    | 0.000523061 |
| MIR23AHG     | 21.97938011 | -4.121448079 | 0.700982236 | 8.09E-10    | 1.72E-08    |
| ZNF883       | 12.06292674 | -4.08139674  | 0.965755206 | 5.27E-06    | 5.64E-05    |
| LRRK2        | 8.582551949 | 4.058641468  | 1.172800909 | 9.67E-05    | 0.000772784 |
| CRMP1        | 27.87503874 | 4.042502769  | 0.589839343 | 1.09E-12    | 3.50E-11    |
| FST          | 5.681459867 | 4.039192528  | 1.523991995 | 0.000372644 | 0.002520733 |
| SIGLEC17P    | 5.510550827 | 4.031381526  | 1.516526861 | 0.0003899   | 0.002625153 |
| CD4          | 5970.284299 | -4.031028476 | 0.089575497 | 0           | 0           |
| LMO2         | 5.840280796 | -4.023639706 | 1.503867981 | 0.000412191 | 0.002758083 |
| CCL4L2       | 229.8945406 | -4.010173296 | 0.215994358 | 6.59E-78    | 3.56E-75    |
| MYLK-AS1     | 11.32921682 | -3.942427124 | 1.003607087 | 1.44E-05    | 0.000140994 |
| MAP2         | 13.45375074 | 3.933701071  | 0.894120317 | 1.43E-06    | 1.74E-05    |
| CHI3L2       | 27.74653317 | -3.93288793  | 0.614695231 | 2.76E-11    | 7.20E-10    |
| SCARNA9L     | 9.305884295 | 3.913445799  | 1.477228795 | 0.000587593 | 0.00376029  |
| LOC124903989 | 17.65184257 | 3.886047268  | 0.743521502 | 2.48E-08    | 4.15E-07    |
| SCN3A        | 316.6222878 | 3.864490757  | 0.186972192 | 5.16E-96    | 4.06E-93    |
| TERC         | 8.155136105 | 3.842709422  | 1.294746577 | 0.000329916 | 0.002268024 |
| SPRR1A       | 5.603403455 | -3.835483742 | 1.511530946 | 0.000513901 | 0.003346556 |
| CCL3L3       | 2425.785006 | -3.833737967 | 0.117432352 | 3.09E-234   | 1.07E-230   |
| BABAM2-AS1   | 71.53777806 | -3.818300363 | 0.36469362  | 1.00E-26    | 9.46E-25    |
| MS4A1        | 19.75236089 | 3.814789124  | 0.723900639 | 1.55E-08    | 2.67E-07    |
| COL4A5       | 79.8732555  | -3.765177796 | 0.344201302 | 1.23E-28    | 1.29E-26    |

|              |             |              |             |             |             |
|--------------|-------------|--------------|-------------|-------------|-------------|
| DTX3L        | 125.2926269 | 3.752239384  | 0.277861061 | 1.15E-42    | 2.28E-40    |
| LGALS9       | 38.71071591 | 3.731700094  | 0.477827737 | 7.11E-16    | 3.22E-14    |
| GBP5         | 4.857755924 | 3.726306195  | 1.595871829 | 0.000880804 | 0.005324436 |
| LINC00668    | 4.907815117 | 3.722078818  | 1.593746563 | 0.000837506 | 0.00510313  |
| TNFSF9       | 1991.064812 | -3.712068328 | 0.119712967 | 1.12E-211   | 3.23E-208   |
| EDA2R        | 102.1796753 | -3.711800637 | 0.293482817 | 1.40E-37    | 2.38E-35    |
| LOC124904613 | 7.601851883 | 3.647213949  | 1.366665338 | 0.000657117 | 0.004142447 |
| PARP9        | 91.50215039 | 3.635896044  | 0.299055061 | 6.62E-35    | 9.55E-33    |
| COL6A2       | 15.51761783 | 3.610408687  | 0.802254001 | 6.45E-07    | 8.45E-06    |
| LOC728989    | 15.07504937 | 3.60860605   | 0.745294941 | 1.58E-07    | 2.31E-06    |
| KRT8P3       | 25.60712409 | -3.608328585 | 0.57891755  | 5.34E-11    | 1.32E-09    |
| KCNK1        | 241.5284903 | -3.570696542 | 0.191628355 | 1.86E-78    | 1.07E-75    |
| DMD          | 12.791182   | 3.566770599  | 0.834888128 | 2.18E-06    | 2.55E-05    |
| CDKN1A       | 7930.94239  | -3.563453643 | 0.102330815 | 2.01E-266   | 1.16E-262   |
| ISLR         | 4.493598438 | 3.555558041  | 1.620601087 | 0.001226983 | 0.007059027 |
| PKHD1L1      | 20.1123848  | -3.542911804 | 0.66018529  | 9.42E-09    | 1.69E-07    |
| KLRC4        | 4.497122434 | 3.531460378  | 1.641784016 | 0.001329347 | 0.007555071 |
| CD96         | 759.0548862 | 3.528819831  | 0.126703981 | 6.96E-172   | 1.51E-168   |
| TCEAL9       | 16.0544389  | -3.527944821 | 0.762629516 | 3.67E-07    | 5.05E-06    |
| MIR9898      | 13.32291774 | -3.518656063 | 0.83791721  | 3.18E-06    | 3.57E-05    |
| EPSTI1       | 25.94066101 | 3.510372488  | 0.570481798 | 8.34E-11    | 2.01E-09    |
| LINC01781    | 20.24261091 | 3.502530903  | 0.630085907 | 2.84E-09    | 5.56E-08    |
| TP53         | 902.0498131 | -3.4719142   | 0.113053972 | 3.22E-208   | 7.96E-205   |
| PRKAG3       | 57.68421695 | -3.468386216 | 0.374201097 | 2.95E-21    | 2.00E-19    |
| TLR9         | 70.44119782 | -3.459011458 | 0.332764645 | 3.18E-26    | 2.87E-24    |
| CNGB3        | 4.784396866 | -3.430867681 | 1.600292844 | 0.001275907 | 0.007293012 |
| MB           | 43.02147064 | 3.403973101  | 0.438175675 | 7.25E-16    | 3.27E-14    |
| NPM2         | 12.12691951 | -3.384180503 | 0.832230755 | 5.98E-06    | 6.31E-05    |
| KLHL4        | 11.64081369 | 3.376928318  | 0.868759259 | 9.43E-06    | 9.54E-05    |
| KIF13A       | 18.55257482 | 3.342599294  | 0.649627949 | 2.45E-08    | 4.10E-07    |
| LURAP1L      | 47.11277006 | 3.335838299  | 0.412718056 | 4.87E-17    | 2.35E-15    |
| JUP          | 34.74992117 | -3.287332481 | 0.491702756 | 3.10E-12    | 9.32E-11    |
| LINC01446    | 11.84272569 | -3.26494818  | 0.854276481 | 1.24E-05    | 0.000122861 |
| LOC124906331 | 6.006122794 | -3.240284975 | 1.289893432 | 0.001286714 | 0.007344107 |
| MS4A7        | 5.813954698 | 3.213473807  | 1.325978658 | 0.001318469 | 0.007498173 |
| LOC105373296 | 4.191893455 | -3.189252212 | 1.715929279 | 0.002572525 | 0.013262404 |
| MIR3648-1    | 17.81522304 | 3.145150455  | 0.983199951 | 5.63E-05    | 0.000478677 |
| PLK2         | 14.85921041 | 3.138296566  | 0.697484885 | 5.94E-07    | 7.84E-06    |
| PARP14       | 196.3774676 | 3.134508206  | 0.20321981  | 8.22E-55    | 2.54E-52    |
| LOC105376360 | 5.760132113 | -3.130058003 | 1.329051584 | 0.001744968 | 0.009574656 |
| HBE1         | 228.7909782 | -3.118141866 | 0.185059492 | 1.34E-64    | 5.38E-62    |
| SYT11        | 671.1834726 | -3.069681931 | 0.121465688 | 2.10E-142   | 2.59E-139   |
| OR51B5       | 97.43331453 | -3.069207626 | 0.267056247 | 1.40E-31    | 1.80E-29    |
| ANO4         | 19.08834871 | 3.066783665  | 0.648377247 | 1.64E-07    | 2.39E-06    |
| SVIL         | 8.364838579 | 3.045724689  | 1.002827249 | 0.000177757 | 0.001316603 |
| LINC02709    | 22.89081421 | -3.028262203 | 0.552490927 | 3.85E-09    | 7.38E-08    |
| HAPLN3       | 322.5771833 | 3.027829892  | 0.17523822  | 5.05E-68    | 2.19E-65    |
| TINAGL1      | 14.52302593 | 3.025075864  | 0.760812364 | 4.53E-06    | 4.93E-05    |
| LOC124903859 | 5.708655425 | -3.0073718   | 1.312079651 | 0.001741567 | 0.009562052 |
| LY96         | 117.1518154 | -2.913856489 | 0.266836338 | 7.21E-29    | 7.61E-27    |

|              |             |              |             |             |             |
|--------------|-------------|--------------|-------------|-------------|-------------|
| CCL4         | 466.0539558 | -2.893238627 | 0.151917745 | 6.87E-82    | 4.25E-79    |
| BLK          | 120.1793898 | -2.883380152 | 0.259229417 | 6.31E-30    | 7.23E-28    |
| NR4A3        | 1134.645525 | -2.873566775 | 0.296159184 | 1.60E-23    | 1.27E-21    |
| NTNG1        | 8.265582734 | 2.872139994  | 1.09428483  | 0.000465031 | 0.003067784 |
| CYS1         | 41.62443353 | 2.869944128  | 0.394855023 | 2.96E-14    | 1.12E-12    |
| GABRB3       | 20.67659039 | 2.860217881  | 0.557726914 | 2.24E-08    | 3.78E-07    |
| LOC107985968 | 12.4055384  | -2.856310261 | 0.755343719 | 1.22E-05    | 0.000121095 |
| LTA          | 20.90696771 | -2.837080308 | 0.579039244 | 7.09E-08    | 1.10E-06    |
| AREG         | 12.30180851 | -2.835708899 | 0.810172717 | 3.36E-05    | 0.000301899 |
| SLC27A6      | 5.22498211  | 2.802857274  | 1.509484804 | 0.003387667 | 0.016708697 |
| GRAMD2B      | 13.26655235 | -2.792862028 | 0.735304793 | 1.12E-05    | 0.00011262  |
| LRRC38       | 24.58079843 | 2.772591803  | 0.506413044 | 3.33E-09    | 6.46E-08    |
| SLITRK2      | 8.523851534 | 2.768335987  | 0.938837408 | 0.000213405 | 0.001545604 |
| RTKN2        | 43.91815173 | 2.733675041  | 0.387739128 | 1.22E-13    | 4.34E-12    |
| H4C9         | 16.93522744 | 2.727580781  | 0.951787161 | 0.000160699 | 0.001204161 |
| ELAVL2       | 32.58039223 | 2.714958819  | 0.448987801 | 1.01E-10    | 2.42E-09    |
| RGS2         | 1218.630973 | -2.689502122 | 0.124430322 | 1.00E-104   | 8.69E-102   |
| APOL3        | 375.2064875 | 2.689404919  | 0.138083543 | 1.11E-85    | 7.09E-83    |
| CLEC7A       | 64.28622785 | 2.664280406  | 0.311701138 | 8.52E-19    | 4.69E-17    |
| LINC00665    | 4.95800586  | -2.660045711 | 1.408306137 | 0.003661353 | 0.017764342 |
| EPHA3        | 31.69791287 | -2.643863518 | 0.460786612 | 6.25E-10    | 1.35E-08    |
| MT1G         | 196.8912637 | -2.635623832 | 0.206247972 | 2.20E-38    | 3.85E-36    |
| GPR162       | 9.666850925 | -2.629988053 | 0.884214731 | 0.000202705 | 0.001479242 |
| MBOAT2       | 329.1156999 | 2.622568051  | 0.158974247 | 2.44E-62    | 8.99E-60    |
| A4GALT       | 18.64414587 | 2.618981292  | 0.618336751 | 1.36E-06    | 1.66E-05    |
| KLRF2        | 4.735300747 | 2.618505229  | 1.551755022 | 0.004576444 | 0.021401643 |
| LINC02446    | 17.44660666 | 2.61356587   | 0.63128475  | 2.07E-06    | 2.44E-05    |
| LPCAT2       | 82.78386115 | -2.60764829  | 0.281070625 | 1.35E-21    | 9.40E-20    |
| ESRP1        | 13.73467434 | 2.603325258  | 0.703937917 | 1.35E-05    | 0.000132433 |
| LOC102724340 | 40.55606316 | -2.554208655 | 0.405388564 | 2.02E-11    | 5.40E-10    |
| H2BU1        | 21.08631037 | 2.551508452  | 0.918565096 | 0.000194161 | 0.001422284 |
| APOL4        | 4.506821846 | 2.546459854  | 1.549821994 | 0.004964942 | 0.022939673 |
| NR4A1        | 5775.123951 | -2.546387393 | 0.129822738 | 7.83E-87    | 5.65E-84    |
| LOC105373582 | 6.611797347 | 2.543623146  | 1.070769737 | 0.001004419 | 0.005966905 |
| BCYRN1       | 15.0715307  | -2.540725303 | 0.648811567 | 6.59E-06    | 6.90E-05    |
| EEF1A2       | 6.620267096 | 2.536286174  | 1.106531766 | 0.001206656 | 0.00696784  |
| LOC107985211 | 29.79619695 | -2.498872118 | 0.476428625 | 1.12E-08    | 1.98E-07    |
| TUSC3        | 14.11071627 | 2.495691304  | 0.697651988 | 2.04E-05    | 0.0001931   |
| PLA2G2D      | 38.52629357 | 2.481467488  | 0.427908756 | 3.99E-10    | 8.86E-09    |
| RNF43        | 25.3605665  | -2.476777415 | 0.512135711 | 8.53E-08    | 1.31E-06    |
| NR4A2        | 219.4195219 | -2.456137346 | 0.174743932 | 4.64E-46    | 1.11E-43    |
| CA9          | 102.582592  | 2.456006288  | 0.24432595  | 5.65E-25    | 4.77E-23    |
| CES3         | 110.9387223 | -2.447181219 | 0.241026044 | 2.38E-25    | 2.04E-23    |
| ARHGEF6      | 236.0562548 | -2.446327451 | 0.177432824 | 1.70E-44    | 3.72E-42    |
| PHACTR1      | 66.79356164 | -2.438509553 | 0.30501343  | 1.08E-16    | 5.09E-15    |
| BNC2         | 28.10738223 | -2.433444204 | 0.464279921 | 1.03E-08    | 1.84E-07    |
| SNORD14E     | 17.22867341 | -2.419605966 | 0.633147661 | 7.48E-06    | 7.74E-05    |
| CYP26A1      | 22.33421733 | 2.416928736  | 0.524186848 | 2.64E-07    | 3.73E-06    |
| SMOC1        | 58.41864379 | -2.404939842 | 0.313057469 | 1.20E-15    | 5.25E-14    |
| PLK3         | 264.516415  | -2.39861159  | 0.164643462 | 3.95E-49    | 1.05E-46    |

|              |             |              |             |             |             |
|--------------|-------------|--------------|-------------|-------------|-------------|
| ID2B         | 10.02939062 | 2.393172275  | 0.945220013 | 0.000495024 | 0.003234843 |
| STAT1        | 11326.45231 | 2.388936891  | 0.073002103 | 4.63E-236   | 2.01E-232   |
| ASS1P3       | 5.974964526 | -2.388282822 | 1.423535834 | 0.003855898 | 0.018542791 |
| LOC105377663 | 5.291434213 | 2.386628735  | 1.313458252 | 0.003231764 | 0.016081742 |
| CRYAB        | 8.073983908 | -2.386335078 | 1.126094741 | 0.001577039 | 0.00878065  |
| LOC105376505 | 56.96983694 | -2.381539664 | 0.324810347 | 1.92E-14    | 7.39E-13    |
| ANXA9        | 25.96872745 | -2.371631297 | 0.480459505 | 5.24E-08    | 8.34E-07    |
| ACKR3        | 44.23799267 | 2.370540923  | 0.358617438 | 2.66E-12    | 8.00E-11    |
| ASS1         | 1087.854414 | -2.365162153 | 0.092559081 | 3.02E-145   | 4.36E-142   |
| BASP1        | 441.6574293 | 2.357939904  | 0.131552806 | 4.64E-73    | 2.29E-70    |
| CYSLTR1      | 123.2469847 | -2.339376787 | 0.220946785 | 2.86E-27    | 2.81E-25    |
| TTC39C       | 30.03957644 | 2.335115536  | 0.447196406 | 1.17E-08    | 2.05E-07    |
| BCYRN1P1     | 14.64135267 | -2.333365744 | 0.645610725 | 2.00E-05    | 0.000190141 |
| LINC01053    | 7.598863908 | -2.321754591 | 1.067790094 | 0.001484571 | 0.008325234 |
| CBR3         | 44.93768414 | 2.317641947  | 0.356879283 | 5.65E-12    | 1.64E-10    |
| RAPGEF4      | 20.14428696 | -2.300938091 | 0.556080592 | 2.09E-06    | 2.46E-05    |
| SELENOP      | 9.42760388  | -2.297820402 | 0.85176415  | 0.000403252 | 0.00270349  |
| BCAM         | 9.95804338  | 2.29351186   | 0.816687049 | 0.000260424 | 0.001840719 |
| H2AC16       | 25.23265059 | 2.291303089  | 0.750603591 | 8.78E-05    | 0.000707799 |
| SLC12A7      | 133.1477459 | -2.28169315  | 0.216826067 | 4.35E-27    | 4.26E-25    |
| EVPL         | 8.980472097 | -2.272546053 | 0.952064729 | 0.000769335 | 0.004753171 |
| SNORD14D     | 39.84445708 | -2.236442096 | 0.387468445 | 5.27E-10    | 1.15E-08    |
| COL6A1       | 25.00882029 | 2.236416426  | 0.483149891 | 2.28E-07    | 3.26E-06    |
| ARID5B       | 45.41588402 | 2.235605956  | 0.356248348 | 2.10E-11    | 5.57E-10    |
| KRT8P33      | 14.43656207 | -2.234835283 | 0.66105866  | 4.12E-05    | 0.000361306 |
| AMZ1         | 107.6429486 | 2.233400014  | 0.232414493 | 4.58E-23    | 3.56E-21    |
| SNORD78      | 20.26249648 | -2.230886154 | 0.534604651 | 1.85E-06    | 2.20E-05    |
| DUSP4        | 1690.301843 | -2.227679988 | 0.093484445 | 1.47E-126   | 1.60E-123   |
| LOC124905129 | 51.92114478 | 2.222080934  | 0.324269542 | 4.67E-13    | 1.56E-11    |
| SLC8A1-AS1   | 11.60094057 | -2.221869225 | 0.763331281 | 0.000185041 | 0.001365301 |
| RNF144B      | 11.22799544 | 2.209670383  | 0.756955306 | 0.000189098 | 0.001390492 |
| NALT1        | 4.388857945 | -2.19705561  | 1.832559648 | 0.008402268 | 0.035281782 |
| SNORD79      | 35.96943852 | -2.19428254  | 0.433987526 | 2.17E-08    | 3.67E-07    |
| CLEC9A       | 5.836749353 | 2.186500802  | 1.187937445 | 0.002834491 | 0.014411298 |
| ANKRD20A12P  | 4.493915209 | -2.183632081 | 1.697047686 | 0.00723475  | 0.03133671  |
| ZNF222       | 8.17701125  | -2.173931506 | 0.933030915 | 0.000985157 | 0.005868581 |
| ACTA2        | 31.37384657 | -2.171995152 | 0.443167874 | 6.62E-08    | 1.03E-06    |
| RTP4         | 11.0206025  | 2.15498843   | 0.756445536 | 0.000229424 | 0.001651946 |
| H2BC9        | 66.17928415 | 2.150924859  | 1.053400567 | 0.001049967 | 0.006194985 |
| ASTN1        | 267.0272031 | -2.150250472 | 0.153842033 | 1.81E-45    | 4.12E-43    |
| LOXL4        | 951.2555315 | -2.14750902  | 0.096296599 | 2.85E-111   | 2.60E-108   |
| LOC105370956 | 16.93748166 | -2.138665756 | 0.623391151 | 3.21E-05    | 0.000290012 |
| TNFRSF10B    | 1943.431794 | -2.128675111 | 0.089128569 | 4.12E-127   | 4.75E-124   |
| LAMP5        | 11.53188999 | 2.125255672  | 0.887454264 | 0.000693697 | 0.004339864 |
| H3C1         | 8.797684456 | 2.120757892  | 1.267901457 | 0.002697235 | 0.013814852 |
| NRP2         | 346.0563669 | -2.120629633 | 0.145992601 | 4.73E-49    | 1.24E-46    |
| DHRS2        | 994.4340626 | -2.118141234 | 0.106340986 | 1.38E-89    | 1.04E-86    |
| RFLNB        | 262.2396557 | -2.115324    | 0.150774353 | 8.30E-46    | 1.94E-43    |
| SELL         | 139.3570833 | 2.113276056  | 0.201905263 | 8.73E-27    | 8.32E-25    |
| FOSL2        | 6777.374927 | -2.106877563 | 0.082486719 | 4.67E-145   | 6.23E-142   |

|              |             |              |             |             |             |
|--------------|-------------|--------------|-------------|-------------|-------------|
| LOC124903001 | 38.9976981  | -2.099718707 | 0.375883066 | 1.51E-09    | 3.08E-08    |
| H4C12        | 48.98013219 | 2.08654831   | 1.10952454  | 0.001435549 | 0.00808962  |
| SLFN5        | 122.0880813 | 2.081382574  | 0.25089228  | 6.83E-18    | 3.50E-16    |
| MYO3B        | 4.985763685 | -2.077876717 | 1.436868225 | 0.005912597 | 0.026450126 |
| HOXB6        | 20.59797775 | 2.074034595  | 0.533264226 | 5.83E-06    | 6.19E-05    |
| ATF3         | 2453.113568 | -2.073807503 | 0.0791779   | 2.36E-152   | 4.53E-149   |
| ELAPOR1      | 25.71161842 | 2.071394217  | 0.467865026 | 5.58E-07    | 7.40E-06    |
| H2AC14       | 50.2363233  | 2.057794383  | 1.217826462 | 0.001932328 | 0.01042434  |
| RNA45SN2     | 311131.212  | 2.055034424  | 0.95601145  | 0.000834601 | 0.005089012 |
| CMBL         | 668.0447829 | -2.046072299 | 0.116852811 | 6.18E-70    | 2.74E-67    |
| PELI2        | 50.78690879 | 2.044897085  | 0.367384545 | 1.55E-09    | 3.16E-08    |
| RNA45SN3     | 312291.9349 | 2.043675997  | 0.960959598 | 0.000877109 | 0.005307092 |
| RNA45SN5     | 313407.9539 | 2.040772744  | 0.960430518 | 0.000881341 | 0.005324436 |
| RNA45SN1     | 314658.569  | 2.039653265  | 0.959833523 | 0.000881513 | 0.005324436 |
| LOC105372717 | 120.5361927 | -2.037610287 | 0.270263344 | 3.17E-15    | 1.32E-13    |
| H4C11        | 48.7841051  | 2.028891603  | 1.016300714 | 0.001204304 | 0.006958602 |
| PLEK         | 756.0058823 | 2.027263529  | 0.136673859 | 5.28E-51    | 1.45E-48    |
| LINC02253    | 26.4483915  | 2.022068149  | 0.45816119  | 6.15E-07    | 8.09E-06    |
| APOBEC3H     | 247.2003554 | -2.012971488 | 0.152187854 | 4.00E-41    | 7.53E-39    |
| ZNF165       | 143.2473952 | -2.00702228  | 0.203618783 | 4.40E-24    | 3.61E-22    |
| AOC1         | 113.0989267 | 1.993723798  | 0.225537225 | 6.38E-20    | 3.94E-18    |
| MX1          | 44.00718407 | 1.990815247  | 0.340589678 | 3.32E-10    | 7.42E-09    |
| PMP22        | 30.33235972 | 1.988609448  | 0.47575738  | 1.53E-06    | 1.84E-05    |
| ELF3         | 587.4337175 | -1.9844583   | 0.120659925 | 8.45E-62    | 2.99E-59    |
| RNA45SN4     | 326266.0926 | 1.975293047  | 0.968818712 | 0.001066975 | 0.006284946 |
| SNORD44      | 30.20033283 | -1.974896765 | 0.425376738 | 2.02E-07    | 2.90E-06    |
| RPS27L       | 1821.407173 | -1.974855414 | 0.087873283 | 4.62E-113   | 4.71E-110   |
| H2AC13       | 27.67822344 | 1.971626452  | 0.777785764 | 0.000398004 | 0.002672442 |
| FOXP2        | 49.82385192 | 1.966302276  | 0.344713873 | 7.43E-10    | 1.59E-08    |
| H3C3         | 46.64159012 | 1.963245035  | 1.258447027 | 0.002376262 | 0.012424433 |
| SLC45A3      | 13.98730096 | 1.96130651   | 0.643873001 | 0.000123239 | 0.000954015 |
| EVI2B        | 1685.180504 | 1.96099725   | 0.111269711 | 9.51E-71    | 4.45E-68    |
| GATA3        | 31.71946557 | 1.956167325  | 0.493815511 | 3.82E-06    | 4.21E-05    |
| TNFRSF10D    | 798.6283855 | -1.955629073 | 0.103820662 | 2.91E-80    | 1.74E-77    |
| CKMT1B       | 173.2142723 | -1.953798369 | 0.185715351 | 5.74E-27    | 5.55E-25    |
| WNT11        | 165.5184063 | -1.947694751 | 0.224560227 | 2.87E-19    | 1.66E-17    |
| FLT1         | 8.296836003 | 1.942814033  | 1.038900234 | 0.002179978 | 0.011562697 |
| TMEM132D     | 7.831871127 | 1.938314354  | 0.955731237 | 0.00176199  | 0.009646658 |
| PPIAP14      | 13.94733422 | 1.934147666  | 0.66477602  | 0.000183783 | 0.001357172 |
| CELF6        | 7.10208132  | -1.933808007 | 1.177286554 | 0.003407268 | 0.016786248 |
| HHEX         | 133.6152759 | 1.924948805  | 0.208717682 | 1.84E-21    | 1.27E-19    |
| FAM167A      | 273.0778366 | -1.91931946  | 0.146861669 | 3.94E-40    | 7.25E-38    |
| GPR174       | 11.92111845 | 1.915154516  | 0.816250683 | 0.000802516 | 0.004924581 |
| PTP4A3       | 890.8913282 | -1.913514227 | 0.119908763 | 2.00E-58    | 6.30E-56    |
| TGIF1        | 16.02258781 | 1.907823018  | 0.672438627 | 0.000207062 | 0.001506597 |
| H3P4         | 23.71743578 | 1.907485675  | 0.859012829 | 0.000857043 | 0.005203861 |
| IGHG3        | 27.72021585 | -1.906968442 | 0.452154812 | 1.55E-06    | 1.87E-05    |
| GIMAP7       | 11.53108593 | 1.896912325  | 0.751116464 | 0.000538772 | 0.003477416 |
| IL32         | 62.52712574 | 1.895830277  | 0.291824949 | 5.23E-12    | 1.52E-10    |
| RPL22L1      | 4460.314002 | -1.893926068 | 0.088155613 | 1.39E-103   | 1.15E-100   |



|              |             |              |             |             |             |
|--------------|-------------|--------------|-------------|-------------|-------------|
| ASB2         | 105.0019139 | 1.87723614   | 0.226614195 | 8.35E-18    | 4.26E-16    |
| NFKBID       | 86.43216596 | -1.874423769 | 0.263313237 | 7.65E-14    | 2.74E-12    |
| LOC105371457 | 33.4723402  | 1.874139692  | 0.400991019 | 1.82E-07    | 2.64E-06    |
| FSTL4        | 56.47756737 | -1.871523739 | 0.318291267 | 2.47E-10    | 5.58E-09    |
| MT1E         | 144.316286  | -1.868444879 | 0.203258171 | 2.77E-21    | 1.89E-19    |
| BTBD3        | 99.09552731 | -1.86824223  | 0.244852048 | 1.54E-15    | 6.63E-14    |
| TYRP1        | 6.832309778 | 1.865287615  | 1.066643305 | 0.003030559 | 0.01521165  |
| CKMT1A       | 160.6636241 | -1.860593583 | 0.187477606 | 2.52E-24    | 2.09E-22    |
| MARCHF3      | 106.5597357 | 1.857601546  | 0.223199552 | 5.76E-18    | 2.96E-16    |
| THEMIS2      | 303.2437641 | -1.847184295 | 0.16282913  | 6.11E-31    | 7.51E-29    |
| GCSAM        | 266.4549295 | 1.842079189  | 0.156296205 | 2.95E-33    | 4.09E-31    |
| ST14         | 28.13653835 | 1.841262365  | 0.450800182 | 2.55E-06    | 2.93E-05    |
| PTGER4       | 67.78906492 | 1.836613943  | 0.290569316 | 1.56E-11    | 4.28E-10    |
| RASSF2       | 102.1384833 | 1.833265965  | 0.244367791 | 4.18E-15    | 1.72E-13    |
| BTK          | 968.7968956 | -1.826688858 | 0.098462793 | 4.52E-78    | 2.53E-75    |
| GAS1         | 8.689285099 | 1.820332435  | 1.017295415 | 0.002531232 | 0.01309099  |
| ADORA2A-AS1  | 5.582712182 | -1.814935983 | 1.315761703 | 0.005665287 | 0.025549629 |
| MCAM         | 220.2000879 | -1.803557261 | 0.157869374 | 2.39E-31    | 3.02E-29    |
| LOC124904529 | 118.7467419 | -1.803374859 | 0.233685101 | 6.96E-16    | 3.16E-14    |
| TTC39A       | 22.08661327 | -1.80113274  | 0.517629204 | 2.82E-05    | 0.000258107 |
| LTF          | 455.8884022 | -1.789998159 | 0.116820257 | 3.63E-54    | 1.08E-51    |
| LOC124903462 | 6.519916694 | -1.787318107 | 1.226687971 | 0.004749637 | 0.022121962 |
| SNORD47      | 57.46347329 | -1.784010767 | 0.351787903 | 2.12E-08    | 3.59E-07    |
| LINC00997    | 49.04461707 | -1.781683811 | 0.354515921 | 2.70E-08    | 4.50E-07    |
| TSPAN13      | 652.6864252 | -1.780081556 | 0.163965313 | 1.05E-28    | 1.10E-26    |
| DPYSL4       | 287.6052991 | -1.773190175 | 0.150830163 | 4.89E-33    | 6.66E-31    |
| DOCK2        | 73.05872819 | -1.768576796 | 0.264976138 | 1.70E-12    | 5.28E-11    |
| GRAMD1B      | 8.922156905 | 1.760405572  | 0.910151299 | 0.002045068 | 0.010927011 |
| LOC124905968 | 29.14116432 | -1.755230024 | 0.48727784  | 1.92E-05    | 0.000183401 |
| H2BP1        | 17.09107295 | 1.752319268  | 1.072499021 | 0.002624462 | 0.013470008 |
| CLDN14       | 8.730214677 | -1.749310014 | 1.047001584 | 0.0029622   | 0.014907414 |
| SAMD11       | 20.69726842 | 1.748678095  | 0.55974898  | 9.37E-05    | 0.000751481 |
| MT1X         | 360.2456956 | -1.747159243 | 0.158759036 | 2.66E-29    | 2.89E-27    |
| DUSP26       | 19.24542606 | -1.745926356 | 0.541916725 | 6.98E-05    | 0.000579125 |
| MME          | 188.1859982 | 1.738340413  | 0.168764328 | 4.69E-26    | 4.19E-24    |
| NMI          | 142.0308359 | 1.735399251  | 0.196532183 | 6.88E-20    | 4.22E-18    |
| NLRP11       | 164.3778261 | -1.729260978 | 0.18145238  | 1.05E-22    | 7.94E-21    |
| CXCR1        | 5.217613354 | 1.726267588  | 1.518902292 | 0.006897184 | 0.030104554 |
| TAGAP        | 97.22407738 | 1.721181918  | 0.227834421 | 2.80E-15    | 1.17E-13    |
| PRLR         | 9.242239071 | 1.711067452  | 1.027635631 | 0.003069568 | 0.015380704 |
| ARL11        | 45.01143195 | -1.708126331 | 0.339195418 | 3.17E-08    | 5.23E-07    |
| UBD          | 36.19663993 | 1.701512446  | 0.389071401 | 7.58E-07    | 9.80E-06    |
| IFIT5        | 22.8708764  | 1.700720888  | 0.498121612 | 3.53E-05    | 0.000315778 |
| CMAHP        | 62.37403338 | 1.700171051  | 0.276995321 | 5.55E-11    | 1.37E-09    |
| CRABP2       | 24.38624934 | -1.699377388 | 0.48601722  | 2.79E-05    | 0.000255913 |
| SNORD99      | 5.877681683 | -1.697853909 | 1.488144942 | 0.006475116 | 0.028553497 |
| BCL9L        | 183.0705869 | 1.696883541  | 0.174458883 | 1.54E-23    | 1.23E-21    |
| MDM2         | 14157.60344 | -1.69675931  | 0.106293258 | 1.76E-58    | 5.66E-56    |
| B3GALT4      | 12.10681343 | 1.696662993  | 0.740804625 | 0.000966244 | 0.00577379  |
| IRF1-AS1     | 33.91401702 | 1.693977956  | 0.385261296 | 6.87E-07    | 8.95E-06    |

|              |             |              |             |             |             |
|--------------|-------------|--------------|-------------|-------------|-------------|
| LOC105370449 | 8.098638687 | 1.693714163  | 1.279770606 | 0.004693926 | 0.021903722 |
| AHR          | 30.32659886 | 1.690322582  | 0.415456768 | 2.74E-06    | 3.12E-05    |
| SHTN1        | 56.44007008 | -1.675281691 | 0.301212895 | 1.73E-09    | 3.50E-08    |
| MAGEA9       | 54.27611259 | -1.670746742 | 0.305049317 | 2.94E-09    | 5.75E-08    |
| ID2          | 1078.517629 | 1.669634665  | 0.103920895 | 2.75E-59    | 9.54E-57    |
| NSG2         | 8.440283715 | -1.666906386 | 0.973966036 | 0.003239865 | 0.016108164 |
| MIR34AHG     | 14.75436958 | -1.66360688  | 0.624482635 | 0.000398568 | 0.002675195 |
| IGHG1        | 51.39846722 | -1.660960172 | 0.318644505 | 1.30E-08    | 2.27E-07    |
| CLGN         | 127.7786441 | -1.658373445 | 0.203560762 | 2.66E-17    | 1.32E-15    |
| GADD45A      | 281.744787  | -1.652707224 | 0.142981128 | 4.67E-32    | 6.22E-30    |
| LYPD6B       | 49.09759412 | 1.64394022   | 0.320555309 | 1.87E-08    | 3.19E-07    |
| OGFRL1       | 1651.04419  | 1.643271307  | 0.159710185 | 5.07E-26    | 4.50E-24    |
| MAGEA9B      | 68.28275371 | -1.632405997 | 0.270182397 | 1.05E-10    | 2.48E-09    |
| DTX4         | 201.1945481 | 1.631071677  | 0.166471969 | 8.32E-24    | 6.73E-22    |
| LINC02909    | 278.0738195 | 1.627117859  | 0.144394285 | 1.32E-30    | 1.60E-28    |
| HIVEP1       | 974.2170232 | -1.622841243 | 0.122204752 | 1.90E-41    | 3.62E-39    |
| LMO3         | 112.0142918 | 1.620572779  | 0.247153107 | 3.51E-12    | 1.04E-10    |
| IGHG2        | 716.3910183 | -1.617497016 | 0.107156271 | 1.47E-52    | 4.30E-50    |
| CCDC187      | 95.48742829 | -1.616714123 | 0.255350882 | 1.77E-11    | 4.79E-10    |
| APOBEC3G     | 1390.474284 | 1.6144241    | 0.091740018 | 1.88E-70    | 8.56E-68    |
| CLCF1        | 26.76743524 | -1.613802827 | 0.476768082 | 4.02E-05    | 0.000353152 |
| SPRR2F       | 10.88273138 | -1.607945653 | 0.756738434 | 0.001526816 | 0.008528993 |
| SLC6A5       | 27.11123183 | 1.606968134  | 0.452895624 | 2.23E-05    | 0.000208913 |
| FMNL3        | 284.4817312 | 1.601551352  | 0.139651265 | 1.37E-31    | 1.78E-29    |
| RNASE6       | 7.410390118 | 1.599884625  | 1.198964972 | 0.005077549 | 0.023378866 |
| SLC7A8       | 6.25996869  | -1.598223881 | 1.368154    | 0.006579442 | 0.028939854 |
| MUC3A        | 11.5817597  | 1.598033471  | 0.770369941 | 0.001603768 | 0.008912854 |
| RPS6KA2      | 14.27892953 | 1.589612265  | 0.718062232 | 0.001166503 | 0.006778637 |
| CA2          | 263.6214067 | 1.588240864  | 0.14473558  | 3.72E-29    | 4.00E-27    |
| SYK          | 35.07033498 | 1.586195323  | 0.394025826 | 3.46E-06    | 3.85E-05    |
| CD79A        | 22.10207194 | -1.583473835 | 0.51375648  | 0.000106087 | 0.000838481 |
| WARS1        | 20714.34058 | 1.580150026  | 0.06093493  | 7.76E-150   | 1.22E-146   |
| LOC107985079 | 31.92451882 | 1.579093574  | 0.401650435 | 4.98E-06    | 5.36E-05    |
| TRAV22       | 14.7485584  | 1.570582478  | 0.639163626 | 0.000654539 | 0.004130704 |
| NCALD        | 264.9870797 | 1.56945026   | 0.152072556 | 4.10E-26    | 3.68E-24    |
| SPRY2        | 101.4922937 | -1.55576882  | 0.230346226 | 9.94E-13    | 3.18E-11    |
| SFXN3        | 45.27220805 | 1.555279868  | 0.388358823 | 3.57E-06    | 3.97E-05    |
| SPINK2       | 171.591708  | 1.55229198   | 0.203830998 | 1.88E-15    | 7.99E-14    |
| CCDC122      | 9.985651362 | 1.551182275  | 0.982375025 | 0.003659136 | 0.017759322 |
| ST8SIA4      | 1510.25339  | 1.549179466  | 0.113855816 | 2.48E-43    | 5.17E-41    |
| ZNF829       | 26.71492826 | -1.548971193 | 0.443097555 | 2.75E-05    | 0.000252202 |
| KIAA1522     | 12.43751721 | 1.547856211  | 0.785281809 | 0.001886863 | 0.010236467 |
| GBP3         | 86.28111639 | 1.536069822  | 0.250667429 | 5.99E-11    | 1.47E-09    |
| RSPH1        | 11.36615287 | -1.531125174 | 0.788137136 | 0.002206322 | 0.011676917 |
| IRF7         | 69.91285935 | 1.524053472  | 0.26845499  | 9.56E-10    | 2.01E-08    |
| IGHG4        | 44.12770379 | -1.521471446 | 0.335669587 | 3.83E-07    | 5.23E-06    |
| CAMKV        | 266.153161  | -1.51834464  | 0.144850342 | 7.80E-27    | 7.50E-25    |
| MARCKS       | 2947.925889 | -1.51723896  | 0.117453679 | 2.47E-39    | 4.46E-37    |
| C4orf50      | 18.62752023 | 1.515078617  | 0.557441613 | 0.000336641 | 0.00230602  |
| LBH          | 377.7955767 | 1.512135055  | 0.138018789 | 4.78E-29    | 5.11E-27    |

|              |             |              |             |             |             |
|--------------|-------------|--------------|-------------|-------------|-------------|
| IRF1         | 677.7656015 | 1.510081665  | 0.109272139 | 1.45E-44    | 3.21E-42    |
| IER5         | 872.2276816 | -1.509266925 | 0.12386976  | 3.02E-35    | 4.43E-33    |
| MGC70870     | 25.49281994 | -1.50753626  | 0.464786215 | 6.78E-05    | 0.000564758 |
| DIO2         | 34.26698411 | -1.502508785 | 0.449665642 | 4.83E-05    | 0.000416163 |
| ARHGAP44     | 51.58601946 | 1.501888114  | 0.348846996 | 1.02E-06    | 1.27E-05    |
| PCBP3        | 8.051910892 | 1.499098445  | 0.977824441 | 0.004274707 | 0.020203357 |
| ADPGK-AS1    | 8.893484886 | -1.497044987 | 1.124586601 | 0.004963934 | 0.022939673 |
| CYP19A1      | 25.0482103  | 1.49543897   | 0.468049144 | 7.96E-05    | 0.000650229 |
| BAMBI        | 137.3132889 | 1.492610645  | 0.189976239 | 2.85E-16    | 1.31E-14    |
| F2RL3        | 21.49816547 | 1.483238097  | 0.509391714 | 0.000193684 | 0.001419392 |
| DUSP6        | 679.968549  | 1.47999342   | 0.121303934 | 2.08E-35    | 3.22E-33    |
| FOS          | 668.7186523 | -1.475895341 | 0.121111581 | 2.75E-35    | 4.11E-33    |
| IGHGP        | 49.26109975 | -1.475346136 | 0.325324129 | 3.81E-07    | 5.21E-06    |
| PDGFRB       | 18.87715308 | 1.470564742  | 0.533323326 | 0.000306009 | 0.002122209 |
| RNA28SN2     | 220696.1314 | 1.468945779  | 0.991819202 | 0.003289985 | 0.016301191 |
| NCF1         | 11.54590463 | 1.467028632  | 0.728138614 | 0.001896198 | 0.010264604 |
| RTN4RL1      | 11.83537296 | 1.466411971  | 0.779735848 | 0.002378662 | 0.012429481 |
| TERT         | 824.8776787 | 1.465598786  | 0.138123781 | 1.89E-27    | 1.88E-25    |
| NEAT1        | 447.9517935 | -1.463333893 | 0.192790724 | 2.02E-15    | 8.59E-14    |
| RNA28SN1     | 224842.5779 | 1.463259365  | 0.997429297 | 0.003355659 | 0.01657916  |
| LOC124906134 | 14.42530239 | -1.462089495 | 0.680189719 | 0.001459955 | 0.008208454 |
| RNA28SN5     | 223634.9035 | 1.461423108  | 0.998969147 | 0.003375474 | 0.016653298 |
| HID1         | 327.172936  | -1.460771779 | 0.163248247 | 2.90E-20    | 1.87E-18    |
| SERPINB9     | 146.5965016 | 1.458221366  | 0.204350076 | 6.93E-14    | 2.52E-12    |
| RHOD         | 70.15363657 | -1.457411257 | 0.279023776 | 1.30E-08    | 2.26E-07    |
| RASL11A      | 45.80454524 | -1.456890469 | 0.337702365 | 1.03E-06    | 1.29E-05    |
| PLAC8        | 275.1342475 | -1.456854178 | 0.151359353 | 4.92E-23    | 3.80E-21    |
| SMIM10       | 22.91101503 | 1.456062829  | 0.485386577 | 0.000151087 | 0.001142523 |
| GGT7         | 127.7526452 | 1.456007117  | 0.205132041 | 9.34E-14    | 3.34E-12    |
| NAMPTP1      | 2029.567927 | -1.45569668  | 0.111271711 | 2.93E-40    | 5.45E-38    |
| RNA28SN3     | 221948.604  | 1.453905689  | 1.004843864 | 0.003454299 | 0.016969672 |
| DNAJC12      | 148.5225697 | -1.452410041 | 0.182479974 | 1.31E-16    | 6.15E-15    |
| PLAG1        | 98.46136385 | -1.448795227 | 0.239275885 | 9.28E-11    | 2.23E-09    |
| HPSE         | 48.94096784 | 1.448504677  | 0.34935841  | 2.16E-06    | 2.53E-05    |
| LINC01160    | 8.823995201 | -1.448348551 | 1.003284932 | 0.004876722 | 0.022616547 |
| LOC124905332 | 373262.0111 | 1.445396497  | 1.003597188 | 0.003497656 | 0.017143761 |
| LOC124905315 | 373029.8804 | 1.444755016  | 1.003774599 | 0.00350274  | 0.017160348 |
| KMT2E-AS1    | 40.51392386 | -1.442585046 | 0.354633889 | 3.27E-06    | 3.67E-05    |
| HCN3         | 25.53960022 | -1.441585812 | 0.476643958 | 0.000140151 | 0.001066339 |
| SNORA33      | 17.46160447 | -1.439833726 | 0.634843433 | 0.001076165 | 0.006327994 |
| PDE4DIPP1    | 14.35720492 | 1.438988008  | 0.641954452 | 0.00118516  | 0.006868612 |
| ABCF2P1      | 14.36274879 | -1.438224984 | 0.67182816  | 0.001488879 | 0.008343988 |
| HERPUD1      | 39937.12035 | -1.438102388 | 0.073617189 | 3.46E-86    | 2.30E-83    |
| LOC107985563 | 7.658674627 | 1.43775512   | 1.204081624 | 0.006177682 | 0.02748268  |
| S1PR1        | 779.446799  | 1.437046817  | 0.096027069 | 9.16E-52    | 2.60E-49    |
| COLEC11      | 15.83726398 | -1.434469692 | 0.637313414 | 0.001144159 | 0.006671182 |
| NAMPT        | 6486.546094 | -1.433266152 | 0.11339274  | 9.31E-38    | 1.60E-35    |
| RDH10        | 504.3775721 | -1.431517555 | 0.11741819  | 2.31E-35    | 3.53E-33    |
| RELT         | 409.5621891 | -1.431078977 | 0.141438513 | 3.73E-25    | 3.16E-23    |
| KDM7A-DT     | 99.82768482 | 1.42517014   | 0.228937985 | 3.27E-11    | 8.44E-10    |

|              |             |              |             |             |             |
|--------------|-------------|--------------|-------------|-------------|-------------|
| FLJ32255     | 37.79362274 | 1.424979842  | 0.391855704 | 1.65E-05    | 0.000159889 |
| IL21R        | 707.6112031 | -1.422320277 | 0.11833494  | 2.29E-34    | 3.28E-32    |
| RIPOR2       | 1997.695036 | 1.419801178  | 0.076838332 | 2.32E-77    | 1.22E-74    |
| HOXC10       | 8.077726264 | 1.419057718  | 1.044605452 | 0.005297123 | 0.024201205 |
| DDB2         | 804.417876  | -1.418332875 | 0.105694255 | 4.03E-42    | 7.94E-40    |
| PBX3         | 140.0164727 | 1.417123001  | 0.204758474 | 3.22E-13    | 1.08E-11    |
| DSE          | 213.3682213 | -1.414867434 | 0.154966696 | 5.28E-21    | 3.51E-19    |
| DMC1         | 29.64389334 | -1.410387428 | 0.547047599 | 0.000476856 | 0.003129108 |
| PRRG3        | 6.376352327 | -1.410149461 | 1.649395535 | 0.007881244 | 0.033500123 |
| NEDD9        | 28.13787245 | 1.405600935  | 0.445052946 | 8.90E-05    | 0.000716297 |
| MARCKSP1     | 229.4457327 | -1.405178346 | 0.270290843 | 1.28E-08    | 2.24E-07    |
| LOC400499    | 87.57038461 | -1.403420016 | 0.242093289 | 5.26E-10    | 1.15E-08    |
| ENO3         | 266.3428345 | -1.400243105 | 0.157220418 | 4.58E-20    | 2.88E-18    |
| RNA28SN4     | 235798.2855 | 1.399951423  | 1.025947671 | 0.003929399 | 0.01883296  |
| EPHB2        | 116.9380939 | -1.392890457 | 0.245567967 | 1.11E-09    | 2.31E-08    |
| RASSF6       | 70.03707171 | 1.390994828  | 0.292581021 | 1.36E-07    | 2.03E-06    |
| LOC100420587 | 72.19511979 | 1.387921339  | 0.285371615 | 8.01E-08    | 1.23E-06    |
| INSIG1       | 46831.31311 | -1.387743907 | 0.087686662 | 9.58E-59    | 3.13E-56    |
| GJA3         | 376.7604669 | -1.383472525 | 0.132320809 | 1.13E-26    | 1.06E-24    |
| ACOXL        | 7.719464807 | -1.381027984 | 1.171056    | 0.006832983 | 0.029895594 |
| LINC01511    | 31.85997956 | 1.379641019  | 0.395163919 | 2.98E-05    | 0.00027137  |
| ZBTB46       | 94.14200075 | -1.378061553 | 0.25574726  | 5.55E-09    | 1.03E-07    |
| MIR3667HG    | 53.51833282 | -1.375402761 | 0.317723894 | 1.01E-06    | 1.27E-05    |
| FDXR         | 478.4357801 | -1.3724279   | 0.133424247 | 7.23E-26    | 6.33E-24    |
| LINC00958    | 85.61912093 | -1.370449355 | 0.246030601 | 1.87E-09    | 3.78E-08    |
| PREX1        | 1597.157634 | 1.368758528  | 0.083165736 | 5.09E-62    | 1.84E-59    |
| TMEM45A      | 76.48424419 | -1.367162756 | 0.275234871 | 4.87E-08    | 7.80E-07    |
| CIBAR1       | 39.00428283 | -1.359430233 | 0.418673498 | 7.13E-05    | 0.000590036 |
| ADGRA2       | 99.22336593 | -1.355040601 | 0.265099499 | 2.44E-08    | 4.10E-07    |
| TPPP         | 160.8403164 | -1.352527068 | 0.193618221 | 2.16E-13    | 7.47E-12    |
| LOC105370384 | 206.4814493 | -1.350575368 | 0.171704175 | 2.82E-16    | 1.30E-14    |
| ZNF230       | 27.45755017 | -1.343685157 | 0.445425887 | 0.000151343 | 0.001143831 |
| LIMA1        | 39.33209708 | -1.338721346 | 0.358599474 | 1.31E-05    | 0.000129469 |
| MCF2L        | 128.2241197 | 1.337786304  | 0.196342034 | 7.02E-13    | 2.29E-11    |
| MIR1204      | 16.23666141 | -1.337519262 | 0.622567026 | 0.001541164 | 0.008598047 |
| B3GNT4       | 30.38754103 | -1.336418467 | 0.405085975 | 6.29E-05    | 0.000528942 |
| PER1         | 908.6014911 | -1.335790831 | 0.104994071 | 3.51E-38    | 6.08E-36    |
| CSMD1        | 29.16822752 | -1.332956981 | 0.453255197 | 0.000192598 | 0.001413232 |
| MSX1         | 172.4024787 | -1.331066943 | 0.221100613 | 1.40E-10    | 3.27E-09    |
| PTPRS        | 50.33621243 | 1.328933762  | 0.331982367 | 4.06E-06    | 4.46E-05    |
| SLC4A8       | 164.0024505 | 1.326343614  | 0.172977971 | 1.35E-15    | 5.84E-14    |
| NDRG4        | 126.57861   | -1.325703783 | 0.220699798 | 1.45E-10    | 3.39E-09    |
| BCL11B       | 8.303522078 | 1.322907348  | 1.197877351 | 0.006673895 | 0.029288353 |
| APOL6        | 589.7969667 | 1.322273771  | 0.115661601 | 2.12E-31    | 2.69E-29    |
| FAIM         | 78.17793376 | -1.322006212 | 0.266328787 | 4.85E-08    | 7.79E-07    |
| MYOM2        | 354.9434904 | -1.321263924 | 0.133175162 | 2.58E-24    | 2.13E-22    |
| TMEM52       | 111.5735296 | -1.317255937 | 0.219161124 | 1.50E-10    | 3.49E-09    |
| NMUR1        | 34.20194581 | 1.315947498  | 0.390479946 | 4.80E-05    | 0.000414226 |
| LINC01634    | 12.39517898 | -1.311966515 | 0.796050081 | 0.003993732 | 0.019078472 |
| LOC124904428 | 181.0957608 | -1.311950648 | 0.190872025 | 5.15E-13    | 1.70E-11    |

|              |             |              |             |             |             |
|--------------|-------------|--------------|-------------|-------------|-------------|
| DMRT2        | 16.32067674 | 1.311073     | 0.659665131 | 0.002100315 | 0.011180802 |
| SLC46A3      | 21.53943841 | 1.309824785  | 0.50459008  | 0.000521861 | 0.003387204 |
| C4A          | 120.5247661 | 1.305384327  | 0.210873521 | 4.65E-11    | 1.16E-09    |
| RBM33        | 2227.190221 | -1.303843384 | 0.088337453 | 1.97E-50    | 5.34E-48    |
| RCN3         | 1162.859033 | -1.302263441 | 0.106730444 | 2.70E-35    | 4.06E-33    |
| MXRA7        | 27.10758059 | 1.299630306  | 0.444438066 | 0.000203863 | 0.001485424 |
| LOC105374382 | 133.16      | -1.298948657 | 0.21762833  | 1.88E-10    | 4.31E-09    |
| DUSP9        | 22.53265337 | 1.297028447  | 0.475757006 | 0.000365285 | 0.002476759 |
| OTULINL      | 288.8817302 | 1.296189355  | 0.136371158 | 1.59E-22    | 1.18E-20    |
| UNC13C       | 550.7796173 | 1.294583422  | 0.195031971 | 2.22E-12    | 6.73E-11    |
| ERICH6-AS1   | 37.16794264 | 1.293106923  | 0.365096403 | 2.61E-05    | 0.00024119  |
| APLN         | 63.77144833 | 1.292779165  | 0.289619077 | 5.50E-07    | 7.30E-06    |
| C4B          | 121.5408777 | 1.289470436  | 0.204362136 | 2.20E-11    | 5.82E-10    |
| SNORD80      | 29.00026532 | -1.287098581 | 0.424667862 | 0.000151635 | 0.001144676 |
| PTGS1        | 48.98000554 | 1.28666596   | 0.346047083 | 1.33E-05    | 0.000130668 |
| TAP1         | 7643.945079 | 1.284113853  | 0.090800551 | 3.05E-46    | 7.43E-44    |
| DUSP5        | 18739.78783 | -1.281344761 | 0.0851316   | 2.85E-52    | 8.22E-50    |
| FGR          | 557.937847  | -1.278517533 | 0.121914115 | 8.74E-27    | 8.32E-25    |
| P2RY10       | 1007.452644 | 1.278348828  | 0.112083746 | 3.16E-31    | 3.96E-29    |
| CRIP2        | 47.77148705 | 1.276315325  | 0.324920674 | 5.94E-06    | 6.28E-05    |
| LINC03016    | 7.803664375 | 1.275634949  | 1.147932372 | 0.007181423 | 0.03113688  |
| CFHR1        | 15.27132728 | 1.273142051  | 0.612470907 | 0.001804155 | 0.00983971  |
| ANKRD50      | 151.1945144 | -1.272946305 | 0.201616009 | 2.00E-11    | 5.34E-10    |
| LOC101928156 | 264.0386369 | -1.272270796 | 0.144262131 | 9.63E-20    | 5.83E-18    |
| MAPK15       | 8.888963925 | -1.271765498 | 1.113110864 | 0.007275524 | 0.031458239 |
| MBP          | 522.9199825 | 1.270625102  | 0.114491249 | 9.97E-30    | 1.12E-27    |
| FAM78A       | 420.0590166 | 1.270461502  | 0.127356766 | 1.62E-24    | 1.35E-22    |
| NOVA1-DT     | 21.68463094 | -1.268306764 | 0.51038754  | 0.000728604 | 0.00453694  |
| RGS3         | 121.5744923 | 1.265793261  | 0.204682833 | 4.87E-11    | 1.22E-09    |
| SPAG4        | 422.9891547 | -1.263185451 | 0.129076208 | 1.17E-23    | 9.40E-22    |
| DUSP10       | 68.70117929 | -1.258370488 | 0.28244407  | 5.88E-07    | 7.77E-06    |
| BEST4        | 25.61293592 | -1.257882287 | 0.486359597 | 0.000587501 | 0.00376029  |
| TMEM132D-AS1 | 261.9557469 | 1.257060264  | 0.144406968 | 2.58E-19    | 1.50E-17    |
| TUBB3        | 1216.21307  | -1.245270958 | 0.101679388 | 1.57E-35    | 2.47E-33    |
| FBXO32       | 2030.265841 | -1.24262128  | 0.104621765 | 1.32E-33    | 1.86E-31    |
| KISS1R       | 77.96161019 | -1.241176582 | 0.32324015  | 8.97E-06    | 9.11E-05    |
| LOC100419583 | 578.0968529 | 1.23763078   | 0.104552507 | 2.11E-33    | 2.95E-31    |
| ANKRD37      | 674.4096297 | -1.236945451 | 0.133398706 | 1.65E-21    | 1.14E-19    |
| JUN          | 3289.24555  | -1.235457871 | 0.087080724 | 9.61E-47    | 2.41E-44    |
| FXYP7        | 24.07430871 | 1.23440814   | 0.59750379  | 0.001800946 | 0.009831071 |
| DNAAF1       | 10.92207667 | -1.233494085 | 0.839143481 | 0.005373909 | 0.024489471 |
| FAM114A1     | 45.41520411 | -1.23333135  | 0.339048056 | 2.01E-05    | 0.000190751 |
| NRIP1        | 168.4242054 | 1.232430762  | 0.206765291 | 1.90E-10    | 4.35E-09    |
| LOC107986898 | 42.68109034 | -1.231196397 | 0.358567882 | 3.88E-05    | 0.000342564 |
| IRF9         | 547.8147056 | 1.230247582  | 0.110423968 | 6.83E-30    | 7.79E-28    |
| FCRLA        | 244.7829949 | 1.226456121  | 0.159055305 | 1.04E-15    | 4.56E-14    |
| LOC105372141 | 47.11729514 | 1.221646905  | 0.330874864 | 1.52E-05    | 0.000147907 |
| KANK1        | 1043.910657 | 1.221587465  | 0.097901391 | 8.07E-37    | 1.34E-34    |
| LOC124906307 | 15.80146109 | -1.221019677 | 0.63751328  | 0.002601334 | 0.013375087 |
| MT1F         | 44.61990886 | -1.219806027 | 0.3517883   | 3.78E-05    | 0.000334934 |

|              |             |              |             |             |             |
|--------------|-------------|--------------|-------------|-------------|-------------|
| SNORD14C     | 49.40928429 | -1.218122535 | 0.341671167 | 2.40E-05    | 0.000223389 |
| SLA          | 69.8474631  | 1.215318028  | 0.271196591 | 5.40E-07    | 7.20E-06    |
| DUSP1        | 681.2786487 | -1.213918152 | 0.107435242 | 1.11E-30    | 1.35E-28    |
| FZD8         | 77.48883991 | 1.211358667  | 0.254037594 | 1.44E-07    | 2.13E-06    |
| ABRAXAS1     | 387.8135571 | -1.209432828 | 0.150768927 | 8.73E-17    | 4.16E-15    |
| BAX          | 1680.046368 | -1.20755961  | 0.105853468 | 3.38E-31    | 4.19E-29    |
| PLD4         | 237.5413852 | 1.206176656  | 0.176796952 | 7.50E-13    | 2.43E-11    |
| TRAC         | 125.2889658 | 1.20575858   | 0.22059637  | 3.69E-09    | 7.10E-08    |
| NIBAN2       | 43.56522563 | 1.2049954    | 0.379490401 | 9.98E-05    | 0.000793613 |
| UBXN10       | 70.15242014 | 1.204572137  | 0.274261974 | 8.44E-07    | 1.08E-05    |
| LOC124904791 | 15.17682818 | -1.200469638 | 0.650941717 | 0.003138549 | 0.015680975 |
| CEMIP2       | 227.9138173 | -1.20040838  | 0.178511433 | 1.42E-12    | 4.46E-11    |
| TLR1         | 38.6449516  | 1.200123586  | 0.363883884 | 6.46E-05    | 0.000541027 |
| GPR155       | 586.5595768 | 1.199680608  | 0.108687007 | 2.13E-29    | 2.34E-27    |
| LRIG1        | 1360.541014 | 1.1980347    | 0.086031389 | 3.90E-45    | 8.78E-43    |
| TXNIP        | 30129.1074  | -1.196427569 | 0.070633041 | 2.18E-65    | 8.99E-63    |
| LINC02055    | 109.9543594 | -1.195997165 | 0.21957846  | 4.28E-09    | 8.14E-08    |
| SPIRE2       | 22.89771148 | -1.195418498 | 0.501680046 | 0.000948289 | 0.005682187 |
| VAV3         | 154.9416577 | 1.192797007  | 0.185550082 | 1.08E-11    | 3.02E-10    |
| TASL         | 428.3227605 | 1.192405066  | 0.125991087 | 2.56E-22    | 1.88E-20    |
| LYSMD2       | 72.61013544 | 1.191924359  | 0.253300509 | 1.95E-07    | 2.81E-06    |
| SOAT2        | 16.51089422 | -1.187183833 | 0.645884106 | 0.003010166 | 0.015118053 |
| ATL1         | 28.68761097 | -1.184908397 | 0.447909224 | 0.000481407 | 0.003152999 |
| KLHL3        | 90.4570701  | -1.184045199 | 0.250195563 | 1.64E-07    | 2.40E-06    |
| SNORA63B     | 13.72480219 | -1.183987322 | 0.725434128 | 0.004380627 | 0.020619547 |
| LOC124904704 | 11.67116956 | 1.182711281  | 1.22861239  | 0.00746845  | 0.032123981 |
| AEN          | 2518.837195 | -1.181390923 | 0.086013668 | 5.84E-44    | 1.25E-41    |
| SYNGR1       | 153.456763  | -1.177224654 | 0.2163625   | 4.67E-09    | 8.86E-08    |
| HVCN1        | 2554.481817 | -1.175995122 | 0.091714697 | 1.18E-38    | 2.10E-36    |
| LOC105374933 | 32.50078852 | -1.173322694 | 0.406064125 | 0.000256938 | 0.001819792 |
| CCDC65       | 39.32236366 | 1.172317814  | 0.36319634  | 8.43E-05    | 0.000682821 |
| ZNF225       | 56.4209952  | 1.171225485  | 0.327735264 | 2.41E-05    | 0.000224537 |
| TLE1         | 527.9842599 | 1.169612413  | 0.132675431 | 1.00E-19    | 6.05E-18    |
| RASA4B       | 203.919905  | -1.169363887 | 0.158010772 | 1.19E-14    | 4.68E-13    |
| MOB3B        | 7.065698503 | 1.167674385  | 1.379428826 | 0.008979153 | 0.037252513 |
| TSPAN6       | 32.40323192 | 1.167381927  | 0.403481003 | 0.000244556 | 0.001747106 |
| TUSC1        | 37.53320846 | 1.165865766  | 0.366741013 | 9.95E-05    | 0.000791915 |
| PLAAT4       | 1535.771629 | 1.165443624  | 0.082843686 | 5.54E-46    | 1.31E-43    |
| LRRC2        | 27.8227498  | -1.164439167 | 0.471420459 | 0.000788322 | 0.004854686 |
| KCNS3        | 2619.501857 | -1.164269101 | 0.077698734 | 9.41E-52    | 2.63E-49    |
| KDM7A        | 644.8251159 | 1.163410064  | 0.13121887  | 6.45E-20    | 3.97E-18    |
| TSC22D1      | 1911.391291 | -1.163130511 | 0.10393255  | 4.09E-30    | 4.82E-28    |
| ITGA6        | 1941.823734 | -1.163112542 | 0.089319058 | 7.51E-40    | 1.37E-37    |
| YWHAEP7      | 52.54108477 | 1.162872816  | 0.300762305 | 8.27E-06    | 8.49E-05    |
| BCL11A       | 25.6289495  | 1.160204325  | 0.472023389 | 0.000820196 | 0.005020621 |
| JOSD1        | 4050.025325 | -1.156247233 | 0.099285536 | 2.21E-32    | 2.97E-30    |
| NR3C2        | 21.87129484 | 1.156180404  | 0.55086768  | 0.00184786  | 0.01004375  |
| TM7SF3       | 6551.078733 | -1.154989617 | 0.071841702 | 3.58E-59    | 1.22E-56    |
| GAS2L1       | 49.49587517 | 1.152731742  | 0.326415679 | 3.00E-05    | 0.000273245 |
| LINC01480    | 1404.191455 | -1.152694344 | 0.085963118 | 4.86E-42    | 9.46E-40    |

|              |             |              |             |             |             |
|--------------|-------------|--------------|-------------|-------------|-------------|
| LY6G5C       | 11.66097312 | -1.152074204 | 0.830029455 | 0.006030817 | 0.026930288 |
| CXCR3        | 133.6168394 | 1.150463326  | 0.239009126 | 1.16E-07    | 1.76E-06    |
| DYRK2        | 631.1078366 | 1.150159965  | 0.127943577 | 2.10E-20    | 1.36E-18    |
| RNVU1-15     | 13.87683522 | 1.14993668   | 0.789699336 | 0.005277824 | 0.024128201 |
| LOC124901002 | 100.4769694 | -1.146785205 | 0.230710283 | 5.31E-08    | 8.45E-07    |
| CRYBG3       | 656.84303   | 1.145283921  | 0.124913875 | 3.90E-21    | 2.61E-19    |
| LOC390876    | 9.5004034   | 1.139729851  | 0.927217989 | 0.00723834  | 0.031344422 |
| BOLA3-DT     | 48.61154743 | -1.137450067 | 0.333591781 | 4.74E-05    | 0.00040954  |
| MT2A         | 309.217417  | -1.13627451  | 0.21081949  | 6.07E-09    | 1.12E-07    |
| CCL3         | 15273.16124 | -1.136092137 | 0.101024988 | 1.88E-30    | 2.25E-28    |
| SLC9A3R2     | 296.3425791 | -1.135752756 | 0.160694381 | 1.49E-13    | 5.22E-12    |
| S1PR1-DT     | 18.1754605  | 1.134058013  | 0.637966989 | 0.003470114 | 0.017032872 |
| OAS2         | 866.1161874 | 1.133356404  | 0.107016132 | 2.84E-27    | 2.81E-25    |
| ZNF224       | 106.9877674 | 1.132098021  | 0.214364355 | 1.05E-08    | 1.87E-07    |
| EFR3B        | 310.9775328 | -1.130135126 | 0.13169004  | 8.47E-19    | 4.67E-17    |
| TLN2         | 41.14798874 | -1.12865392  | 0.371789475 | 0.000174771 | 0.001297814 |
| FAM234B      | 209.2711702 | -1.125991364 | 0.15602744  | 4.88E-14    | 1.82E-12    |
| PDZK1        | 15.56755761 | 1.125229328  | 0.621526813 | 0.003369146 | 0.016626815 |
| LOC105377743 | 15.500789   | 1.124522196  | 0.618502311 | 0.003343197 | 0.016527016 |
| KLF2         | 2683.637342 | 1.124409044  | 0.141438333 | 1.66E-16    | 7.79E-15    |
| INKA2        | 171.3506154 | -1.124324315 | 0.170069454 | 3.48E-12    | 1.04E-10    |
| SULF1        | 64.12174169 | -1.122658746 | 0.279211976 | 4.74E-06    | 5.13E-05    |
| GSTO2        | 220.8489974 | -1.122186833 | 0.158898568 | 1.46E-13    | 5.14E-12    |
| FHL2         | 19.08778725 | 1.121330116  | 0.569006271 | 0.002536804 | 0.013105559 |
| SLC2A3       | 1534.42191  | -1.121291316 | 0.087456462 | 1.22E-38    | 2.16E-36    |
| LUCAT1       | 18.23497503 | 1.120805368  | 0.591064548 | 0.002881035 | 0.014592243 |
| GALR2        | 19.93638627 | -1.119859746 | 0.552853353 | 0.00225642  | 0.011898423 |
| LACC1        | 37.84067975 | 1.119707258  | 0.386216416 | 0.000245647 | 0.001753451 |
| PORCN-DT     | 6.454392555 | -1.119648374 | 1.814354709 | 0.009877375 | 0.040398324 |
| F8           | 68.98796428 | -1.117978269 | 0.289489417 | 8.56E-06    | 8.76E-05    |
| CYB561       | 328.9821575 | -1.117569611 | 0.144003992 | 8.04E-16    | 3.61E-14    |
| ITGB4        | 16.54158104 | 1.117352286  | 0.600766808 | 0.003121446 | 0.015604527 |
| PRICKLE1     | 107.3080591 | 1.116960245  | 0.211810386 | 1.11E-08    | 1.96E-07    |
| TNFRSF19     | 115.0548781 | -1.115382141 | 0.205252858 | 4.75E-09    | 8.97E-08    |
| NIPAL2       | 170.0231577 | -1.115280655 | 0.188340937 | 2.71E-10    | 6.10E-09    |
| SOWAHD       | 51.33443534 | 1.114407357  | 0.34507896  | 8.80E-05    | 0.000709374 |
| LOC105375740 | 10.59069669 | -1.11337664  | 0.998744491 | 0.008015633 | 0.033962982 |
| TUBBP5       | 284.5332944 | 1.112988981  | 0.144596875 | 1.21E-15    | 5.28E-14    |
| NAP1L3       | 31.06877968 | 1.111465793  | 0.413616077 | 0.00047098  | 0.003096413 |
| BCAS1        | 8.941556915 | -1.110927745 | 1.151998618 | 0.008684851 | 0.036222438 |
| DRAM1        | 129.0269701 | -1.10982112  | 0.199356616 | 2.33E-09    | 4.65E-08    |
| AVPI1        | 215.2916685 | -1.109397842 | 0.163650165 | 1.17E-12    | 3.72E-11    |
| CD70         | 4234.569536 | -1.107954135 | 0.106768905 | 3.00E-26    | 2.72E-24    |
| TLR4         | 61.97552922 | 1.106157795  | 0.297797631 | 1.51E-05    | 0.0001477   |
| ZBTB7C       | 111.3407431 | 1.105732818  | 0.227388834 | 9.60E-08    | 1.46E-06    |
| ALDH2        | 29.77964658 | 1.105590513  | 0.419731784 | 0.000539388 | 0.003479311 |
| AKAP5        | 20.55124931 | 1.105393391  | 0.556030978 | 0.002400133 | 0.012526554 |
| PCDH18       | 11.57378378 | -1.104742937 | 0.881979759 | 0.007229781 | 0.03132302  |
| BMF          | 452.5649303 | 1.104254262  | 0.124618048 | 7.29E-20    | 4.46E-18    |
| MIR22HG      | 204.3075569 | -1.104107024 | 0.161551053 | 7.47E-13    | 2.43E-11    |

|              |             |              |             |             |             |
|--------------|-------------|--------------|-------------|-------------|-------------|
| PLXND1       | 119.7808077 | 1.103484708  | 0.210840914 | 1.45E-08    | 2.50E-07    |
| RAB31        | 1047.259457 | 1.102937005  | 0.08982544  | 1.09E-35    | 1.75E-33    |
| SNORD81      | 68.98222011 | -1.101102794 | 0.265454768 | 2.83E-06    | 3.21E-05    |
| LOC124904652 | 26.38475018 | -1.098239354 | 0.466382375 | 0.001121017 | 0.006560545 |
| RXRA         | 520.0272881 | 1.09535295   | 0.127092217 | 6.45E-19    | 3.59E-17    |
| CD48         | 10317.80525 | -1.094527021 | 0.066070948 | 1.21E-62    | 4.55E-60    |
| PRSS2        | 39.24838674 | 1.094148569  | 0.360110801 | 0.000169434 | 0.001263604 |
| CSRNP1       | 545.3315559 | -1.08891516  | 0.121719085 | 3.78E-20    | 2.41E-18    |
| HOPX         | 46.84611082 | 1.088146018  | 0.361065279 | 0.000183359 | 0.001354616 |
| GLA          | 2467.194894 | -1.087780948 | 0.078706782 | 2.08E-44    | 4.49E-42    |
| ASRGL1       | 203.8155128 | 1.085936071  | 0.163894856 | 3.14E-12    | 9.41E-11    |
| OAS1         | 324.6556779 | 1.085759323  | 0.12802836  | 2.10E-18    | 1.12E-16    |
| FBXL22       | 6.6808172   | -1.085157319 | 1.635925803 | 0.010583422 | 0.042691151 |
| KREMEN2      | 76.8630154  | -1.082939844 | 0.304226993 | 2.89E-05    | 0.000263966 |
| TEX19        | 389.6293315 | -1.081130921 | 0.129892017 | 8.62E-18    | 4.39E-16    |
| TP63         | 2107.9023   | 1.080350764  | 0.103877728 | 2.27E-26    | 2.07E-24    |
| CD38         | 2550.970649 | 1.079664297  | 0.076149017 | 1.19E-46    | 2.95E-44    |
| IL15RA       | 155.814533  | 1.078521217  | 0.18856486  | 9.45E-10    | 1.99E-08    |
| CCDC141      | 330.6758326 | 1.077406261  | 0.132218629 | 3.50E-17    | 1.70E-15    |
| SPEG         | 10.83893143 | 1.076001825  | 0.840986147 | 0.007347798 | 0.031683719 |
| CCL5         | 3132.539705 | -1.075531986 | 0.092937905 | 5.67E-32    | 7.43E-30    |
| EVPLL        | 8.37756145  | -1.073973466 | 1.175009239 | 0.009780719 | 0.040088217 |
| CLCN2        | 112.6720126 | -1.073278759 | 0.251754405 | 1.76E-06    | 2.11E-05    |
| LAMP3        | 150.8264532 | 1.072228361  | 0.187853547 | 9.94E-10    | 2.08E-08    |
| SEC31A       | 4574.093427 | -1.072066308 | 0.066907879 | 8.65E-59    | 2.88E-56    |
| LOC124904057 | 16.7078952  | 1.071936124  | 0.605691917 | 0.003860497 | 0.018559751 |
| ZMAT3        | 876.3145282 | -1.070105449 | 0.155384828 | 5.13E-13    | 1.70E-11    |
| RASA4        | 218.1046747 | -1.070049211 | 0.154353939 | 3.98E-13    | 1.33E-11    |
| ST3GAL1      | 1313.714289 | 1.070034129  | 0.087695854 | 2.90E-35    | 4.30E-33    |
| JCHAIN       | 190423.9986 | -1.069981314 | 0.101909139 | 5.63E-27    | 5.47E-25    |
| PSMB9        | 2016.745803 | 1.069836388  | 0.096664221 | 1.73E-29    | 1.91E-27    |
| PDE4B        | 1334.291498 | -1.068513247 | 0.104447525 | 1.40E-25    | 1.21E-23    |
| CD109        | 28.54960763 | -1.066893904 | 0.429053185 | 0.000844395 | 0.005136072 |
| USP36        | 2119.945159 | -1.065392285 | 0.095217246 | 4.60E-30    | 5.38E-28    |
| TFAP2A-AS1   | 28.91702464 | 1.062982229  | 0.4229021   | 0.000795645 | 0.004888372 |
| JAKMIP1      | 222.4537433 | 1.062547574  | 0.166632882 | 1.64E-11    | 4.47E-10    |
| PRSS21       | 809.6975594 | -1.062190235 | 0.113449181 | 8.07E-22    | 5.75E-20    |
| TMEM63C      | 174.0026333 | -1.062025141 | 0.183198271 | 6.14E-10    | 1.33E-08    |
| TG           | 21.2366276  | -1.061226382 | 0.566951328 | 0.003215566 | 0.016014944 |
| PFN2         | 153.2152551 | -1.058772684 | 0.191435942 | 2.82E-09    | 5.53E-08    |
| WWC3         | 1340.988874 | 1.057566785  | 0.087024895 | 5.33E-35    | 7.76E-33    |
| ELMOD1       | 18.16893881 | -1.055956885 | 0.590434145 | 0.003939142 | 0.01885931  |
| HES7         | 24.15394579 | -1.055696147 | 0.477404069 | 0.001693605 | 0.009334231 |
| SAT1         | 491.16239   | -1.054936106 | 0.118328076 | 4.97E-20    | 3.10E-18    |
| TRBJ2-1      | 15.58842672 | 1.052923127  | 0.622039933 | 0.004461004 | 0.02094096  |
| HSPA4L       | 291.3060768 | -1.052481112 | 0.158239691 | 2.56E-12    | 7.75E-11    |
| IFNG         | 37.50008019 | 1.052475747  | 0.367776723 | 0.00029746  | 0.002069555 |
| LAT2         | 877.2059991 | 1.052305689  | 0.098013344 | 6.61E-28    | 6.74E-26    |
| HSP90B1      | 79606.19969 | -1.052183302 | 0.063129545 | 3.12E-63    | 1.20E-60    |
| LAPTM5       | 3248.12911  | -1.052051325 | 0.07331199  | 1.06E-47    | 2.70E-45    |



|              |             |              |             |             |             |
|--------------|-------------|--------------|-------------|-------------|-------------|
| SMAD3        | 432.6662137 | 1.050659373  | 0.117851572 | 4.79E-20    | 2.99E-18    |
| LINC01934    | 16.92686248 | 1.050139453  | 0.61244397  | 0.004199879 | 0.019936761 |
| PDE4D        | 291.0178439 | -1.049666198 | 0.160337986 | 5.39E-12    | 1.57E-10    |
| ABCB1        | 352.1159988 | 1.049309265  | 0.141473034 | 1.13E-14    | 4.45E-13    |
| LOC124901018 | 67.15720633 | -1.048831892 | 0.266498149 | 7.04E-06    | 7.32E-05    |
| SERINC5      | 221.6268388 | -1.048562532 | 0.154646643 | 1.14E-12    | 3.63E-11    |
| FOSB         | 338.720203  | -1.047928741 | 0.154404779 | 1.13E-12    | 3.60E-11    |
| RIMS3        | 472.4965475 | 1.047691037  | 0.121550916 | 6.44E-19    | 3.59E-17    |
| APOBEC3F     | 485.9612529 | 1.046862372  | 0.11338191  | 2.63E-21    | 1.80E-19    |
| TMEM229B     | 16.61929302 | 1.04604965   | 0.689858957 | 0.005674099 | 0.025581456 |
| AVIL         | 52.81280486 | 1.045305893  | 0.321229652 | 8.59E-05    | 0.000694398 |
| MPPED2       | 110.0728042 | 1.043666157  | 0.24023511  | 1.17E-06    | 1.44E-05    |
| LRRC8A       | 3451.069071 | 1.043042209  | 0.089265485 | 1.49E-32    | 2.01E-30    |
| SH2D2A       | 371.1390761 | -1.040811711 | 0.136947589 | 2.90E-15    | 1.21E-13    |
| MKNK2        | 2425.251899 | -1.039053935 | 0.106299267 | 1.39E-23    | 1.12E-21    |
| NREP         | 240.1613392 | 1.038537148  | 0.144820463 | 7.07E-14    | 2.56E-12    |
| XPC          | 660.2690065 | -1.036226137 | 0.104769178 | 4.78E-24    | 3.90E-22    |
| ZMYM1        | 25.35549844 | 1.03572584   | 0.460039623 | 0.001524495 | 0.008521521 |
| USP2         | 219.236297  | -1.035381696 | 0.156950097 | 4.22E-12    | 1.24E-10    |
| LDHD         | 36.18443124 | -1.034158339 | 0.39250311  | 0.000616917 | 0.003926185 |
| ASIC1        | 201.160905  | -1.033589179 | 0.188028352 | 3.57E-09    | 6.88E-08    |
| PGM5         | 6.246866068 | -1.033471795 | 3.545691624 | 0.01078157  | 0.043288767 |
| LOC105379364 | 40.83256644 | -1.031096042 | 0.357535966 | 0.000291496 | 0.002032137 |
| PLCXD3       | 14.6970384  | 1.029859167  | 0.769204812 | 0.006983897 | 0.030402418 |
| TRIB1        | 3880.8978   | -1.025678759 | 0.075284058 | 2.83E-43    | 5.84E-41    |
| ZNF568       | 18.98931829 | -1.025652568 | 0.555752519 | 0.003576015 | 0.017453734 |
| LAIR1        | 998.9508972 | 1.023502171  | 0.106465783 | 6.81E-23    | 5.22E-21    |
| ITPRIPL2     | 61.09270263 | -1.022588314 | 0.294263915 | 4.41E-05    | 0.000384198 |
| CD3E         | 220.1119091 | -1.022257108 | 0.156959713 | 7.40E-12    | 2.11E-10    |
| MVB12B       | 117.0116653 | 1.02217504   | 0.215739592 | 1.93E-07    | 2.78E-06    |
| SOCS1        | 22.89942209 | 1.018382668  | 0.541872332 | 0.00331441  | 0.016399721 |
| EGR2         | 86.0679266  | -1.014538483 | 0.239628386 | 2.07E-06    | 2.44E-05    |
| PRDM13       | 39.68825153 | 1.013299744  | 0.363111222 | 0.00039086  | 0.002629573 |
| OGFRP1       | 16.52958679 | 1.013012688  | 0.639581544 | 0.005493526 | 0.024916551 |
| HIC1         | 133.3515382 | 1.012352601  | 0.279292497 | 2.36E-05    | 0.000220618 |
| FBXL7        | 482.8349682 | 1.010422073  | 0.116270549 | 3.60E-19    | 2.05E-17    |
| FAM229B      | 51.92612418 | -1.008963561 | 0.327762706 | 0.000172931 | 0.001286361 |
| PURPL        | 201.9413791 | -1.008076188 | 0.161541561 | 4.27E-11    | 1.08E-09    |
| DERL3        | 3053.583848 | -1.007615307 | 0.116549517 | 5.58E-19    | 3.13E-17    |
| DGKG         | 72.5371525  | -1.006828835 | 0.281940196 | 3.11E-05    | 0.000281999 |
| TBC1D8       | 49.04036894 | 1.00630364   | 0.326385444 | 0.000158077 | 0.001187126 |
| SAMD3        | 18.90107875 | 1.005850864  | 0.650001312 | 0.005685813 | 0.0256076   |
| FAS          | 688.5581706 | -1.004935281 | 0.120086915 | 5.70E-18    | 2.94E-16    |
| HOXB4        | 184.4314335 | 1.004690732  | 0.165518857 | 1.26E-10    | 2.96E-09    |
| IKZF1        | 1501.076758 | 1.003863706  | 0.083888109 | 5.20E-34    | 7.38E-32    |
| LCP2         | 300.6267366 | 1.00190862   | 0.150380256 | 2.59E-12    | 7.82E-11    |
| FCMR         | 553.8250973 | 1.001735236  | 0.113907834 | 1.43E-19    | 8.49E-18    |
| NQO2         | 131.8053256 | 1.001034795  | 0.20015058  | 5.47E-08    | 8.67E-07    |
| BTN3A2       | 2493.606016 | 0.998985147  | 0.073607031 | 5.79E-43    | 1.18E-40    |
| FEZ1         | 109.4666467 | 0.99727658   | 0.214099029 | 2.90E-07    | 4.08E-06    |

|              |             |              |             |             |             |
|--------------|-------------|--------------|-------------|-------------|-------------|
| MXD1         | 1467.018644 | -0.996807411 | 0.097875028 | 2.38E-25    | 2.04E-23    |
| ZNF432       | 50.11509425 | -0.995291315 | 0.322728098 | 0.000161648 | 0.001210751 |
| HSP90B3P     | 247.3794989 | -0.995136938 | 0.150582425 | 3.73E-12    | 1.10E-10    |
| ABTB1        | 235.1594426 | 0.995087109  | 0.152000271 | 5.84E-12    | 1.69E-10    |
| FLT3         | 34.2401546  | 0.994771468  | 0.434364964 | 0.001450642 | 0.008161394 |
| SEPTIN3      | 520.2027013 | -0.994711658 | 0.113765898 | 2.35E-19    | 1.37E-17    |
| BCAT1        | 1689.434002 | 0.994621696  | 0.304247737 | 8.40E-05    | 0.000681089 |
| KIAA0040     | 831.9772117 | 0.992156733  | 0.094687425 | 1.13E-26    | 1.06E-24    |
| KDM6B        | 252.7760681 | -0.992005679 | 0.14792796  | 2.14E-12    | 6.52E-11    |
| FGFR1        | 534.0136872 | -0.991203822 | 0.121820289 | 4.20E-17    | 2.03E-15    |
| GADD45B      | 983.7292276 | -0.989506501 | 0.104108663 | 2.21E-22    | 1.62E-20    |
| HSPA1B       | 2027.499827 | -0.987031042 | 0.121548126 | 4.91E-17    | 2.36E-15    |
| SNHG20       | 35.61068516 | 0.985621865  | 0.37847756  | 0.000685592 | 0.004296923 |
| SULT1A1      | 356.4559536 | -0.984856555 | 0.136556599 | 5.81E-14    | 2.13E-12    |
| TCF4         | 4862.035065 | 0.984712743  | 0.102677788 | 9.01E-23    | 6.84E-21    |
| AK8          | 18.0494313  | 0.984051059  | 0.853221519 | 0.008374804 | 0.035192059 |
| CTSH         | 219.8646018 | 0.98370502   | 0.155823312 | 2.77E-11    | 7.21E-10    |
| QPRT         | 688.943642  | -0.980109125 | 0.119725486 | 2.97E-17    | 1.46E-15    |
| AKAP6        | 124.4946242 | -0.977713381 | 0.211036781 | 3.38E-07    | 4.69E-06    |
| RUNX1        | 341.5170047 | 0.977472564  | 0.159949882 | 9.74E-11    | 2.33E-09    |
| DNAJB4       | 190.9937856 | -0.976888888 | 0.181537274 | 7.12E-09    | 1.29E-07    |
| ZFP14        | 65.6036324  | 0.976594263  | 0.276704126 | 3.59E-05    | 0.000320718 |
| CPS1         | 18.40859178 | -0.974356126 | 0.664134803 | 0.006788724 | 0.029709461 |
| WNT10B       | 990.0130503 | -0.974215257 | 0.094418837 | 6.62E-26    | 5.82E-24    |
| MBOAT1       | 225.0737405 | 0.97324838   | 0.153733225 | 2.45E-11    | 6.44E-10    |
| HSPA1A       | 1286.051071 | -0.972569263 | 0.149391654 | 7.83E-12    | 2.23E-10    |
| LOC101929322 | 24.7722714  | 0.972382822  | 0.522361582 | 0.003613388 | 0.017596469 |
| DUSP16       | 1903.883084 | -0.971739807 | 0.079054826 | 1.10E-35    | 1.76E-33    |
| REPS2        | 41.6171579  | 0.969609806  | 0.368283179 | 0.000637245 | 0.0040348   |
| FGF9         | 15.64273856 | 0.969404579  | 0.763730175 | 0.008028767 | 0.034010312 |
| PRKCA        | 1020.118408 | -0.969399185 | 0.101414894 | 1.24E-22    | 9.24E-21    |
| AIM2         | 1452.961777 | 0.96864557   | 0.096608821 | 1.23E-24    | 1.03E-22    |
| SLCO3A1      | 813.8634909 | 0.967533787  | 0.101583216 | 1.81E-22    | 1.34E-20    |
| CPED1        | 27.61059672 | 0.966623853  | 0.479752377 | 0.002708785 | 0.013856492 |
| CASKIN1      | 13.73080036 | -0.965797032 | 0.691447307 | 0.007594895 | 0.032538546 |
| TNNT1        | 184.660082  | -0.963131094 | 0.172806264 | 2.65E-09    | 5.22E-08    |
| BOLA2B       | 1002.221392 | 0.962822557  | 0.102890684 | 8.72E-22    | 6.19E-20    |
| HOMER1       | 569.3616997 | -0.962762045 | 0.160557977 | 1.99E-10    | 4.54E-09    |
| LOC105369147 | 27.82102202 | -0.959228131 | 0.455513404 | 0.002317072 | 0.012162699 |
| SMARCA2      | 1364.886911 | 0.9581086    | 0.094351763 | 3.33E-25    | 2.84E-23    |
| YPEL1        | 78.43616469 | 0.956258394  | 0.24292889  | 7.76E-06    | 8.01E-05    |
| PLPP1        | 153.3125739 | 0.95521212   | 0.201470304 | 2.08E-07    | 2.98E-06    |
| LOC107986196 | 60.67585911 | -0.954277576 | 0.32050584  | 0.000232263 | 0.001671004 |
| ADAMTS10     | 90.74646023 | 0.954261141  | 0.232363416 | 3.76E-06    | 4.15E-05    |
| AGO4         | 353.5556997 | 0.953393375  | 0.12866812  | 1.32E-14    | 5.11E-13    |
| EZR          | 17961.87009 | -0.953223018 | 0.083335404 | 3.22E-31    | 4.01E-29    |
| PIK3CG       | 4818.165801 | -0.95299524  | 0.086843512 | 5.54E-29    | 5.89E-27    |
| DDIT4        | 4094.565481 | -0.952586571 | 0.099494809 | 1.14E-22    | 8.54E-21    |
| P2RX7        | 754.2488814 | 0.952245276  | 0.09850541  | 4.45E-23    | 3.47E-21    |
| ALOX5AP      | 3886.425623 | 0.951267219  | 0.077244882 | 7.71E-36    | 1.25E-33    |

|              |             |              |             |             |             |
|--------------|-------------|--------------|-------------|-------------|-------------|
| LOC105373428 | 346.8976757 | -0.950390603 | 0.126654706 | 6.67E-15    | 2.68E-13    |
| ZNF227       | 270.956139  | 0.948909722  | 0.147216143 | 1.20E-11    | 3.32E-10    |
| COL27A1      | 15.59694599 | -0.948756553 | 0.62350831  | 0.006708577 | 0.029396565 |
| SLC2A6       | 278.3563827 | 0.948232289  | 0.178932798 | 1.18E-08    | 2.08E-07    |
| ZNF215       | 133.617298  | -0.946170842 | 0.209498505 | 6.42E-07    | 8.42E-06    |
| KSR1         | 25.85675934 | 0.945078789  | 0.505958004 | 0.003692841 | 0.017872813 |
| LOC105371773 | 74.49201584 | 0.944816385  | 0.251477484 | 1.60E-05    | 0.000155232 |
| IZUMO4       | 108.3229074 | -0.944015139 | 0.24058557  | 8.56E-06    | 8.76E-05    |
| SOCS3        | 103.4270306 | -0.943482409 | 0.216504501 | 1.32E-06    | 1.62E-05    |
| TFCP2        | 770.9467579 | 0.940904678  | 0.10505787  | 3.56E-20    | 2.29E-18    |
| MLLT3        | 627.3225158 | 0.940782881  | 0.115119582 | 3.24E-17    | 1.58E-15    |
| L3MBTL3      | 25.11411146 | 0.940430906  | 0.502091666 | 0.003682953 | 0.017839913 |
| PLEC         | 1694.150557 | 0.939904553  | 0.133393768 | 1.93E-13    | 6.67E-12    |
| PTPRG        | 128.8999694 | 0.93911367   | 0.219831037 | 1.88E-06    | 2.24E-05    |
| ELK3         | 1009.756867 | 0.938734231  | 0.103896936 | 1.69E-20    | 1.10E-18    |
| ENC1         | 306.6149395 | -0.938358054 | 0.147119612 | 2.02E-11    | 5.40E-10    |
| NAV2         | 22.25252627 | 0.936985757  | 0.498932713 | 0.003744376 | 0.018066693 |
| MPP2         | 156.5564412 | 0.936918515  | 0.176618458 | 1.19E-08    | 2.08E-07    |
| DDN          | 609.6509557 | -0.936136963 | 0.10921197  | 1.18E-18    | 6.40E-17    |
| ARL4C        | 5199.932557 | 0.936102265  | 0.066776105 | 1.34E-45    | 3.09E-43    |
| FGD3         | 230.0563666 | 0.935964268  | 0.16451944  | 1.33E-09    | 2.75E-08    |
| DOCK8        | 706.399754  | -0.93579402  | 0.108084651 | 5.39E-19    | 3.03E-17    |
| ITPKC        | 136.1495368 | -0.931990438 | 0.204970758 | 5.65E-07    | 7.48E-06    |
| IRAG2        | 3721.5817   | 0.930685511  | 0.078848704 | 4.20E-33    | 5.77E-31    |
| CBLB         | 368.6750503 | 0.928152128  | 0.121581694 | 2.50E-15    | 1.05E-13    |
| SH2D5        | 61.7600699  | -0.927897044 | 0.30476302  | 0.000207231 | 0.001507189 |
| IL1RAP       | 333.9044143 | 0.927061484  | 0.148162491 | 4.09E-11    | 1.04E-09    |
| TMC5         | 10.55716173 | -0.926256531 | 1.102913224 | 0.01145524  | 0.045466513 |
| FCRL5        | 696.0956575 | 0.926041883  | 0.106627848 | 4.25E-19    | 2.41E-17    |
| APBA1        | 21.77595203 | -0.924175257 | 0.54418528  | 0.005092829 | 0.02343053  |
| CLDN12       | 364.2813412 | -0.92359376  | 0.1623407   | 1.31E-09    | 2.70E-08    |
| JAM3         | 145.418882  | 0.919949848  | 0.189514704 | 1.27E-07    | 1.90E-06    |
| FNBP1L       | 153.6293528 | 0.919849528  | 0.176680942 | 2.01E-08    | 3.42E-07    |
| BCL2L11      | 7450.204258 | -0.919122829 | 0.079249833 | 4.83E-32    | 6.38E-30    |
| CR2          | 49.90572684 | -0.918369315 | 0.331139407 | 0.000479562 | 0.003144479 |
| ZNF550       | 90.84176344 | 0.917445839  | 0.240104325 | 1.28E-05    | 0.000126884 |
| FBXO27       | 26.91798586 | 0.915716295  | 0.449068095 | 0.002873221 | 0.014565056 |
| HIPK2        | 1353.063331 | -0.915119967 | 0.098367356 | 1.48E-21    | 1.03E-19    |
| KCNQ1        | 532.9038214 | 0.914897419  | 0.138128732 | 3.89E-12    | 1.14E-10    |
| CAV2         | 26.1994115  | 0.913488455  | 0.52350383  | 0.004720336 | 0.022009171 |
| LOC124907740 | 12.58006916 | 0.912646685  | 0.944337149 | 0.010788939 | 0.043298276 |
| ANKRD13B     | 137.6737093 | -0.911275731 | 0.199684227 | 5.37E-07    | 7.16E-06    |
| FBXO6        | 164.0591924 | 0.910473884  | 0.208087004 | 1.24E-06    | 1.53E-05    |
| BTG4         | 71.98593036 | -0.910168198 | 0.292730651 | 0.000175208 | 0.001299391 |
| TMEM54       | 171.5083215 | 0.908570285  | 0.202531107 | 7.55E-07    | 9.76E-06    |
| AGRN         | 381.757639  | -0.907712189 | 0.162429048 | 2.54E-09    | 5.01E-08    |
| CYRIA        | 44.844334   | 0.906217896  | 0.364636528 | 0.001019087 | 0.006037473 |
| SLC30A4      | 38.10382079 | 0.906198571  | 0.353515616 | 0.000858714 | 0.005212178 |
| TUBB8B       | 44.63851111 | 0.905292311  | 0.326987964 | 0.000484744 | 0.003171256 |
| LOC100288073 | 4262.472444 | -0.904323535 | 0.073972746 | 2.65E-35    | 4.02E-33    |

|              |             |              |             |             |             |
|--------------|-------------|--------------|-------------|-------------|-------------|
| TMEM74       | 22.25343622 | 0.903526208  | 0.516645137 | 0.004874957 | 0.022614421 |
| LINC01801    | 15.03209117 | 0.902833594  | 0.665301906 | 0.008471695 | 0.035513032 |
| MAML2        | 53.44804459 | 0.902498148  | 0.299736794 | 0.000237467 | 0.001702536 |
| SESN1        | 1073.887433 | -0.901954653 | 0.094096298 | 1.10E-22    | 8.26E-21    |
| SLC16A14     | 309.1076173 | -0.900013581 | 0.139396083 | 1.23E-11    | 3.40E-10    |
| H2BC12       | 1262.413359 | -0.899029512 | 0.104509403 | 8.73E-19    | 4.78E-17    |
| MYCL         | 38.94339069 | 0.898969457  | 0.370556949 | 0.001220509 | 0.007031125 |
| ZNF792       | 71.10156803 | 0.897823848  | 0.255635065 | 4.36E-05    | 0.000380058 |
| RASAL1       | 49.72739801 | -0.897417985 | 0.308284021 | 0.000332004 | 0.002279664 |
| BOLA2        | 752.0842301 | 0.897294356  | 0.105615043 | 2.32E-18    | 1.23E-16    |
| EPHB6        | 111.2852587 | 0.897043286  | 0.217419029 | 3.73E-06    | 4.13E-05    |
| SNHG26       | 51.7346884  | -0.896090188 | 0.334335369 | 0.0006526   | 0.004119971 |
| DEPDC1       | 591.5288949 | 0.895368693  | 0.142867216 | 4.02E-11    | 1.02E-09    |
| UBC          | 58333.65936 | -0.895342754 | 0.065128577 | 8.00E-44    | 1.69E-41    |
| SLC1A1       | 14.55073338 | 0.895271306  | 0.681016747 | 0.008977678 | 0.037252513 |
| IFI30        | 9242.083425 | -0.895146628 | 0.083297436 | 7.33E-28    | 7.42E-26    |
| SNX24        | 94.01293862 | 0.893471971  | 0.244376135 | 2.56E-05    | 0.000236799 |
| SLC2A14      | 119.7875598 | -0.893024542 | 0.214616545 | 3.34E-06    | 3.73E-05    |
| PRKCQ        | 94.5499715  | 0.891628438  | 0.250654463 | 3.65E-05    | 0.000325095 |
| UBE2L6       | 1840.520213 | 0.891036147  | 0.078818876 | 1.49E-30    | 1.79E-28    |
| ICA1         | 393.1882792 | -0.890805287 | 0.125686081 | 1.65E-13    | 5.75E-12    |
| NCAM1        | 712.1590273 | -0.890481405 | 0.107519444 | 1.38E-17    | 6.95E-16    |
| ABCG1        | 273.3647945 | 0.889831304  | 0.144367313 | 8.09E-11    | 1.96E-09    |
| LOC105369593 | 177.4692785 | -0.889342155 | 0.166972501 | 1.14E-08    | 2.01E-07    |
| INPP5E       | 103.7521171 | 0.889142866  | 0.254435888 | 4.56E-05    | 0.000395689 |
| KIAA0513     | 141.3778006 | -0.888281056 | 0.187657661 | 2.47E-07    | 3.50E-06    |
| CDC14A       | 107.5904893 | 0.887258333  | 0.225635659 | 8.76E-06    | 8.94E-05    |
| TNFSF10      | 29.97311655 | 0.887082378  | 0.432950412 | 0.00287582  | 0.014570093 |
| CDH17        | 994.3966146 | 0.88700929   | 0.094291751 | 6.17E-22    | 4.42E-20    |
| TMEM169      | 104.1332034 | -0.886758499 | 0.210630025 | 2.75E-06    | 3.13E-05    |
| ST3GAL6      | 1161.166952 | -0.886364994 | 0.139001922 | 2.07E-11    | 5.50E-10    |
| NUAK2        | 675.375647  | 0.885715146  | 0.119811665 | 1.68E-14    | 6.50E-13    |
| TBC1D2       | 32.75531638 | 0.883075057  | 0.397293343 | 0.002031815 | 0.010872972 |
| CD180        | 398.1628484 | -0.882939028 | 0.125585167 | 2.34E-13    | 8.04E-12    |
| NIBAN1       | 1304.371282 | 0.882874814  | 0.095653615 | 3.16E-21    | 2.14E-19    |
| MEF2D        | 4628.966116 | -0.882856172 | 0.072037039 | 1.85E-35    | 2.89E-33    |
| LOC124905143 | 17.70425588 | 0.882289588  | 0.62312652  | 0.007978755 | 0.033831563 |
| MLLT11       | 187.8729356 | -0.88220623  | 0.169264014 | 2.07E-08    | 3.50E-07    |
| CTNNA2       | 200.2991164 | 0.882146697  | 0.155790492 | 1.69E-09    | 3.43E-08    |
| SATB1        | 18.22505185 | 0.880956969  | 0.585316214 | 0.007314272 | 0.031562735 |
| STK17A       | 1863.846799 | 0.880733933  | 0.081431557 | 3.45E-28    | 3.58E-26    |
| TTYH3        | 233.9843874 | 0.88008127   | 0.173499189 | 4.40E-08    | 7.14E-07    |
| FAM72D       | 553.4875257 | 0.879925189  | 0.128768022 | 9.40E-13    | 3.02E-11    |
| KIAA1671     | 96.38372096 | -0.879325388 | 0.248762134 | 4.00E-05    | 0.000352439 |
| CCND2        | 13433.13858 | -0.878466458 | 0.110786993 | 2.77E-16    | 1.28E-14    |
| RPGRIP1L     | 110.9682269 | -0.877512217 | 0.233956214 | 1.90E-05    | 0.000181662 |
| RHEBL1       | 314.7119639 | 0.876911937  | 0.129908602 | 1.75E-12    | 5.45E-11    |
| CALHM2       | 46.33822068 | 0.876525381  | 0.317276496 | 0.000518234 | 0.003369981 |
| RPL37AP5     | 49.73216356 | 0.876507248  | 0.392177613 | 0.001958166 | 0.010550579 |
| ENTPD1       | 634.0556888 | -0.874910147 | 0.108723403 | 1.05E-16    | 4.99E-15    |

|              |             |              |             |             |             |
|--------------|-------------|--------------|-------------|-------------|-------------|
| PXDN         | 498.6358122 | 0.874753469  | 0.122909208 | 1.31E-13    | 4.63E-12    |
| PRUNE2       | 52.39864972 | 0.8744226633 | 0.305222895 | 0.000384574 | 0.002595348 |
| ESR2         | 16.45888575 | -0.873746483 | 0.716367074 | 0.009904175 | 0.040488811 |
| CHST2        | 281.1717707 | -0.871580128 | 0.161341601 | 7.79E-09    | 1.41E-07    |
| JAKMIP3      | 43.48587845 | -0.870906023 | 0.345705645 | 0.001040765 | 0.006144877 |
| CEACAM1      | 34.86204962 | 0.870448565  | 0.408993052 | 0.002513828 | 0.013029619 |
| UBE2Q2P2     | 26.1499167  | 0.869973802  | 0.44466705  | 0.003616898 | 0.017608611 |
| HBD          | 34.30166456 | -0.869854135 | 0.407514174 | 0.002600155 | 0.013372996 |
| APOBEC3D     | 466.0670115 | 0.869406934  | 0.111904089 | 9.44E-16    | 4.18E-14    |
| PPP4R4       | 14.12222667 | 0.869277793  | 0.758780142 | 0.010833698 | 0.043447694 |
| LOC105374122 | 14.65816461 | 0.868985799  | 0.713582063 | 0.010150191 | 0.041289841 |
| KCTD12       | 1341.857572 | -0.867843826 | 0.125876067 | 6.45E-13    | 2.11E-11    |
| PIEZO1       | 1643.381713 | -0.8667028   | 0.111613371 | 9.89E-16    | 4.37E-14    |
| JADE2        | 289.1773028 | 0.866460935  | 0.168018741 | 2.87E-08    | 4.76E-07    |
| ARAP2        | 188.6389225 | 0.865995703  | 0.183668296 | 2.62E-07    | 3.72E-06    |
| TMEM119      | 28.51616266 | 0.8659849    | 0.439004713 | 0.003528425 | 0.017260379 |
| MIR5047      | 58.30534627 | -0.865486853 | 0.295892444 | 0.000335054 | 0.00229787  |
| SEZ6L2       | 651.6639941 | -0.865386419 | 0.131918018 | 6.50E-12    | 1.86E-10    |
| MAP2K6       | 322.9547126 | 0.863210729  | 0.132266784 | 7.91E-12    | 2.25E-10    |
| LOC105379549 | 12.7398634  | 0.862515659  | 0.829189887 | 0.011654592 | 0.046011936 |
| LARP1B       | 1043.380894 | -0.862264162 | 0.092066785 | 9.48E-22    | 6.67E-20    |
| L1CAM        | 91.06024731 | 0.862089602  | 0.23598442  | 2.71E-05    | 0.000249363 |
| SLC43A2      | 877.0100825 | -0.862034284 | 0.111317489 | 1.21E-15    | 5.28E-14    |
| KLKB1        | 23.49313946 | 0.861477064  | 0.533177032 | 0.00641897  | 0.028349224 |
| GPR153       | 30.91166905 | -0.860672151 | 0.433904038 | 0.003643798 | 0.017709696 |
| SEMA3C       | 205.4659407 | 0.860513699  | 0.214558181 | 6.32E-06    | 6.64E-05    |
| HSPA5P1      | 2111.764589 | -0.860236354 | 0.083596392 | 9.52E-26    | 8.28E-24    |
| ZBED8        | 31.78858677 | 0.859631907  | 0.404823955 | 0.00266665  | 0.013670331 |
| ZFP36L1      | 487.8059889 | -0.857598364 | 0.135599829 | 2.99E-11    | 7.77E-10    |
| CILK1        | 426.0919667 | 0.85733697   | 0.142193283 | 1.90E-10    | 4.35E-09    |
| TET1         | 306.674584  | 0.857239368  | 0.150702694 | 1.47E-09    | 3.00E-08    |
| COX18        | 254.4943795 | -0.856808621 | 0.14634013  | 5.81E-10    | 1.26E-08    |
| C17orf67     | 27.73371329 | 0.85678829   | 0.425734729 | 0.003340221 | 0.016521736 |
| VPS9D1-AS1   | 126.970486  | -0.856549523 | 0.209208601 | 4.89E-06    | 5.28E-05    |
| LOC388242    | 11.16580471 | 0.856239238  | 0.837355789 | 0.011918988 | 0.046792365 |
| LOC613038    | 11.16580471 | 0.856239238  | 0.837355789 | 0.011918988 | 0.046792365 |
| SULT1A2      | 69.0045149  | -0.854770153 | 0.266898326 | 0.000139724 | 0.001064195 |
| APOM         | 49.36609969 | -0.854414721 | 0.321357598 | 0.000739069 | 0.004595628 |
| SEMA7A       | 716.1588932 | -0.853827961 | 0.097601687 | 2.78E-19    | 1.62E-17    |
| PLEKHA7      | 380.8705516 | -0.853766476 | 0.128323358 | 3.54E-12    | 1.05E-10    |
| GRM3         | 251.1091637 | 0.851400043  | 0.16598438  | 3.37E-08    | 5.55E-07    |
| PTPRO        | 40.25533406 | 0.851048562  | 0.344067807 | 0.00117523  | 0.006817909 |
| CRACR2B      | 146.9025449 | -0.850192903 | 0.194459982 | 1.45E-06    | 1.76E-05    |
| SESN3        | 69.2978303  | 0.849590938  | 0.285877395 | 0.00028114  | 0.001966279 |
| CHST14       | 219.3331175 | 0.849368834  | 0.157377955 | 8.14E-09    | 1.47E-07    |
| LOC105371480 | 12.21604721 | 0.847700987  | 0.78902169  | 0.011618296 | 0.045892799 |
| RRM2P3       | 507.800487  | -0.847511138 | 0.112371652 | 5.67E-15    | 2.29E-13    |
| IRF2BPL      | 141.4446559 | 0.846737017  | 0.182904813 | 4.18E-07    | 5.67E-06    |
| CHST4        | 263.0945103 | -0.845788355 | 0.138509405 | 1.28E-10    | 3.00E-09    |
| DNAAF4       | 18.19771128 | -0.845689396 | 0.619281338 | 0.009115581 | 0.03771912  |

|              |             |              |             |             |             |
|--------------|-------------|--------------|-------------|-------------|-------------|
| SNHG8        | 1355.431106 | -0.844884337 | 0.099852165 | 3.52E-18    | 1.84E-16    |
| SLC39A14     | 8968.505082 | -0.844015608 | 0.067040648 | 3.19E-37    | 5.36E-35    |
| SNORD29      | 12.91917151 | -0.843145581 | 0.813330767 | 0.012006933 | 0.047073593 |
| LOC124900608 | 10.20720136 | 0.84141951   | 1.043756253 | 0.012577375 | 0.04895536  |
| DISP2        | 27.31743101 | -0.840584757 | 0.453574248 | 0.004846129 | 0.022504806 |
| PSRC1        | 72.43748177 | 0.84025715   | 0.29441502  | 0.000419451 | 0.002798087 |
| SEC24D       | 3962.117794 | -0.839640156 | 0.067906555 | 5.23E-36    | 8.55E-34    |
| NUDT6        | 83.6985453  | -0.83942522  | 0.24197444  | 5.62E-05    | 0.000477811 |
| FAM72A       | 350.1314812 | 0.838943912  | 0.140034246 | 2.50E-10    | 5.63E-09    |
| DYRK3        | 151.9994019 | 0.838714471  | 0.194586079 | 1.90E-06    | 2.25E-05    |
| SPRR2A       | 448.0393016 | 0.837727287  | 0.123466727 | 1.43E-12    | 4.48E-11    |
| CCR7         | 28.30729896 | -0.837008282 | 0.543446963 | 0.007875447 | 0.033491723 |
| VPS35L       | 969.2771373 | -0.836191062 | 0.089172781 | 9.11E-22    | 6.44E-20    |
| USO1         | 2896.183654 | -0.835634592 | 0.091475867 | 8.35E-21    | 5.48E-19    |
| PVT1         | 340.5239354 | -0.835443881 | 0.138423027 | 2.06E-10    | 4.68E-09    |
| LOC124902966 | 9.119244793 | 0.835012094  | 1.224476695 | 0.012847175 | 0.049759457 |
| HSPA5        | 124298.6526 | -0.834044504 | 0.061489393 | 8.84E-43    | 1.78E-40    |
| SLC25A35     | 28.42813768 | 0.833567872  | 0.471803057 | 0.005445033 | 0.024741969 |
| ABCA1        | 65.43089975 | 0.833215078  | 0.280029301 | 0.000290824 | 0.002028269 |
| SEL1L3       | 429.1247035 | 0.832923854  | 0.142625479 | 6.53E-10    | 1.41E-08    |
| CPEB3        | 179.1233811 | 0.832178607  | 0.200917713 | 3.83E-06    | 4.22E-05    |
| ZNF724       | 62.3324107  | 0.83156277   | 0.277046831 | 0.000272236 | 0.001913277 |
| CALHM1       | 419.3644038 | 0.831382206  | 0.124385448 | 2.99E-12    | 8.98E-11    |
| SQSTM1       | 60981.00799 | -0.831196598 | 0.098550464 | 9.84E-19    | 5.37E-17    |
| PNRC1        | 1865.019743 | -0.83080935  | 0.094563157 | 2.00E-19    | 1.18E-17    |
| PRKCG        | 48.64646947 | 0.830312683  | 0.311846345 | 0.000745563 | 0.004629224 |
| CSF2RB       | 9.709319406 | -0.829681804 | 1.164849472 | 0.01330944  | 0.051388979 |
| YOD1         | 468.1020717 | -0.828858538 | 0.197707158 | 3.12E-06    | 3.52E-05    |
| FAM110A      | 127.051971  | 0.828193676  | 0.246571344 | 8.37E-05    | 0.000678871 |
| SPG7         | 852.3277537 | -0.827396991 | 0.108853682 | 3.97E-15    | 1.64E-13    |
| APOL1        | 158.0103102 | 0.82639325   | 0.186830332 | 1.13E-06    | 1.41E-05    |
| MAST3        | 219.2124321 | 0.825010097  | 0.162458008 | 4.62E-08    | 7.44E-07    |
| LMF1         | 86.1910172  | -0.824773296 | 0.276860843 | 0.000301447 | 0.002093284 |
| LOC124901083 | 367.2898211 | -0.82403728  | 0.129932575 | 2.82E-11    | 7.33E-10    |
| ACSL1        | 506.2560261 | 0.823588744  | 0.107413063 | 2.28E-15    | 9.60E-14    |
| FBXO16       | 53.77195885 | -0.82350063  | 0.314667284 | 0.00088124  | 0.005324436 |
| SAMD9L       | 1790.727664 | 0.823471815  | 0.099455406 | 1.55E-17    | 7.79E-16    |
| BRD2         | 9571.690836 | -0.823212474 | 0.066552424 | 5.13E-36    | 8.45E-34    |
| ZNF362       | 116.1528193 | 0.822831188  | 0.249902824 | 0.000104167 | 0.00082519  |
| PDCD1        | 30.30863952 | -0.822344794 | 0.444265093 | 0.004974346 | 0.022976995 |
| CDC25A       | 2666.605065 | -0.821234704 | 0.071283032 | 1.41E-31    | 1.80E-29    |
| CRYBG1       | 367.9953897 | 0.819817084  | 0.121442849 | 1.89E-12    | 5.84E-11    |
| FAM78B       | 247.5106596 | -0.818884019 | 0.152676067 | 1.03E-08    | 1.85E-07    |
| DOK3         | 260.024611  | -0.818767515 | 0.16360586  | 7.01E-08    | 1.09E-06    |
| SNHG4        | 147.8649985 | -0.81853555  | 0.184383081 | 1.11E-06    | 1.38E-05    |
| MAGEH1       | 960.3219504 | -0.817436434 | 0.09652219  | 3.25E-18    | 1.70E-16    |
| RENBP        | 492.3575823 | -0.815630303 | 0.110918774 | 2.58E-14    | 9.86E-13    |
| HEY2         | 32.19460916 | 0.814954641  | 0.401671695 | 0.003522407 | 0.017235805 |
| DAPP1        | 962.7759118 | -0.814387034 | 0.112557648 | 6.08E-14    | 2.22E-12    |
| LDLRAD4      | 316.5129195 | 0.814097235  | 0.14949917  | 6.51E-09    | 1.19E-07    |

|              |             |              |             |             |             |
|--------------|-------------|--------------|-------------|-------------|-------------|
| BANK1        | 15.2719155  | -0.8140186   | 0.663927149 | 0.011508556 | 0.045636285 |
| HOXC6        | 27.5914215  | 0.812344697  | 0.462389002 | 0.005801911 | 0.026042428 |
| FAM72C       | 405.5791291 | 0.812083463  | 0.128686811 | 3.50E-11    | 9.00E-10    |
| GSN          | 86.56508402 | 0.810974397  | 0.235599191 | 6.44E-05    | 0.000539967 |
| BDH2         | 455.6560844 | -0.80903571  | 0.117722324 | 8.51E-13    | 2.75E-11    |
| ACVR1B       | 499.6136221 | 0.808471717  | 0.119829768 | 2.01E-12    | 6.17E-11    |
| LMO7         | 233.5295686 | 0.807969906  | 0.165154893 | 1.22E-07    | 1.84E-06    |
| SERTAD1      | 571.4124669 | -0.807854221 | 0.142181689 | 1.77E-09    | 3.57E-08    |
| SORBS3       | 197.6688946 | -0.807816204 | 0.163748112 | 1.03E-07    | 1.56E-06    |
| SMAGP        | 613.6650866 | 0.807779864  | 0.105662332 | 2.79E-15    | 1.17E-13    |
| ZSCAN31      | 21.24877118 | -0.807512753 | 0.729906035 | 0.011548652 | 0.045721995 |
| RSAD2        | 181.1439592 | 0.807417413  | 0.174588395 | 4.66E-07    | 6.26E-06    |
| TMSB4XP2     | 70.70805998 | 0.807198865  | 0.28058698  | 0.000418651 | 0.002794828 |
| MFSD3        | 77.11275645 | -0.807071009 | 0.279096345 | 0.000414284 | 0.002768874 |
| HOXB3        | 28.22727152 | 0.806243661  | 0.440590547 | 0.005195465 | 0.023845709 |
| TIGAR        | 1384.770587 | -0.805954618 | 0.100829029 | 1.81E-16    | 8.43E-15    |
| TPRN         | 372.119485  | 0.805164787  | 0.143381578 | 2.53E-09    | 5.01E-08    |
| SH3YL1       | 164.5879532 | -0.805132713 | 0.181667744 | 1.13E-06    | 1.41E-05    |
| KIF20A       | 1089.372702 | 0.803767293  | 0.098073634 | 3.39E-17    | 1.65E-15    |
| EPB41L4B     | 26.09698673 | -0.803218275 | 0.566148055 | 0.009835013 | 0.040272622 |
| STOX1        | 119.1346504 | 0.802912068  | 0.211250512 | 1.67E-05    | 0.000161396 |
| ID3          | 2067.196992 | -0.801660902 | 0.117439053 | 1.20E-12    | 3.79E-11    |
| C3orf80      | 31.30690201 | 0.801324258  | 0.451764219 | 0.005621317 | 0.025403015 |
| SDCBP2       | 21.73181931 | -0.801034443 | 0.540312925 | 0.008953211 | 0.037176718 |
| H1-10-AS1    | 23.43475639 | -0.800839884 | 0.478955527 | 0.007026577 | 0.030556806 |
| MIR3652      | 641.8950294 | -0.800720474 | 0.118417984 | 1.90E-12    | 5.85E-11    |
| SNORA4       | 24.00837052 | -0.800573072 | 0.517402306 | 0.008153285 | 0.034445092 |
| SYT13        | 82.87969039 | 0.800411177  | 0.240351655 | 9.85E-05    | 0.000785623 |
| OSTC         | 6749.445066 | -0.800051369 | 0.077340658 | 6.17E-26    | 5.45E-24    |
| ZBTB42       | 99.83536728 | 0.799327127  | 0.231438244 | 6.45E-05    | 0.000539967 |
| FCGBP        | 148.4205818 | 0.799068759  | 0.218399087 | 2.97E-05    | 0.000270823 |
| NT5C1A       | 66.98434859 | -0.798666125 | 0.29033415  | 0.000622713 | 0.003954639 |
| TNFRSF14-AS1 | 24.06407999 | 0.798525554  | 0.467749697 | 0.006528329 | 0.028744236 |
| CEL          | 57.03478945 | -0.797974918 | 0.306069171 | 0.000923646 | 0.005553742 |
| EIF3EP3      | 1200.529245 | -0.797906038 | 0.088917414 | 4.06E-20    | 2.57E-18    |
| ST6GALNAC5   | 21.01041849 | 0.795647118  | 0.6930289   | 0.011829035 | 0.046534168 |
| SMURF2P1     | 33.35158275 | 0.795352132  | 0.391143106 | 0.003631642 | 0.017670452 |
| SORL1        | 199.5367338 | 0.795301064  | 0.164944634 | 1.81E-07    | 2.62E-06    |
| CELSR1       | 80.80274773 | 0.794811781  | 0.24491382  | 0.000131006 | 0.001007831 |
| NICN1        | 92.63663201 | -0.794780687 | 0.231208902 | 6.88E-05    | 0.000572089 |
| CAPG         | 1468.960577 | 0.794633024  | 0.101478062 | 6.67E-16    | 3.04E-14    |
| DGCR11       | 14.65485219 | 0.794514648  | 0.793404974 | 0.013391619 | 0.051625704 |
| DEXI         | 213.9561882 | -0.794050241 | 0.157169488 | 5.86E-08    | 9.21E-07    |
| PLCL1        | 33.39710723 | 0.794016083  | 0.452695079 | 0.006041405 | 0.026963661 |
| LOC107987192 | 9.138739743 | -0.793931462 | 1.146866475 | 0.013939158 | 0.053285187 |
| MRPL1        | 1316.816234 | -0.793480172 | 0.094119935 | 4.83E-18    | 2.50E-16    |
| NCAM2        | 173.3073561 | -0.792434685 | 0.215489835 | 2.71E-05    | 0.000249091 |
| METTL7A      | 1387.892792 | 0.792099713  | 0.102148578 | 1.24E-15    | 5.39E-14    |
| CASP8        | 1515.758387 | 0.791908114  | 0.100601118 | 4.67E-16    | 2.14E-14    |
| STAT5A       | 361.7051247 | 0.791891951  | 0.135248922 | 6.42E-10    | 1.39E-08    |

|          |             |              |             |             |             |
|----------|-------------|--------------|-------------|-------------|-------------|
| CCNG1    | 7753.360676 | -0.790624748 | 0.097880716 | 1.00E-16    | 4.78E-15    |
| RASA4DP  | 96.51495383 | -0.789394383 | 0.221800637 | 4.51E-05    | 0.000391706 |
| USP6NL   | 562.5683203 | 0.78914049   | 0.128618833 | 1.12E-10    | 2.64E-09    |
| ZNF551   | 321.0566097 | 0.788803264  | 0.136258654 | 9.25E-10    | 1.95E-08    |
| BFSP2    | 17.17025923 | 0.787947747  | 0.611214131 | 0.011312333 | 0.045023136 |
| PAIP2B   | 120.2112018 | 0.786902336  | 0.216561362 | 3.37E-05    | 0.000302251 |
| ZNF530   | 151.8568184 | 0.786412562  | 0.190527131 | 4.50E-06    | 4.90E-05    |
| MINAR1   | 72.69879168 | -0.785706111 | 0.284367016 | 0.000601452 | 0.003837635 |
| SLC22A23 | 75.09005294 | 0.785334308  | 0.304419452 | 0.001006203 | 0.005973403 |
| FAM72B   | 276.5884087 | 0.785253611  | 0.15200758  | 3.09E-08    | 5.11E-07    |
| MTSS1    | 31.85262226 | 0.784616724  | 0.419825221 | 0.005038692 | 0.023243215 |
| SDC1     | 190359.9876 | -0.784404833 | 0.081006575 | 5.13E-23    | 3.95E-21    |
| SUGCT    | 8.640869249 | -0.784114959 | 1.697928699 | 0.013407405 | 0.051675055 |
| CCDC110  | 235.5910521 | -0.783528211 | 0.21812584  | 3.86E-05    | 0.000341118 |
| LIG4     | 518.9173949 | -0.783517114 | 0.138436677 | 1.96E-09    | 3.94E-08    |
| PLXNC1   | 3403.80757  | 0.783444733  | 0.070517118 | 1.57E-29    | 1.74E-27    |
| TBC1D16  | 408.4182947 | -0.782155727 | 0.118549825 | 5.85E-12    | 1.69E-10    |
| TBXAS1   | 35.94837402 | -0.780620491 | 0.390785747 | 0.004065719 | 0.019363602 |
| MGAT3    | 1952.218556 | -0.780099442 | 0.105887666 | 2.60E-14    | 9.88E-13    |
| NME7     | 160.6323055 | -0.779369046 | 0.176011404 | 1.23E-06    | 1.52E-05    |
| C12orf56 | 43.16130686 | 0.779182172  | 0.353817728 | 0.002599665 | 0.013372996 |
| SELENON  | 242.9619578 | 0.778339633  | 0.14398582  | 8.66E-09    | 1.56E-07    |
| DNAH17   | 15.7762061  | -0.778329921 | 0.704918361 | 0.0138071   | 0.052869389 |
| FHIT     | 119.5427364 | -0.778029602 | 0.199076986 | 1.18E-05    | 0.000118166 |
| CDIP1    | 1440.891656 | -0.777999361 | 0.0990665   | 6.20E-16    | 2.84E-14    |
| HMCES    | 1566.196877 | -0.777931507 | 0.099540663 | 8.13E-16    | 3.63E-14    |
| HMOX1    | 2322.87558  | -0.777931345 | 0.103332009 | 7.39E-15    | 2.94E-13    |
| SLC7A6   | 2172.465486 | -0.777903748 | 0.079596634 | 2.18E-23    | 1.72E-21    |
| CNTNAP1  | 344.4723703 | -0.777669649 | 0.14182593  | 5.75E-09    | 1.06E-07    |
| MAP3K1   | 1709.671823 | 0.777412608  | 0.104358241 | 1.28E-14    | 5.02E-13    |
| ITGB7    | 7521.676215 | 0.777370088  | 0.093208888 | 1.05E-17    | 5.33E-16    |
| RARA     | 464.1213719 | 0.77711794   | 0.139336657 | 3.27E-09    | 6.35E-08    |
| NFXL1    | 2357.119228 | 0.775912676  | 0.082270223 | 5.74E-22    | 4.12E-20    |
| SEMA4B   | 1205.654422 | 0.775581523  | 0.110249469 | 2.79E-13    | 9.47E-12    |
| NLRP7    | 56.88722944 | 0.775565629  | 0.291799408 | 0.000842174 | 0.005124358 |
| SMTN     | 59.5034334  | 0.775404162  | 0.306270079 | 0.001173067 | 0.006810374 |
| E2F5     | 508.8930304 | -0.775348579 | 0.112486909 | 7.64E-13    | 2.47E-11    |
| GPR18    | 91.46547222 | 0.775332501  | 0.238172572 | 0.000133208 | 0.001020689 |
| EMC3-AS1 | 52.79692952 | -0.774207823 | 0.307121303 | 0.001242117 | 0.007124201 |
| MGST1    | 2062.047232 | -0.7730251   | 0.088510611 | 3.59E-19    | 2.05E-17    |
| LYL1     | 40.16029657 | 0.772375333  | 0.404615433 | 0.00486668  | 0.022588125 |
| ISG20    | 1163.071572 | 0.772141514  | 0.093148024 | 1.65E-17    | 8.25E-16    |
| CDKN2D   | 51.62480725 | 0.77211482   | 0.325316272 | 0.00179589  | 0.009810546 |
| COL18A1  | 92.23901312 | 0.770546754  | 0.24680271  | 0.000209995 | 0.001524731 |
| PXN      | 708.7738897 | 0.770172301  | 0.106129547 | 5.74E-14    | 2.11E-12    |
| ZNF546   | 54.77767819 | 0.76994935   | 0.324688818 | 0.001786797 | 0.009763955 |
| ENPEP    | 116.6629529 | -0.769818531 | 0.233128697 | 0.000112729 | 0.000882913 |
| REEP3    | 647.9767107 | 0.769489224  | 0.140142612 | 5.22E-09    | 9.70E-08    |
| DNAH3    | 17.5514648  | -0.768702051 | 0.780233012 | 0.014199691 | 0.053995619 |
| PLPP5    | 908.6123865 | -0.768542061 | 0.094404152 | 5.82E-17    | 2.79E-15    |



|              |             |              |             |             |             |
|--------------|-------------|--------------|-------------|-------------|-------------|
| TNS1         | 9.827193931 | 0.768063486  | 1.326220048 | 0.013513398 | 0.051991003 |
| PARP12       | 473.3447024 | 0.767700018  | 0.127641185 | 2.54E-10    | 5.70E-09    |
| SLAMF7       | 4117.403045 | -0.764822529 | 0.067930244 | 3.17E-30    | 3.77E-28    |
| TUBA4A       | 4418.889515 | -0.763861944 | 0.086457688 | 1.51E-19    | 8.96E-18    |
| EIF3E        | 19712.08128 | -0.763845969 | 0.070872464 | 6.60E-28    | 6.74E-26    |
| SDC4         | 351.9582076 | 0.763254385  | 0.13246127  | 1.15E-09    | 2.39E-08    |
| MYLK         | 751.7175199 | -0.762897601 | 0.104880577 | 4.95E-14    | 1.84E-12    |
| ATXN7L1      | 31.48014061 | 0.76234629   | 0.411107716 | 0.005415595 | 0.024653485 |
| RNVU1-14     | 36.54691213 | 0.762194114  | 0.532430125 | 0.009846723 | 0.04029199  |
| MAN1C1       | 563.0810614 | 0.761095984  | 0.121055855 | 4.59E-11    | 1.15E-09    |
| PGGHG        | 182.6617686 | -0.760809816 | 0.194102584 | 1.18E-05    | 0.0001175   |
| GLMP         | 2431.401208 | -0.759611972 | 0.083595303 | 1.63E-20    | 1.06E-18    |
| SNORA68      | 17.48933751 | 0.759304184  | 0.587751939 | 0.011963197 | 0.046944638 |
| IRS1         | 749.8372678 | 0.7588372    | 0.099938208 | 4.59E-15    | 1.88E-13    |
| CKAP2L       | 539.5997118 | 0.7586559    | 0.120425707 | 4.15E-11    | 1.05E-09    |
| RRM2         | 19820.27348 | -0.758552846 | 0.06856937  | 3.28E-29    | 3.55E-27    |
| TMEM170B     | 142.1390857 | 0.758127095  | 0.243279075 | 0.000215669 | 0.001560038 |
| KIF3C        | 199.7652508 | 0.757467029  | 0.157988893 | 2.24E-07    | 3.21E-06    |
| NME4         | 1161.698835 | -0.757057179 | 0.104781007 | 7.58E-14    | 2.73E-12    |
| SNX18        | 2422.888103 | 0.755551524  | 0.115641857 | 9.15E-12    | 2.58E-10    |
| ATP8B3       | 64.16747066 | 0.755025689  | 0.272282254 | 0.000642865 | 0.004064437 |
| CEP68        | 579.7694418 | 0.754187029  | 0.102036153 | 2.15E-14    | 8.27E-13    |
| PTPN18       | 791.6191148 | 0.753411944  | 0.097685806 | 1.81E-15    | 7.72E-14    |
| RNF149       | 515.7360575 | 0.753365933  | 0.133117636 | 2.12E-09    | 4.25E-08    |
| PPCDC        | 339.3918135 | 0.753364169  | 0.135986342 | 4.33E-09    | 8.24E-08    |
| LINC02551    | 42.70437135 | 0.753231632  | 0.345727728 | 0.00292272  | 0.014747302 |
| ARMCX3       | 1278.58556  | -0.752978001 | 0.094136307 | 1.85E-16    | 8.60E-15    |
| REEP2        | 177.8714942 | -0.752678559 | 0.193614727 | 1.36E-05    | 0.000134049 |
| KLF6         | 4346.697527 | -0.75199137  | 0.07173047  | 1.59E-26    | 1.46E-24    |
| ARF4         | 4411.974842 | -0.75136097  | 0.111039599 | 1.95E-12    | 5.99E-11    |
| RAC3         | 1524.948206 | -0.750937805 | 0.091366847 | 3.14E-17    | 1.54E-15    |
| KLHL32       | 100.976759  | 0.750182304  | 0.245125829 | 0.000261281 | 0.001844515 |
| FAAP24       | 180.1476995 | 0.750106153  | 0.166334603 | 8.96E-07    | 1.14E-05    |
| ZNF296       | 370.9659256 | 0.749723081  | 0.15023686  | 8.51E-08    | 1.30E-06    |
| PKN3         | 49.17638976 | 0.747903216  | 0.343011536 | 0.002980278 | 0.014989154 |
| LOC105379362 | 141.2992252 | -0.747569924 | 0.195527872 | 1.79E-05    | 0.000171763 |
| BHLHE41      | 458.0992311 | 0.747408244  | 0.146218419 | 4.41E-08    | 7.14E-07    |
| AMPD3        | 336.9934546 | -0.746892979 | 0.128101876 | 8.33E-10    | 1.77E-08    |
| RFFL         | 482.8764094 | 0.746796408  | 0.115706577 | 1.61E-11    | 4.41E-10    |
| APOL2        | 303.9880875 | 0.745943667  | 0.145519572 | 4.18E-08    | 6.80E-07    |
| FAM111A-DT   | 13.60049536 | 0.744661615  | 0.739909737 | 0.01495327  | 0.056146091 |
| ASCC3        | 2236.290265 | -0.743698705 | 0.087973085 | 4.26E-18    | 2.21E-16    |
| TNFAIP8      | 1180.496147 | 0.743594315  | 0.134223398 | 4.22E-09    | 8.06E-08    |
| PRKCQ-AS1    | 168.1798299 | 0.743593433  | 0.180307762 | 5.09E-06    | 5.48E-05    |
| TFAP2A       | 23.05822193 | 0.743130337  | 0.517155559 | 0.010776977 | 0.043280362 |
| TEC          | 1232.965467 | 0.742831385  | 0.08354374  | 9.13E-20    | 5.56E-18    |
| FCER1G       | 43.62454823 | 0.742423293  | 0.367717073 | 0.004110258 | 0.019554216 |
| RBPM52       | 15.25797239 | 0.740700969  | 0.745131282 | 0.015076121 | 0.056530808 |
| GPNMB        | 239.4396951 | -0.740255904 | 0.148176031 | 8.52E-08    | 1.31E-06    |
| MANF         | 6204.97689  | -0.740107099 | 0.068638718 | 6.58E-28    | 6.74E-26    |

|               |             |              |             |             |             |
|---------------|-------------|--------------|-------------|-------------|-------------|
| IDI1          | 8806.786668 | -0.738635866 | 0.107384466 | 5.69E-13    | 1.87E-11    |
| CLIP2         | 47.0814177  | 0.738355838  | 0.369936971 | 0.004384083 | 0.020624602 |
| ZFPM2         | 8.424179327 | 0.737532045  | 1.558194767 | 0.013186492 | 0.050959717 |
| DKFZP586I1420 | 261.7066729 | 0.737470285  | 0.172410122 | 2.59E-06    | 2.98E-05    |
| SNORD68       | 27.5896769  | -0.737122891 | 0.460202372 | 0.008924182 | 0.037097988 |
| FNBP1         | 2004.457328 | 0.736731036  | 0.07772201  | 4.00E-22    | 2.92E-20    |
| FAT1          | 11.88040931 | 0.736697253  | 0.904942452 | 0.015280711 | 0.057152498 |
| SNX10         | 366.8524545 | 0.736652473  | 0.198869566 | 2.77E-05    | 0.000254443 |
| RGCC          | 392.5628524 | -0.736560385 | 0.136015204 | 9.26E-09    | 1.67E-07    |
| SSTR3         | 1618.577227 | 0.735626563  | 0.084031437 | 3.21E-19    | 1.85E-17    |
| SES2          | 2627.712654 | -0.734342361 | 0.110028441 | 3.77E-12    | 1.11E-10    |
| DDIT3         | 1906.24835  | -0.733971161 | 0.091246644 | 1.39E-16    | 6.50E-15    |
| TCAF1         | 195.7212708 | 0.733809637  | 0.169817042 | 2.19E-06    | 2.56E-05    |
| CALR          | 44845.41128 | -0.733790813 | 0.065313122 | 9.20E-30    | 1.04E-27    |
| PRDM11        | 203.8618304 | 0.733659072  | 0.175875975 | 4.28E-06    | 4.68E-05    |
| COPS4         | 1083.021509 | -0.733143356 | 0.096966293 | 6.19E-15    | 2.50E-13    |
| ADAM28        | 261.5268623 | 0.733023471  | 0.149478292 | 1.37E-07    | 2.04E-06    |
| MDFIC         | 1014.150944 | 0.732729306  | 0.161600292 | 8.07E-07    | 1.04E-05    |
| PLS1          | 220.9341643 | 0.732728725  | 0.186310951 | 1.14E-05    | 0.000114597 |
| ZNF385A       | 46.24319364 | 0.732606821  | 0.325305484 | 0.002587017 | 0.013321253 |
| IQSEC1        | 937.4233147 | -0.732059053 | 0.104403428 | 3.67E-13    | 1.23E-11    |
| ABCB6         | 265.6926678 | -0.731779718 | 0.190267672 | 1.70E-05    | 0.000164464 |
| KRBOX5        | 181.3499199 | -0.731555161 | 0.201352764 | 3.71E-05    | 0.00032895  |
| TRIP6         | 682.4091702 | -0.731391473 | 0.109891482 | 4.49E-12    | 1.32E-10    |
| SPPL2A        | 679.1737331 | 0.731098285  | 0.105583244 | 6.70E-13    | 2.19E-11    |
| PLXNB2        | 1116.225036 | -0.730777234 | 0.101771745 | 1.11E-13    | 3.94E-12    |
| GPSM2         | 432.8363335 | 0.730689274  | 0.115969107 | 4.49E-11    | 1.13E-09    |
| ITGA7         | 24.28105105 | 0.730474812  | 0.510309701 | 0.011266474 | 0.04488188  |
| COL9A2        | 43.42915682 | -0.730344253 | 0.365788619 | 0.004646404 | 0.021699509 |
| PATL2         | 13.17642681 | 0.730184142  | 0.746206947 | 0.015536244 | 0.057883206 |
| IKBIP         | 542.2633401 | -0.729837837 | 0.132016101 | 4.85E-09    | 9.11E-08    |
| TMEM198       | 124.9400475 | -0.72921556  | 0.224806261 | 0.000158675 | 0.001190541 |
| CMTM7         | 409.2464426 | -0.72909977  | 0.145515925 | 8.40E-08    | 1.29E-06    |
| C16orf95      | 187.0440278 | -0.728540586 | 0.198465824 | 3.39E-05    | 0.000303903 |
| ZFP41         | 70.87577193 | 0.728305705  | 0.265829514 | 0.000743749 | 0.004619622 |
| ISL1          | 21.88140881 | 0.728257301  | 0.550226194 | 0.012656946 | 0.049205692 |
| BCL6          | 91.68812948 | -0.728164118 | 0.246484189 | 0.000393471 | 0.002644058 |
| ZNF425        | 64.20738903 | -0.727887907 | 0.288680064 | 0.00134431  | 0.007625093 |
| ABHD8         | 58.73169455 | 0.726681291  | 0.29705771  | 0.001659603 | 0.009170179 |
| MXD3          | 74.69938082 | 0.726340428  | 0.325661549 | 0.002742067 | 0.014003058 |
| TPRG1         | 225.9868423 | 0.72618593   | 0.159384335 | 7.53E-07    | 9.74E-06    |
| CHST15        | 1331.705938 | 0.726101612  | 0.083916091 | 8.03E-19    | 4.44E-17    |
| CDH15         | 34.89073446 | -0.725706455 | 0.380505256 | 0.005632096 | 0.025445083 |
| APOC1         | 54.45784238 | -0.725195775 | 0.304238629 | 0.001991352 | 0.010687903 |
| SPATA2L       | 216.1379059 | -0.725078033 | 0.193722735 | 2.61E-05    | 0.000240973 |
| ITGB8         | 246.6165396 | -0.723943684 | 0.214985672 | 9.93E-05    | 0.000791265 |
| SH3BP5        | 1051.626161 | 0.722389666  | 0.095139961 | 4.81E-15    | 1.96E-13    |
| MTSS2         | 20.5522689  | -0.722088833 | 0.549372545 | 0.013337293 | 0.051462098 |
| RAB43         | 465.406416  | 0.722045227  | 0.126200106 | 1.64E-09    | 3.33E-08    |
| TXK           | 77.65014463 | 0.721853304  | 0.252332952 | 0.000527163 | 0.003415218 |

|              |             |              |             |             |             |
|--------------|-------------|--------------|-------------|-------------|-------------|
| TMEM178B     | 21.10852698 | 0.720795916  | 0.536579257 | 0.012667169 | 0.049227417 |
| ZNF85        | 77.14849148 | 0.720305767  | 0.310889155 | 0.002280807 | 0.011997795 |
| ITGB8-AS1    | 225.6676022 | -0.720223681 | 0.157527905 | 7.27E-07    | 9.44E-06    |
| UBAC1        | 1524.063832 | 0.71965662   | 0.087358239 | 2.82E-17    | 1.39E-15    |
| ADGRG5       | 640.3331782 | 0.719570457  | 0.121915451 | 5.61E-10    | 1.22E-08    |
| SCOC         | 341.4218573 | -0.719329387 | 0.231660212 | 0.000245883 | 0.001754412 |
| KDELR3       | 488.1267398 | -0.719308919 | 0.114742763 | 5.88E-11    | 1.45E-09    |
| IGHV1OR15-1  | 119.9881362 | 0.719244602  | 0.200422889 | 4.60E-05    | 0.000398892 |
| LOC102724760 | 119.9881362 | 0.719244602  | 0.200422889 | 4.60E-05    | 0.000398892 |
| PABPC1P3     | 27.89880592 | -0.71868729  | 0.600137046 | 0.013808872 | 0.052869389 |
| RSL1D1       | 5647.884187 | -0.717964264 | 0.066883451 | 1.17E-27    | 1.18E-25    |
| TJP3         | 101.5829302 | 0.717872934  | 0.230240181 | 0.000240289 | 0.00172088  |
| GPSM1        | 73.25119987 | 0.716513768  | 0.249815611 | 0.000529446 | 0.003427445 |
| ARID3B       | 441.0180016 | -0.716418601 | 0.116490032 | 1.25E-10    | 2.94E-09    |
| SYTL3        | 182.151833  | -0.716324898 | 0.164805637 | 2.09E-06    | 2.46E-05    |
| PXMP4        | 112.7590612 | 0.716246062  | 0.202993559 | 5.79E-05    | 0.000490573 |
| SGMS1        | 559.980646  | 0.716189436  | 0.127967816 | 3.32E-09    | 6.45E-08    |
| ARNTL        | 288.3733932 | 0.716135379  | 0.135138711 | 1.77E-08    | 3.02E-07    |
| FTL          | 128584.9825 | -0.715995685 | 0.081425699 | 2.27E-19    | 1.34E-17    |
| HABP4        | 51.06790023 | 0.715671454  | 0.300020403 | 0.001982853 | 0.010661027 |
| LETM2        | 77.38842046 | -0.715574717 | 0.28219662  | 0.001332267 | 0.007569185 |
| PTPRJ        | 106.8364725 | -0.715456057 | 0.218215239 | 0.000140778 | 0.00107064  |
| ELF4         | 329.4048386 | 0.71386817   | 0.134773278 | 1.82E-08    | 3.10E-07    |
| HIBCH        | 935.1909037 | -0.71355641  | 0.102790304 | 6.15E-13    | 2.02E-11    |
| PSMB8-AS1    | 234.7826224 | 0.713380486  | 0.154141159 | 5.58E-07    | 7.40E-06    |
| LOC732229    | 186.0681183 | -0.713359255 | 0.18163102  | 1.27E-05    | 0.000126119 |
| D2HGDH       | 115.9682708 | -0.713311383 | 0.202959071 | 6.32E-05    | 0.000531432 |
| SCNN1B       | 123.0180647 | 0.712969547  | 0.195130481 | 3.66E-05    | 0.000325832 |
| MCPH1-DT     | 41.20515367 | -0.712665247 | 0.345695567 | 0.004222792 | 0.020007136 |
| PDIA4        | 11979.98591 | -0.712643704 | 0.063941479 | 1.28E-29    | 1.43E-27    |
| EPS8         | 43.43780285 | -0.712347633 | 0.339817666 | 0.00394493  | 0.018881802 |
| HMGCS1       | 28065.39591 | -0.711784961 | 0.075068932 | 4.16E-22    | 3.03E-20    |
| RAB30        | 3618.861147 | -0.711543256 | 0.12216073  | 9.02E-10    | 1.90E-08    |
| SPOUT1       | 1014.308928 | 0.711156636  | 0.1110234   | 2.40E-11    | 6.30E-10    |
| MPG          | 549.0884669 | -0.711147185 | 0.134044079 | 1.81E-08    | 3.08E-07    |
| TRIAP1       | 1468.885456 | -0.711136292 | 0.082758956 | 1.42E-18    | 7.67E-17    |
| TNFAIP8L1    | 99.97929865 | 0.710094019  | 0.217393241 | 0.000149836 | 0.001134549 |
| TMEM217      | 29.76978327 | -0.709659412 | 0.413825569 | 0.008114731 | 0.034332468 |
| TNFRSF11A    | 1528.892728 | 0.708419193  | 0.079981129 | 1.35E-19    | 8.07E-18    |
| RAB37        | 1753.5347   | 0.707981473  | 0.083541771 | 3.93E-18    | 2.04E-16    |
| ABCD2        | 339.7475811 | 0.707853464  | 0.18366277  | 1.65E-05    | 0.000159638 |
| DNAJB1       | 6182.15646  | -0.707194148 | 0.10295037  | 9.92E-13    | 3.18E-11    |
| RARG         | 74.08243426 | 0.70701416   | 0.282423278 | 0.00148639  | 0.008332734 |
| RPL34        | 21789.24854 | -0.706733429 | 0.078704632 | 4.66E-20    | 2.93E-18    |
| LOC122539214 | 27.99694943 | 0.706367103  | 0.470362524 | 0.010770512 | 0.043274467 |
| MKLN1-AS     | 48.18286467 | -0.706065101 | 0.33283378  | 0.003714085 | 0.017948258 |
| PTP4A1       | 5277.769506 | -0.705636187 | 0.131619084 | 1.32E-08    | 2.29E-07    |
| GABARAPL1    | 224.7861894 | -0.705607383 | 0.153481798 | 6.63E-07    | 8.68E-06    |
| RPS21P4      | 48.34009761 | 0.705591885  | 0.379494129 | 0.006248467 | 0.027730576 |
| NR6A1        | 120.6695341 | -0.704621777 | 0.205551099 | 8.60E-05    | 0.000694494 |

|              |             |              |             |             |             |
|--------------|-------------|--------------|-------------|-------------|-------------|
| GALNS        | 672.5531621 | -0.704377727 | 0.119028272 | 5.38E-10    | 1.18E-08    |
| MAL2         | 48.25773536 | 0.703934414  | 0.31799006  | 0.0030389   | 0.015249094 |
| IRF2         | 1104.691681 | 0.703808209  | 0.102609831 | 1.10E-12    | 3.51E-11    |
| WNT10A       | 1536.413458 | -0.703783248 | 0.130211119 | 1.05E-08    | 1.87E-07    |
| BTN3A1       | 856.4212354 | 0.703542651  | 0.093123014 | 6.96E-15    | 2.79E-13    |
| HELZ2        | 304.5657274 | 0.70347463   | 0.196832056 | 5.02E-05    | 0.000430842 |
| SPINT2       | 1953.458992 | -0.702573937 | 0.111558844 | 5.01E-11    | 1.25E-09    |
| PUM3         | 1648.249138 | 0.701923196  | 0.07921637  | 1.36E-19    | 8.09E-18    |
| ZNF442       | 25.07463269 | 0.701343402  | 0.469049854 | 0.011242744 | 0.044805827 |
| FAM111A      | 747.3158669 | 0.70092349   | 0.124094752 | 2.57E-09    | 5.08E-08    |
| PPP1R15A     | 3695.523641 | -0.700885976 | 0.081605554 | 1.50E-18    | 8.09E-17    |
| PRAF2        | 245.177178  | -0.700666151 | 0.170504416 | 6.20E-06    | 6.53E-05    |
| HECW2        | 39.01055439 | 0.700483511  | 0.38222995  | 0.00657521  | 0.028928587 |
| SELENOK      | 1707.225957 | -0.700108541 | 0.07786059  | 4.19E-20    | 2.65E-18    |
| HMGA1        | 7718.870289 | -0.698826736 | 0.091308754 | 3.24E-15    | 1.34E-13    |
| SH3GLB2      | 2106.823145 | 0.698602465  | 0.111919904 | 6.98E-11    | 1.71E-09    |
| CBY2         | 84.69391031 | 0.698353778  | 0.24614852  | 0.00060483  | 0.003856345 |
| TBC1D4       | 597.0881416 | -0.698268994 | 0.110069637 | 3.69E-11    | 9.42E-10    |
| MFGE8        | 830.844094  | 0.697522101  | 0.108318381 | 1.99E-11    | 5.34E-10    |
| RAB15        | 54.01034174 | 0.697184482  | 0.304264339 | 0.002577385 | 0.013279554 |
| RCAN3        | 292.7602727 | 0.69693553   | 0.138510686 | 7.73E-08    | 1.19E-06    |
| EIF2AK3      | 8364.157791 | -0.696589509 | 0.062049193 | 5.28E-30    | 6.13E-28    |
| ORAI2        | 1926.395965 | 0.696553206  | 0.098621397 | 2.72E-13    | 9.24E-12    |
| OCIAD1       | 5924.291895 | -0.696539588 | 0.081968605 | 3.60E-18    | 1.88E-16    |
| MTAP         | 476.0556834 | -0.696534409 | 0.117960481 | 5.74E-10    | 1.25E-08    |
| LOC101929028 | 172.4511542 | -0.695548349 | 0.184325624 | 2.42E-05    | 0.000224731 |
| TRIM47       | 158.1338417 | -0.695330097 | 0.200606236 | 7.83E-05    | 0.000640734 |
| FTLP3        | 5080.267129 | -0.694604658 | 0.092497599 | 1.06E-14    | 4.19E-13    |
| EPAS1        | 34.77186655 | 0.694501114  | 0.402453968 | 0.008165874 | 0.034464645 |
| CLK1         | 1252.882368 | -0.694105218 | 0.092787942 | 1.23E-14    | 4.81E-13    |
| RAD51L3-RFFL | 435.1956769 | 0.693432834  | 0.116797677 | 4.77E-10    | 1.05E-08    |
| PABPC3       | 660.9341866 | -0.693319646 | 0.117388755 | 5.97E-10    | 1.30E-08    |
| SNAR-G1      | 10.53848811 | 0.693256784  | 1.128265952 | 0.015733662 | 0.058492879 |
| HJURP        | 2021.494476 | 0.692916196  | 0.081507494 | 3.18E-18    | 1.68E-16    |
| FZD4         | 37.94548726 | 0.692629203  | 0.370593754 | 0.006398511 | 0.028273287 |
| GPC1         | 108.7396264 | 0.69240118   | 0.226007892 | 0.000308343 | 0.00213583  |
| FAM86B2-DT   | 103.5604071 | -0.689823965 | 0.220464765 | 0.000249013 | 0.001774552 |
| PLCG2        | 2265.354633 | -0.689815565 | 0.072713877 | 4.19E-22    | 3.04E-20    |
| PTPA         | 3794.15037  | 0.689547004  | 0.099018232 | 5.55E-13    | 1.83E-11    |
| CDK19        | 161.8146364 | 0.689415085  | 0.175176095 | 1.26E-05    | 0.000124851 |
| LOC653653    | 163.8969273 | 0.688332384  | 0.17954544  | 1.94E-05    | 0.000184402 |
| LOC105374748 | 21.62318159 | -0.687183343 | 0.498132068 | 0.013707406 | 0.052597197 |
| STT3B        | 14250.40871 | -0.687011328 | 0.090965834 | 7.24E-15    | 2.90E-13    |
| IL22RA1      | 29.91045208 | 0.686459631  | 0.414213578 | 0.009340829 | 0.038522299 |
| UPF3AP1      | 132.5226845 | -0.686396434 | 0.199272284 | 8.61E-05    | 0.000695344 |
| LINC02328    | 149.5358381 | 0.685610159  | 0.202196357 | 0.000101955 | 0.000809888 |
| SERPINE2     | 3594.767138 | 0.685232143  | 0.07395607  | 3.40E-21    | 2.28E-19    |
| KLRF1        | 126.9862902 | 0.685095606  | 0.198116933 | 8.08E-05    | 0.000658136 |
| UPRT         | 122.1112552 | -0.683611942 | 0.231753548 | 0.000438599 | 0.002912276 |
| LINC01145    | 78.0064744  | 0.682977054  | 0.238139139 | 0.000575076 | 0.003689735 |

|              |             |              |             |             |             |
|--------------|-------------|--------------|-------------|-------------|-------------|
| RAB38        | 51.5515464  | -0.682221024 | 0.299558049 | 0.002859878 | 0.014514804 |
| LOC107987300 | 14.86193972 | -0.68190454  | 0.660786511 | 0.017605522 | 0.064073559 |
| BMPR2        | 696.8714099 | 0.681639903  | 0.143588359 | 3.29E-07    | 4.58E-06    |
| HIC2         | 248.84186   | -0.681357223 | 0.143715706 | 3.50E-07    | 4.83E-06    |
| IL10RA       | 618.8537986 | 0.680791033  | 0.11120821  | 1.59E-10    | 3.68E-09    |
| TTC3         | 3154.33035  | -0.680555633 | 0.075825905 | 5.00E-20    | 3.10E-18    |
| SQLE         | 8062.998332 | -0.680492661 | 0.064825851 | 1.64E-26    | 1.51E-24    |
| DUBR         | 31.14959349 | 0.679159488  | 0.422020624 | 0.010055583 | 0.041001725 |
| PPM1D        | 1291.627058 | -0.678127305 | 0.114923019 | 6.41E-10    | 1.38E-08    |
| LINC02693    | 346.5929075 | 0.678041501  | 0.13240047  | 5.13E-08    | 8.20E-07    |
| CNOT6L       | 861.2333782 | -0.677925486 | 0.142893167 | 3.44E-07    | 4.76E-06    |
| CCM2         | 1222.808123 | 0.677397991  | 0.095259428 | 2.00E-13    | 6.91E-12    |
| SLC27A2      | 310.2414433 | 0.675659815  | 0.130624978 | 3.86E-08    | 6.31E-07    |
| KIR3DX1      | 339.8229801 | 0.674911075  | 0.126328889 | 1.54E-08    | 2.65E-07    |
| LRRC23       | 110.8158632 | -0.674881053 | 0.205070358 | 0.000152813 | 0.00115255  |
| TMEM243      | 876.6622947 | -0.674330785 | 0.114549464 | 6.84E-10    | 1.47E-08    |
| UPF3A        | 871.9230542 | -0.674169723 | 0.092407796 | 5.36E-14    | 1.98E-12    |
| KCNH2        | 186.5193919 | -0.674101423 | 0.178726918 | 2.61E-05    | 0.00024075  |
| KRT18        | 87.69599706 | 0.673740978  | 0.243481633 | 0.000795713 | 0.004888372 |
| LOC105377673 | 21.73530803 | 0.673639791  | 0.622669732 | 0.017172667 | 0.062764685 |
| LOC124906285 | 32.40903389 | -0.672715013 | 0.405117235 | 0.009940003 | 0.0405778   |
| BTN3A3       | 624.1098513 | 0.671540171  | 0.101997773 | 7.99E-12    | 2.26E-10    |
| NAT8L        | 403.0445296 | -0.671362818 | 0.148879628 | 1.11E-06    | 1.38E-05    |
| GFM2         | 2559.329049 | -0.671092486 | 0.081091008 | 2.34E-17    | 1.17E-15    |
| LRRK1        | 136.5937805 | 0.66907635   | 0.191977986 | 7.74E-05    | 0.000634344 |
| LPAR4        | 22.48939735 | 0.668931628  | 0.531787157 | 0.015564933 | 0.057958848 |
| UBFD1        | 1989.254261 | -0.668856474 | 0.080470349 | 1.75E-17    | 8.74E-16    |
| CHMP7        | 2233.560495 | 0.668804842  | 0.086089628 | 1.41E-15    | 6.08E-14    |
| DENND1B      | 1521.612279 | 0.668776697  | 0.159020011 | 4.18E-06    | 4.57E-05    |
| IL6R         | 2390.277949 | -0.668448401 | 0.085505309 | 1.02E-15    | 4.49E-14    |
| SDF2L1       | 1917.124192 | -0.668061661 | 0.11758948  | 2.37E-09    | 4.73E-08    |
| TRPC4        | 287.7131754 | -0.667361866 | 0.144669163 | 6.64E-07    | 8.68E-06    |
| TTC30A       | 118.2355245 | 0.66681473   | 0.205023629 | 0.000172884 | 0.001286361 |
| PRG2         | 115.1799616 | -0.666740638 | 0.221274804 | 0.000389698 | 0.002624814 |
| BBX          | 566.5528833 | 0.666565026  | 0.140824864 | 3.69E-07    | 5.07E-06    |
| JAG1         | 697.9993977 | -0.666255552 | 0.113578502 | 7.83E-10    | 1.67E-08    |
| NECTIN2      | 118.2672025 | 0.666165238  | 0.226685326 | 0.000484203 | 0.003168915 |
| RPS15AP19    | 3197.167805 | -0.665999954 | 0.093427453 | 1.80E-13    | 6.25E-12    |
| DNAJC3       | 5324.27249  | -0.665995873 | 0.111182695 | 3.70E-10    | 8.22E-09    |
| FTO          | 813.8135348 | -0.665662808 | 0.103045893 | 1.85E-11    | 4.99E-10    |
| RUNX2        | 691.4679668 | 0.665524503  | 0.102767728 | 1.66E-11    | 4.49E-10    |
| LOC105369484 | 105.1359956 | 0.665015212  | 0.228977456 | 0.000542132 | 0.003495144 |
| NRARP        | 57.55873312 | 0.664908522  | 0.288591345 | 0.002773605 | 0.014143262 |
| STEAP1       | 117.4996968 | 0.664602559  | 0.200229636 | 0.00013891  | 0.00105923  |
| PCDHA11      | 40.4594716  | -0.664024778 | 0.352536235 | 0.006931105 | 0.030225624 |
| HLA-F        | 1081.727256 | 0.663934185  | 0.106840871 | 9.18E-11    | 2.20E-09    |
| MIR210HG     | 21.12668927 | 0.663899614  | 0.526477967 | 0.016045367 | 0.059409369 |
| SAYSD1       | 95.86225259 | 0.663880447  | 0.234248273 | 0.000672473 | 0.00421928  |
| LPP          | 87.80238281 | 0.663183248  | 0.26329639  | 0.001588093 | 0.008834244 |
| CLCN4        | 457.4357531 | 0.66284233   | 0.115036122 | 1.46E-09    | 3.00E-08    |

|              |             |              |             |             |             |
|--------------|-------------|--------------|-------------|-------------|-------------|
| ZFP36L2      | 1778.525499 | 0.662758876  | 0.093810595 | 2.85E-13    | 9.64E-12    |
| DNAJB9       | 2308.565143 | -0.66264028  | 0.146129295 | 9.68E-07    | 1.22E-05    |
| EHD1         | 5736.109622 | -0.661396839 | 0.095608061 | 8.94E-13    | 2.88E-11    |
| RPL29P33     | 1098.78346  | -0.661394792 | 0.090292658 | 4.35E-14    | 1.63E-12    |
| BRD3         | 284.1271493 | 0.660678884  | 0.14121301  | 4.88E-07    | 6.54E-06    |
| ZNF594       | 48.48978086 | 0.660484954  | 0.305910224 | 0.003885366 | 0.01865859  |
| ESAM         | 33.18039882 | 0.660396618  | 0.390298868 | 0.009477321 | 0.039029434 |
| RASSF5       | 630.697432  | 0.660365917  | 0.102288171 | 1.91E-11    | 5.14E-10    |
| CHROMR       | 276.6524871 | 0.659687952  | 0.137438147 | 2.72E-07    | 3.85E-06    |
| KCNK6        | 387.5738919 | -0.659437819 | 0.15622091  | 4.17E-06    | 4.57E-05    |
| STAC         | 41.92577568 | -0.658908417 | 0.345511096 | 0.006656534 | 0.029234391 |
| LOC105379444 | 24.76714639 | -0.658759197 | 0.480116037 | 0.01479785  | 0.055719583 |
| CIITA        | 315.8270466 | 0.658717512  | 0.146584278 | 1.19E-06    | 1.47E-05    |
| ARID3A       | 930.3675933 | -0.658287574 | 0.101547536 | 1.64E-11    | 4.48E-10    |
| NEIL2        | 236.9574847 | -0.658257242 | 0.153533338 | 3.17E-06    | 3.56E-05    |
| TYRO3        | 303.5428939 | -0.65734629  | 0.131642254 | 1.06E-07    | 1.61E-06    |
| ANLN         | 668.7838096 | 0.65677174   | 0.11762294  | 4.11E-09    | 7.86E-08    |
| SORBS1       | 67.67488899 | -0.656771275 | 0.277596485 | 0.002432364 | 0.012675668 |
| RRM2B        | 1099.899837 | -0.656547882 | 0.133536531 | 1.53E-07    | 2.25E-06    |
| CENPV        | 619.1484396 | -0.656508504 | 0.121538433 | 1.23E-08    | 2.15E-07    |
| DPH3         | 1028.20128  | -0.656279759 | 0.105029584 | 7.48E-11    | 1.82E-09    |
| CAMK4        | 223.9501814 | 0.656161793  | 0.176983267 | 3.41E-05    | 0.000305572 |
| PIK3AP1      | 657.6440329 | 0.656144456  | 0.106457093 | 1.28E-10    | 3.00E-09    |
| MAGED2       | 4306.263842 | -0.656096563 | 0.067806826 | 7.35E-23    | 5.61E-21    |
| TROAP        | 977.5058703 | 0.656024017  | 0.106849982 | 1.51E-10    | 3.51E-09    |
| FUT11        | 138.0289071 | 0.655952602  | 0.18920559  | 8.53E-05    | 0.000690229 |
| ARRB1        | 31.598346   | -0.655913634 | 0.405999915 | 0.010877886 | 0.043594621 |
| TMEM203      | 773.8390795 | 0.65576237   | 0.11571826  | 2.63E-09    | 5.18E-08    |
| VWA5A        | 105.4619147 | 0.654945832  | 0.216704682 | 0.000381422 | 0.002576085 |
| ZBTB18       | 125.2683364 | 0.654819424  | 0.199834967 | 0.000164549 | 0.001229824 |
| IGHV3-30     | 366.2075688 | -0.653742027 | 0.146508006 | 1.45E-06    | 1.76E-05    |
| DNAAF4-CCPG1 | 2512.108399 | 0.65293581   | 0.089438834 | 5.26E-14    | 1.95E-12    |
| ZHX2         | 447.4850175 | -0.652849682 | 0.136496411 | 3.08E-07    | 4.31E-06    |
| OVOL2        | 13.36376992 | 0.652194527  | 0.75435684  | 0.019401338 | 0.069189048 |
| RNFT2        | 143.0753109 | 0.65134334   | 0.216810919 | 0.0004105   | 0.002749395 |
| FADS2        | 605.0715748 | -0.651186947 | 0.11088345  | 8.09E-10    | 1.72E-08    |
| ZNF814       | 38.86893076 | 0.650792014  | 0.358273463 | 0.007899827 | 0.033558529 |
| TMEM184B     | 1514.9338   | -0.650658089 | 0.099568864 | 1.19E-11    | 3.32E-10    |
| MARVELD1     | 245.1937182 | -0.650537477 | 0.15458172  | 4.54E-06    | 4.94E-05    |
| TMEM132A     | 218.0191386 | -0.649985873 | 0.173585051 | 3.09E-05    | 0.000280145 |
| FABP5P2      | 274.0337448 | -0.649674763 | 0.147683833 | 1.88E-06    | 2.23E-05    |
| SLC16A13     | 130.8414426 | 0.649211984  | 0.192157816 | 0.00011783  | 0.000916653 |
| B4GALT1      | 2431.57335  | -0.649185774 | 0.086792549 | 1.43E-14    | 5.55E-13    |
| SLC9A3-AS1   | 41.43419392 | -0.648831238 | 0.420104839 | 0.012412586 | 0.04841188  |
| SCARNA12     | 39.44254781 | 0.648664538  | 0.559920389 | 0.017216108 | 0.06287038  |
| OSTCP2       | 26.42115654 | -0.648086209 | 0.443254664 | 0.013777206 | 0.052792549 |
| AMDHD1       | 26.24854251 | -0.647957099 | 0.452958168 | 0.014212642 | 0.054009998 |
| STAT2        | 906.2631058 | 0.647252867  | 0.089230133 | 7.60E-14    | 2.73E-12    |
| CDCA7        | 1248.312144 | -0.647237837 | 0.097727837 | 6.53E-12    | 1.87E-10    |
| GTSE1        | 881.2654138 | 0.647172173  | 0.095152141 | 1.94E-12    | 5.98E-11    |

|               |             |              |             |             |             |
|---------------|-------------|--------------|-------------|-------------|-------------|
| ZKSCAN2       | 118.1907121 | -0.647142512 | 0.204750463 | 0.000255284 | 0.001811786 |
| LOC105369618  | 54.2873092  | -0.647038297 | 0.302939665 | 0.004255456 | 0.020133008 |
| RBM47         | 878.4119089 | 0.645803765  | 0.104474936 | 1.17E-10    | 2.77E-09    |
| CTDSP1        | 2087.320149 | 0.6451289    | 0.104445684 | 1.21E-10    | 2.86E-09    |
| CTTN          | 148.4607515 | -0.644792294 | 0.177178168 | 4.67E-05    | 0.000404705 |
| SOGA1         | 199.0681994 | 0.644724356  | 0.166040045 | 1.75E-05    | 0.00016835  |
| ARHGDIB       | 6088.234581 | 0.644343128  | 0.063854514 | 1.19E-24    | 1.00E-22    |
| RBIS          | 1913.246954 | -0.6441057   | 0.084985915 | 6.68E-15    | 2.68E-13    |
| SLC27A3       | 69.55057917 | 0.643993812  | 0.304013409 | 0.004442891 | 0.020872908 |
| LDLR          | 3489.13975  | -0.643768017 | 0.082914098 | 1.60E-15    | 6.84E-14    |
| RUFY3         | 751.2413758 | -0.643624966 | 0.101675503 | 4.56E-11    | 1.14E-09    |
| MBNL2         | 690.6902641 | -0.643406587 | 0.134170737 | 2.93E-07    | 4.12E-06    |
| JRK           | 289.8502916 | 0.64263426   | 0.139768541 | 7.70E-07    | 9.93E-06    |
| STK17B        | 4507.361885 | 0.64209575   | 0.134532039 | 3.25E-07    | 4.51E-06    |
| NINJ2         | 79.76718843 | -0.641759114 | 0.256699429 | 0.001835556 | 0.009986277 |
| ZIC2          | 106.2743066 | -0.641164134 | 0.230514538 | 0.000833313 | 0.005084734 |
| SLC1A4        | 4690.569736 | 0.640693286  | 0.074834465 | 2.16E-18    | 1.15E-16    |
| SCART1        | 42.29085349 | 0.64066214   | 0.357330486 | 0.008622408 | 0.036022735 |
| MAGED1        | 6036.985272 | -0.640575558 | 0.070150592 | 1.34E-20    | 8.77E-19    |
| FABP5         | 1826.22715  | -0.640104134 | 0.082621762 | 1.70E-15    | 7.25E-14    |
| IRAK4         | 780.4102007 | 0.639727087  | 0.100154722 | 3.18E-11    | 8.24E-10    |
| ARRDC3        | 2254.745039 | -0.63930827  | 0.146295311 | 2.22E-06    | 2.58E-05    |
| PNP           | 4064.265157 | -0.639148937 | 0.074203105 | 1.41E-18    | 7.64E-17    |
| RAPGEF2       | 973.3863998 | -0.639135154 | 0.114704791 | 4.73E-09    | 8.93E-08    |
| LINC01055     | 30.29652253 | -0.639113512 | 0.476810052 | 0.016530899 | 0.060726683 |
| PIK3R3        | 168.8266448 | -0.638879483 | 0.167443397 | 2.37E-05    | 0.000221164 |
| PLEKHG4       | 605.5575039 | -0.638520964 | 0.114484995 | 4.70E-09    | 8.90E-08    |
| TMEM250       | 740.3115583 | 0.638362756  | 0.11595942  | 6.93E-09    | 1.27E-07    |
| CHRM4         | 11.37296557 | 0.638290021  | 0.864029773 | 0.019058884 | 0.068176554 |
| CGAS          | 248.4428091 | 0.638085779  | 0.141967163 | 1.25E-06    | 1.54E-05    |
| LRRC34        | 50.29123971 | -0.6379701   | 0.338143308 | 0.007422831 | 0.031959514 |
| CFH           | 12.36737858 | 0.637831259  | 0.764415653 | 0.02010117  | 0.071199009 |
| HSP90B2P      | 72.79112609 | -0.63780469  | 0.264999146 | 0.002364732 | 0.012374325 |
| TNFRSF17      | 6267.594282 | -0.637393157 | 0.077383986 | 3.52E-17    | 1.71E-15    |
| PIP5KL1       | 15.89536091 | 0.637053814  | 0.605868213 | 0.019944656 | 0.070745927 |
| CCPG1         | 3323.300641 | 0.637047454  | 0.107315586 | 5.46E-10    | 1.19E-08    |
| SLC25A30      | 466.4865133 | 0.637029923  | 0.144316785 | 1.80E-06    | 2.15E-05    |
| ABLIM1        | 919.3570799 | 0.636529131  | 0.091508294 | 6.98E-13    | 2.28E-11    |
| ZNF670-ZNF695 | 64.40576068 | 0.63564284   | 0.26737712  | 0.002535004 | 0.013104079 |
| LOC606724     | 1065.516694 | 0.635522263  | 0.130562424 | 2.14E-07    | 3.06E-06    |
| KCNMB4        | 387.7600267 | 0.635319345  | 0.117876752 | 1.33E-08    | 2.30E-07    |
| RNF170        | 519.8236347 | -0.634847414 | 0.123010779 | 4.63E-08    | 7.44E-07    |
| BTG2          | 5803.060969 | -0.634089947 | 0.075939341 | 1.34E-17    | 6.78E-16    |
| ZNF532        | 49.00320226 | 0.63398742   | 0.334380904 | 0.007158772 | 0.031062002 |
| H3-5          | 1097.119654 | -0.632811433 | 0.089946865 | 3.99E-13    | 1.33E-11    |
| MPZL2         | 164.6565037 | 0.632560302  | 0.206642026 | 0.000354817 | 0.002412391 |
| PANX2         | 47.05111844 | 0.631858856  | 0.35117344  | 0.008610708 | 0.035982535 |
| NT5E          | 259.0858404 | 0.631720202  | 0.137000924 | 7.39E-07    | 9.58E-06    |
| LILRP1        | 10.46842495 | 0.631699138  | 1.02071162  | 0.017481631 | 0.063732507 |
| TMEM50B       | 1215.515829 | -0.631616105 | 0.097968126 | 2.20E-11    | 5.82E-10    |

|              |             |              |             |             |             |
|--------------|-------------|--------------|-------------|-------------|-------------|
| ZNF773       | 62.16780611 | 0.631555264  | 0.281489396 | 0.003474834 | 0.017051202 |
| EIF3H        | 11424.02529 | -0.631395198 | 0.064449055 | 2.33E-23    | 1.83E-21    |
| ACSM3        | 96.49514219 | -0.630470164 | 0.23621697  | 0.001215066 | 0.007010095 |
| NOMO3        | 3763.905226 | -0.629797596 | 0.072366699 | 6.60E-19    | 3.66E-17    |
| PFKFB3       | 888.1010243 | 0.629169091  | 0.091720233 | 1.35E-12    | 4.25E-11    |
| MPHOSPH9     | 619.4592503 | 0.628444517  | 0.118053413 | 1.92E-08    | 3.26E-07    |
| CHST11       | 1219.707205 | 0.628198357  | 0.096602665 | 1.54E-11    | 4.21E-10    |
| IGHV3-33     | 401.9633727 | -0.627757342 | 0.139469927 | 1.30E-06    | 1.59E-05    |
| CENPA        | 920.7560027 | 0.627684945  | 0.101677954 | 1.30E-10    | 3.03E-09    |
| ZNF695       | 127.2227739 | 0.627527659  | 0.190975609 | 0.000173801 | 0.001292273 |
| RAET1K       | 5.797688895 | 0.627385961  | 3.420564635 | 0.01073742  | 0.043193519 |
| LRRC8C       | 975.0628175 | 0.626965064  | 0.121236974 | 4.42E-08    | 7.15E-07    |
| LINC01611    | 37.86388715 | 0.626066226  | 0.394976979 | 0.012487644 | 0.048660784 |
| SKA1         | 1412.277161 | 0.625706585  | 0.096069569 | 1.45E-11    | 3.99E-10    |
| GOLGA4       | 314.4675128 | -0.625631939 | 0.150551513 | 5.86E-06    | 6.22E-05    |
| NOMO1        | 5466.590621 | -0.625532775 | 0.067072924 | 2.25E-21    | 1.54E-19    |
| SPIB         | 4787.063148 | 0.625260793  | 0.091827573 | 1.85E-12    | 5.74E-11    |
| H2BC12L      | 123.7318378 | -0.624663555 | 0.216352465 | 0.000626883 | 0.003975006 |
| LOC102724334 | 123.7318378 | -0.624663555 | 0.216352465 | 0.000626883 | 0.003975006 |
| NOMO2        | 4748.746331 | -0.62450458  | 0.067188728 | 3.21E-21    | 2.16E-19    |
| LINC02267    | 22.45911132 | -0.624485696 | 0.506461375 | 0.018675348 | 0.067067815 |
| MICAL2       | 182.345634  | -0.624476608 | 0.190945188 | 0.000182445 | 0.001349018 |
| TMEM231      | 333.2945244 | -0.623867473 | 0.136559476 | 9.57E-07    | 1.21E-05    |
| IFTAP        | 263.7379505 | -0.623686309 | 0.145509508 | 3.42E-06    | 3.81E-05    |
| ZDHHC14      | 320.6425989 | 0.623424141  | 0.143820827 | 2.73E-06    | 3.11E-05    |
| HTATSF1P2    | 33.20417684 | 0.622842286  | 0.378462581 | 0.011563965 | 0.045761695 |
| ELF3-AS1     | 23.32715855 | -0.622280355 | 0.519501173 | 0.019448512 | 0.069298329 |
| STAG3L5P     | 40.64814352 | -0.622217284 | 0.365130178 | 0.010732294 | 0.043191061 |
| LINC02864    | 328.2010829 | 0.622168937  | 0.133738955 | 6.24E-07    | 8.20E-06    |
| GREB1        | 156.523535  | -0.622104585 | 0.191955681 | 0.000203895 | 0.001485424 |
| SLC19A2      | 802.0442517 | -0.622103449 | 0.157202372 | 1.39E-05    | 0.000135949 |
| NTHL1        | 674.0296296 | -0.621947789 | 0.11151407  | 4.95E-09    | 9.27E-08    |
| RASA4CP      | 75.72632998 | -0.621842988 | 0.245469252 | 0.001772655 | 0.009694115 |
| TRIM59       | 375.0492006 | 0.621828661  | 0.164069657 | 2.70E-05    | 0.000248537 |
| CIT          | 293.2479165 | 0.621635482  | 0.147867932 | 4.81E-06    | 5.20E-05    |
| IGF2BP3      | 863.2582772 | -0.621328474 | 0.109034027 | 2.34E-09    | 4.68E-08    |
| LUC7L        | 406.0395277 | -0.620870887 | 0.118190916 | 2.91E-08    | 4.83E-07    |
| BRD3OS       | 346.297397  | 0.620774237  | 0.146367995 | 4.16E-06    | 4.56E-05    |
| ZNFX1        | 982.488868  | 0.620587873  | 0.097066806 | 3.21E-11    | 8.29E-10    |
| PIGY         | 958.1668947 | -0.620526402 | 0.095465607 | 1.66E-11    | 4.49E-10    |
| PYURF        | 958.1668947 | -0.620526402 | 0.095465607 | 1.66E-11    | 4.49E-10    |
| LOC105372903 | 36.51482233 | -0.620277513 | 0.368451828 | 0.011103777 | 0.044356194 |
| HDAC7        | 1446.65401  | 0.620254265  | 0.09958276  | 9.37E-11    | 2.24E-09    |
| KLF13        | 5193.43779  | 0.620206517  | 0.085026262 | 6.05E-14    | 2.21E-12    |
| IFI16        | 2161.785973 | 0.620176163  | 0.095166134 | 1.42E-11    | 3.91E-10    |
| NPL          | 61.41351583 | 0.619732094  | 0.288532742 | 0.00448224  | 0.021029248 |
| CDC25C       | 323.965925  | 0.61914164   | 0.125142199 | 1.45E-07    | 2.15E-06    |
| CEP55        | 1362.874997 | 0.61891591   | 0.105249264 | 7.99E-10    | 1.70E-08    |
| IPO5         | 12052.63991 | -0.618683536 | 0.063463148 | 4.22E-23    | 3.31E-21    |
| CDKN2C       | 1407.352834 | 0.61790821   | 0.086294662 | 1.61E-13    | 5.62E-12    |



|                 |             |              |             |             |             |
|-----------------|-------------|--------------|-------------|-------------|-------------|
| KIAA0895L       | 231.7227934 | -0.617824133 | 0.166530068 | 3.83E-05    | 0.000338896 |
| MANBA           | 429.0677132 | -0.617753262 | 0.113776445 | 1.13E-08    | 2.00E-07    |
| ZNF586          | 310.1676771 | 0.617633065  | 0.139679331 | 1.83E-06    | 2.19E-05    |
| KLHL15          | 600.3362506 | -0.617615485 | 0.145552424 | 4.12E-06    | 4.52E-05    |
| CDC20P1         | 19.55819092 | 0.61743418   | 0.536346877 | 0.020332375 | 0.07184473  |
| LINC02210-CRHR1 | 39.50337027 | 0.61725489   | 0.343840364 | 0.009237566 | 0.038132762 |
| RIDA            | 495.0760493 | -0.617070538 | 0.156068741 | 1.42E-05    | 0.000138661 |
| IGHJ3P          | 150.18929   | -0.616918337 | 0.196004999 | 0.000289356 | 0.002018847 |
| TRAP1           | 6989.58976  | -0.616559623 | 0.071650599 | 1.60E-18    | 8.60E-17    |
| SOCS2           | 409.1236765 | -0.616073857 | 0.123831599 | 1.28E-07    | 1.92E-06    |
| UQCRBP1         | 591.0302906 | -0.615829859 | 0.158582648 | 1.97E-05    | 0.000186681 |
| CENPT           | 369.6827836 | -0.615602865 | 0.126191904 | 2.14E-07    | 3.07E-06    |
| MTMR10          | 1032.736435 | 0.615593755  | 0.095094933 | 1.93E-11    | 5.18E-10    |
| CECR7           | 17.24537199 | 0.615375202  | 0.580458299 | 0.021205936 | 0.074457256 |
| VSIG10          | 21.43151224 | 0.6152825    | 0.579943139 | 0.020923375 | 0.073614401 |
| TGFBR2          | 287.7211423 | 0.614885355  | 0.141996874 | 2.82E-06    | 3.20E-05    |
| CDKN2A          | 1405.458531 | 0.614854916  | 0.129395348 | 3.89E-07    | 5.31E-06    |
| ATXN1           | 1163.278936 | 0.614395507  | 0.110277843 | 5.01E-09    | 9.35E-08    |
| EPB41L5         | 69.90612289 | 0.614221208  | 0.271215939 | 0.003483755 | 0.017080462 |
| LOC124904996    | 90.08756024 | -0.614133355 | 0.227320108 | 0.001148097 | 0.006691885 |
| CARD10          | 38.28877453 | 0.614130237  | 0.368121971 | 0.011524313 | 0.045677849 |
| C11orf1         | 5518.218844 | -0.6138466   | 0.066570668 | 6.41E-21    | 4.23E-19    |
| TRAF2           | 723.2296709 | 0.613821753  | 0.11851811  | 4.39E-08    | 7.12E-07    |
| ALPK2           | 305.8299734 | 0.613548118  | 0.147202144 | 5.73E-06    | 6.10E-05    |
| C8orf44         | 18.05531418 | -0.612839303 | 0.755632109 | 0.021632567 | 0.075679023 |
| STK38           | 1028.674696 | 0.612380887  | 0.089101964 | 1.29E-12    | 4.07E-11    |
| GOLGA1          | 197.5721516 | 0.611921148  | 0.191120978 | 0.000237291 | 0.001702221 |
| TMPO-AS1        | 90.17060202 | 0.611891344  | 0.230422968 | 0.001298667 | 0.00740257  |
| LOC102723728    | 1175.60895  | -0.611814816 | 0.083139198 | 3.87E-14    | 1.45E-12    |
| CCDC69          | 5409.070865 | 0.610610309  | 0.073120841 | 1.41E-17    | 7.08E-16    |
| TMEM63A         | 407.5474737 | 0.610355723  | 0.131819255 | 7.14E-07    | 9.28E-06    |
| POGZ            | 1796.432949 | -0.609794692 | 0.08009404  | 5.58E-15    | 2.26E-13    |
| IMPDH2          | 7715.568447 | -0.609697747 | 0.068267858 | 9.39E-20    | 5.71E-18    |
| ST6GAL1         | 3535.099867 | 0.609697419  | 0.069474812 | 3.53E-19    | 2.02E-17    |
| IFT20           | 341.1708324 | -0.609194752 | 0.139044283 | 2.35E-06    | 2.73E-05    |
| DCBLD2          | 175.2048284 | -0.60900767  | 0.191387118 | 0.000261874 | 0.001847202 |
| FAM43A          | 82.0097253  | 0.60863525   | 0.28937406  | 0.005168946 | 0.02373658  |
| RPS19           | 53083.81081 | -0.608501431 | 0.107362725 | 1.70E-09    | 3.45E-08    |
| KIF23           | 1134.485311 | 0.608477676  | 0.099781333 | 2.16E-10    | 4.90E-09    |
| SLC5A6          | 2633.947966 | -0.607586547 | 0.098983392 | 1.75E-10    | 4.03E-09    |
| LGALS1          | 725.2665921 | -0.607515851 | 0.106925067 | 2.76E-09    | 5.43E-08    |
| IL2RB           | 1127.437856 | -0.607486787 | 0.114574166 | 2.37E-08    | 3.99E-07    |
| RREB1           | 265.5203657 | 0.607206464  | 0.147784621 | 7.63E-06    | 7.88E-05    |
| GLDC            | 6711.627975 | -0.607132684 | 0.069380242 | 4.55E-19    | 2.57E-17    |
| UGDH            | 1534.047654 | -0.60672253  | 0.09621741  | 5.88E-11    | 1.45E-09    |
| ARHGAP9         | 111.7189513 | -0.606708905 | 0.238644807 | 0.001808399 | 0.009857113 |
| JUNB            | 1832.771373 | -0.6067003   | 0.107658665 | 3.81E-09    | 7.31E-08    |
| DSCR4           | 66.21315538 | -0.606113655 | 0.267439494 | 0.0036542   | 0.01774531  |
| KIF18A          | 477.8250108 | 0.605662628  | 0.127950381 | 4.34E-07    | 5.86E-06    |
| SLC6A9          | 649.8707195 | 0.605333985  | 0.135466356 | 1.56E-06    | 1.88E-05    |

|                |             |              |             |             |             |
|----------------|-------------|--------------|-------------|-------------|-------------|
| SLC31A1        | 2010.185376 | -0.60525184  | 0.079323879 | 5.11E-15    | 2.08E-13    |
| SH3BP1         | 1184.29829  | 0.604980551  | 0.108509725 | 5.04E-09    | 9.39E-08    |
| SEC11C         | 7014.392911 | -0.604904372 | 0.070770478 | 2.73E-18    | 1.44E-16    |
| HRK            | 167.6106098 | 0.604887626  | 0.18305049  | 0.000172527 | 0.001285459 |
| LOC124906065   | 46.59599084 | -0.604843613 | 0.315868052 | 0.007844487 | 0.033417707 |
| AP1S2          | 1833.296794 | 0.604772918  | 0.274403833 | 0.004090241 | 0.01946433  |
| TSPAN33        | 581.5505065 | 0.604712509  | 0.128121415 | 4.72E-07    | 6.34E-06    |
| LSP1           | 7486.696482 | 0.604694096  | 0.074982909 | 7.13E-17    | 3.41E-15    |
| NBR2           | 36.96021278 | 0.604506421  | 0.390795695 | 0.014187908 | 0.053962661 |
| RPS6KA4        | 412.0600437 | 0.604105019  | 0.133887988 | 1.27E-06    | 1.56E-05    |
| VANGL1         | 321.6191121 | 0.603529244  | 0.127940043 | 4.77E-07    | 6.40E-06    |
| LOC124907737   | 15.22375124 | -0.603409618 | 0.623493717 | 0.022988391 | 0.079379854 |
| FRMD6          | 1396.130487 | 0.603347871  | 0.09034067  | 5.07E-12    | 1.48E-10    |
| ZFP36          | 1556.071319 | -0.603307467 | 0.103376932 | 1.15E-09    | 2.39E-08    |
| CEP85L         | 181.6041708 | -0.603225248 | 0.173524771 | 9.52E-05    | 0.000762001 |
| ASPM           | 1406.314637 | 0.603072464  | 0.115383052 | 3.44E-08    | 5.65E-07    |
| HDAC6          | 439.5741465 | 0.602821754  | 0.121322264 | 1.37E-07    | 2.04E-06    |
| ZNF671         | 108.305026  | 0.602596309  | 0.206973981 | 0.000632911 | 0.004010292 |
| SLC7A5         | 19816.08882 | -0.6025881   | 0.08828982  | 1.86E-12    | 5.76E-11    |
| CPNE7          | 191.4549718 | -0.601981425 | 0.167051596 | 6.10E-05    | 0.000514245 |
| ZDHHC12        | 1413.25597  | 0.601972323  | 0.134934344 | 1.62E-06    | 1.95E-05    |
| PLPPR2         | 278.7267872 | -0.601895115 | 0.139162508 | 3.08E-06    | 3.47E-05    |
| P3R3URF-PIK3R3 | 143.6641538 | -0.601729177 | 0.181665855 | 0.000172587 | 0.001285459 |
| CMTM3          | 265.152471  | 0.601618035  | 0.16011803  | 3.33E-05    | 0.00029999  |
| ATP8A1         | 1500.794163 | 0.601499452  | 0.125567401 | 3.33E-07    | 4.62E-06    |
| GABARAPL2      | 1937.961548 | -0.601346015 | 0.079522392 | 8.63E-15    | 3.42E-13    |
| N4BP3          | 521.8308196 | 0.601252452  | 0.123858521 | 2.46E-07    | 3.49E-06    |
| FZD7           | 267.6070184 | 0.600927545  | 0.158606031 | 2.95E-05    | 0.000268777 |
| SSNA1          | 1465.625713 | 0.600797056  | 0.110469546 | 1.10E-08    | 1.95E-07    |
| ALG1           | 910.3490292 | -0.600718213 | 0.124279079 | 2.79E-07    | 3.94E-06    |
| RAB27A         | 1489.089402 | 0.600680148  | 0.122732549 | 1.98E-07    | 2.86E-06    |
| FERMT1         | 221.7464096 | -0.600236269 | 0.160231118 | 3.56E-05    | 0.000318152 |
| KCNH5          | 49.66014076 | -0.600074216 | 0.325613051 | 0.009013348 | 0.037358581 |
| NDC80          | 1534.142438 | 0.599917206  | 0.088216621 | 2.20E-12    | 6.69E-11    |
| H2BC15         | 16.88397476 | 0.599617526  | 1.242481669 | 0.01441958  | 0.054651753 |
| TRNV           | 58.62170058 | 0.598689156  | 0.287699869 | 0.005545958 | 0.025128038 |
| SFXN5          | 172.8581948 | 0.598551677  | 0.171504164 | 9.08E-05    | 0.000729685 |
| LOC105369767   | 38.4719179  | 0.598322617  | 0.353980354 | 0.011610559 | 0.045883172 |
| RASA3          | 5737.78733  | -0.59798951  | 0.067230897 | 1.29E-19    | 7.74E-18    |
| RPL7           | 37941.64882 | -0.597963107 | 0.068775998 | 1.00E-18    | 5.46E-17    |
| ETV3           | 1418.544795 | -0.597943348 | 0.097654995 | 1.95E-10    | 4.45E-09    |
| MYADM          | 2168.887901 | 0.597406928  | 0.101422152 | 8.10E-10    | 1.72E-08    |
| KIFC3          | 13.92532866 | -0.597164784 | 0.675804049 | 0.023410371 | 0.080515867 |
| FCHO1          | 294.1248755 | 0.597157867  | 0.143701339 | 6.38E-06    | 6.69E-05    |
| PRRT3          | 172.9156159 | -0.596552199 | 0.184550308 | 0.000233289 | 0.001676991 |
| UAP1           | 9899.497337 | -0.59633634  | 0.064583688 | 6.20E-21    | 4.11E-19    |
| FABP5P7        | 1227.372696 | -0.596280691 | 0.093337267 | 3.56E-11    | 9.11E-10    |
| CALU           | 11819.49905 | -0.59603515  | 0.075570105 | 6.98E-16    | 3.16E-14    |
| CTDSP2         | 8362.940958 | 0.595949123  | 0.082480219 | 1.08E-13    | 3.84E-12    |
| MEGF9          | 508.2800856 | 0.595652377  | 0.115269981 | 4.85E-08    | 7.79E-07    |

|              |             |              |             |             |             |
|--------------|-------------|--------------|-------------|-------------|-------------|
| PROB1        | 195.8437303 | -0.595547885 | 0.158425132 | 3.34E-05    | 0.000300499 |
| ZNF45        | 249.5812832 | 0.595534881  | 0.148354477 | 1.18E-05    | 0.000117772 |
| SPRED1       | 285.7952003 | 0.595116799  | 0.232007191 | 0.001724724 | 0.009481602 |
| P2RX1        | 709.0316524 | -0.5948032   | 0.135714155 | 2.46E-06    | 2.83E-05    |
| CNN2         | 3353.924233 | 0.594551334  | 0.075598946 | 8.07E-16    | 3.61E-14    |
| LINC00674    | 396.8267955 | 0.593929079  | 0.117505998 | 8.95E-08    | 1.37E-06    |
| ZNF875       | 189.0497234 | 0.593876367  | 0.157852372 | 3.31E-05    | 0.000298255 |
| LRRC14B      | 2591.050494 | -0.593734933 | 0.094864078 | 8.60E-11    | 2.07E-09    |
| ZSCAN30      | 128.3055647 | -0.592879653 | 0.20713248  | 0.000758607 | 0.004696748 |
| SEC13        | 3909.481839 | -0.592426962 | 0.076555146 | 2.28E-15    | 9.60E-14    |
| ZNF718       | 165.171746  | 0.59210907   | 0.208283433 | 0.000794537 | 0.004887745 |
| ITM2B        | 7588.00706  | 0.591953867  | 0.080314831 | 3.70E-14    | 1.39E-12    |
| CRELD1       | 256.7297659 | -0.591807349 | 0.153600125 | 2.39E-05    | 0.000223197 |
| ZNF320       | 293.4369442 | 0.591739955  | 0.166464007 | 7.25E-05    | 0.000599108 |
| MEIS1        | 93.73243186 | 0.591076159  | 0.242776985 | 0.002468684 | 0.012830194 |
| MZB1         | 16988.37014 | -0.590818151 | 0.077896808 | 7.46E-15    | 2.96E-13    |
| BMP6         | 695.9828256 | 0.590159202  | 0.106540989 | 6.47E-09    | 1.19E-07    |
| RPS6KA5      | 237.8746427 | 0.590045797  | 0.165469362 | 7.09E-05    | 0.000587179 |
| PIK3C2A      | 1277.090507 | 0.589942632  | 0.119756593 | 1.74E-07    | 2.53E-06    |
| ZNF83        | 185.5927609 | 0.58984662   | 0.164616022 | 6.63E-05    | 0.000554225 |
| FDXACB1      | 2474.725752 | 0.589675068  | 0.073201811 | 1.74E-16    | 8.13E-15    |
| LPIN3        | 139.0714    | -0.589118498 | 0.181979836 | 0.000234316 | 0.00168367  |
| NDFIP2       | 1457.5169   | -0.589109203 | 0.138324631 | 4.27E-06    | 4.67E-05    |
| HLA-DMA      | 1524.801809 | -0.588565575 | 0.09702215  | 2.92E-10    | 6.55E-09    |
| MX2          | 14.39642667 | 0.58828463   | 0.648618295 | 0.023516851 | 0.080849973 |
| LERFS        | 76.71217103 | 0.587951991  | 0.265306837 | 0.004311297 | 0.020337436 |
| SLC39A8      | 4030.180627 | -0.587836719 | 0.092469096 | 4.53E-11    | 1.14E-09    |
| ZNF816       | 198.4812272 | 0.587817181  | 0.160233524 | 4.82E-05    | 0.000415314 |
| ESPNL        | 22.55155725 | -0.587783877 | 0.501027367 | 0.022564763 | 0.078370237 |
| SP4          | 618.5251884 | 0.587708194  | 0.167079877 | 8.35E-05    | 0.000677786 |
| LOC124900954 | 408.8294932 | 0.587680843  | 0.118721689 | 1.57E-07    | 2.31E-06    |
| PPP1R18      | 732.4404416 | 0.587496195  | 0.102766312 | 2.34E-09    | 4.68E-08    |
| DDAH2        | 272.2816518 | 0.587210073  | 0.144562688 | 1.00E-05    | 0.00010099  |
| DHRS1        | 200.7897167 | -0.586976846 | 0.154826692 | 3.02E-05    | 0.000274538 |
| DDR1         | 52.50127481 | 0.586766892  | 0.315700831 | 0.009017299 | 0.037365498 |
| PELI1        | 3176.584135 | -0.58633019  | 0.106330905 | 7.62E-09    | 1.38E-07    |
| BMERB1       | 55.38191436 | -0.586248128 | 0.294264743 | 0.007075402 | 0.030738768 |
| YPEL5        | 1720.231986 | -0.586204583 | 0.101388275 | 1.67E-09    | 3.38E-08    |
| TMEM154      | 349.8676748 | 0.586166145  | 0.13962911  | 5.48E-06    | 5.85E-05    |
| CD68         | 42.81631672 | -0.585558882 | 0.33275363  | 0.011121917 | 0.044397934 |
| TANC2        | 178.3021502 | -0.585524471 | 0.168759185 | 0.000104301 | 0.000825873 |
| CDC20        | 2328.652119 | 0.585297207  | 0.082360543 | 2.64E-13    | 8.98E-12    |
| PNPLA2       | 714.6467113 | 0.585140482  | 0.131808921 | 1.89E-06    | 2.24E-05    |
| PADI2        | 22.64192038 | 0.584174985  | 0.517316216 | 0.02269298  | 0.07867354  |
| PREB         | 3875.955511 | -0.582990457 | 0.080624595 | 1.10E-13    | 3.92E-12    |
| CYP51A1      | 13257.18068 | -0.582806968 | 0.081691918 | 2.34E-13    | 8.04E-12    |
| NME2P1       | 103.209747  | 0.582339804  | 0.248036138 | 0.003195378 | 0.015941907 |
| ZNF611       | 147.8970172 | 0.58211637   | 0.213423755 | 0.001140812 | 0.006658389 |
| S100A6       | 7695.082105 | -0.581699225 | 0.079811583 | 7.13E-14    | 2.58E-12    |
| RRAD         | 9.925369887 | -0.58168079  | 1.09249033  | 0.018034471 | 0.065321677 |

|              |             |              |             |             |             |
|--------------|-------------|--------------|-------------|-------------|-------------|
| MFSD12       | 605.3016902 | -0.581275382 | 0.125345622 | 7.76E-07    | 9.99E-06    |
| GPR137       | 351.8093685 | 0.581160019  | 0.146599592 | 1.54E-05    | 0.000149456 |
| TOX2         | 358.9196974 | 0.580821895  | 0.147436885 | 1.68E-05    | 0.00016262  |
| CTSB         | 3698.763941 | -0.580244692 | 0.079131496 | 5.13E-14    | 1.91E-12    |
| GFI1B        | 29.91233332 | 0.580119348  | 0.427498348 | 0.019322224 | 0.068998897 |
| ARHGEF2      | 5474.746308 | 0.579968337  | 0.085076227 | 2.07E-12    | 6.33E-11    |
| PHGDH        | 2067.690166 | 0.579381386  | 0.089444565 | 2.10E-11    | 5.57E-10    |
| TRAM2        | 4478.856892 | 0.579354125  | 0.080770332 | 1.72E-13    | 5.99E-12    |
| PLEKHG2      | 1755.98317  | -0.579253491 | 0.101483052 | 2.70E-09    | 5.32E-08    |
| ITFG1        | 1528.610044 | -0.579134276 | 0.086013392 | 3.75E-12    | 1.11E-10    |
| ZNF71        | 94.43044057 | 0.579063864  | 0.25160136  | 0.003639384 | 0.017693209 |
| ZNF8         | 105.7544505 | 0.578579824  | 0.21036063  | 0.001103634 | 0.006474129 |
| EEF1A1P4     | 5530.446663 | -0.578321978 | 0.09054296  | 3.81E-11    | 9.69E-10    |
| FLI1         | 1969.190889 | 0.578282639  | 0.099862173 | 1.54E-09    | 3.14E-08    |
| KRT10-AS1    | 62.06232814 | -0.578260108 | 0.288410703 | 0.007119239 | 0.030913705 |
| FABP5P1      | 289.8088471 | -0.578101798 | 0.147707941 | 1.88E-05    | 0.000179817 |
| RAB29        | 1145.305601 | 0.577846323  | 0.094634121 | 2.28E-10    | 5.15E-09    |
| TRIM56       | 370.9047892 | 0.57778041   | 0.172121106 | 0.000154237 | 0.001161772 |
| MEAK7        | 190.9577269 | -0.577534005 | 0.170524107 | 0.000141765 | 0.001077203 |
| CYP4V2       | 85.25316933 | 0.577409472  | 0.255199755 | 0.00395288  | 0.018904175 |
| RPS2P29      | 581.4933596 | -0.5773383   | 0.158399122 | 5.62E-05    | 0.000477811 |
| LINC02381    | 51.31118189 | -0.577114516 | 0.315809796 | 0.010060405 | 0.041009161 |
| KYNU         | 13.60299061 | 0.577063925  | 0.76162895  | 0.022727824 | 0.078778569 |
| RPL3P4       | 5228.254634 | -0.576890245 | 0.087587264 | 9.50E-12    | 2.68E-10    |
| B9D1         | 531.8769201 | -0.576591655 | 0.111874274 | 5.77E-08    | 9.09E-07    |
| MFSD9        | 375.2543041 | 0.576191181  | 0.119038849 | 2.82E-07    | 3.97E-06    |
| DMAC1        | 602.7144407 | -0.575979331 | 0.126932205 | 1.27E-06    | 1.55E-05    |
| IGFLR1       | 294.7135023 | -0.575773528 | 0.175108113 | 0.000206305 | 0.001501718 |
| NXF1         | 1614.283676 | -0.575660746 | 0.086187718 | 5.47E-12    | 1.59E-10    |
| ABHD17C      | 340.1515182 | 0.575633514  | 0.13086798  | 2.32E-06    | 2.70E-05    |
| TOMM7        | 5336.405709 | -0.575450882 | 0.079813322 | 1.35E-13    | 4.78E-12    |
| GLS          | 10225.22791 | -0.575428349 | 0.114782182 | 1.19E-07    | 1.79E-06    |
| SELPLG       | 7966.310814 | 0.575122505  | 0.073055518 | 1.30E-15    | 5.64E-14    |
| LOC105370203 | 17.43015714 | -0.575019563 | 0.596574989 | 0.025436942 | 0.086047063 |
| TMEM208      | 1758.890484 | -0.574941753 | 0.087464258 | 1.15E-11    | 3.20E-10    |
| ZNF706       | 1765.052793 | -0.574480873 | 0.077028275 | 2.05E-14    | 7.88E-13    |
| PERP         | 2361.464688 | -0.574365869 | 0.086369388 | 6.78E-12    | 1.93E-10    |
| TMEM170A     | 662.494323  | -0.574289219 | 0.130341348 | 2.26E-06    | 2.63E-05    |
| SIPA1L1      | 1067.47076  | 0.574144925  | 0.08781674  | 1.41E-11    | 3.90E-10    |
| ZNF254       | 16.00016854 | -0.574057357 | 0.679485148 | 0.024910516 | 0.084616597 |
| APLP1        | 119.0655319 | -0.573248649 | 0.202141038 | 0.000896406 | 0.005408732 |
| FURIN        | 726.1943676 | 0.572881239  | 0.118782454 | 3.11E-07    | 4.35E-06    |
| YEATS2       | 709.1150157 | 0.572504181  | 0.095604933 | 4.82E-10    | 1.06E-08    |
| TMOD1        | 53.30461617 | 0.572357644  | 0.307110158 | 0.009443053 | 0.038897561 |
| ARL6         | 244.7631413 | 0.572340188  | 0.193502684 | 0.000597983 | 0.003818315 |
| LOC100507002 | 82.67152134 | 0.572051847  | 0.243815919 | 0.003355512 | 0.01657916  |
| MIR7847      | 412.7006291 | 0.571895333  | 0.145422731 | 1.76E-05    | 0.000169546 |
| ZNF226       | 83.79146882 | 0.571624376  | 0.238512738 | 0.002915167 | 0.014722062 |
| CCDC57       | 396.787178  | -0.571209123 | 0.141215835 | 1.15E-05    | 0.000115427 |
| NEK2         | 956.3408724 | 0.571080321  | 0.101923396 | 4.72E-09    | 8.92E-08    |

|              |             |              |             |             |             |
|--------------|-------------|--------------|-------------|-------------|-------------|
| KIF18B       | 566.4086506 | 0.5706581    | 0.111553729 | 6.92E-08    | 1.08E-06    |
| ZNF629       | 78.43092738 | -0.570640715 | 0.242397195 | 0.003314605 | 0.016399721 |
| TNRC6C       | 146.0623745 | 0.57038666   | 0.187943126 | 0.000475314 | 0.003122538 |
| MOGS         | 1759.744549 | -0.570349348 | 0.104916729 | 1.24E-08    | 2.16E-07    |
| TMSB4XP4     | 742.9418285 | 0.570325587  | 0.11062229  | 5.62E-08    | 8.90E-07    |
| ZFP64        | 499.0753667 | 0.570244118  | 0.111984483 | 7.96E-08    | 1.23E-06    |
| DISP3        | 9.380011966 | 0.5700232    | 1.038455065 | 0.018084382 | 0.065465065 |
| CORO7-PAM16  | 1056.884523 | -0.56992207  | 0.134051736 | 4.69E-06    | 5.09E-05    |
| SUCLG2       | 2054.178545 | -0.569909892 | 0.096282473 | 7.41E-10    | 1.59E-08    |
| RNF122       | 933.3536288 | -0.56990888  | 0.099671115 | 2.50E-09    | 4.95E-08    |
| MC1R         | 46.74367261 | -0.56918068  | 0.341848185 | 0.013588594 | 0.052210713 |
| EPM2AIP1     | 310.879188  | -0.569141839 | 0.147961922 | 2.53E-05    | 0.000234708 |
| PABPC1       | 36181.08286 | -0.568830858 | 0.071989674 | 6.46E-16    | 2.95E-14    |
| TCF19        | 728.3453318 | 0.568512497  | 0.104698665 | 1.29E-08    | 2.25E-07    |
| CLIP1        | 251.4600707 | 0.568102782  | 0.153591512 | 4.55E-05    | 0.000395362 |
| SERTAD3      | 203.8431677 | -0.567932102 | 0.163296731 | 0.000107495 | 0.000846514 |
| KIF14        | 618.6623333 | 0.567615258  | 0.119038878 | 4.06E-07    | 5.52E-06    |
| KHDC4        | 351.8266085 | -0.567593617 | 0.132078308 | 3.81E-06    | 4.21E-05    |
| NEIL3        | 176.7130955 | 0.567366676  | 0.193730478 | 0.000660833 | 0.004159816 |
| GNA13        | 7875.731471 | -0.567044307 | 0.124660234 | 1.21E-06    | 1.50E-05    |
| UCK1         | 512.2503222 | 0.566976038  | 0.110012984 | 5.79E-08    | 9.11E-07    |
| KRT7         | 36.40034562 | -0.566835326 | 0.375458089 | 0.017407595 | 0.063475957 |
| VDR          | 1255.56403  | 0.566632985  | 0.089368264 | 5.32E-11    | 1.32E-09    |
| NIPSNAP3B    | 15.39639638 | -0.566447121 | 0.666867649 | 0.025597994 | 0.086426295 |
| JDP2         | 30.10745717 | 0.566007681  | 0.391053467 | 0.018656575 | 0.067014294 |
| NCOA3        | 7543.689957 | 0.565823025  | 0.07415169  | 5.49E-15    | 2.23E-13    |
| NAT9         | 339.0439409 | -0.565661703 | 0.128846487 | 2.58E-06    | 2.97E-05    |
| NUDT9        | 332.5801136 | -0.565457054 | 0.133765121 | 5.26E-06    | 5.63E-05    |
| ARHGEF19     | 92.69048149 | 0.565452603  | 0.225350518 | 0.002265808 | 0.011937026 |
| ZNF235       | 41.11604411 | 0.565437826  | 0.369129157 | 0.016538447 | 0.060741523 |
| KRT8P12      | 33.3003771  | 0.565428758  | 0.401586557 | 0.019565743 | 0.069658711 |
| CYHR1        | 140.5055933 | 0.565295456  | 0.199050619 | 0.000882858 | 0.005330703 |
| LOC105372733 | 78.62769244 | -0.565118659 | 0.240344136 | 0.003421019 | 0.016830051 |
| CA13         | 49.67777128 | -0.565058579 | 0.35913508  | 0.015919749 | 0.059045256 |
| DTNB-AS1     | 63.2856822  | 0.564933551  | 0.290095237 | 0.00830208  | 0.034937334 |
| SLC12A4      | 830.7047855 | -0.56476384  | 0.114910185 | 2.06E-07    | 2.96E-06    |
| VPS37B       | 1527.894549 | 0.564608932  | 0.088268008 | 3.74E-11    | 9.54E-10    |
| FABP5P10     | 45.45279351 | -0.564605594 | 0.326147435 | 0.012697689 | 0.049312823 |
| RPL29P26     | 2379.052456 | -0.564545419 | 0.108016391 | 4.06E-08    | 6.62E-07    |
| RNR1         | 42537.64931 | 0.564263869  | 1.225678633 | 0.013352008 | 0.051507401 |
| CHAC1        | 938.9244302 | -0.563526258 | 0.122412147 | 9.58E-07    | 1.21E-05    |
| GM2A         | 3111.283882 | -0.563052458 | 0.075721413 | 2.52E-14    | 9.67E-13    |
| FABP5P11     | 99.92680221 | -0.563007744 | 0.221938165 | 0.002161603 | 0.011478832 |
| CHCHD7       | 1048.251821 | -0.562716878 | 0.08852938  | 4.91E-11    | 1.22E-09    |
| PAK4         | 404.6310018 | 0.562384976  | 0.131208503 | 4.08E-06    | 4.48E-05    |
| ZNF571       | 46.59960505 | 0.562153018  | 0.320221753 | 0.011875526 | 0.046664053 |
| EME1         | 128.2197791 | 0.562021264  | 0.198758677 | 0.000920448 | 0.005540283 |
| KRT81        | 252.8692762 | 0.561973462  | 0.160417442 | 9.79E-05    | 0.000781236 |
| ARHGAP15     | 708.2240825 | -0.561944635 | 0.109460144 | 6.53E-08    | 1.02E-06    |
| PALD1        | 432.1547396 | -0.561581246 | 0.122041646 | 9.74E-07    | 1.23E-05    |

|              |             |              |             |             |             |
|--------------|-------------|--------------|-------------|-------------|-------------|
| S100A4       | 9283.570238 | -0.560661699 | 0.069027011 | 1.13E-16    | 5.32E-15    |
| SYNPO        | 79.3518969  | -0.560210732 | 0.239189802 | 0.003590439 | 0.017504403 |
| IDH1         | 1133.942288 | 0.560148316  | 0.096478939 | 1.51E-09    | 3.08E-08    |
| KCNJ11       | 37.19370018 | 0.560077373  | 0.388678946 | 0.018951391 | 0.067834071 |
| GRSF1        | 2989.697037 | -0.559947412 | 0.078527158 | 2.48E-13    | 8.48E-12    |
| CCP110       | 387.6040976 | -0.55973737  | 0.14394701  | 2.22E-05    | 0.000208134 |
| TRPS1        | 90.51889226 | -0.559658459 | 0.243403363 | 0.003930376 | 0.01883296  |
| EDEM1        | 5672.597231 | -0.559540554 | 0.075467898 | 2.98E-14    | 1.12E-12    |
| MDM4         | 111.5653972 | 0.559226725  | 0.218537877 | 0.001999394 | 0.010722669 |
| ERLIN2       | 1218.162856 | -0.55884989  | 0.087200317 | 3.52E-11    | 9.04E-10    |
| LOC102725101 | 1522.657802 | -0.558834576 | 0.12857321  | 3.12E-06    | 3.52E-05    |
| LOC112268316 | 1522.206104 | -0.558705482 | 0.128559071 | 3.13E-06    | 3.52E-05    |
| PDIA3P1      | 1178.923997 | -0.558492715 | 0.094651768 | 8.81E-10    | 1.86E-08    |
| H3-3B        | 17064.23059 | -0.558387013 | 0.067498348 | 3.24E-17    | 1.58E-15    |
| C6orf223     | 6.185137994 | 0.558249692  | 2.32125337  | 0.009094683 | 0.03764164  |
| C12orf75     | 2404.562392 | 0.558154024  | 0.075198003 | 2.79E-14    | 1.06E-12    |
| FOXO1        | 1747.442779 | 0.557816672  | 0.095826645 | 1.37E-09    | 2.83E-08    |
| PFKP         | 4876.347007 | 0.557544549  | 0.073876441 | 1.07E-14    | 4.24E-13    |
| THEM6        | 304.229368  | 0.557310048  | 0.160994786 | 0.000116382 | 0.000907829 |
| TICAM2       | 83.70619978 | -0.557093438 | 0.235586442 | 0.003368794 | 0.016626815 |
| TESK1        | 248.607665  | 0.556666771  | 0.175455556 | 0.000316271 | 0.002183152 |
| MIR10527     | 27.7970013  | -0.556494093 | 0.489791729 | 0.026129897 | 0.087777191 |
| FAHD1        | 381.7325806 | -0.55632541  | 0.121108115 | 1.01E-06    | 1.27E-05    |
| PRKX         | 854.0147083 | -0.555805669 | 0.093466629 | 6.55E-10    | 1.41E-08    |
| DEK          | 1396.022637 | 0.555406061  | 0.11534759  | 3.39E-07    | 4.69E-06    |
| PLAAT2       | 478.1678296 | 0.555394718  | 0.12382618  | 1.66E-06    | 2.00E-05    |
| ZNF460       | 118.8134877 | 0.555316045  | 0.239225001 | 0.003728474 | 0.017999996 |
| SURF2        | 470.0101729 | 0.555191329  | 0.118754504 | 6.78E-07    | 8.84E-06    |
| RPS2P55      | 4309.146808 | -0.555131344 | 0.087627459 | 5.73E-11    | 1.41E-09    |
| WNT5B        | 554.2763266 | 0.555010662  | 0.117783887 | 5.65E-07    | 7.49E-06    |
| RPS27        | 60699.295   | -0.555005024 | 0.071603515 | 2.26E-15    | 9.53E-14    |
| CORO7        | 1246.616482 | -0.554934338 | 0.126107326 | 2.52E-06    | 2.90E-05    |
| ZBTB20       | 74.62975806 | 0.554812039  | 0.302035785 | 0.010427664 | 0.042210344 |
| LRP1         | 282.5405782 | -0.554411394 | 0.143991488 | 2.67E-05    | 0.000246368 |
| IGKJ2        | 10550.91519 | -0.554359544 | 0.239740768 | 0.003877359 | 0.018630472 |
| HSPBAP1      | 163.1693728 | 0.554333962  | 0.171880004 | 0.000268062 | 0.001887771 |
| ZNF587B      | 69.77442515 | 0.554243101  | 0.263583876 | 0.006235451 | 0.027679905 |
| CORO1A       | 20798.72046 | 0.554168374  | 0.098481015 | 4.24E-09    | 8.08E-08    |
| WDR5B        | 56.12341755 | 0.553996592  | 0.281320516 | 0.008328166 | 0.035021574 |
| MTRR         | 3399.017651 | 0.553928799  | 0.091400497 | 3.19E-10    | 7.13E-09    |
| CRIP1        | 1700.132389 | 0.553843592  | 0.106358294 | 4.52E-08    | 7.29E-07    |
| SMARCC2      | 1405.945153 | 0.553438972  | 0.093210727 | 6.89E-10    | 1.48E-08    |
| BBS9         | 272.762986  | -0.553051508 | 0.140870052 | 1.99E-05    | 0.000188725 |
| G3BP2        | 6276.32925  | -0.553012548 | 0.098885677 | 5.31E-09    | 9.85E-08    |
| SPRR2B       | 26.52510298 | 0.552826715  | 0.423077077 | 0.022856309 | 0.079081458 |
| VEGFA        | 1111.999514 | -0.551890662 | 0.096646292 | 2.73E-09    | 5.37E-08    |
| KC6          | 34.06759246 | -0.551551996 | 0.384059881 | 0.020286913 | 0.07173953  |
| ZNF462       | 13.1046982  | 0.551489514  | 0.692377594 | 0.025565387 | 0.086349875 |
| RPS2P12      | 632.0174741 | -0.551381988 | 0.166811443 | 0.000209508 | 0.001521832 |
| LOXL1-AS1    | 53.71745646 | 0.551129919  | 0.298938193 | 0.010554117 | 0.042612649 |

|              |             |              |             |             |             |
|--------------|-------------|--------------|-------------|-------------|-------------|
| IGKV3-20     | 96725.19326 | -0.5509607   | 0.080882552 | 2.32E-12    | 7.02E-11    |
| RPS15AP38    | 1395.659248 | -0.550918206 | 0.087090843 | 6.12E-11    | 1.50E-09    |
| DBIL5P       | 38.32652515 | 0.550891235  | 0.365279152 | 0.018091491 | 0.065465065 |
| ERBB2        | 57.72938098 | 0.55072343   | 0.279962714 | 0.008377083 | 0.035193097 |
| HIGD1C       | 386.2299929 | 0.55047302   | 0.128862745 | 4.47E-06    | 4.87E-05    |
| RESF1        | 1213.156276 | 0.550332632  | 0.09384141  | 1.08E-09    | 2.24E-08    |
| NAA80        | 54.01204133 | -0.549841541 | 0.299197393 | 0.010994847 | 0.04399209  |
| LOC124900458 | 24.62602564 | -0.549700066 | 0.505220766 | 0.026450098 | 0.08873234  |
| NECTIN3      | 138.8635714 | 0.549155103  | 0.224513332 | 0.002782998 | 0.014186983 |
| SLCO4A1-AS2  | 98.89398172 | 0.548986151  | 0.217632178 | 0.002312671 | 0.012143277 |
| RPL3P7       | 392.8677013 | -0.548966665 | 0.141061556 | 2.27E-05    | 0.000212411 |
| RPL14        | 30376.55016 | -0.548906006 | 0.062537234 | 4.93E-19    | 2.78E-17    |
| TTC8         | 151.1252325 | -0.548880017 | 0.173280745 | 0.000335984 | 0.002303338 |
| SHISA3       | 14.78611044 | 0.548859381  | 0.638360529 | 0.026555435 | 0.089033971 |
| SRGAP2B      | 216.1337153 | 0.548844709  | 0.165726376 | 0.000201104 | 0.001468944 |
| TTC32        | 860.3397049 | 0.548426001  | 0.134177477 | 9.94E-06    | 0.000100388 |
| FAM227B      | 35.89554873 | -0.548213239 | 0.372436036 | 0.019501209 | 0.069443231 |
| NTRK1        | 28.88751146 | -0.547577632 | 0.433323694 | 0.024290287 | 0.0829164   |
| PCGF5        | 1738.192007 | 0.547251697  | 0.151663674 | 6.88E-05    | 0.000572089 |
| PTDSS2       | 388.9467019 | -0.547044532 | 0.141492298 | 2.59E-05    | 0.000239699 |
| ATP6V1G2     | 19.17236609 | -0.54695609  | 0.520996542 | 0.028006429 | 0.092749538 |
| AURKA        | 2667.359364 | 0.546799724  | 0.080952709 | 3.56E-12    | 1.05E-10    |
| TMEM106A     | 120.1497992 | -0.546797586 | 0.218350703 | 0.002463028 | 0.01281233  |
| KNL1         | 435.0802575 | 0.54677466   | 0.138008863 | 1.68E-05    | 0.000162712 |
| MYO1F        | 546.0334604 | 0.546608371  | 0.110410756 | 1.79E-07    | 2.60E-06    |
| FKTN         | 542.2317564 | -0.546566653 | 0.121228255 | 1.54E-06    | 1.86E-05    |
| CTSO         | 113.1724826 | 0.546127611  | 0.211552309 | 0.001982974 | 0.010661027 |
| DNLZ         | 218.0269549 | 0.54608569   | 0.187782587 | 0.00076609  | 0.004737991 |
| FAM81A       | 134.2518978 | -0.546045012 | 0.192878042 | 0.000981515 | 0.005852927 |
| EEF1A1P12    | 4429.394256 | -0.545898715 | 0.101031869 | 1.59E-08    | 2.73E-07    |
| NRROS        | 3691.1547   | 0.545854756  | 0.104657547 | 4.47E-08    | 7.21E-07    |
| TRIM14       | 714.1684134 | 0.545501054  | 0.101628431 | 1.95E-08    | 3.32E-07    |
| ZNF136       | 249.2948571 | 0.544807086  | 0.152251855 | 7.71E-05    | 0.000632724 |
| LINC00963    | 116.0750331 | 0.544693585  | 0.214862944 | 0.002276999 | 0.011985044 |
| APRT         | 3634.244898 | -0.544582583 | 0.105817871 | 6.50E-08    | 1.02E-06    |
| MAST4        | 171.2791455 | 0.543996338  | 0.18491947  | 0.000695468 | 0.004349377 |
| BLVRA        | 671.6274366 | 0.543979756  | 0.097721598 | 6.42E-09    | 1.18E-07    |
| ETFBKMT      | 33.05941193 | 0.543957329  | 0.425992725 | 0.02385787  | 0.081730313 |
| PPP1R16B     | 744.7832979 | 0.543910587  | 0.096039351 | 3.65E-09    | 7.03E-08    |
| ADAM8        | 745.397412  | 0.543440824  | 0.131325424 | 8.21E-06    | 8.43E-05    |
| SEPTIN11     | 4474.4132   | -0.543191218 | 0.073631741 | 4.07E-14    | 1.53E-12    |
| TMEM19       | 810.8206158 | 0.543159653  | 0.109208142 | 1.58E-07    | 2.31E-06    |
| PYROXD2      | 176.3571166 | -0.542792283 | 0.172296732 | 0.000363633 | 0.002466525 |
| PLXNA3       | 102.6045868 | -0.542781996 | 0.225140891 | 0.003204323 | 0.015974326 |
| ARHGAP31     | 494.1563718 | 0.54277525   | 0.119577265 | 1.34E-06    | 1.64E-05    |
| LRRC27       | 28.93701723 | -0.542517506 | 0.415734333 | 0.024019909 | 0.08217776  |
| XYLT1        | 796.8134747 | -0.542372485 | 0.097706379 | 7.04E-09    | 1.28E-07    |
| BBLN         | 1090.549447 | 0.54207629   | 0.156718687 | 0.000126182 | 0.000975056 |
| CSRP2        | 23.98943504 | 0.541947816  | 0.451231    | 0.025792298 | 0.086896642 |
| COX5AP1      | 20.54390901 | 0.541914827  | 0.681962877 | 0.02551447  | 0.086228352 |

|            |             |              |             |             |             |
|------------|-------------|--------------|-------------|-------------|-------------|
| MAP1LC3B   | 4375.174495 | -0.541862879 | 0.075083028 | 1.37E-13    | 4.82E-12    |
| GOT2       | 6934.858223 | -0.541789741 | 0.068743578 | 8.40E-16    | 3.74E-14    |
| RNF157     | 112.7512792 | -0.541715167 | 0.220653634 | 0.00290179  | 0.014677475 |
| ODC1       | 42714.64366 | -0.541625939 | 0.06121239  | 3.09E-19    | 1.78E-17    |
| SDAD1      | 1295.445028 | -0.541624678 | 0.083314458 | 2.05E-11    | 5.46E-10    |
| LIPH       | 174.5384569 | -0.541374342 | 0.178431496 | 0.000528377 | 0.003421805 |
| CALML4     | 70.65882146 | -0.540763399 | 0.274192962 | 0.008656567 | 0.036130581 |
| CXXC5      | 1454.696236 | 0.540329281  | 0.082586676 | 1.53E-11    | 4.21E-10    |
| IGKV3-11   | 5001.153509 | -0.540314416 | 0.098505993 | 1.05E-08    | 1.86E-07    |
| FUT1       | 32.85703673 | 0.540220702  | 0.398706138 | 0.022831287 | 0.079026464 |
| PALM2AKAP2 | 3478.791016 | 0.540212479  | 0.103833188 | 4.85E-08    | 7.79E-07    |
| GAA        | 1890.259599 | -0.540196814 | 0.108279258 | 1.51E-07    | 2.23E-06    |
| RBKS       | 103.7280473 | -0.539965622 | 0.206717237 | 0.001893945 | 0.010258821 |
| REL        | 253.8557455 | -0.539781696 | 0.173401142 | 0.000410734 | 0.002749395 |
| PDIA3      | 12638.76885 | -0.539521409 | 0.060794143 | 1.95E-19    | 1.15E-17    |
| HERC5      | 100.6441527 | -0.539449593 | 0.215124748 | 0.002527796 | 0.013090266 |
| OGFOD1     | 1565.141333 | -0.538734385 | 0.083082416 | 2.27E-11    | 5.97E-10    |
| ZFAND5     | 2942.888067 | -0.538714102 | 0.08951863  | 4.47E-10    | 9.90E-09    |
| RGS19      | 445.507386  | 0.53870663   | 0.144804198 | 4.68E-05    | 0.000405146 |
| TPD52L1    | 39.39427205 | 0.53863589   | 0.338978199 | 0.017036167 | 0.062318401 |
| PHKB       | 1191.326212 | -0.538518745 | 0.093627934 | 2.25E-09    | 4.51E-08    |
| ARHGAP45   | 1963.18216  | 0.538446445  | 0.112906531 | 4.38E-07    | 5.92E-06    |
| SMCO2      | 23.63346984 | 0.538295221  | 0.46156788  | 0.02671832  | 0.089406984 |
| RPS20      | 30356.53221 | -0.538293516 | 0.074467073 | 1.27E-13    | 4.51E-12    |
| MCTP2      | 723.5745405 | 0.538237802  | 0.106127904 | 9.67E-08    | 1.47E-06    |
| TSHZ1      | 321.9984907 | 0.538205725  | 0.127472969 | 5.78E-06    | 6.15E-05    |
| MRPS18C    | 789.2560066 | -0.538077948 | 0.096379659 | 5.99E-09    | 1.10E-07    |
| ZNF396     | 15.27693504 | 0.537971516  | 0.604260152 | 0.028412556 | 0.093771723 |
| RORA       | 588.3637509 | 0.537927446  | 0.174201823 | 0.000437005 | 0.002904878 |
| ZNF232     | 226.6115859 | 0.537433085  | 0.148241819 | 6.71E-05    | 0.000560035 |
| TUFM       | 10709.86573 | -0.53715568  | 0.071309441 | 1.30E-14    | 5.05E-13    |
| ZFH3       | 110.9929989 | 0.537134501  | 0.211163843 | 0.002243788 | 0.011839146 |
| TMEM70     | 1582.686689 | -0.536950145 | 0.079604399 | 3.93E-12    | 1.16E-10    |
| ATP6V1H    | 1052.199441 | -0.536344541 | 0.088374162 | 3.33E-10    | 7.42E-09    |
| EPS8L1     | 99.21540164 | 0.535589894  | 0.218713079 | 0.002945814 | 0.014846526 |
| NAGK       | 1027.685445 | 0.535433334  | 0.09927408  | 1.74E-08    | 2.98E-07    |
| ZNF567     | 216.3341734 | 0.535289521  | 0.167542853 | 0.00031479  | 0.002174402 |
| PAPSS2     | 361.0020827 | 0.535219997  | 0.132992191 | 1.36E-05    | 0.000133934 |
| SLX1B      | 295.2961644 | 0.53521102   | 0.17371849  | 0.000463857 | 0.003061212 |
| SLX1A      | 295.7545634 | 0.534939581  | 0.174472284 | 0.000487248 | 0.003186436 |
| WHRN       | 325.5431199 | -0.534921285 | 0.135497597 | 1.90E-05    | 0.000181368 |
| MFSD13A    | 137.5151728 | -0.534564868 | 0.197851578 | 0.001513816 | 0.008467296 |
| DOLPP1     | 998.5222512 | 0.53429002   | 0.102886191 | 5.21E-08    | 8.29E-07    |
| PHF19      | 3420.269221 | 0.534278073  | 0.095811995 | 6.22E-09    | 1.15E-07    |
| PCGF3      | 335.6336231 | 0.534238956  | 0.131781378 | 1.22E-05    | 0.000121524 |
| MIR4721    | 257.3044405 | -0.534076525 | 0.210408986 | 0.002378065 | 0.012429481 |
| CYTH4      | 44.25533909 | 0.534020953  | 0.325949168 | 0.016131202 | 0.059625192 |
| MTRF1      | 245.642904  | 0.533809477  | 0.139598558 | 3.14E-05    | 0.000284671 |
| HSDL1      | 1494.042687 | -0.533333745 | 0.098800778 | 1.71E-08    | 2.94E-07    |
| SLC44A2    | 53.57411793 | -0.53322222  | 0.296928223 | 0.012468688 | 0.048600648 |



|              |             |              |             |             |             |
|--------------|-------------|--------------|-------------|-------------|-------------|
| HELQ         | 260.4746837 | -0.532802613 | 0.138695752 | 2.95E-05    | 0.000269127 |
| PTPRR        | 87.90000464 | 0.53232688   | 0.239153658 | 0.005081743 | 0.02339196  |
| HSD17B7P2    | 251.5700453 | -0.531536188 | 0.151641205 | 0.000109878 | 0.000862975 |
| BBC3         | 660.1906889 | -0.531281277 | 0.144015551 | 5.47E-05    | 0.000466769 |
| LINC00641    | 216.5697131 | -0.530911002 | 0.153896395 | 0.000131878 | 0.001013194 |
| TUBA4B       | 78.47552715 | -0.530904986 | 0.251358066 | 0.006853094 | 0.029938199 |
| CPQ          | 18.52722013 | 0.530304526  | 0.583563666 | 0.029114923 | 0.095634128 |
| ZNF264       | 267.7589652 | 0.530284934  | 0.15135732  | 0.000107775 | 0.000848338 |
| ALDH18A1     | 3659.58003  | -0.53025658  | 0.067112255 | 7.47E-16    | 3.36E-14    |
| FAM88B       | 44.65010626 | 0.529843293  | 0.321560831 | 0.01629736  | 0.06009825  |
| RASSF3       | 1739.204846 | 0.52977445   | 0.113273467 | 7.25E-07    | 9.42E-06    |
| DLG3         | 975.2083457 | 0.529396451  | 0.088623467 | 5.99E-10    | 1.30E-08    |
| ORAI1        | 200.8934608 | 0.529178669  | 0.2276748   | 0.004079504 | 0.019418574 |
| SLC16A9      | 230.7351715 | -0.528770207 | 0.166741141 | 0.000354367 | 0.002410284 |
| TLE5         | 7343.174497 | 0.528768262  | 0.079096176 | 6.04E-12    | 1.74E-10    |
| USP18        | 29.83531821 | 0.528400277  | 0.389776957 | 0.023999857 | 0.082135478 |
| DHFR2        | 133.0653032 | 0.528398773  | 0.190392604 | 0.001211449 | 0.006992886 |
| MED18        | 83.7956728  | 0.527889777  | 0.247487524 | 0.006378489 | 0.028206407 |
| RPS15A       | 28811.9415  | -0.527800245 | 0.070926168 | 2.55E-14    | 9.74E-13    |
| SORT1        | 2995.595199 | 0.527603276  | 0.070907881 | 2.65E-14    | 1.01E-12    |
| RPSAP47      | 1083.858483 | -0.527032796 | 0.089536582 | 1.05E-09    | 2.20E-08    |
| NFATC1       | 196.1270058 | 0.526959455  | 0.1564701   | 0.000181052 | 0.001339862 |
| GRHRP        | 609.3857749 | -0.526723366 | 0.11354318  | 9.08E-07    | 1.16E-05    |
| TMEM42       | 84.25735315 | -0.526670937 | 0.243788202 | 0.0061936   | 0.027529406 |
| DAP          | 2411.86563  | -0.526580631 | 0.084972752 | 1.54E-10    | 3.58E-09    |
| ZNF441       | 124.7987389 | 0.526363398  | 0.19770699  | 0.0016844   | 0.009289927 |
| MAPKAPK2     | 1343.491791 | 0.526088582  | 0.091978453 | 2.78E-09    | 5.45E-08    |
| GBGT1        | 14.5083336  | 0.52573515   | 0.621647808 | 0.029244232 | 0.095931495 |
| MRPS25       | 2164.321353 | -0.525563812 | 0.079394577 | 9.64E-12    | 2.71E-10    |
| HELB         | 135.1620382 | 0.525235262  | 0.192791603 | 0.001440293 | 0.008111072 |
| PRKD2        | 2032.394394 | -0.525102965 | 0.086775623 | 3.76E-10    | 8.35E-09    |
| CASC9        | 281.9428683 | -0.524704195 | 0.173803863 | 0.000585167 | 0.003748924 |
| LOC102724858 | 60.43369717 | -0.524660523 | 0.296837268 | 0.013463783 | 0.051834668 |
| AZGP1        | 29.79900051 | 0.524568315  | 0.395538695 | 0.025154775 | 0.08527902  |
| ARRDC1       | 245.861089  | 0.524481271  | 0.174703906 | 0.000619429 | 0.003937831 |
| ATF5         | 1180.78297  | -0.524306623 | 0.095776705 | 1.16E-08    | 2.05E-07    |
| DYNC2H1      | 14.3689676  | -0.52405557  | 0.662827176 | 0.028811191 | 0.094870394 |
| PRDM1        | 3481.685965 | -0.523769149 | 0.083780105 | 1.03E-10    | 2.45E-09    |
| SRGAP2D      | 84.88130141 | 0.523503524  | 0.237944443 | 0.0055777   | 0.025219068 |
| RABAC1       | 2038.514125 | -0.523415391 | 0.134205875 | 2.43E-05    | 0.000225434 |
| KIFC2        | 38.93030605 | -0.523261821 | 0.379098059 | 0.02406347  | 0.082271888 |
| STAP2        | 41.03756402 | -0.523084526 | 0.371219279 | 0.023615037 | 0.081074862 |
| GYG1         | 2881.320945 | -0.522731554 | 0.081293824 | 3.47E-11    | 8.92E-10    |
| MPP7         | 28.25793817 | 0.522666765  | 0.441760954 | 0.028092704 | 0.092911144 |
| ZNF652       | 575.1153274 | 0.522241263  | 0.143894905 | 6.88E-05    | 0.000572089 |
| ZNRF2        | 909.0184476 | 0.522146931  | 0.146541689 | 8.85E-05    | 0.000712252 |
| PGRMC2       | 1603.865361 | -0.522056123 | 0.103269366 | 1.17E-07    | 1.76E-06    |
| ANXA5        | 11038.62175 | -0.52187895  | 0.071133788 | 6.18E-14    | 2.25E-12    |
| TGFBR3L      | 24.59855441 | -0.52183043  | 0.471049199 | 0.030403118 | 0.098630722 |
| ZNF467       | 146.1933122 | 0.521707169  | 0.193903089 | 0.001608227 | 0.008931898 |

|              |             |              |             |             |             |
|--------------|-------------|--------------|-------------|-------------|-------------|
| IGKC         | 466566.6229 | -0.521280634 | 0.073272349 | 2.94E-13    | 9.91E-12    |
| LOC102724745 | 79.18948327 | 0.520732106  | 0.233805672 | 0.00535264  | 0.024411817 |
| CD44         | 5427.036428 | 0.520656523  | 0.0752931   | 1.26E-12    | 3.99E-11    |
| LINC01943    | 105.8823985 | -0.520628632 | 0.213944802 | 0.003235861 | 0.016092878 |
| NDOR1        | 265.0542873 | 0.520517933  | 0.144750744 | 8.00E-05    | 0.000652909 |
| IGHJ1        | 58.4490431  | -0.520441436 | 0.284397879 | 0.012398607 | 0.048368254 |
| LRRC28       | 378.8690787 | 0.520372292  | 0.118046476 | 2.65E-06    | 3.03E-05    |
| GLUL         | 1706.864411 | 0.520268141  | 0.083019965 | 9.90E-11    | 2.36E-09    |
| LOC105376156 | 112.8722919 | -0.520113657 | 0.205959896 | 0.002578742 | 0.013282593 |
| NEUROG2-AS1  | 23.91428153 | -0.520051528 | 0.496441133 | 0.03063696  | 0.09930655  |
| P4HB         | 45709.06162 | -0.520036668 | 0.078694573 | 1.08E-11    | 3.02E-10    |
| ZNF446       | 66.17801694 | 0.519967444  | 0.298100688 | 0.014401904 | 0.054620623 |
| HTR2C        | 187.7206444 | 0.519818487  | 0.182313656 | 0.001001135 | 0.005954028 |
| CLCN7        | 807.5596281 | -0.519636941 | 0.129337806 | 1.52E-05    | 0.000148216 |
| SLC27A5      | 485.7901713 | -0.519631108 | 0.15163444  | 0.000151636 | 0.001144676 |
| CREM         | 236.2287    | -0.519592635 | 0.147962269 | 0.000110332 | 0.000865707 |
| NSMCE2       | 776.9157513 | -0.519497881 | 0.10390985  | 1.51E-07    | 2.23E-06    |
| SPRED2       | 437.6095867 | 0.519493814  | 0.116475297 | 2.09E-06    | 2.46E-05    |
| LYPD3        | 7.048032621 | 0.519473673  | 1.115241101 | 0.015318357 | 0.057256204 |
| RPL29P11     | 1968.28779  | -0.519469118 | 0.080171502 | 2.55E-11    | 6.67E-10    |
| GLDCP1       | 514.8996996 | -0.519222939 | 0.119759855 | 3.73E-06    | 4.13E-05    |
| ZNF253       | 269.6685988 | 0.519126805  | 0.143795367 | 7.50E-05    | 0.000617231 |
| SPC24        | 191.8404541 | 0.518893427  | 0.167103074 | 0.000457806 | 0.003027043 |
| SLC29A3      | 245.0191551 | 0.518613891  | 0.142339388 | 6.69E-05    | 0.00055893  |
| KDM5B        | 1455.695113 | -0.518566889 | 0.079284399 | 1.68E-11    | 4.55E-10    |
| EEF1A1P24    | 120.6631268 | -0.518137535 | 0.218873826 | 0.003947502 | 0.018888888 |
| UTS2R        | 152.5224437 | 0.517685855  | 0.192876911 | 0.001643832 | 0.009103373 |
| RPSAP15      | 5050.972217 | -0.51762677  | 0.077444746 | 6.45E-12    | 1.85E-10    |
| MAPKAPK3     | 1599.376237 | -0.517255809 | 0.089908211 | 2.41E-09    | 4.80E-08    |
| FBXO48       | 135.7731431 | 0.516681812  | 0.192874614 | 0.001671417 | 0.009223689 |
| NELFB        | 1233.070081 | 0.516614032  | 0.110647055 | 7.98E-07    | 1.03E-05    |
| HNRNPDL      | 6519.833783 | -0.516419106 | 0.081763461 | 7.35E-11    | 1.79E-09    |
| SLC5A3       | 2752.476005 | -0.516338583 | 0.10673237  | 3.49E-07    | 4.82E-06    |
| CCDC50       | 2100.527816 | 0.516190168  | 0.102828557 | 1.37E-07    | 2.04E-06    |
| FECH         | 1304.258523 | -0.516114329 | 0.082492121 | 1.06E-10    | 2.52E-09    |
| MEX3A        | 96.56957458 | 0.5160207    | 0.247863429 | 0.007499992 | 0.032203658 |
| SPTBN1       | 984.625646  | 0.515763482  | 0.092509987 | 6.60E-09    | 1.21E-07    |
| IGF2R        | 5506.242351 | -0.515707751 | 0.07210166  | 2.37E-13    | 8.14E-12    |
| NAB2         | 650.5707069 | -0.515623059 | 0.116159434 | 2.43E-06    | 2.81E-05    |
| SLC10A7      | 393.979907  | -0.515561547 | 0.158024133 | 0.000269426 | 0.001896603 |
| POF1B        | 91.10378509 | 0.515447946  | 0.230587859 | 0.005305456 | 0.024215755 |
| TBC1D32      | 50.03247233 | -0.515205856 | 0.297055013 | 0.0150284   | 0.056379289 |
| REST         | 1334.713841 | 0.515178889  | 0.120957406 | 5.27E-06    | 5.64E-05    |
| PHB2         | 11013.08429 | -0.514866499 | 0.090449904 | 3.43E-09    | 6.64E-08    |
| MIIP         | 165.8924199 | 0.514680417  | 0.18468517  | 0.001242426 | 0.007124201 |
| SF3B2        | 7418.509001 | -0.514658438 | 0.075195494 | 2.14E-12    | 6.53E-11    |
| TAP2         | 1995.542624 | 0.514610993  | 0.083480938 | 1.93E-10    | 4.42E-09    |
| FCSK         | 209.6381685 | -0.514386977 | 0.16470484  | 0.000443008 | 0.00293803  |
| SMG6         | 620.618219  | 0.514383809  | 0.106860309 | 3.91E-07    | 5.33E-06    |
| NEU1         | 3013.211036 | -0.514198395 | 0.099033782 | 5.65E-08    | 8.93E-07    |

|              |             |              |             |             |             |
|--------------|-------------|--------------|-------------|-------------|-------------|
| CCNB2        | 1917.095578 | 0.514177353  | 0.07826556  | 1.48E-11    | 4.06E-10    |
| NPAS1        | 32.38119742 | -0.513821583 | 0.437919225 | 0.030172115 | 0.098101861 |
| PIM3         | 3435.364498 | -0.513809107 | 0.115425511 | 2.35E-06    | 2.73E-05    |
| CENPF        | 374.7446848 | 0.513370409  | 0.182607557 | 0.001138289 | 0.006645904 |
| ITPR2        | 944.910194  | 0.513365146  | 0.107376094 | 4.59E-07    | 6.17E-06    |
| DCLRE1C      | 407.8360372 | 0.513280333  | 0.122596841 | 7.31E-06    | 7.58E-05    |
| CRTAP        | 3348.212911 | -0.51317987  | 0.080119618 | 4.21E-11    | 1.07E-09    |
| RPL3P2       | 1982.377018 | -0.513141607 | 0.11711973  | 3.16E-06    | 3.56E-05    |
| PCM1         | 1976.707895 | -0.513135676 | 0.083505608 | 2.18E-10    | 4.93E-09    |
| TMEM44       | 93.48991016 | 0.512820328  | 0.234838807 | 0.006145297 | 0.027363876 |
| RPL30        | 28290.10188 | -0.512598733 | 0.067583863 | 1.29E-14    | 5.05E-13    |
| USP33        | 736.9947808 | 0.512433378  | 0.100006763 | 7.99E-08    | 1.23E-06    |
| ZXDB         | 140.3161653 | -0.512428679 | 0.205540136 | 0.002856803 | 0.014503447 |
| JUND         | 7121.981625 | -0.512268692 | 0.237907422 | 0.006708739 | 0.029396565 |
| LOC124901066 | 9.782570597 | -0.511785596 | 0.81526216  | 0.023272878 | 0.080106624 |
| RHOF         | 435.9533062 | 0.511710188  | 0.122654629 | 7.92E-06    | 8.16E-05    |
| BTBD6        | 433.4411327 | 0.511426721  | 0.127258915 | 1.52E-05    | 0.000148346 |
| TMEM147-AS1  | 85.81316667 | -0.511330841 | 0.242319827 | 0.007407825 | 0.031910775 |
| PAQR3        | 671.599016  | -0.511148684 | 0.16445935  | 0.000459635 | 0.003034503 |
| C4orf3       | 1463.765365 | -0.510941122 | 0.094428141 | 1.73E-08    | 2.97E-07    |
| ICAM4        | 338.9586415 | -0.510888593 | 0.133856785 | 3.58E-05    | 0.000319771 |
| RAB23        | 151.3962551 | 0.510855459  | 0.207846245 | 0.003081733 | 0.015428263 |
| LILRB4       | 4375.70188  | 0.510741174  | 0.073899403 | 1.33E-12    | 4.18E-11    |
| ZNF101       | 263.2532885 | 0.510167714  | 0.140596215 | 7.29E-05    | 0.000602546 |
| VASH2        | 50.86590213 | 0.5100522    | 0.334420618 | 0.020944239 | 0.073657877 |
| GDAP1        | 259.0456959 | -0.510042204 | 0.146473501 | 0.000123042 | 0.000952912 |
| SFMBT2       | 1659.848427 | 0.509583613  | 0.082179948 | 1.56E-10    | 3.61E-09    |
| NUP93        | 1751.259737 | -0.509084357 | 0.089269206 | 3.34E-09    | 6.47E-08    |
| RALGPS1      | 105.7245782 | 0.509072299  | 0.206744962 | 0.003115665 | 0.015580126 |
| DCAF8        | 2751.745521 | -0.509070529 | 0.072120331 | 4.71E-13    | 1.57E-11    |
| ZNF461       | 47.17483621 | 0.508729624  | 0.313050282 | 0.018273865 | 0.065954257 |
| STX3         | 438.3051416 | -0.508720472 | 0.125454268 | 1.32E-05    | 0.000130466 |
| USP7         | 4830.004388 | -0.50837249  | 0.082201585 | 1.74E-10    | 4.02E-09    |
| RAC2         | 4174.968786 | 0.507954509  | 0.082546047 | 2.07E-10    | 4.70E-09    |
| UQCRB        | 7700.555549 | -0.50782195  | 0.077517433 | 1.56E-11    | 4.28E-10    |
| LOC105378512 | 49.58485831 | -0.507741822 | 0.334165505 | 0.021331423 | 0.074800492 |
| SERINC2      | 41.59062855 | 0.507445501  | 0.380399645 | 0.026959117 | 0.089986704 |
| ATP1B1       | 80.8990027  | 0.5073183    | 0.239046022 | 0.007130604 | 0.030955294 |
| MYH11        | 11.78368887 | 0.506915671  | 0.72146528  | 0.027197879 | 0.090569059 |
| WDR5         | 2042.322027 | 0.506640056  | 0.077568199 | 1.85E-11    | 4.99E-10    |
| ECT2         | 1256.306489 | 0.50661607   | 0.119285935 | 5.73E-06    | 6.10E-05    |
| DNMT3A       | 111.6731616 | 0.506542357  | 0.197740895 | 0.002417591 | 0.012613867 |
| KLHL21       | 1787.06493  | -0.506267919 | 0.11322317  | 2.13E-06    | 2.50E-05    |
| TIRAP        | 104.2381564 | 0.506125059  | 0.213634339 | 0.004034556 | 0.019231052 |
| PIR-FIGF     | 114.0142174 | 0.506009892  | 0.202503433 | 0.002892381 | 0.014641144 |
| MYH9         | 3646.667655 | 0.505974953  | 0.09974018  | 1.07E-07    | 1.61E-06    |
| IL17D        | 60.6461664  | -0.5058978   | 0.284467905 | 0.014445478 | 0.054725955 |
| PDK3         | 881.8795724 | 0.50551655   | 0.118141651 | 5.04E-06    | 5.42E-05    |
| CLEC1A       | 8.498841094 | 0.505323523  | 0.928303914 | 0.018708207 | 0.067171888 |
| ZNF197       | 117.0615253 | -0.505316566 | 0.211249947 | 0.003774637 | 0.018177249 |

|               |             |              |             |             |             |
|---------------|-------------|--------------|-------------|-------------|-------------|
| P2RY8         | 2279.273354 | 0.505171426  | 0.083767743 | 4.59E-10    | 1.02E-08    |
| HLA-E         | 9786.13584  | 0.505146729  | 0.076486743 | 6.46E-12    | 1.85E-10    |
| ZNF696        | 112.9535964 | 0.504880366  | 0.211120768 | 0.00380421  | 0.018302162 |
| ARRDC1-AS1    | 74.38791046 | 0.504493265  | 0.261314561 | 0.010874713 | 0.043591994 |
| IGKV3D-20     | 89740.54299 | -0.504150804 | 0.082490097 | 2.76E-10    | 6.19E-09    |
| EEF1A1P6      | 76800.0169  | -0.503941163 | 0.065094404 | 3.53E-15    | 1.46E-13    |
| CLSPN         | 556.5895199 | 0.503741138  | 0.108413108 | 9.23E-07    | 1.17E-05    |
| GAS6          | 762.6551032 | -0.503608051 | 0.113718411 | 2.64E-06    | 3.02E-05    |
| MRPS6         | 2053.681489 | -0.503513442 | 0.080042806 | 9.07E-11    | 2.19E-09    |
| IGKV3D-11     | 4431.485928 | -0.503023134 | 0.095011296 | 3.39E-08    | 5.56E-07    |
| ARNTL2        | 533.7193495 | 0.502610453  | 0.115417893 | 3.60E-06    | 4.00E-05    |
| CCNL1         | 1066.062457 | -0.502444797 | 0.112450708 | 2.14E-06    | 2.51E-05    |
| LINC01518     | 68.36159612 | 0.502404291  | 0.266005411 | 0.011906053 | 0.046762786 |
| PIP4K2A       | 1461.0414   | 0.50233515   | 0.091214731 | 1.02E-08    | 1.83E-07    |
| RPS4XP17      | 37.47606325 | -0.502212962 | 0.349926419 | 0.025002598 | 0.084829543 |
| GCSHP5        | 925.6329971 | -0.502138356 | 0.104109321 | 3.91E-07    | 5.32E-06    |
| PTDSS1        | 5606.7099   | -0.502011996 | 0.07134144  | 5.78E-13    | 1.90E-11    |
| IP6K2         | 1172.525797 | -0.501945993 | 0.086853547 | 2.16E-09    | 4.33E-08    |
| PIR           | 201.0829503 | 0.501723375  | 0.163993492 | 0.000561692 | 0.003611269 |
| SLC48A1       | 280.520833  | 0.50149221   | 0.158297868 | 0.000390665 | 0.002629284 |
| ZNF681        | 138.1780452 | -0.501402808 | 0.209978581 | 0.003898099 | 0.018709364 |
| ESPL1         | 653.2295044 | 0.500850786  | 0.111624639 | 2.01E-06    | 2.37E-05    |
| ENPP1         | 142.8149307 | 0.500004794  | 0.206996072 | 0.003663892 | 0.017767466 |
| FOXP4         | 376.8985249 | 0.500003562  | 0.14984801  | 0.000219014 | 0.001580276 |
| RFESD         | 71.4946931  | -0.499954446 | 0.266932529 | 0.012354796 | 0.048235176 |
| INPP5F        | 1022.866844 | 0.499747085  | 0.097209129 | 7.72E-08    | 1.19E-06    |
| MRPS28        | 615.9379422 | -0.499719143 | 0.10072469  | 1.98E-07    | 2.85E-06    |
| IGHV3-23      | 51958.95357 | -0.499669821 | 0.104093133 | 6.37E-07    | 8.37E-06    |
| MTLN          | 191.9684678 | 0.499301768  | 0.199814639 | 0.002958451 | 0.014892877 |
| MTM1          | 463.4079071 | 0.499134677  | 0.11757686  | 5.92E-06    | 6.27E-05    |
| CDK17         | 1560.569035 | 0.499094547  | 0.114984096 | 3.86E-06    | 4.25E-05    |
| HEATR5B       | 886.8638224 | 0.498981156  | 0.091882392 | 1.58E-08    | 2.72E-07    |
| ZNF660-ZNF197 | 116.7549208 | -0.498502076 | 0.211298719 | 0.004210147 | 0.019952688 |
| C16orf74      | 257.8872009 | -0.498372024 | 0.180467122 | 0.001446741 | 0.008144736 |
| SARAF         | 7239.38295  | -0.498352591 | 0.089263435 | 6.83E-09    | 1.25E-07    |
| ATP6V0E2      | 577.8257756 | -0.498314896 | 0.128569472 | 2.94E-05    | 0.000267745 |
| RAPGEF1       | 1640.771897 | 0.49830167   | 0.088322735 | 4.78E-09    | 9.00E-08    |
| RPL19P4       | 58.45576086 | 0.498252131  | 0.352398243 | 0.025390911 | 0.085911374 |
| RPL3          | 98139.73188 | -0.498124838 | 0.071964123 | 1.47E-12    | 4.61E-11    |
| OSGEPL1       | 199.0462264 | 0.497625445  | 0.158462047 | 0.000438295 | 0.002911377 |
| IGHJ6         | 667.0959219 | -0.497566042 | 0.111775469 | 2.41E-06    | 2.79E-05    |
| DPY19L1P2     | 45.84398283 | -0.497503895 | 0.311503361 | 0.020354837 | 0.071879753 |
| ZYX           | 492.5083046 | 0.497224452  | 0.151973781 | 0.000277558 | 0.001945943 |
| CASP10        | 2036.104477 | 0.496949304  | 0.077873042 | 5.07E-11    | 1.26E-09    |
| EEF1A1P14     | 2150.044178 | -0.496761731 | 0.099712585 | 1.80E-07    | 2.62E-06    |
| LOC124900275  | 265.6147245 | 0.496493821  | 0.136507581 | 7.41E-05    | 0.000610734 |
| RNLS          | 178.3069366 | -0.496443424 | 0.166551683 | 0.000734583 | 0.004570885 |
| LINC02820     | 119.0271626 | 0.496250435  | 0.210457447 | 0.004254337 | 0.020133008 |
| INCENP        | 1227.424968 | 0.496087542  | 0.098703821 | 1.42E-07    | 2.10E-06    |
| ATP8B1-AS1    | 74.7453791  | 0.496067179  | 0.248614299 | 0.009843366 | 0.040287773 |

|              |             |              |             |             |             |
|--------------|-------------|--------------|-------------|-------------|-------------|
| POFUT2       | 644.7848431 | -0.495811008 | 0.108642395 | 1.43E-06    | 1.74E-05    |
| MARK2        | 829.9103179 | 0.495598732  | 0.111370709 | 2.39E-06    | 2.76E-05    |
| HHLA3        | 41.49732892 | -0.495576744 | 0.328633741 | 0.02314616  | 0.079765582 |
| URM1         | 1773.072706 | 0.495076629  | 0.10922529  | 1.63E-06    | 1.96E-05    |
| CPNE3        | 2094.880397 | -0.494602671 | 0.111965089 | 2.81E-06    | 3.19E-05    |
| CCDC25       | 1572.939061 | -0.494553829 | 0.084635928 | 1.46E-09    | 3.00E-08    |
| TMEM219      | 708.1243828 | -0.49447037  | 0.105634668 | 8.25E-07    | 1.06E-05    |
| LOC105378482 | 116.0083654 | -0.494469611 | 0.20904579  | 0.004314999 | 0.020343359 |
| FCER2        | 110.5882805 | 0.493869552  | 0.214360235 | 0.00493905  | 0.022850531 |
| BARD1        | 868.5322518 | 0.493861452  | 0.135025762 | 6.84E-05    | 0.000569228 |
| RPSAP54      | 2257.902248 | -0.493821043 | 0.089998036 | 1.21E-08    | 2.12E-07    |
| RPS14P3      | 100.7083393 | 0.493610078  | 0.300917362 | 0.018830072 | 0.067539428 |
| RIOK2        | 1491.624135 | -0.493521805 | 0.093185645 | 3.46E-08    | 5.66E-07    |
| PRDX6        | 7251.359985 | -0.493398966 | 0.069126554 | 2.86E-13    | 9.67E-12    |
| CHPF2        | 1286.535543 | -0.493314392 | 0.103503011 | 5.45E-07    | 7.25E-06    |
| HSDL2        | 598.3240297 | -0.493244732 | 0.138527065 | 9.99E-05    | 0.000794199 |
| ELOC         | 2305.244266 | -0.492849645 | 0.097551193 | 1.23E-07    | 1.85E-06    |
| JAK2         | 260.7876824 | 0.492781163  | 0.161332189 | 0.000578982 | 0.003710673 |
| GCSH         | 1008.984112 | -0.49250719  | 0.093687845 | 4.24E-08    | 6.88E-07    |
| ZSWIM4       | 103.0249058 | 0.492383282  | 0.20526345  | 0.00392962  | 0.01883296  |
| GDPD5        | 112.2987522 | 0.492382636  | 0.224012854 | 0.006441139 | 0.028432629 |
| SNHG12       | 113.2707976 | -0.492049041 | 0.197792947 | 0.00315453  | 0.015756272 |
| USP46        | 496.589847  | 0.491932286  | 0.137383527 | 9.21E-05    | 0.000739357 |
| RPSAP53      | 589.5274176 | -0.491605475 | 0.117649719 | 8.20E-06    | 8.43E-05    |
| ZNF32        | 153.6900465 | 0.491596901  | 0.193472209 | 0.002705847 | 0.013853796 |
| COX6C        | 7815.732175 | -0.491578741 | 0.072456876 | 3.50E-12    | 1.04E-10    |
| FBXO22       | 777.0450689 | -0.491514217 | 0.109100317 | 1.89E-06    | 2.24E-05    |
| MSC-AS1      | 143.7042186 | 0.491445034  | 0.186312328 | 0.00206726  | 0.011031972 |
| PPOX         | 508.4774291 | -0.491286533 | 0.131877034 | 5.50E-05    | 0.000468605 |
| SRGN         | 11092.01934 | -0.491148758 | 0.094547682 | 6.00E-08    | 9.42E-07    |
| OIP5-AS1     | 2725.590807 | 0.491078097  | 0.094999635 | 6.77E-08    | 1.06E-06    |
| C21orf91     | 2185.196732 | 0.490926436  | 0.281760429 | 0.016066873 | 0.059450865 |
| EEF1A1P5     | 95964.76567 | -0.49015188  | 0.06658632  | 5.48E-14    | 2.02E-12    |
| HMGCR        | 8311.02162  | -0.490066073 | 0.072099724 | 3.22E-12    | 9.63E-11    |
| LOC107984950 | 69.2544884  | 0.489885325  | 0.25472453  | 0.011668931 | 0.046029813 |
| IGKV3D-15    | 1398.397438 | -0.489571824 | 0.115784183 | 6.82E-06    | 7.13E-05    |
| IGKV3D-7     | 3186.955388 | -0.489319638 | 0.073725026 | 9.88E-12    | 2.77E-10    |
| DGKA         | 141.6892904 | 0.489214561  | 0.190270452 | 0.002531455 | 0.01309099  |
| KCNQ1OT1     | 39.78766292 | -0.489200786 | 0.376199483 | 0.030047404 | 0.097861744 |
| SLC27A4      | 655.6669855 | 0.489199587  | 0.110740521 | 2.86E-06    | 3.25E-05    |
| WSB1         | 1828.894848 | -0.489089116 | 0.079015743 | 1.80E-10    | 4.13E-09    |
| CTSS         | 7670.779436 | 0.488977937  | 0.072799429 | 5.54E-12    | 1.61E-10    |
| SNX33        | 91.77367496 | 0.488876334  | 0.233065781 | 0.008179813 | 0.034515063 |
| SHISAL2A     | 200.133227  | 0.488676879  | 0.222453489 | 0.006500517 | 0.028636341 |
| RPSA         | 43821.68586 | -0.488574803 | 0.08908609  | 1.23E-08    | 2.15E-07    |
| ZFAND2A      | 556.4878483 | -0.48840012  | 0.14683744  | 0.000241311 | 0.001726772 |
| LCMT1        | 771.8492325 | -0.48800907  | 0.097094238 | 1.48E-07    | 2.19E-06    |
| GSTA4        | 47.93060546 | 0.487960452  | 0.319420646 | 0.022943512 | 0.079288124 |
| AP1G1        | 4890.791299 | -0.487883883 | 0.068156835 | 2.58E-13    | 8.82E-12    |
| LOC107984561 | 11.54550847 | -0.487679263 | 0.683973877 | 0.029764621 | 0.097178347 |

|              |             |              |             |             |             |
|--------------|-------------|--------------|-------------|-------------|-------------|
| LOC105369957 | 12.40213898 | 0.487598521  | 0.652401982 | 0.030848229 | 0.09977564  |
| ZNF776       | 437.6408197 | 0.487536818  | 0.117364631 | 9.27E-06    | 9.39E-05    |
| MACF1        | 767.7867052 | 0.487239357  | 0.149644214 | 0.000300419 | 0.002087625 |
| SLC31A1P1    | 32.51725488 | -0.487070611 | 0.369994979 | 0.03025985  | 0.098276411 |
| ALDH1L2      | 2894.940067 | -0.486944229 | 0.079028487 | 2.16E-10    | 4.90E-09    |
| EMC9         | 301.0651465 | 0.486831179  | 0.155478126 | 0.000469524 | 0.003089192 |
| CASK         | 480.9733678 | 0.486617361  | 0.111124507 | 3.40E-06    | 3.79E-05    |
| RSPRY1       | 774.1330413 | -0.486530301 | 0.110471915 | 3.06E-06    | 3.45E-05    |
| NQO1         | 3837.299544 | -0.486296264 | 0.076041198 | 4.91E-11    | 1.22E-09    |
| ACSF3        | 1037.998409 | -0.486141789 | 0.103787731 | 8.39E-07    | 1.08E-05    |
| MED22        | 581.0414364 | 0.486024648  | 0.115282433 | 7.23E-06    | 7.51E-05    |
| TRBC2        | 1667.349371 | 0.485940341  | 0.095374524 | 1.03E-07    | 1.56E-06    |
| USP20        | 379.7844269 | 0.48575781   | 0.123362498 | 2.33E-05    | 0.000217938 |
| USP12        | 1244.629981 | -0.485749489 | 0.098914658 | 2.65E-07    | 3.75E-06    |
| STAG3L4      | 252.812229  | 0.485667989  | 0.142837654 | 0.000185887 | 0.00136979  |
| SGPL1        | 653.7203842 | 0.485609238  | 0.102658065 | 6.61E-07    | 8.66E-06    |
| EIF4E3       | 550.3624569 | 0.485175592  | 0.131900981 | 6.50E-05    | 0.000543791 |
| SNORD141A    | 1149.879122 | -0.485097994 | 0.097136818 | 1.79E-07    | 2.60E-06    |
| PAXX         | 506.4979006 | 0.48504401   | 0.140583946 | 0.000156025 | 0.0011732   |
| ZNF416       | 149.044969  | 0.484998247  | 0.180348292 | 0.001802332 | 0.009833328 |
| DYNC2I2      | 966.0504433 | 0.484786843  | 0.100487227 | 4.14E-07    | 5.62E-06    |
| RGS1         | 6201.915724 | -0.484451017 | 0.09690587  | 1.85E-07    | 2.68E-06    |
| ZNF490       | 261.0343197 | 0.484384246  | 0.148192238 | 0.000292602 | 0.002038208 |
| TRPV3        | 17.59568876 | -0.484375519 | 0.631132537 | 0.030804805 | 0.099709684 |
| MSMO1        | 3971.662429 | -0.48431618  | 0.095323834 | 1.12E-07    | 1.69E-06    |
| BTN2A2       | 1168.83122  | 0.484108819  | 0.084643816 | 3.19E-09    | 6.20E-08    |
| PIK3R5       | 12.03115034 | 0.484048079  | 0.732859113 | 0.02606395  | 0.087657684 |
| TGFBR3       | 64.30139134 | 0.483976798  | 0.283794954 | 0.017783927 | 0.064603371 |
| DPM2         | 742.9102902 | 0.483873821  | 0.126629155 | 3.80E-05    | 0.000336042 |
| MARCHF2      | 203.368915  | 0.483820904  | 0.181213985 | 0.001969195 | 0.010600107 |
| PRRC2B       | 2657.820232 | 0.483779704  | 0.101639249 | 5.66E-07    | 7.49E-06    |
| ABCC4        | 1745.725234 | -0.483778467 | 0.081697377 | 9.71E-10    | 2.04E-08    |
| SHKBP1       | 2012.312807 | 0.483678947  | 0.114464526 | 6.93E-06    | 7.23E-05    |
| IGKV3-15     | 1452.642019 | -0.483627642 | 0.115526179 | 8.32E-06    | 8.53E-05    |
| TRIM36       | 145.3409897 | 0.48355702   | 0.195214524 | 0.003308095 | 0.016381552 |
| SPTAN1       | 3158.707996 | 0.483415447  | 0.08704188  | 8.26E-09    | 1.49E-07    |
| CDC42EP3     | 534.6937866 | 0.483400412  | 0.114378219 | 6.85E-06    | 7.15E-05    |
| DMKN         | 82.08092725 | -0.483088957 | 0.245288167 | 0.011203251 | 0.044671127 |
| LPGAT1       | 1269.767772 | 0.4829911    | 0.106458927 | 1.65E-06    | 1.99E-05    |
| SLC30A1      | 3038.802326 | -0.482975236 | 0.149810434 | 0.000349472 | 0.002379788 |
| FMR1         | 614.7995928 | 0.482793548  | 0.179355361 | 0.001927032 | 0.010402249 |
| MAGEA10      | 1797.490151 | -0.482491151 | 0.084790616 | 3.84E-09    | 7.36E-08    |
| BRD7P2       | 139.2369521 | -0.482070681 | 0.183594479 | 0.002229502 | 0.011774409 |
| CFLAR        | 1357.894512 | 0.481990292  | 0.083983954 | 2.86E-09    | 5.60E-08    |
| ZNF263       | 1089.406775 | -0.481969874 | 0.097664206 | 2.41E-07    | 3.43E-06    |
| ABHD18       | 300.9323774 | -0.481820189 | 0.132036134 | 7.59E-05    | 0.000623823 |
| PMM2         | 1836.22363  | -0.481574689 | 0.081570966 | 1.10E-09    | 2.29E-08    |
| LILRA2       | 982.1661721 | 0.481559585  | 0.100948328 | 5.49E-07    | 7.30E-06    |
| WASL-DT      | 41.93866732 | -0.4813742   | 0.326447539 | 0.026043606 | 0.087608387 |
| ATP1A3       | 2664.550845 | -0.481301568 | 0.081370018 | 1.03E-09    | 2.15E-08    |

|                    |             |              |             |             |             |
|--------------------|-------------|--------------|-------------|-------------|-------------|
| APOBEC3A           | 266.1945396 | 0.480867919  | 0.139798957 | 0.000163311 | 0.001221626 |
| GTF3C5             | 1930.838582 | 0.480819976  | 0.093282285 | 7.65E-08    | 1.18E-06    |
| RNF139             | 1837.036979 | -0.480768795 | 0.092112532 | 5.42E-08    | 8.60E-07    |
| DIPK1A             | 1245.266799 | 0.480763828  | 0.108304916 | 2.65E-06    | 3.03E-05    |
| LSR                | 2367.849932 | 0.480713332  | 0.103675183 | 1.05E-06    | 1.31E-05    |
| LINC01234          | 112.0227298 | 0.480663717  | 0.212429537 | 0.005778094 | 0.025962441 |
| TANGO2             | 581.626052  | 0.480615594  | 0.116614476 | 1.10E-05    | 0.000110685 |
| ZMYND8             | 480.0958542 | 0.480430221  | 0.117860138 | 1.31E-05    | 0.000129485 |
| AHNAK              | 8447.41327  | 0.480359871  | 0.105077496 | 1.40E-06    | 1.70E-05    |
| LAMTOR3            | 1398.256949 | -0.480355397 | 0.109467245 | 3.34E-06    | 3.73E-05    |
| GNPTAB             | 1052.453084 | -0.480107016 | 0.091845887 | 5.18E-08    | 8.27E-07    |
| ZBED1              | 723.874828  | 0.480064656  | 0.108769764 | 3.06E-06    | 3.45E-05    |
| TENT4B             | 603.0740348 | -0.47982699  | 0.162035051 | 0.000829437 | 0.005064875 |
| GATB               | 691.0564171 | -0.479658242 | 0.103827505 | 1.16E-06    | 1.44E-05    |
| GDF11              | 855.637106  | 0.479632363  | 0.090921534 | 3.98E-08    | 6.50E-07    |
| RPSAP55            | 126.4270152 | -0.479503969 | 0.22051454  | 0.007250117 | 0.031375135 |
| POLR3D             | 1019.494901 | -0.479391317 | 0.10581367  | 1.77E-06    | 2.12E-05    |
| DNAJC14            | 1416.539692 | 0.479295     | 0.079525503 | 5.10E-10    | 1.12E-08    |
| CLYBL              | 415.3007913 | -0.479213505 | 0.12116875  | 2.23E-05    | 0.000209173 |
| SNORD141B          | 1153.381783 | -0.479016966 | 0.097659686 | 2.87E-07    | 4.04E-06    |
| SP100              | 1055.475699 | 0.478761663  | 0.089691203 | 2.84E-08    | 4.71E-07    |
| SMURF2P1-LRRC37BP1 | 201.0794266 | 0.47867695   | 0.152905489 | 0.000483442 | 0.003165126 |
| KDELR1             | 6149.341142 | -0.478367759 | 0.078348946 | 3.25E-10    | 7.26E-09    |
| SS18L2             | 783.0657582 | -0.478367464 | 0.102207397 | 8.77E-07    | 1.12E-05    |
| ADAM15             | 2392.432411 | -0.478197884 | 0.103649479 | 1.20E-06    | 1.48E-05    |
| ZFP69              | 144.3389642 | 0.477903563  | 0.178761206 | 0.001984333 | 0.01066502  |
| XPO6               | 1959.896431 | -0.477621067 | 0.106105023 | 2.04E-06    | 2.41E-05    |
| HSPA8P1            | 184.9494264 | -0.477529738 | 0.203609688 | 0.004820936 | 0.022405838 |
| IGHA2              | 24749.5514  | -0.477509167 | 0.0855875   | 7.55E-09    | 1.37E-07    |
| HEXIM1             | 1832.727642 | -0.477313461 | 0.086819203 | 1.20E-08    | 2.11E-07    |
| SQOR               | 585.4277444 | 0.477265285  | 0.10941948  | 3.87E-06    | 4.26E-05    |
| STXBP6             | 238.8701656 | -0.477128738 | 0.172112324 | 0.001479633 | 0.008303083 |
| MFSD8              | 388.9064488 | -0.476979064 | 0.132755183 | 9.37E-05    | 0.000751393 |
| GPATCH11           | 1199.250717 | 0.476895573  | 0.091333661 | 5.36E-08    | 8.51E-07    |
| WRN                | 987.1394921 | -0.476868852 | 0.095607614 | 1.85E-07    | 2.69E-06    |
| KCNA2              | 160.9684387 | -0.476694107 | 0.169618222 | 0.001343127 | 0.007622012 |
| MIR6797            | 234.6160808 | -0.476688577 | 0.149229646 | 0.000398995 | 0.002677024 |
| RGPD2              | 313.9233281 | 0.476640542  | 0.128339135 | 5.92E-05    | 0.000500016 |
| RPS2P46            | 13166.37468 | -0.476584674 | 0.072021954 | 1.15E-11    | 3.20E-10    |
| TRIM21             | 347.7401876 | 0.47657056   | 0.123881805 | 3.47E-05    | 0.000310574 |
| POLH               | 227.3023303 | -0.476434292 | 0.170787791 | 0.001425502 | 0.008046097 |
| EEF2K              | 539.205437  | -0.476411486 | 0.107716326 | 2.94E-06    | 3.32E-05    |
| RPS15AP12          | 776.6304052 | -0.476368958 | 0.108526454 | 3.37E-06    | 3.77E-05    |
| ILDR2              | 87.7960504  | -0.47623891  | 0.225997203 | 0.008531303 | 0.035702411 |
| SAPCD2             | 816.9637493 | 0.476193585  | 0.134213693 | 0.000111331 | 0.000873155 |
| TRAFD1             | 788.5715838 | 0.476083584  | 0.10530234  | 1.84E-06    | 2.20E-05    |
| ALDOC              | 7455.789767 | 0.476040237  | 0.073047981 | 2.24E-11    | 5.91E-10    |
| LINC01963          | 267.6255925 | -0.476010015 | 0.147190676 | 0.000343909 | 0.002347446 |
| HSD17B7            | 1319.395695 | -0.476001966 | 0.093002008 | 9.60E-08    | 1.46E-06    |
| METTL8             | 576.4352679 | -0.475869658 | 0.114014159 | 8.95E-06    | 9.09E-05    |

|              |             |              |             |             |             |
|--------------|-------------|--------------|-------------|-------------|-------------|
| MEF2C-AS1    | 64.90749162 | -0.47586096  | 0.264486062 | 0.015943888 | 0.059122122 |
| SINHCAF      | 1865.381766 | 0.475823187  | 0.091398275 | 5.85E-08    | 9.19E-07    |
| LTA4H        | 3011.910678 | -0.475733047 | 0.076485435 | 1.57E-10    | 3.62E-09    |
| RPL10AP2     | 193.702969  | -0.475671837 | 0.253281762 | 0.013736469 | 0.05269704  |
| TMX4         | 3557.71642  | 0.475550612  | 0.084198942 | 5.00E-09    | 9.34E-08    |
| TNFRSF13B    | 204.6806278 | -0.47528539  | 0.153809827 | 0.000564203 | 0.003625342 |
| PDPR2P       | 107.585416  | -0.47525554  | 0.2115939   | 0.006207258 | 0.027575957 |
| SRGAP2C      | 134.775311  | 0.47520386   | 0.197729547 | 0.004135372 | 0.019652094 |
| RASSF1       | 309.8670811 | -0.475159334 | 0.13417249  | 0.000116739 | 0.000910208 |
| GPC6         | 1037.105419 | -0.475095712 | 0.102415661 | 1.07E-06    | 1.33E-05    |
| AK6          | 1286.880802 | -0.474883703 | 0.097279264 | 3.22E-07    | 4.48E-06    |
| EEF1A1P19    | 13193.56152 | -0.474653804 | 0.088884059 | 2.86E-08    | 4.75E-07    |
| COX1         | 154338.5723 | -0.474528143 | 0.078635186 | 5.05E-10    | 1.11E-08    |
| ANKRD17      | 1664.3001   | -0.474396551 | 0.094346229 | 1.46E-07    | 2.16E-06    |
| SNTA1        | 417.2793688 | -0.474381597 | 0.132982847 | 0.000106586 | 0.000842043 |
| TSTD1        | 1206.901481 | -0.47385841  | 0.117547274 | 1.66E-05    | 0.000161008 |
| RPL29        | 26185.84166 | -0.473700167 | 0.082469318 | 2.51E-09    | 4.97E-08    |
| DIS3         | 2922.431867 | -0.473036585 | 0.084545207 | 6.88E-09    | 1.26E-07    |
| RPS7         | 100731.9685 | -0.47280872  | 0.071366327 | 2.09E-11    | 5.55E-10    |
| RRN3         | 1903.530555 | -0.472698375 | 0.100600934 | 8.01E-07    | 1.03E-05    |
| C2orf68      | 1163.403278 | 0.472130855  | 0.085870661 | 1.18E-08    | 2.08E-07    |
| USP38        | 2287.110519 | -0.471955754 | 0.085251306 | 9.68E-09    | 1.74E-07    |
| KIFAP3       | 1130.671653 | -0.471949755 | 0.088117696 | 2.69E-08    | 4.48E-07    |
| TTC30B       | 129.6238183 | 0.47187354   | 0.186788653 | 0.003057627 | 0.015329743 |
| CHEK2        | 123.9424931 | 0.471742514  | 0.19868966  | 0.004531564 | 0.021220414 |
| C16orf91     | 296.7854635 | -0.471595891 | 0.154300265 | 0.000643992 | 0.004070075 |
| IGHJ5        | 101.8589471 | -0.471027687 | 0.212205099 | 0.006688231 | 0.029336396 |
| WDR81        | 753.1409059 | 0.471012315  | 0.12614855  | 5.59E-05    | 0.000476322 |
| GOLGA8M      | 43.08600674 | 0.470638542  | 0.321418779 | 0.026915491 | 0.08991041  |
| RPS7P11      | 10944.13477 | -0.470598311 | 0.076015776 | 1.91E-10    | 4.38E-09    |
| ND2          | 43309.73066 | -0.470586129 | 0.073573121 | 5.06E-11    | 1.26E-09    |
| ABCA3        | 196.1402906 | -0.470130353 | 0.17193416  | 0.001739271 | 0.009552474 |
| RACGAP1      | 3260.495299 | 0.470076335  | 0.070746254 | 9.65E-12    | 2.71E-10    |
| GALE         | 310.4313368 | -0.469975952 | 0.138980649 | 0.00021353  | 0.001545861 |
| METTL9       | 2318.932705 | -0.469970877 | 0.080280169 | 1.53E-09    | 3.12E-08    |
| PDXP         | 1334.614631 | 0.469707858  | 0.129281427 | 8.27E-05    | 0.000672166 |
| MSR1         | 796.0379718 | -0.469475276 | 0.130808512 | 9.82E-05    | 0.000783675 |
| EEF1A1P13    | 24209.3897  | -0.469474618 | 0.085622751 | 1.34E-08    | 2.32E-07    |
| BACH1        | 2108.672738 | -0.469331608 | 0.122094587 | 3.65E-05    | 0.000324906 |
| ATP6V1C1     | 2133.101077 | -0.469218822 | 0.092596131 | 1.26E-07    | 1.90E-06    |
| LOC124900868 | 362.8538185 | -0.469183199 | 0.1226385   | 3.94E-05    | 0.00034724  |
| SLC9B2       | 1167.877976 | -0.469159939 | 0.088698678 | 3.87E-08    | 6.31E-07    |
| B3GNT2       | 957.8424836 | 0.468981216  | 0.137448214 | 0.000186903 | 0.00137669  |
| POGLUT2      | 462.8635293 | -0.468926223 | 0.109067222 | 5.31E-06    | 5.68E-05    |
| LGR4         | 355.2007344 | -0.468749419 | 0.152538412 | 0.000602593 | 0.0038435   |
| TRIM68       | 307.0835942 | 0.468738998  | 0.130920064 | 0.000100878 | 0.000801703 |
| MEF2A        | 1438.327863 | 0.468407018  | 0.107794874 | 4.24E-06    | 4.64E-05    |
| H1-10        | 3417.465694 | -0.468116007 | 0.144292231 | 0.000349833 | 0.002381315 |
| WASHC5       | 1732.748306 | -0.468082819 | 0.080533877 | 1.97E-09    | 3.97E-08    |
| RPSAP58      | 9599.633556 | -0.468003243 | 0.078477096 | 7.98E-10    | 1.70E-08    |



|              |             |              |             |             |             |
|--------------|-------------|--------------|-------------|-------------|-------------|
| TPX2         | 3003.47375  | 0.467952944  | 0.07878972  | 9.02E-10    | 1.90E-08    |
| RGL1         | 46.99072063 | 0.467932384  | 0.317392498 | 0.027187487 | 0.090569059 |
| RPL29P4      | 3129.659855 | -0.467827126 | 0.073667052 | 6.98E-11    | 1.71E-09    |
| CKB          | 803.9566637 | 0.4672718    | 0.133554483 | 0.000138604 | 0.001057822 |
| PDXDC1       | 2164.63542  | -0.4671933   | 0.072435979 | 3.65E-11    | 9.33E-10    |
| CENPI        | 203.6830346 | 0.467002156  | 0.164383283 | 0.001257423 | 0.007198012 |
| BAIAP2-DT    | 104.7995584 | 0.466684447  | 0.219596929 | 0.008401026 | 0.035281782 |
| SEMA3G       | 148.4607003 | -0.466200508 | 0.176190092 | 0.002263502 | 0.011928503 |
| C2CD2        | 10.08084718 | 0.465935506  | 0.711475671 | 0.027648778 | 0.091793308 |
| CD99         | 451.6054996 | -0.465906707 | 0.123301998 | 4.85E-05    | 0.000417427 |
| VIM-AS1      | 92.74264665 | 0.465826048  | 0.23012812  | 0.010547843 | 0.042606171 |
| LOC124906110 | 101.1802278 | -0.465820586 | 0.220826441 | 0.00878795  | 0.036608355 |
| HSPA8        | 149889.135  | -0.465627111 | 0.067182151 | 1.88E-12    | 5.82E-11    |
| KBTBD7       | 628.1242601 | 0.465557492  | 0.123357837 | 4.83E-05    | 0.000416336 |
| MANEAL       | 418.3966507 | 0.465394659  | 0.116834119 | 2.08E-05    | 0.000196039 |
| TMEM102      | 225.6863216 | 0.465111942  | 0.161909226 | 0.001161719 | 0.006756614 |
| AFTPH-DT     | 175.6099068 | -0.464875463 | 0.161552329 | 0.0011525   | 0.006713034 |
| DDX59        | 331.5848379 | 0.464789383  | 0.12592635  | 6.71E-05    | 0.000560035 |
| BMI1         | 2713.672019 | 0.464789169  | 0.139060971 | 0.00027347  | 0.00192039  |
| ATP6V1B2     | 3072.603548 | -0.464631198 | 0.073379734 | 7.98E-11    | 1.93E-09    |
| CCDC15       | 55.75084994 | 0.464602618  | 0.279664247 | 0.020901338 | 0.073566764 |
| UPF3AP2      | 68.72881423 | -0.464339553 | 0.254964235 | 0.016078371 | 0.059480698 |
| RRN3P2       | 214.4612773 | -0.464135799 | 0.155627959 | 0.000838491 | 0.005107331 |
| RAB11FIP2    | 156.6902874 | 0.464063078  | 0.189288349 | 0.00379139  | 0.018252851 |
| NAIF1        | 514.8464912 | 0.463872754  | 0.107783715 | 5.25E-06    | 5.62E-05    |
| FRMD8        | 1286.631258 | -0.463813914 | 0.099101062 | 9.16E-07    | 1.17E-05    |
| SERTAD2      | 868.8048988 | 0.463784309  | 0.104359009 | 2.73E-06    | 3.11E-05    |
| RASAL3       | 916.03576   | 0.46373838   | 0.10717788  | 4.69E-06    | 5.09E-05    |
| GIT2         | 616.6192782 | 0.463346889  | 0.100447138 | 1.25E-06    | 1.54E-05    |
| AGFG2        | 195.2256255 | 0.463205232  | 0.167507139 | 0.001616473 | 0.008974821 |
| SNHG32       | 4439.727017 | 0.463103969  | 0.073082087 | 7.73E-11    | 1.88E-09    |
| BOLA1        | 75.89942094 | -0.462893596 | 0.270287015 | 0.019686813 | 0.069989024 |
| SETSIP       | 67.82127472 | 0.462839227  | 0.256824235 | 0.01660844  | 0.060946885 |
| MKI67        | 525.3963156 | 0.462703474  | 0.1743576   | 0.002180736 | 0.011562709 |
| RNF168       | 517.7518938 | 0.462677084  | 0.128722731 | 9.72E-05    | 0.000775785 |
| ARHGAP11B    | 172.0086662 | 0.462600634  | 0.169275503 | 0.001759988 | 0.009638847 |
| HGSNAT       | 442.3364016 | -0.462548408 | 0.114748835 | 1.75E-05    | 0.00016821  |
| FAM53B       | 300.4926418 | 0.462289448  | 0.148500944 | 0.000544825 | 0.003508642 |
| CALM3        | 6408.410253 | 0.462035245  | 0.067343232 | 2.29E-12    | 6.96E-11    |
| SEC14L1      | 3267.007492 | 0.461875662  | 0.073462527 | 1.05E-10    | 2.50E-09    |
| FASN         | 6525.304382 | -0.461763115 | 0.094562021 | 3.36E-07    | 4.66E-06    |
| PPP2CB       | 1210.944166 | -0.461619911 | 0.089903521 | 9.09E-08    | 1.39E-06    |
| IQCB1        | 369.8180539 | -0.461398133 | 0.129552937 | 0.000113242 | 0.00088613  |
| ZNF180       | 285.3430256 | 0.461260029  | 0.139649583 | 0.000283009 | 0.001977753 |
| TGS1         | 1135.457829 | -0.461083195 | 0.08953127  | 8.36E-08    | 1.28E-06    |
| TRBC1        | 186.3654331 | 0.460959588  | 0.162626867 | 0.001325613 | 0.007536322 |
| ADH5P4       | 85.50467024 | -0.460724255 | 0.233174555 | 0.012025321 | 0.047124344 |
| MIS18BP1     | 705.9191863 | 0.459820306  | 0.108024832 | 6.47E-06    | 6.77E-05    |
| MRM1         | 204.0243776 | 0.459722844  | 0.153376439 | 0.000800165 | 0.004913635 |
| MTHFR        | 389.1773314 | -0.459570652 | 0.134847644 | 0.000201124 | 0.001468944 |

|               |             |              |             |             |             |
|---------------|-------------|--------------|-------------|-------------|-------------|
| ARGLU1        | 1457.723037 | -0.459545299 | 0.087634808 | 5.04E-08    | 8.06E-07    |
| ATP23         | 363.9944289 | 0.459510425  | 0.130306535 | 0.00012757  | 0.000984025 |
| PIGS          | 2504.29088  | 0.459256205  | 0.081124093 | 4.93E-09    | 9.24E-08    |
| LPXN          | 1313.235301 | 0.459171532  | 0.088620232 | 7.17E-08    | 1.11E-06    |
| KNSTRN        | 858.6637014 | 0.459096228  | 0.094357915 | 3.67E-07    | 5.05E-06    |
| HPCAL4        | 295.9265827 | 0.459045586  | 0.142288506 | 0.000375861 | 0.002540512 |
| NSA2P7        | 284.8629084 | -0.458340387 | 0.14476011  | 0.000465593 | 0.003070325 |
| SLC20A1       | 2542.837175 | -0.458299892 | 0.081805629 | 7.03E-09    | 1.28E-07    |
| CDCA3         | 539.5276942 | 0.45804833   | 0.107222111 | 6.18E-06    | 6.52E-05    |
| LPCAT1        | 3517.45921  | -0.45797264  | 0.081011677 | 4.96E-09    | 9.28E-08    |
| LOC124900276  | 171.5950313 | 0.457945465  | 0.173258184 | 0.002338383 | 0.012255987 |
| TOP2A         | 9339.931362 | 0.4578937    | 0.082334374 | 8.71E-09    | 1.57E-07    |
| VAMP1         | 49.40946689 | -0.457882118 | 0.317117828 | 0.029786777 | 0.097232349 |
| PGM2L1        | 89.62171311 | 0.457822521  | 0.224694613 | 0.01052823  | 0.042548232 |
| ANKRD10       | 1223.161724 | -0.457739608 | 0.092194336 | 2.25E-07    | 3.22E-06    |
| C1QTNF3-AMACR | 167.0825024 | -0.457620718 | 0.174502511 | 0.002510122 | 0.013014305 |
| INTS10        | 1652.826259 | -0.45742714  | 0.084642467 | 2.17E-08    | 3.66E-07    |
| SLC17A5       | 324.3742789 | -0.457205972 | 0.131766939 | 0.000162397 | 0.001215777 |
| ALDH3B1       | 538.7849368 | -0.457070265 | 0.125344313 | 8.38E-05    | 0.000679676 |
| DPH7          | 399.5673992 | 0.45704668   | 0.122343954 | 5.81E-05    | 0.00049136  |
| ANKRD46       | 485.0174542 | -0.4568382   | 0.178104839 | 0.002902101 | 0.014677475 |
| TMBIM4        | 1984.036344 | 0.456629784  | 0.09006755  | 1.30E-07    | 1.94E-06    |
| GFI1          | 258.0806691 | -0.456559122 | 0.152530452 | 0.000833681 | 0.005085191 |
| NUMBL         | 115.9195438 | -0.456535262 | 0.205311152 | 0.007028224 | 0.030556806 |
| LOC124905322  | 46.08011282 | -0.455989228 | 0.29888463  | 0.027201575 | 0.090569059 |
| LGALS3        | 10885.34447 | -0.455597257 | 0.082334504 | 1.05E-08    | 1.87E-07    |
| UBE2H         | 5344.379038 | -0.455251968 | 0.070063129 | 2.75E-11    | 7.18E-10    |
| EEF1A1        | 301640.1382 | -0.455196725 | 0.062768573 | 1.54E-13    | 5.39E-12    |
| PPFIA3        | 310.6196662 | -0.455196505 | 0.139655367 | 0.000343114 | 0.002343871 |
| GSTP1         | 15705.65338 | 0.45506692   | 0.085924648 | 3.74E-08    | 6.12E-07    |
| PRUNE1        | 3486.565202 | 0.4550366    | 0.077455149 | 1.41E-09    | 2.90E-08    |
| BRMS1L        | 195.41333   | 0.454979153  | 0.179754581 | 0.003209042 | 0.015991648 |
| MRPL13        | 1891.683236 | -0.454945732 | 0.078389355 | 2.20E-09    | 4.41E-08    |
| RGS14         | 595.4046694 | 0.454942314  | 0.121183694 | 5.46E-05    | 0.000465863 |
| STN1          | 356.1938536 | 0.45492312   | 0.129109266 | 0.000132997 | 0.001019979 |
| S100A11       | 3566.139132 | -0.454900066 | 0.083537934 | 1.74E-08    | 2.98E-07    |
| XRCC3         | 316.8794732 | 0.453999962  | 0.137961957 | 0.000306409 | 0.002124136 |
| CUX2          | 382.1855328 | 0.453883445  | 0.130630285 | 0.000158464 | 0.001189477 |
| BIK           | 1016.625622 | -0.453852752 | 0.117099634 | 3.45E-05    | 0.000309442 |
| BBS2          | 278.7340683 | -0.453821888 | 0.14498431  | 0.000537254 | 0.003468915 |
| RIOX2         | 2180.411264 | 0.453646629  | 0.081849317 | 9.82E-09    | 1.76E-07    |
| SMYD4         | 208.1103669 | 0.453529311  | 0.155957015 | 0.001081578 | 0.006355511 |
| SHB           | 115.446542  | -0.453474678 | 0.194372137 | 0.005477879 | 0.02485277  |
| EFNA3         | 217.8793308 | -0.453219101 | 0.147812143 | 0.000665368 | 0.004183798 |
| MYO5B         | 150.4785023 | -0.45319932  | 0.180505283 | 0.003441843 | 0.016918082 |
| FBN1          | 83.99630297 | -0.452892532 | 0.248565211 | 0.016650332 | 0.06107473  |
| EHMT1         | 663.7913778 | 0.452605443  | 0.11040459  | 1.33E-05    | 0.000130668 |
| PDPR          | 1745.926827 | -0.452591338 | 0.079708899 | 4.65E-09    | 8.83E-08    |
| CWH43         | 6.059038035 | 0.45113481   | 0.991862121 | 0.010909745 | 0.043702073 |
| NRM           | 232.8641644 | 0.45103777   | 0.165382387 | 0.001891189 | 0.010256425 |

|           |             |              |             |             |             |
|-----------|-------------|--------------|-------------|-------------|-------------|
| TOR1A     | 1589.528503 | 0.450973624  | 0.079872897 | 5.53E-09    | 1.03E-07    |
| SHISA5    | 1239.133026 | -0.450907014 | 0.097026567 | 1.13E-06    | 1.40E-05    |
| STK32C    | 121.2808965 | -0.450418236 | 0.210200079 | 0.008667698 | 0.036168319 |
| TAF9      | 2649.592623 | -0.450143515 | 0.074378031 | 4.90E-10    | 1.08E-08    |
| DDX1      | 15051.55555 | -0.450141583 | 0.066599248 | 4.82E-12    | 1.41E-10    |
| UAP1L1    | 973.8290418 | 0.450121349  | 0.118326386 | 4.58E-05    | 0.000397074 |
| GMPPB     | 537.7133461 | -0.450093882 | 0.125280539 | 0.000105159 | 0.000831905 |
| ZNF709    | 89.6221067  | 0.449920215  | 0.217887958 | 0.010285777 | 0.041753118 |
| LAMTOR4   | 1118.792453 | -0.449821845 | 0.123188569 | 8.45E-05    | 0.000683693 |
| FBXW5     | 1138.66441  | 0.449767942  | 0.1039152   | 4.94E-06    | 5.32E-05    |
| SNORD10   | 21.39604713 | 0.449725561  | 0.801349266 | 0.018925287 | 0.067768949 |
| CPNE2     | 142.6653786 | -0.449591238 | 0.185548657 | 0.00441502  | 0.020750861 |
| CD55      | 1900.256881 | -0.449406643 | 0.088799062 | 1.42E-07    | 2.10E-06    |
| ARHGAP12  | 459.4580784 | 0.449025794  | 0.143424797 | 0.000532897 | 0.003444591 |
| WDSUB1    | 109.6805268 | 0.448723939  | 0.213872268 | 0.009579949 | 0.039367816 |
| UNC93B1   | 1806.957675 | 0.448721316  | 0.126925273 | 0.00013376  | 0.001024466 |
| FPGT      | 180.6458798 | 0.448712646  | 0.193644289 | 0.00570171  | 0.025670207 |
| TXN       | 11476.44415 | -0.448526123 | 0.067521629 | 1.07E-11    | 3.01E-10    |
| CC2D2A    | 6.111268277 | -0.448469866 | 0.998634773 | 0.010069047 | 0.04101961  |
| ABHD14A   | 513.6516534 | -0.448142775 | 0.121492424 | 7.38E-05    | 0.000608491 |
| ARIH2     | 2638.130057 | -0.448001318 | 0.073890241 | 4.64E-10    | 1.03E-08    |
| TBKBP1    | 73.07732038 | -0.447750376 | 0.245028771 | 0.017119974 | 0.062598519 |
| SPAG6     | 319.6279644 | 0.447453595  | 0.130474482 | 0.000192487 | 0.001413009 |
| TMSB4XP1  | 1590.718576 | 0.447345604  | 0.096215948 | 1.11E-06    | 1.38E-05    |
| ELOVL7    | 407.3547959 | 0.447319649  | 0.151671533 | 0.000962486 | 0.005757297 |
| NLN       | 1283.008709 | -0.447120063 | 0.085470492 | 5.77E-08    | 9.09E-07    |
| NAXD      | 265.1905376 | -0.447116037 | 0.155671165 | 0.001264401 | 0.007233444 |
| KCNA3     | 1982.618519 | 0.446921981  | 0.11585989  | 3.68E-05    | 0.00032705  |
| SLC2A13   | 235.7347399 | 0.446905974  | 0.172266332 | 0.002759722 | 0.014084911 |
| ZNF714    | 362.6842441 | 0.446765847  | 0.154298536 | 0.001144126 | 0.006671182 |
| WDTC1     | 1218.120821 | 0.446356681  | 0.090607236 | 2.83E-07    | 3.98E-06    |
| TBC1D13   | 686.7508108 | 0.446134272  | 0.107000872 | 1.02E-05    | 0.0001028   |
| UBE2Q2    | 1348.687108 | 0.446100658  | 0.126186248 | 0.000129558 | 0.000998023 |
| S100A5    | 700.5655752 | -0.445993287 | 0.147683634 | 0.000795089 | 0.004888372 |
| EEF1A1P22 | 77.11753163 | -0.445926855 | 0.241483211 | 0.016616343 | 0.060962967 |
| GLYR1     | 1298.950476 | -0.445896691 | 0.0851048   | 5.63E-08    | 8.91E-07    |
| FAM53C    | 3241.350148 | -0.445787801 | 0.089822213 | 2.38E-07    | 3.39E-06    |
| DARS2     | 4464.077625 | -0.445761136 | 0.076978581 | 2.43E-09    | 4.83E-08    |
| PLAGL1    | 147.095834  | 0.445582899  | 0.182385142 | 0.004253609 | 0.020133008 |
| GNL3      | 3156.268103 | -0.445396715 | 0.069477219 | 5.07E-11    | 1.26E-09    |
| EIF1B     | 927.5158208 | -0.445386502 | 0.09212772  | 4.54E-07    | 6.12E-06    |
| RPUSD3    | 505.9882731 | -0.445170189 | 0.130903958 | 0.000218947 | 0.001580276 |
| TMEM185B  | 938.9481603 | 0.445060807  | 0.0916937   | 4.06E-07    | 5.52E-06    |
| STX11     | 658.1132334 | -0.444802272 | 0.112799354 | 2.68E-05    | 0.000246954 |
| EFNA4     | 601.061756  | -0.444654923 | 0.111970405 | 2.41E-05    | 0.000224442 |
| ASTN2     | 151.4850311 | -0.444572259 | 0.174602326 | 0.003255299 | 0.016175611 |
| LRP8      | 793.7056163 | 0.444494952  | 0.097579364 | 1.76E-06    | 2.11E-05    |
| BORCS5    | 523.5342737 | -0.44436013  | 0.122375943 | 9.35E-05    | 0.000750169 |
| EEF1A1P11 | 18993.51215 | -0.444233784 | 0.068815718 | 4.55E-11    | 1.14E-09    |
| ACVR1     | 107.5427537 | 0.44421746   | 0.231839175 | 0.014417456 | 0.054651753 |

|              |             |              |             |             |             |
|--------------|-------------|--------------|-------------|-------------|-------------|
| BTLA         | 9.512340089 | 0.44408351   | 0.682331512 | 0.029281023 | 0.096033991 |
| ZNF431       | 235.6564581 | 0.44398176   | 0.191151027 | 0.005718155 | 0.025726496 |
| PPT2         | 488.6900615 | -0.443955297 | 0.112844257 | 2.80E-05    | 0.000256384 |
| PRF1         | 5.72067429  | 0.443684392  | 0.935639837 | 0.012375168 | 0.048298578 |
| RABGGTB      | 1822.043054 | -0.443683537 | 0.09147954  | 4.24E-07    | 5.73E-06    |
| SCARB1       | 1815.888847 | -0.44337865  | 0.099264215 | 2.72E-06    | 3.10E-05    |
| ZNF678       | 282.7988086 | 0.443309686  | 0.138165798 | 0.000422181 | 0.002815134 |
| CARD16       | 170.7599431 | 0.44314445   | 0.16759851  | 0.002474501 | 0.012856565 |
| ZFP37        | 123.1474632 | 0.443061445  | 0.201445686 | 0.007794458 | 0.033256085 |
| TTF1         | 554.9792625 | 0.443012545  | 0.106864039 | 1.12E-05    | 0.000112707 |
| GALNT9       | 63.39834664 | 0.442949641  | 0.273076306 | 0.024727942 | 0.084144975 |
| ADAM23       | 1106.478162 | -0.442942923 | 0.087443004 | 1.41E-07    | 2.09E-06    |
| SLC39A13     | 174.840631  | -0.442551372 | 0.189884132 | 0.005815214 | 0.026082339 |
| TOM1         | 443.9894795 | 0.442521197  | 0.142547157 | 0.000605253 | 0.003857622 |
| TRNG         | 165.6437943 | 0.442487878  | 0.244702706 | 0.017780106 | 0.064603041 |
| CLK4         | 198.053736  | -0.442344548 | 0.161532572 | 0.001892889 | 0.010256425 |
| RPS2         | 58652.33887 | -0.442248014 | 0.092897593 | 4.20E-07    | 5.69E-06    |
| EIF4E        | 2375.467304 | -0.442199199 | 0.113540309 | 3.32E-05    | 0.000298648 |
| PPP1CC       | 9494.082306 | -0.44217566  | 0.101816709 | 4.65E-06    | 5.05E-05    |
| TATDN1       | 695.4551502 | -0.44185318  | 0.113446686 | 3.31E-05    | 0.000298255 |
| SLC2A8       | 205.2086282 | 0.440997451  | 0.210824218 | 0.010099804 | 0.041113847 |
| BRF2         | 588.4477168 | -0.440825182 | 0.109594081 | 1.96E-05    | 0.000185957 |
| NOSIP        | 1636.454447 | 0.440658977  | 0.10105135  | 4.34E-06    | 4.74E-05    |
| UBE2D3       | 9476.467775 | -0.440544795 | 0.098464306 | 2.64E-06    | 3.02E-05    |
| AAK1         | 555.8503465 | 0.44048647   | 0.112238275 | 2.89E-05    | 0.000263966 |
| FAM117A      | 2193.796854 | 0.440411983  | 0.077567041 | 4.69E-09    | 8.89E-08    |
| ADD3         | 4757.238127 | 0.440230053  | 0.100846588 | 4.14E-06    | 4.54E-05    |
| RAP1GDS1     | 1618.188308 | -0.440088624 | 0.078141194 | 6.32E-09    | 1.16E-07    |
| LINC02009    | 9.553305491 | -0.440033063 | 0.841781974 | 0.015954562 | 0.059149036 |
| MIDN         | 857.5813546 | -0.439829893 | 0.107964987 | 1.59E-05    | 0.000154455 |
| HNRNPD       | 5525.304036 | -0.439234986 | 0.085461206 | 9.64E-08    | 1.47E-06    |
| BLVRB        | 847.3263935 | -0.439093255 | 0.101687107 | 5.48E-06    | 5.85E-05    |
| RMDN1        | 1095.802171 | -0.439006308 | 0.094661229 | 1.22E-06    | 1.51E-05    |
| TAF2         | 1386.857948 | -0.438963981 | 0.093199928 | 8.56E-07    | 1.10E-05    |
| PRKDC        | 8855.268547 | -0.438922036 | 0.081974335 | 3.03E-08    | 5.01E-07    |
| FZD2         | 89.26167833 | 0.438608256  | 0.254458702 | 0.021425794 | 0.07509344  |
| NAA15        | 3361.848039 | -0.438567395 | 0.082540916 | 3.77E-08    | 6.16E-07    |
| CCDC97       | 1221.469883 | 0.43848251   | 0.093849118 | 1.02E-06    | 1.28E-05    |
| EEF1A1P16    | 81.59206673 | -0.438434742 | 0.230661254 | 0.01545171  | 0.05765138  |
| SIL1         | 1549.689975 | -0.438361317 | 0.092150458 | 6.89E-07    | 8.97E-06    |
| CALCOCO2     | 1467.923766 | 0.438022216  | 0.085440502 | 1.02E-07    | 1.55E-06    |
| LOC105374445 | 66.7869446  | 0.437547994  | 0.259769955 | 0.022758025 | 0.078838764 |
| NDUFAB1      | 3464.82273  | -0.437406861 | 0.072850129 | 6.94E-10    | 1.49E-08    |
| IRAK2        | 285.2982962 | 0.437225194  | 0.132584194 | 0.000319006 | 0.002200887 |
| MIR6747      | 86.82431507 | -0.437032453 | 0.234049358 | 0.016780237 | 0.061486111 |
| SCN9A        | 375.3714482 | -0.436934076 | 0.123708169 | 0.000137319 | 0.001048946 |
| PPIP5K2      | 1188.538988 | -0.436792243 | 0.110104112 | 2.48E-05    | 0.000229552 |
| NEK3         | 383.6359143 | -0.436747557 | 0.120732068 | 9.94E-05    | 0.000791748 |
| B9D2         | 197.6700326 | 0.43650702   | 0.160333308 | 0.002042346 | 0.010919194 |
| MVD          | 992.1323019 | -0.436427348 | 0.107906162 | 1.82E-05    | 0.000174321 |

|              |             |              |             |             |             |
|--------------|-------------|--------------|-------------|-------------|-------------|
| ZC3H10       | 187.6463053 | 0.4358056    | 0.165030312 | 0.002540928 | 0.013119037 |
| HAGH         | 489.5127286 | -0.435769526 | 0.126233982 | 0.000187749 | 0.001382331 |
| MGAT5        | 1198.712055 | -0.435674166 | 0.091864383 | 7.42E-07    | 9.62E-06    |
| PARP8        | 334.4916703 | 0.435546039  | 0.124344536 | 0.000153968 | 0.001160252 |
| SOS1         | 1280.936916 | 0.435527571  | 0.095732995 | 1.85E-06    | 2.20E-05    |
| C1orf159     | 189.1768917 | 0.435265322  | 0.179605217 | 0.004657681 | 0.02174631  |
| CDC16        | 1883.656486 | -0.435112002 | 0.077531208 | 7.19E-09    | 1.31E-07    |
| CSPG5        | 6.921261341 | -0.435106095 | 0.803673726 | 0.018393213 | 0.066302095 |
| YAF2         | 717.1136811 | 0.435071659  | 0.17369367  | 0.003714648 | 0.017948258 |
| GPAT3        | 74.86032254 | -0.434772025 | 0.247576625 | 0.020644866 | 0.072767584 |
| IGHJ4        | 157.9354699 | -0.43466304  | 0.1855432   | 0.005808915 | 0.026067112 |
| MYL6B        | 966.2461734 | -0.434321444 | 0.092765985 | 1.01E-06    | 1.27E-05    |
| GNPTG        | 367.1344594 | -0.434302487 | 0.124662314 | 0.000168364 | 0.00125671  |
| RIT1         | 753.3259692 | -0.434292574 | 0.108151692 | 2.04E-05    | 0.000192926 |
| TEDC1        | 309.2663975 | 0.434223646  | 0.174581617 | 0.00393242  | 0.018837541 |
| LMNB1        | 2609.116733 | 0.434116829  | 0.076894633 | 5.85E-09    | 1.08E-07    |
| SLC12A6      | 211.9371862 | 0.433939976  | 0.167909952 | 0.002989657 | 0.015028126 |
| MYEF2        | 292.9890346 | 0.433927711  | 0.161142209 | 0.00221169  | 0.011687969 |
| RGPD1        | 307.2069967 | 0.433744909  | 0.129705777 | 0.000274412 | 0.001926226 |
| CDCA8        | 1977.276582 | 0.433620259  | 0.087184038 | 2.33E-07    | 3.32E-06    |
| SURF6        | 650.4681272 | 0.433585522  | 0.120369869 | 0.000106671 | 0.00084233  |
| LOC102723847 | 80.46179688 | -0.433362161 | 0.22570801  | 0.015226946 | 0.056964074 |
| GTF3C1       | 1260.317984 | -0.433358299 | 0.088199537 | 3.19E-07    | 4.45E-06    |
| UNC119       | 293.798017  | 0.43329051   | 0.132899541 | 0.000369698 | 0.00250374  |
| SLC7A5P2     | 199.1342261 | -0.432925254 | 0.219026714 | 0.013636263 | 0.052359016 |
| COPA         | 14317.90463 | -0.432858965 | 0.062551771 | 1.67E-12    | 5.22E-11    |
| PMVK         | 2214.221949 | -0.432499059 | 0.080685983 | 3.01E-08    | 4.98E-07    |
| RPS23P8      | 14527.3681  | -0.432043375 | 0.074037181 | 1.98E-09    | 3.97E-08    |
| HNRNPA1P8    | 1152.31738  | -0.43182965  | 0.101393765 | 7.21E-06    | 7.49E-05    |
| ISY1-RAB43   | 748.5652881 | 0.431561012  | 0.096720001 | 2.87E-06    | 3.25E-05    |
| GEMIN2       | 248.035321  | 0.431528845  | 0.143267671 | 0.000849674 | 0.005164553 |
| PPA2         | 3169.791369 | -0.431461393 | 0.075912788 | 4.77E-09    | 8.99E-08    |
| NSUN3        | 449.2922807 | 0.431304929  | 0.128276818 | 0.000256394 | 0.001817063 |
| EEF1B2       | 47193.54818 | -0.431278117 | 0.067098075 | 4.80E-11    | 1.20E-09    |
| CPLX1        | 92.86388816 | -0.43121952  | 0.2302893   | 0.016722197 | 0.061299381 |
| GTPBP1       | 1197.468761 | -0.431121181 | 0.124400089 | 0.000182158 | 0.001347472 |
| SSR2         | 24724.83894 | -0.430962683 | 0.067809658 | 7.78E-11    | 1.89E-09    |
| EVI5L        | 481.4223338 | 0.430925075  | 0.122087674 | 0.000141479 | 0.001075501 |
| SCFD2        | 721.0538399 | -0.430832303 | 0.099779498 | 5.63E-06    | 6.00E-05    |
| CCT3         | 29288.30403 | -0.430824089 | 0.060651352 | 4.78E-13    | 1.58E-11    |
| IGHA1        | 187273.9984 | -0.430617054 | 0.099782414 | 3.70E-06    | 4.10E-05    |
| SLC20A2      | 927.9748688 | -0.430134148 | 0.089758426 | 5.95E-07    | 7.85E-06    |
| ELAC1        | 215.3735177 | 0.430037574  | 0.165929196 | 0.002971358 | 0.01494916  |
| GGA2         | 1930.707869 | -0.42967791  | 0.080297403 | 3.20E-08    | 5.27E-07    |
| LZTS2        | 180.6411809 | 0.429583901  | 0.194651566 | 0.008162512 | 0.034464645 |
| ADRB1        | 10.6229612  | 0.429560149  | 0.668521417 | 0.029534715 | 0.096591627 |
| GSPT1        | 6400.21169  | -0.429405587 | 0.068046225 | 1.03E-10    | 2.45E-09    |
| CEP192       | 439.9146609 | 0.429345019  | 0.116750071 | 8.04E-05    | 0.000654841 |
| HSPA8P8      | 3778.520835 | -0.429212652 | 0.085066595 | 1.55E-07    | 2.29E-06    |
| SEMA4F       | 226.162253  | 0.429116137  | 0.149605889 | 0.001348754 | 0.007647797 |

|           |             |              |             |             |             |
|-----------|-------------|--------------|-------------|-------------|-------------|
| KIF4A     | 896.2902122 | 0.428269513  | 0.095956639 | 2.85E-06    | 3.24E-05    |
| KCTD18    | 501.7260742 | 0.428218422  | 0.113106601 | 5.29E-05    | 0.000452249 |
| ZNF605    | 138.1726802 | 0.428103484  | 0.206944589 | 0.0111548   | 0.044502796 |
| DVL3      | 1367.049057 | 0.427962334  | 0.08850532  | 4.76E-07    | 6.39E-06    |
| PCCA      | 896.4094581 | -0.427923015 | 0.089706762 | 6.69E-07    | 8.73E-06    |
| C4orf33   | 340.7702963 | -0.427845093 | 0.14630335  | 0.001136777 | 0.006641556 |
| UPP1      | 287.1494607 | 0.427569943  | 0.139430428 | 0.000728205 | 0.004536087 |
| CHST12    | 1550.049702 | 0.427505559  | 0.105326287 | 1.74E-05    | 0.000167948 |
| NFKB1     | 1890.204967 | -0.427301363 | 0.079012299 | 2.35E-08    | 3.95E-07    |
| ITGA4     | 13333.68548 | 0.427219143  | 0.095011571 | 2.44E-06    | 2.81E-05    |
| DCP1A     | 1230.808502 | -0.426897267 | 0.09753464  | 4.34E-06    | 4.74E-05    |
| KRT86     | 243.2894287 | 0.42688031   | 0.15028444  | 0.001479662 | 0.008303083 |
| MROH1     | 135.7579924 | 0.426828872  | 0.187417768 | 0.007018704 | 0.030530746 |
| ASPHD2    | 193.2093339 | 0.426708812  | 0.165256898 | 0.003127191 | 0.015628736 |
| ENOPH1    | 1310.785102 | -0.426701809 | 0.116345663 | 8.54E-05    | 0.000690406 |
| PUS7      | 1029.258951 | -0.426682644 | 0.091255775 | 1.06E-06    | 1.32E-05    |
| TOR1B     | 986.5080587 | 0.42654191   | 0.102662523 | 1.16E-05    | 0.000116069 |
| ARHGAP11A | 1521.07513  | 0.426534689  | 0.104005758 | 1.44E-05    | 0.000141321 |
| IKZF3     | 500.3823609 | 0.426364693  | 0.139904268 | 0.000763162 | 0.004721568 |
| NUSAP1    | 3377.532709 | 0.426262598  | 0.076671257 | 9.89E-09    | 1.77E-07    |
| CDK6      | 3733.62944  | -0.426220614 | 0.130403143 | 0.000370947 | 0.002510232 |
| CCDC113   | 101.0146178 | -0.426068348 | 0.254903465 | 0.024792475 | 0.084331427 |
| REEP5     | 1998.692702 | 0.426050955  | 0.090680995 | 9.47E-07    | 1.20E-05    |
| RASGRP3   | 2233.206111 | 0.425978136  | 0.092174519 | 1.37E-06    | 1.68E-05    |
| ANKDD1A   | 278.625924  | 0.425707371  | 0.13914803  | 0.000743619 | 0.004619622 |
| DERL1     | 5023.426093 | -0.425659543 | 0.0695469   | 3.50E-10    | 7.78E-09    |
| MSC       | 259.1612424 | -0.425584908 | 0.146587431 | 0.001244471 | 0.007133567 |
| MPHOSPH6  | 799.7753007 | -0.425258231 | 0.121441235 | 0.000160447 | 0.001202798 |
| MGST3     | 2303.426174 | -0.425153791 | 0.088310913 | 5.31E-07    | 7.08E-06    |
| B3GLCT    | 172.9894611 | 0.425124359  | 0.175064655 | 0.004747424 | 0.022117608 |
| ODAPH     | 9.609150816 | 0.425035901  | 0.657188217 | 0.030159629 | 0.098098101 |
| CHMP5     | 875.4231655 | 0.424937293  | 0.112277585 | 5.39E-05    | 0.000460496 |
| SORD2P    | 555.8215294 | -0.424652611 | 0.102187435 | 1.17E-05    | 0.000116692 |
| GOLGA8S   | 653.4137756 | 0.42449892   | 0.151603541 | 0.001669358 | 0.009217845 |
| AGK       | 3710.793867 | -0.424471501 | 0.067899432 | 1.52E-10    | 3.54E-09    |
| RPS2P5    | 8300.962306 | -0.424403998 | 0.091365922 | 1.25E-06    | 1.54E-05    |
| PFKL      | 3011.310245 | 0.424285167  | 0.091981214 | 1.44E-06    | 1.75E-05    |
| NCK2      | 341.8827756 | 0.424166769  | 0.12510368  | 0.000242311 | 0.001733212 |
| DENND3    | 157.2459235 | 0.424049077  | 0.176235821 | 0.005097593 | 0.02344622  |
| DDX6      | 7316.782458 | 0.423936843  | 0.087453956 | 4.56E-07    | 6.15E-06    |
| RPSAP19   | 2323.726953 | -0.423730922 | 0.098094618 | 5.73E-06    | 6.10E-05    |
| PAQR8     | 256.4406794 | 0.423696467  | 0.140254951 | 0.000849282 | 0.005163983 |
| TRAPPC2L  | 1351.670673 | -0.423306384 | 0.098998613 | 6.99E-06    | 7.28E-05    |
| AGMAT     | 150.6520613 | -0.423202289 | 0.178709199 | 0.005679634 | 0.025588625 |
| HLA-J     | 952.2477565 | 0.423079881  | 0.094208464 | 2.60E-06    | 2.98E-05    |
| ARHGEF18  | 732.9952004 | 0.42292258   | 0.122643678 | 0.000196369 | 0.001437244 |
| NIPA1     | 745.6445223 | 0.422824897  | 0.109142394 | 3.77E-05    | 0.000334262 |
| TMSB10    | 65249.85219 | 0.422767136  | 0.064834277 | 2.61E-11    | 6.84E-10    |
| CMIP      | 889.4364434 | -0.422734849 | 0.091576921 | 1.44E-06    | 1.75E-05    |
| DBF4B     | 326.5736858 | 0.422677505  | 0.12527095  | 0.000256447 | 0.001817063 |

|          |             |              |             |             |             |
|----------|-------------|--------------|-------------|-------------|-------------|
| ENTR1    | 659.2495953 | 0.422659789  | 0.104558565 | 1.89E-05    | 0.000181069 |
| ZNF749   | 136.5895676 | 0.422462979  | 0.177820301 | 0.005544895 | 0.025128038 |
| OTUD1    | 127.205873  | 0.422416919  | 0.189552581 | 0.007935761 | 0.033698765 |
| SNHG3    | 750.5074726 | -0.422409112 | 0.094814311 | 3.10E-06    | 3.49E-05    |
| IFNLR1   | 930.1944758 | 0.422325931  | 0.100104901 | 8.86E-06    | 9.02E-05    |
| NAAA     | 806.3489833 | -0.422284071 | 0.097715638 | 5.70E-06    | 6.08E-05    |
| CLMN     | 155.5271559 | -0.422227869 | 0.168879198 | 0.004047197 | 0.01928069  |
| ZNF440   | 122.929031  | 0.422205876  | 0.186649874 | 0.007368537 | 0.031757329 |
| PYM1     | 733.2823848 | 0.421982475  | 0.103856957 | 1.75E-05    | 0.000168825 |
| YPEL3    | 248.5508798 | 0.42169778   | 0.158841674 | 0.002623038 | 0.013466693 |
| RCBTB2   | 657.8202796 | 0.421490509  | 0.09813102  | 6.36E-06    | 6.68E-05    |
| PPDPF    | 783.9924972 | 0.421373921  | 0.115651429 | 9.54E-05    | 0.000763377 |
| ENTPD5   | 403.0093904 | 0.421169155  | 0.117169549 | 0.000113396 | 0.000886936 |
| SIRT5    | 223.0708336 | 0.421118101  | 0.144673532 | 0.001219063 | 0.007025129 |
| SULT1A4  | 138.6131759 | -0.420918191 | 0.177393538 | 0.005680122 | 0.025588625 |
| STS      | 6574.538965 | 0.420883999  | 0.078772618 | 3.38E-08    | 5.55E-07    |
| ZNF598   | 626.2431372 | -0.420748982 | 0.12588312  | 0.00029433  | 0.002049423 |
| GAR1     | 1310.373856 | -0.420639208 | 0.12168607  | 0.00019366  | 0.001419392 |
| ABCB9    | 216.5858961 | -0.420460784 | 0.153711985 | 0.002117533 | 0.011258616 |
| KIF11    | 2827.853892 | 0.420421571  | 0.099482616 | 8.45E-06    | 8.66E-05    |
| RPS7P14  | 90.58759155 | -0.420273534 | 0.215421718 | 0.015184556 | 0.056854262 |
| B3GAT3   | 722.5439623 | -0.420263965 | 0.104455778 | 2.11E-05    | 0.000199061 |
| WDR53    | 421.8764842 | 0.420258959  | 0.122725698 | 0.000217456 | 0.001570341 |
| SMIM30   | 721.2970064 | -0.420241788 | 0.144276732 | 0.001197724 | 0.00692983  |
| RPL13P12 | 8641.897158 | -0.420112577 | 0.122528014 | 0.000216083 | 0.001562384 |
| WSB2     | 434.0976249 | 0.420090406  | 0.120264399 | 0.000169621 | 0.001264451 |
| PPIL6    | 8.338367886 | 0.420072256  | 0.763473636 | 0.018295534 | 0.065991201 |
| VOPP1    | 4949.788336 | 0.420036585  | 0.084664402 | 2.60E-07    | 3.68E-06    |
| HAS3     | 59.5557551  | -0.419863354 | 0.262969283 | 0.02919702  | 0.095812923 |
| EVL      | 176.2170571 | 0.419858533  | 0.179713683 | 0.006197643 | 0.027540308 |
| PIK3IP1  | 389.2138863 | -0.419777469 | 0.117446648 | 0.000126538 | 0.000977366 |
| CAP1     | 7323.795974 | 0.419767156  | 0.066110348 | 8.24E-11    | 1.99E-09    |
| PGAP6    | 361.2659598 | -0.419545636 | 0.139628934 | 0.000922783 | 0.005550478 |
| RPL14P1  | 4324.168171 | -0.419437956 | 0.08154167  | 9.63E-08    | 1.46E-06    |
| ANKRD13D | 280.090438  | 0.419210577  | 0.148675187 | 0.001632201 | 0.009053433 |
| HOXB7    | 232.2120645 | 0.418823182  | 0.142042003 | 0.001094795 | 0.006426632 |
| KCTD6    | 301.7095011 | -0.418656633 | 0.175427104 | 0.005454627 | 0.024772562 |
| TCAF1P1  | 81.33933486 | 0.418252217  | 0.23808884  | 0.022020555 | 0.076819088 |
| STIL     | 1079.007187 | 0.418251776  | 0.090122034 | 1.29E-06    | 1.58E-05    |
| GALT     | 194.5652271 | -0.418099208 | 0.156029347 | 0.002491212 | 0.012926855 |
| EIF4BP2  | 193.1709909 | -0.417755806 | 0.153285377 | 0.002188104 | 0.011593177 |
| MIGA2    | 398.6340038 | 0.417644851  | 0.146333299 | 0.001477157 | 0.008294399 |
| ATP6VOC  | 1528.425209 | -0.417607635 | 0.117638358 | 0.000139939 | 0.001065198 |
| YTHDF3   | 2698.264225 | -0.417516931 | 0.116957809 | 0.00013055  | 0.001004768 |
| IGHV3-64 | 886.2653488 | -0.417507817 | 0.122971741 | 0.000248276 | 0.001770028 |
| ZNF548   | 287.1843067 | 0.417496379  | 0.142536095 | 0.001168988 | 0.0067908   |
| E2F8     | 469.6538436 | 0.417492142  | 0.112030508 | 6.98E-05    | 0.000579125 |
| FRK      | 87.14996964 | 0.417474924  | 0.245961453 | 0.024623957 | 0.083857044 |
| SRGAP2   | 445.1286907 | 0.417432871  | 0.113836974 | 8.78E-05    | 0.000707799 |
| PTTG1    | 2244.477773 | 0.417350544  | 0.089855334 | 1.27E-06    | 1.56E-05    |

|           |             |              |             |             |             |
|-----------|-------------|--------------|-------------|-------------|-------------|
| NAE1      | 2249.206713 | -0.417232369 | 0.084193606 | 2.74E-07    | 3.88E-06    |
| SULT1A3   | 138.7767621 | -0.416946345 | 0.177014661 | 0.006037491 | 0.02695314  |
| TRABD2A   | 835.252875  | 0.416904108  | 0.095574216 | 4.79E-06    | 5.19E-05    |
| DDX21     | 11246.13137 | -0.416696572 | 0.084470332 | 3.07E-07    | 4.31E-06    |
| HSP90AA2P | 1234.024102 | -0.416645831 | 0.094034445 | 3.53E-06    | 3.92E-05    |
| ETHE1     | 381.940726  | 0.416450449  | 0.135967441 | 0.000767482 | 0.004744905 |
| SLC7A11   | 1115.105355 | 0.41642673   | 0.149129465 | 0.001768573 | 0.009676583 |
| PRXL2C    | 177.1020122 | 0.416251554  | 0.192488354 | 0.009569127 | 0.039332676 |
| NUMB      | 707.5809705 | 0.416096883  | 0.107015479 | 3.63E-05    | 0.000323689 |
| RPS7P1    | 20957.66508 | -0.415913892 | 0.073012105 | 4.78E-09    | 9.00E-08    |
| RIPK3     | 92.92531869 | 0.415759979  | 0.220325925 | 0.017499712 | 0.063784994 |
| IL4R      | 123.9612516 | 0.415512639  | 0.186639255 | 0.008226271 | 0.034660421 |
| PLD6      | 471.3464565 | 0.415471327  | 0.112836794 | 8.45E-05    | 0.000683693 |
| PHF21A    | 185.4001589 | 0.414861542  | 0.176158548 | 0.005980437 | 0.026732893 |
| UPF1      | 2476.026616 | 0.414734495  | 0.094271175 | 4.05E-06    | 4.45E-05    |
| SLC16A10  | 330.8289853 | -0.414624045 | 0.124381774 | 0.000310958 | 0.002148785 |
| RUBCN     | 1668.048851 | -0.414539607 | 0.107815386 | 4.45E-05    | 0.000387031 |
| PIDD1     | 177.0961684 | -0.414126056 | 0.206729904 | 0.013995053 | 0.053381571 |
| ZNF134    | 271.4055024 | 0.414121926  | 0.137861846 | 0.000935402 | 0.00561468  |
| PRC1      | 1570.801727 | 0.414110837  | 0.079044712 | 6.14E-08    | 9.63E-07    |
| RPL10P3   | 315.083834  | -0.414021156 | 0.129668166 | 0.000505082 | 0.003291875 |
| DNAJC10   | 3489.576049 | -0.413837107 | 0.085000204 | 4.29E-07    | 5.80E-06    |
| NOCT      | 152.656517  | -0.413831971 | 0.181590939 | 0.007304117 | 0.031541597 |
| SLC25A37  | 434.0897252 | -0.413725944 | 0.11903236  | 0.00018463  | 0.00136285  |
| RALY      | 8311.928329 | 0.413599563  | 0.079445734 | 6.97E-08    | 1.08E-06    |
| GNL3L     | 631.7403646 | 0.413559194  | 0.117516611 | 0.000158082 | 0.001187126 |
| CBX4      | 1331.373986 | -0.413430778 | 0.091027425 | 2.12E-06    | 2.49E-05    |
| COP55     | 1649.267838 | -0.413200845 | 0.076379749 | 2.44E-08    | 4.10E-07    |
| MED12     | 735.8731855 | 0.412978636  | 0.102891136 | 2.21E-05    | 0.00020739  |
| KIAA1109  | 613.5240699 | -0.412804019 | 0.109577614 | 6.08E-05    | 0.000513454 |
| RPS25P8   | 768.2237394 | -0.412753433 | 0.11367806  | 0.000104931 | 0.000830481 |
| NFE2L3    | 3239.142092 | 0.412678343  | 0.0719669   | 3.75E-09    | 7.21E-08    |
| RPS6P1    | 1308.784869 | -0.412645785 | 0.10141815  | 1.80E-05    | 0.000172213 |
| LILRB1    | 417.4877792 | -0.412531812 | 0.114890403 | 0.000121888 | 0.000945246 |
| POLR3GL   | 2195.157644 | 0.412514977  | 0.078533327 | 5.70E-08    | 9.00E-07    |
| TSHR      | 172.9876325 | 0.412490565  | 0.16941304  | 0.004949335 | 0.022880381 |
| AJM1      | 105.0021951 | 0.412312955  | 0.208073873 | 0.014468418 | 0.05478889  |
| AMPD1     | 311.6199674 | -0.411997696 | 0.13806135  | 0.001005067 | 0.005968707 |
| SP140L    | 627.3750213 | 0.411925015  | 0.10510626  | 3.28E-05    | 0.000295928 |
| RPL39P15  | 2810.924476 | -0.411837041 | 0.074264605 | 1.14E-08    | 2.02E-07    |
| PDK1      | 4645.990956 | -0.411770497 | 0.091050958 | 2.34E-06    | 2.72E-05    |
| ASPHD1    | 94.66057327 | -0.411611088 | 0.236958803 | 0.023884611 | 0.081789562 |
| TTN       | 284.237112  | -0.411524946 | 0.155920838 | 0.002845965 | 0.014461141 |
| RPL26P6   | 112.6875806 | 0.411236767  | 0.256921733 | 0.029659944 | 0.096873113 |
| SPIN4     | 388.0743813 | 0.411179389  | 0.18677492  | 0.008844276 | 0.036807578 |
| FHOD1     | 662.2164766 | -0.411158035 | 0.11524519  | 0.000134975 | 0.001032861 |
| PRR12     | 273.3684941 | 0.410973854  | 0.15395222  | 0.00260716  | 0.013401068 |
| C12orf76  | 88.31579989 | -0.410823646 | 0.232812928 | 0.022597992 | 0.078460295 |
| EXOG      | 257.2839854 | -0.410774422 | 0.150119011 | 0.002202063 | 0.01165794  |
| MACROD1   | 343.4828005 | -0.410744326 | 0.154955185 | 0.002799566 | 0.01425885  |



|              |             |              |             |             |             |
|--------------|-------------|--------------|-------------|-------------|-------------|
| DPP7         | 2900.229107 | 0.410691194  | 0.102913367 | 2.59E-05    | 0.000239699 |
| SLC25A32     | 1093.150862 | -0.410382229 | 0.109608347 | 6.78E-05    | 0.000564682 |
| SEC24A       | 1708.547493 | -0.410381441 | 0.116772169 | 0.000162459 | 0.001215777 |
| BLM          | 993.3989807 | 0.410251218  | 0.10000669  | 1.53E-05    | 0.000148986 |
| CCDC163      | 187.4609859 | 0.410183407  | 0.16290104  | 0.004011007 | 0.019145149 |
| PRIMPOL      | 97.28689133 | 0.409994018  | 0.213766931 | 0.016746017 | 0.061373708 |
| FAM107B      | 3424.909795 | 0.409674619  | 0.082988504 | 3.00E-07    | 4.21E-06    |
| NIN          | 449.8846202 | 0.409645897  | 0.131781843 | 0.000668066 | 0.004196192 |
| TM9SF2       | 9376.203218 | -0.409618427 | 0.072047921 | 5.15E-09    | 9.59E-08    |
| TBC1D14      | 1803.65952  | 0.40936668   | 0.080800744 | 1.58E-07    | 2.31E-06    |
| ZNF420       | 215.0019865 | 0.409288681  | 0.154826244 | 0.002825553 | 0.014378517 |
| INHBE        | 978.4106912 | -0.409046903 | 0.0920022   | 3.39E-06    | 3.79E-05    |
| RB1          | 4022.159844 | 0.408767775  | 0.12579323  | 0.000419463 | 0.002798087 |
| MORN2        | 266.705625  | -0.408648152 | 0.139655592 | 0.001239033 | 0.007116527 |
| CEP170       | 414.0243408 | 0.408165074  | 0.133031068 | 0.000769368 | 0.004753171 |
| F11R         | 2851.396723 | -0.408132482 | 0.069014889 | 1.34E-09    | 2.76E-08    |
| ABCC1        | 1490.100194 | -0.408027252 | 0.081804479 | 2.40E-07    | 3.42E-06    |
| AIG1         | 997.9846681 | -0.407825324 | 0.088427608 | 1.56E-06    | 1.88E-05    |
| UQCRC2       | 6642.440026 | -0.407258341 | 0.064472464 | 1.08E-10    | 2.56E-09    |
| ENDOG        | 345.5230197 | 0.406945307  | 0.167164595 | 0.005084904 | 0.023400286 |
| TTC13        | 309.4022681 | -0.406944707 | 0.159421696 | 0.003687883 | 0.017853809 |
| ZNF468       | 568.1338363 | 0.406909058  | 0.117156582 | 0.000189762 | 0.001394783 |
| DOLK         | 582.2043644 | 0.406819738  | 0.12870119  | 0.000576631 | 0.003698342 |
| OSER1        | 1596.125259 | -0.406660023 | 0.077705382 | 6.60E-08    | 1.03E-06    |
| PECR         | 706.603887  | -0.406452047 | 0.103611681 | 3.36E-05    | 0.000301655 |
| BAIAP2L1     | 156.9842078 | 0.406322253  | 0.172976045 | 0.006373222 | 0.02819752  |
| METAP1       | 2118.908532 | -0.405913527 | 0.07303125  | 1.09E-08    | 1.94E-07    |
| INTS6P1      | 83.66459939 | -0.405699199 | 0.225731904 | 0.021815689 | 0.076181144 |
| CYB561D1     | 255.3989452 | 0.405582417  | 0.147763078 | 0.002148911 | 0.011414936 |
| TRIM9        | 243.8102463 | -0.40545157  | 0.147887678 | 0.002180066 | 0.011562697 |
| GTPBP2       | 395.9382427 | 0.40541354   | 0.121666705 | 0.000319342 | 0.00220233  |
| DEPTOR       | 412.9939923 | 0.405380828  | 0.114312715 | 0.000146461 | 0.001110449 |
| AIFM2        | 396.1883538 | 0.405264173  | 0.122681953 | 0.000357229 | 0.002426886 |
| OCIAD2       | 1889.749377 | -0.405240106 | 0.085613356 | 8.70E-07    | 1.11E-05    |
| TRUB2        | 1641.961438 | 0.405176591  | 0.080452357 | 1.88E-07    | 2.71E-06    |
| LMNA         | 8836.352547 | -0.405139704 | 0.090004087 | 2.65E-06    | 3.03E-05    |
| POC1B-GALNT4 | 168.999805  | 0.404933701  | 0.186495956 | 0.009817598 | 0.04021082  |
| ARID2        | 1413.527358 | 0.404910569  | 0.107725323 | 6.43E-05    | 0.000539216 |
| DCTN5        | 3323.966722 | -0.404904754 | 0.071194934 | 5.26E-09    | 9.77E-08    |
| DDX19A       | 1679.655762 | -0.404865467 | 0.082037446 | 3.20E-07    | 4.47E-06    |
| TAF8         | 430.5540059 | 0.404770902  | 0.113994615 | 0.00014475  | 0.001098922 |
| DUSP14       | 1073.964376 | -0.404636954 | 0.095422355 | 8.62E-06    | 8.80E-05    |
| ADA2         | 192.2437985 | 0.404540499  | 0.171980077 | 0.006396614 | 0.028273287 |
| LEFTY2       | 78.85030152 | -0.404516017 | 0.232038238 | 0.024470866 | 0.083417713 |
| TMCO1        | 18814.57081 | -0.404514912 | 0.073851343 | 1.75E-08    | 2.98E-07    |
| PSLNR        | 9.142911986 | -0.404266483 | 0.680450851 | 0.024236512 | 0.08278179  |
| ANAPC2       | 638.5744312 | 0.40425423   | 0.119581341 | 0.000270957 | 0.001905834 |
| TACC3        | 874.1664009 | 0.404238585  | 0.098682505 | 1.61E-05    | 0.000156202 |
| HNRNPA1P7    | 3753.868367 | -0.404109384 | 0.074344211 | 2.19E-08    | 3.70E-07    |
| NT5DC3       | 402.1910412 | -0.403960716 | 0.150151418 | 0.002528937 | 0.01309099  |

|                |             |              |             |             |             |
|----------------|-------------|--------------|-------------|-------------|-------------|
| UNC13A         | 711.7171891 | -0.403677355 | 0.122193842 | 0.000358102 | 0.002431865 |
| GATM           | 400.070104  | 0.403426323  | 0.141363945 | 0.001557221 | 0.00867924  |
| RPS23          | 39223.83708 | -0.403366542 | 0.079547025 | 1.57E-07    | 2.31E-06    |
| RGS16          | 1442.976188 | -0.403310168 | 0.095333107 | 9.19E-06    | 9.31E-05    |
| GALNT4         | 160.0032418 | 0.403284208  | 0.192115416 | 0.011601983 | 0.045859746 |
| PDLIM2         | 118.5773244 | -0.403197719 | 0.245170879 | 0.029418983 | 0.09630407  |
| RPS18P5        | 6136.876805 | -0.40318553  | 0.135033677 | 0.001046017 | 0.006173782 |
| WDFY2          | 397.1358597 | -0.403163662 | 0.116099524 | 0.000196343 | 0.001437244 |
| ST20           | 110.7438985 | 0.40308687   | 0.224243595 | 0.022089688 | 0.076998215 |
| DCAF11         | 1928.447114 | 0.403034236  | 0.089194209 | 2.41E-06    | 2.79E-05    |
| VKORC1         | 1493.420389 | -0.402988992 | 0.117382361 | 0.000228577 | 0.001646532 |
| ZER1           | 858.2592123 | 0.402595527  | 0.102098557 | 3.10E-05    | 0.000280873 |
| TMEM14C        | 1667.583935 | -0.402476314 | 0.09389835  | 7.20E-06    | 7.48E-05    |
| TNRC6B         | 634.3400287 | 0.402315955  | 0.110578381 | 0.000104149 | 0.00082519  |
| GSDMD          | 261.0193296 | 0.402219543  | 0.156851705 | 0.003675888 | 0.017810674 |
| LOC84773-CYHR1 | 152.6513341 | 0.40220482   | 0.174544341 | 0.00725268  | 0.031375135 |
| SEMA4D         | 209.6467399 | 0.402097681  | 0.157228893 | 0.003707167 | 0.017922113 |
| NT5DC2         | 3203.003655 | -0.402073332 | 0.090320784 | 3.39E-06    | 3.78E-05    |
| STRAP          | 8224.01557  | -0.402053728 | 0.070204223 | 4.19E-09    | 8.01E-08    |
| MCAT           | 589.282149  | 0.402011045  | 0.12242945  | 0.000385437 | 0.002600161 |
| LAMTOR2        | 1837.577362 | -0.401924412 | 0.084484812 | 7.89E-07    | 1.02E-05    |
| SRCAP          | 1677.925059 | -0.401912844 | 0.096390651 | 1.19E-05    | 0.000118973 |
| CNOT1          | 9930.367727 | -0.401867828 | 0.061688557 | 3.01E-11    | 7.80E-10    |
| MEST           | 1619.603326 | -0.401844467 | 0.082197561 | 4.06E-07    | 5.52E-06    |
| LCT            | 109.0518473 | -0.401703848 | 0.220539877 | 0.021433367 | 0.075103525 |
| ZFAND2B        | 448.0769363 | 0.401657953  | 0.123435886 | 0.000427325 | 0.002845054 |
| MCM4           | 6775.403541 | -0.4016295   | 0.064048025 | 1.48E-10    | 3.45E-09    |
| EARS2          | 605.0548012 | -0.401588385 | 0.101167947 | 2.81E-05    | 0.000257918 |
| TM7SF2         | 223.4937306 | -0.401471079 | 0.163828218 | 0.00506403  | 0.023335232 |
| MRPL20-AS1     | 172.3769415 | 0.401446429  | 0.169373752 | 0.006157382 | 0.027410636 |
| DET1           | 99.20004666 | 0.401420029  | 0.210088311 | 0.017686408 | 0.064289573 |
| HADHB          | 4255.167612 | -0.401286882 | 0.069728828 | 3.56E-09    | 6.87E-08    |
| TOR3A          | 1861.348547 | -0.401100273 | 0.081164587 | 3.13E-07    | 4.38E-06    |
| RNF135         | 254.2518794 | 0.400816135  | 0.155228858 | 0.003504155 | 0.017161046 |
| LINC00339      | 115.8116534 | 0.400782039  | 0.193817596 | 0.012674355 | 0.049244291 |
| RPS15AP1       | 299.3546294 | -0.400750444 | 0.198898975 | 0.014483844 | 0.054835315 |
| POLB           | 681.0714672 | -0.40065039  | 0.096327604 | 1.26E-05    | 0.000125462 |
| SUSD3          | 432.5110404 | 0.400629848  | 0.140636786 | 0.001607112 | 0.008928571 |
| SPTY2D1        | 1902.479751 | -0.400359566 | 0.103188406 | 4.04E-05    | 0.000354749 |
| DNMBP          | 156.4722762 | 0.400105704  | 0.176918971 | 0.008095419 | 0.034267505 |
| INTS6          | 2189.029055 | -0.400054291 | 0.098354979 | 1.87E-05    | 0.000178873 |
| CREBRF         | 805.5873391 | -0.399647102 | 0.135181283 | 0.001155349 | 0.006725103 |
| CT45A10        | 368.6031087 | 0.399252496  | 0.132976912 | 0.000997981 | 0.005938847 |
| CCDC32         | 1165.204723 | 0.399154786  | 0.104043823 | 4.89E-05    | 0.000420635 |
| LARS2          | 1236.031389 | -0.399037461 | 0.083669197 | 7.51E-07    | 9.72E-06    |
| TOM1L2         | 318.791297  | 0.398719834  | 0.156804035 | 0.003935356 | 0.018846393 |
| FOXO3          | 2313.202249 | -0.398695537 | 0.074939902 | 4.22E-08    | 6.87E-07    |
| ZNF787         | 799.6811696 | 0.398652718  | 0.133918727 | 0.001085309 | 0.006373108 |
| DPY19L1        | 1614.911824 | -0.398599954 | 0.117502492 | 0.000266139 | 0.001875752 |
| MORF4L2        | 3922.484003 | -0.398578504 | 0.080855099 | 3.34E-07    | 4.63E-06    |

|              |             |              |             |             |             |
|--------------|-------------|--------------|-------------|-------------|-------------|
| CHFR         | 692.1326204 | 0.398252796  | 0.112576626 | 0.000156545 | 0.0011766   |
| C8orf76      | 285.8854737 | -0.39825244  | 0.147333076 | 0.002536641 | 0.013105559 |
| TMED7-TICAM2 | 256.2464094 | -0.398205314 | 0.137512035 | 0.001410539 | 0.00796683  |
| DNMT3B       | 1483.479687 | -0.397996946 | 0.08426737  | 9.40E-07    | 1.19E-05    |
| LOC124904621 | 9.058168306 | 0.397903192  | 0.642442361 | 0.028092785 | 0.092911144 |
| VPS35        | 4680.386718 | -0.397873987 | 0.076497548 | 8.09E-08    | 1.24E-06    |
| AKAP11       | 882.684873  | 0.397869502  | 0.132285953 | 0.000975307 | 0.005821918 |
| ADGRL3       | 117.0218665 | -0.397651126 | 0.204289354 | 0.016923991 | 0.061973515 |
| MAP3K2-DT    | 101.4762606 | -0.39724725  | 0.207695075 | 0.01825938  | 0.065915714 |
| DNAJC5       | 1539.674557 | 0.39723545   | 0.095393973 | 1.23E-05    | 0.000122817 |
| TENT5C       | 8149.343996 | -0.397063071 | 0.086898213 | 1.98E-06    | 2.34E-05    |
| TERF2IP      | 2831.628071 | -0.397053087 | 0.069653812 | 4.95E-09    | 9.27E-08    |
| NSA2         | 4703.650312 | -0.396329906 | 0.069266325 | 4.36E-09    | 8.29E-08    |
| TMA7         | 2607.965886 | -0.396287893 | 0.077605515 | 1.35E-07    | 2.03E-06    |
| RNF181       | 2081.25456  | 0.396112324  | 0.092443836 | 7.33E-06    | 7.60E-05    |
| GAMT         | 795.8974297 | -0.39610822  | 0.116101011 | 0.000253952 | 0.001805291 |
| PACSIN3      | 194.1143387 | -0.396041597 | 0.176096234 | 0.008587691 | 0.035903679 |
| ATP5MC1      | 5156.004341 | -0.395667727 | 0.084208799 | 1.07E-06    | 1.34E-05    |
| LEF1         | 656.9653646 | -0.395496317 | 0.098922031 | 2.57E-05    | 0.000237928 |
| IL23A        | 220.5217067 | -0.395448046 | 0.149969599 | 0.003090196 | 0.015466164 |
| CADM1        | 7981.227806 | 0.39537672   | 0.086369233 | 1.88E-06    | 2.24E-05    |
| GLT8D1       | 789.0453469 | -0.395366272 | 0.106046646 | 7.70E-05    | 0.000632508 |
| PRKAR2B      | 196.074585  | -0.395332361 | 0.225144869 | 0.024592371 | 0.083765949 |
| DBP          | 183.6448925 | 0.395319217  | 0.19684043  | 0.014876947 | 0.055968736 |
| SNCAIP       | 7.738670027 | -0.395183428 | 0.637820944 | 0.029637893 | 0.096837621 |
| ARMC7        | 217.9526991 | 0.394947271  | 0.173140919 | 0.007847967 | 0.033424311 |
| SRRM2        | 4735.546322 | -0.394769447 | 0.113230753 | 0.000193175 | 0.001416861 |
| ZFAND1       | 749.1594878 | -0.394629084 | 0.114118794 | 0.000212967 | 0.001543577 |
| PLEKHA2      | 1350.963976 | 0.394599551  | 0.090280934 | 4.99E-06    | 5.37E-05    |
| ANKRD54      | 311.2351122 | 0.39449429   | 0.133917733 | 0.001218722 | 0.007025129 |
| MLST8        | 1213.445622 | -0.394319582 | 0.098237605 | 2.42E-05    | 0.000225156 |
| E2F1         | 856.7593148 | 0.394306229  | 0.106641899 | 8.62E-05    | 0.000695344 |
| PLA2G12A     | 736.3118553 | -0.394272606 | 0.102711116 | 4.93E-05    | 0.000423087 |
| HMMR         | 1965.449727 | 0.394152861  | 0.116488616 | 0.00027707  | 0.001943303 |
| PAM16        | 170.3153294 | -0.394130376 | 0.186405171 | 0.011991099 | 0.047025679 |
| ARMC2        | 121.7547169 | 0.394119415  | 0.190767326 | 0.013105201 | 0.050713468 |
| PMPCB        | 3128.350361 | -0.39404434  | 0.07791029  | 1.75E-07    | 2.55E-06    |
| EXOSC2       | 1026.351908 | 0.393756745  | 0.090838959 | 5.90E-06    | 6.25E-05    |
| PPP6C        | 2746.897078 | 0.393612135  | 0.098742419 | 2.63E-05    | 0.000242841 |
| CNEP1R1      | 267.131983  | -0.393587779 | 0.142586592 | 0.00217243  | 0.011529257 |
| MAP1LC3B2    | 516.1973635 | -0.393161331 | 0.107030768 | 9.61E-05    | 0.000767823 |
| CAMTA1       | 635.3478733 | 0.393140259  | 0.102875097 | 5.30E-05    | 0.00045287  |
| RPS15AP17    | 524.2043849 | -0.392798701 | 0.142214919 | 0.002188491 | 0.011593177 |
| NET1         | 3442.641201 | 0.392796386  | 0.085644079 | 1.83E-06    | 2.18E-05    |
| ZHX1         | 932.272721  | -0.392748894 | 0.099478984 | 3.16E-05    | 0.000285602 |
| IQSEC3       | 243.1472922 | -0.392637393 | 0.164299311 | 0.006060049 | 0.027032938 |
| IGHV3-20     | 1343.395231 | -0.392571255 | 0.137523755 | 0.001643729 | 0.009103373 |
| DCUN1D3      | 87.05457253 | -0.392510541 | 0.232900596 | 0.02878062  | 0.094787751 |
| PPP1R13B     | 156.5885299 | 0.392170519  | 0.188234987 | 0.012710625 | 0.049340932 |
| RAB40B       | 118.0250246 | -0.391943387 | 0.193305081 | 0.01465935  | 0.055378699 |

|                  |             |              |             |             |             |
|------------------|-------------|--------------|-------------|-------------|-------------|
| EXOSC7           | 1051.86377  | -0.391929048 | 0.085618032 | 1.95E-06    | 2.30E-05    |
| ARPC1A           | 1723.434092 | 0.391515792  | 0.082819194 | 9.36E-07    | 1.19E-05    |
| SYS1-DBNDD2      | 108.1975695 | 0.391503231  | 0.224149945 | 0.025656561 | 0.086573395 |
| EIF2B1           | 1473.373013 | -0.39136415  | 0.081219626 | 6.04E-07    | 7.95E-06    |
| SGO2             | 843.9520757 | 0.391095057  | 0.137797081 | 0.001714773 | 0.009430053 |
| UGGT2            | 655.7846243 | -0.391030115 | 0.114990965 | 0.000265933 | 0.001875063 |
| OPLAH            | 182.053103  | -0.390785943 | 0.180101487 | 0.010619607 | 0.04279724  |
| TNIK             | 470.5425061 | 0.390692641  | 0.109094505 | 0.000135706 | 0.001037537 |
| CUL9             | 178.46652   | 0.39056109   | 0.165296929 | 0.006568358 | 0.028905781 |
| SSR3             | 17107.86141 | -0.390423626 | 0.073859206 | 5.38E-08    | 8.54E-07    |
| YWHAZ            | 18697.22803 | -0.390204361 | 0.104423094 | 7.32E-05    | 0.000604237 |
| PIGX             | 769.413016  | 0.390201713  | 0.106140995 | 9.49E-05    | 0.000760146 |
| SERPINH1         | 299.2672296 | -0.390191718 | 0.165625236 | 0.006742109 | 0.029527846 |
| PIP5K1A          | 4034.721885 | -0.389939812 | 0.065761832 | 1.34E-09    | 2.76E-08    |
| MIDEAS           | 562.0617061 | 0.389932863  | 0.107098182 | 0.000108362 | 0.000852571 |
| DPF3             | 132.5556648 | 0.389904246  | 0.190258203 | 0.013923117 | 0.053259691 |
| SUCO             | 1688.713407 | -0.389715631 | 0.100467342 | 4.26E-05    | 0.000372293 |
| EIF4BP3          | 1647.48279  | -0.389625577 | 0.077271749 | 1.94E-07    | 2.80E-06    |
| STUB1            | 1057.281642 | -0.389165925 | 0.1209561   | 0.000515873 | 0.003357151 |
| MFSD6            | 2242.26892  | 0.388930083  | 0.087558054 | 3.64E-06    | 4.03E-05    |
| LAMP1            | 4600.201752 | -0.388873488 | 0.073496848 | 5.17E-08    | 8.25E-07    |
| ZCCHC4           | 285.5420755 | 0.388831185  | 0.143395157 | 0.002529827 | 0.01309099  |
| MIR3654          | 1676.951848 | -0.388708948 | 0.089163315 | 5.52E-06    | 5.90E-05    |
| FAM83D           | 941.5999972 | 0.388341083  | 0.113961302 | 0.000261132 | 0.001844216 |
| LOC105378179     | 1175.526383 | 0.388178419  | 1.082872002 | 4.60E-06    | 5.00E-05    |
| DCAF13           | 2849.785674 | -0.388176178 | 0.076052098 | 1.40E-07    | 2.09E-06    |
| RPS12            | 49491.53495 | -0.388156959 | 0.083223721 | 1.36E-06    | 1.66E-05    |
| ETAA1            | 312.7383059 | 0.388156184  | 0.193384784 | 0.015190942 | 0.056865874 |
| NAGPA            | 361.620066  | -0.388078749 | 0.168373698 | 0.007795025 | 0.033256085 |
| NCEH1            | 574.4846287 | 0.38801063   | 0.106798815 | 0.000112342 | 0.000880285 |
| LILRP2           | 6.703438052 | 0.387865767  | 0.675084687 | 0.021647509 | 0.075715998 |
| CAPN12           | 161.4068725 | 0.387856301  | 0.181549878 | 0.011596191 | 0.045847315 |
| MIR6805          | 157.0536283 | 0.387749511  | 0.16498685  | 0.006850612 | 0.029938199 |
| NUP35            | 998.4969243 | 0.387401245  | 0.090418466 | 7.58E-06    | 7.84E-05    |
| EIF2S3           | 7243.970457 | -0.387305175 | 0.083560161 | 1.50E-06    | 1.82E-05    |
| THUMPD1          | 1756.196679 | -0.387283475 | 0.095210246 | 1.87E-05    | 0.000178832 |
| MED28            | 2394.427649 | -0.386951318 | 0.074510047 | 8.76E-08    | 1.34E-06    |
| NECAP1           | 1122.843705 | -0.386366108 | 0.086180453 | 3.11E-06    | 3.50E-05    |
| ATP2A2           | 12145.17505 | -0.386365688 | 0.064599707 | 9.72E-10    | 2.04E-08    |
| SMARCA5          | 4433.391451 | -0.386338795 | 0.076075835 | 1.62E-07    | 2.37E-06    |
| ODF2             | 1113.885174 | 0.386072096  | 0.090502307 | 8.21E-06    | 8.43E-05    |
| SH2B2            | 2676.662101 | 0.38607065   | 0.128112448 | 0.00101519  | 0.006020561 |
| C2orf74-DT       | 145.5283054 | 0.386041432  | 0.176035217 | 0.010170553 | 0.041343537 |
| PDXDC2P-NPIPB14P | 229.3896847 | -0.386001407 | 0.143269066 | 0.00272557  | 0.013935249 |
| POU6F1           | 160.796943  | 0.38591329   | 0.170462068 | 0.008595213 | 0.035926456 |
| TADA2B           | 510.729585  | 0.385903032  | 0.115040245 | 0.000320014 | 0.002204328 |
| IL16             | 2863.542557 | 0.385879536  | 0.079726059 | 5.43E-07    | 7.23E-06    |
| RPL35P2          | 476.3337067 | 0.385851545  | 0.175117338 | 0.009939081 | 0.0405778   |
| TBCA             | 4256.263395 | -0.385602482 | 0.074181115 | 8.62E-08    | 1.32E-06    |
| DOK4             | 225.696293  | 0.385447273  | 0.16963511  | 0.0084279   | 0.035355122 |

|                |             |              |             |             |             |
|----------------|-------------|--------------|-------------|-------------|-------------|
| ETV6           | 774.4390654 | 0.385439863  | 0.106792414 | 0.000125197 | 0.000968309 |
| CENPU          | 1495.992256 | 0.385417976  | 0.089585981 | 7.03E-06    | 7.32E-05    |
| ZNF547         | 90.83898291 | 0.385404425  | 0.217647809 | 0.025181367 | 0.085335759 |
| SFR1           | 134.3147272 | 0.385152843  | 0.199167492 | 0.01820651  | 0.065793435 |
| HNRNPA1P12     | 812.0979756 | -0.384346819 | 0.095427572 | 2.36E-05    | 0.000220618 |
| LOC729973      | 370.0732862 | -0.38432518  | 0.149921922 | 0.00395229  | 0.018904175 |
| ZNF28          | 574.0306318 | 0.38423142   | 0.114540857 | 0.000319969 | 0.002204328 |
| SPNS1          | 1245.002327 | -0.384196438 | 0.117580726 | 0.000443156 | 0.00293803  |
| ARHGAP11A-SCG5 | 353.4819589 | 0.384140207  | 0.122291749 | 0.000670477 | 0.004209807 |
| PIP5K1B        | 182.3629579 | -0.384077469 | 0.16227974  | 0.006746191 | 0.029538254 |
| MRPL15         | 2815.596198 | -0.384072704 | 0.070768349 | 2.48E-08    | 4.15E-07    |
| MAP4K4         | 1607.845295 | -0.383985148 | 0.086487113 | 3.81E-06    | 4.20E-05    |
| C1GALT1        | 1278.62022  | 0.383891133  | 0.134015425 | 0.001629357 | 0.009040558 |
| EDC4           | 1023.79875  | -0.383867239 | 0.111897207 | 0.000247735 | 0.001766899 |
| MTMR9          | 282.6765667 | -0.383674807 | 0.135146234 | 0.001782227 | 0.009742056 |
| GRIN2D         | 121.0655425 | -0.383314309 | 0.230113157 | 0.030705052 | 0.099461165 |
| SLC41A1        | 723.6323234 | 0.383230665  | 0.098786699 | 4.35E-05    | 0.000379326 |
| POLL           | 238.9846338 | 0.383072226  | 0.151641905 | 0.004342681 | 0.020463184 |
| PABIR3         | 94.73343847 | 0.383024197  | 0.230634466 | 0.030823483 | 0.099751495 |
| RNF213         | 3060.90686  | 0.38300548   | 0.094015302 | 1.92E-05    | 0.000183215 |
| HADH           | 3118.329407 | -0.3830022   | 0.070856913 | 2.81E-08    | 4.67E-07    |
| LDLRAP1        | 3373.512967 | 0.382973737  | 0.07611071  | 2.07E-07    | 2.98E-06    |
| PIK3CD         | 153.5042868 | 0.382909244  | 0.184484396 | 0.01349601  | 0.051936359 |
| FAM171B        | 658.4632953 | 0.382816673  | 0.149124412 | 0.003881291 | 0.018644195 |
| POLR2C         | 3075.951425 | -0.382793808 | 0.083957286 | 2.21E-06    | 2.58E-05    |
| PTGES2         | 857.6733421 | 0.382726664  | 0.1118131   | 0.000251378 | 0.00179067  |
| ARL2BP         | 1560.869769 | -0.382671849 | 0.087906616 | 5.84E-06    | 6.19E-05    |
| PPCS           | 574.6966857 | 0.382594856  | 0.105543119 | 0.000118431 | 0.000920497 |
| IFIT2          | 228.5685506 | 0.382346424  | 0.151739679 | 0.004486401 | 0.021043066 |
| TMTC4          | 623.6954328 | -0.382193469 | 0.105704162 | 0.000123902 | 0.000958721 |
| GAS5           | 10207.49274 | -0.382139765 | 0.07109145  | 3.31E-08    | 5.46E-07    |
| DEF6           | 619.325718  | 0.382001869  | 0.113812145 | 0.000323895 | 0.002230177 |
| KYAT1          | 348.6210004 | 0.381915152  | 0.125064448 | 0.000908961 | 0.005478759 |
| OSBPL10        | 6.958464709 | -0.381783108 | 0.682405906 | 0.018899594 | 0.067704648 |
| PRXL2B         | 340.7295532 | 0.381663871  | 0.137085752 | 0.002113723 | 0.01124181  |
| CSPP1          | 360.0303576 | -0.381590502 | 0.125404153 | 0.000938509 | 0.005631378 |
| SEC61G         | 2621.584379 | -0.381588042 | 0.089647757 | 8.91E-06    | 9.06E-05    |
| LINC01215      | 101.2336459 | -0.38157618  | 0.212821049 | 0.024945212 | 0.084702216 |
| ZNF93          | 320.4267952 | 0.381434601  | 0.136085755 | 0.001978305 | 0.010642529 |
| DHRS4          | 472.8678492 | -0.381369367 | 0.109568154 | 0.000208336 | 0.001513958 |
| GPR132         | 380.0580611 | 0.381352794  | 0.138922822 | 0.002357497 | 0.012341223 |
| PPP1R9B        | 1162.52492  | 0.381289065  | 0.109851414 | 0.000212067 | 0.001538073 |
| THBS1          | 135.7050377 | 0.381054146  | 0.180418972 | 0.0126247   | 0.049095425 |
| QDPR           | 800.4412525 | -0.380906851 | 0.104597202 | 0.000114457 | 0.000894022 |
| ENY2           | 1808.732871 | -0.380819887 | 0.080663517 | 1.01E-06    | 1.27E-05    |
| UBL4A          | 1314.423369 | 0.380800827  | 0.091891704 | 1.45E-05    | 0.000141455 |
| GOLM1          | 1637.649541 | 0.380741924  | 0.080104456 | 8.55E-07    | 1.09E-05    |
| NOL9           | 415.6653172 | 0.380724914  | 0.15698341  | 0.005786344 | 0.025992768 |
| FANCE          | 309.6900005 | 0.380671092  | 0.133505026 | 0.00173063  | 0.00951105  |
| MRPS33         | 1605.062681 | -0.380664391 | 0.088040786 | 6.74E-06    | 7.05E-05    |

|                |             |              |             |             |             |
|----------------|-------------|--------------|-------------|-------------|-------------|
| SORD           | 1390.445212 | -0.380602558 | 0.08337792  | 2.15E-06    | 2.52E-05    |
| FIS1           | 1638.132838 | -0.380568919 | 0.093578807 | 2.04E-05    | 0.000192926 |
| C17orf58       | 204.6640173 | 0.380543481  | 0.148424085 | 0.00399589  | 0.019083515 |
| TRIM5          | 250.2904788 | 0.380507196  | 0.138648685 | 0.002384601 | 0.01244924  |
| TRAF3          | 1846.120401 | 0.380251692  | 0.084241806 | 2.71E-06    | 3.10E-05    |
| EIF4B          | 26437.32288 | -0.380220448 | 0.068729717 | 1.37E-08    | 2.36E-07    |
| GLE1           | 1818.334873 | 0.38011704   | 0.079110234 | 6.64E-07    | 8.68E-06    |
| POLR2M         | 753.9272361 | 0.380009836  | 0.127997762 | 0.001191695 | 0.006901869 |
| ISG15          | 257.0109724 | 0.379941245  | 0.164284724 | 0.007837991 | 0.033398252 |
| UNC13B         | 2004.80722  | -0.379858353 | 0.076747592 | 3.24E-07    | 4.51E-06    |
| NUDCD1         | 1313.773478 | -0.3796737   | 0.088842332 | 8.15E-06    | 8.38E-05    |
| ZNF160         | 376.5502197 | 0.379645944  | 0.123005095 | 0.000814909 | 0.004993549 |
| MALT1          | 2393.839447 | 0.379572027  | 0.112901074 | 0.000310164 | 0.002145867 |
| ZC2HC1A        | 248.6523988 | 0.379489287  | 0.178685726 | 0.012207562 | 0.047719719 |
| ARHGAP19-SLIT1 | 131.5557418 | 0.37933418   | 0.185648704 | 0.014720736 | 0.055502175 |
| LRRC45         | 112.7590901 | 0.37892366   | 0.198260907 | 0.019743253 | 0.070160868 |
| EIF2AK2        | 734.2850444 | 0.378891652  | 0.119988695 | 0.000644706 | 0.004073102 |
| ANKRD33B       | 2683.294863 | -0.378782991 | 0.077006798 | 3.80E-07    | 5.20E-06    |
| SIAH2          | 1695.572033 | -0.378766435 | 0.082128808 | 1.75E-06    | 2.10E-05    |
| NTMT1          | 963.0647585 | 0.378622617  | 0.117150508 | 0.000504954 | 0.003291875 |
| ZCCHC3         | 1703.834793 | -0.378542496 | 0.096680918 | 3.83E-05    | 0.000338896 |
| DENND4B        | 896.0241181 | -0.378535433 | 0.103293251 | 0.000105455 | 0.000833863 |
| SMARCAD1       | 2015.608507 | -0.378481546 | 0.093775229 | 2.31E-05    | 0.000216645 |
| COMMD3-BMI1    | 3254.595333 | 0.378453131  | 0.123476296 | 0.00087272  | 0.005282381 |
| TPT1           | 130508.3277 | -0.378352856 | 0.060801736 | 2.27E-10    | 5.14E-09    |
| RALGAPA2       | 323.2308212 | 0.378266018  | 0.126839504 | 0.001155143 | 0.006725103 |
| ACTR5          | 459.2352334 | 0.378137968  | 0.123902038 | 0.000921186 | 0.005542802 |
| ADO            | 947.6780752 | 0.378111281  | 0.096969282 | 4.09E-05    | 0.000359587 |
| ASPH           | 267.2617626 | -0.378079195 | 0.14395613  | 0.003436531 | 0.016896764 |
| IRF5           | 315.9331189 | 0.378047278  | 0.1299753   | 0.001461409 | 0.008212648 |
| BTD            | 333.2356081 | 0.378030857  | 0.130344215 | 0.001505344 | 0.008428078 |
| RPL10A         | 31683.6282  | -0.377972587 | 0.065024705 | 2.95E-09    | 5.76E-08    |
| IGLV3-1        | 9.792253757 | -0.377922834 | 0.610201601 | 0.030197703 | 0.098148202 |
| ATN1           | 433.3094968 | 0.377880142  | 0.137380803 | 0.002356284 | 0.012338605 |
| TRIM44         | 948.923944  | -0.377841432 | 0.089100808 | 9.56E-06    | 9.67E-05    |
| C9orf40        | 288.8793337 | 0.377828478  | 0.145451319 | 0.003658456 | 0.017759322 |
| IFI35          | 373.6588924 | 0.377666863  | 0.134234327 | 0.001963399 | 0.010572194 |
| NIPSNAP1       | 4270.909334 | -0.377611159 | 0.076590457 | 3.62E-07    | 5.00E-06    |
| RNASEH2C       | 1289.230903 | 0.377534944  | 0.105338334 | 0.000142235 | 0.001080297 |
| TRDC           | 4.384366669 | 0.377508604  | 0.752986744 | 0.008954443 | 0.037176718 |
| FASTKD5        | 2204.137658 | -0.377485519 | 0.079376056 | 8.69E-07    | 1.11E-05    |
| SRSF3P1        | 238.5970954 | -0.377450861 | 0.152430561 | 0.00520453  | 0.023874659 |
| EXTL2          | 220.5393633 | -0.377366658 | 0.158591379 | 0.006697488 | 0.029362126 |
| HASPIN         | 707.2762912 | 0.377333543  | 0.121678229 | 0.000790282 | 0.004865027 |
| RNF14          | 1548.213603 | 0.377235316  | 0.092786176 | 2.04E-05    | 0.000192793 |
| LIN9           | 381.9784668 | 0.377089556  | 0.128816075 | 0.001375051 | 0.007786711 |
| SCN4A          | 87.95025501 | 0.377072404  | 0.2218324   | 0.02994355  | 0.097595768 |
| SNX29          | 489.05375   | -0.376940244 | 0.118125221 | 0.000589836 | 0.003773252 |
| CEP19          | 158.405487  | 0.376871397  | 0.179113903 | 0.013014765 | 0.050386022 |
| FGF2           | 115.3032803 | -0.376636029 | 0.218504699 | 0.028609639 | 0.094278423 |

|              |             |              |             |             |             |
|--------------|-------------|--------------|-------------|-------------|-------------|
| IGFBP6       | 131.64842   | -0.376634791 | 0.189954908 | 0.017374051 | 0.063380333 |
| ALCAM        | 244.3618907 | 0.376616895  | 0.17440418  | 0.011396864 | 0.045276325 |
| PLEKHO1      | 2287.051692 | 0.376369692  | 0.108312509 | 0.000213824 | 0.001547345 |
| CTIF         | 358.0936899 | -0.376300229 | 0.138094418 | 0.002593223 | 0.013349239 |
| ESRRA        | 1321.295141 | 0.376299757  | 0.11818475  | 0.000600395 | 0.003832305 |
| SNUPN        | 394.1488198 | 0.376290468  | 0.121397167 | 0.000795768 | 0.004888372 |
| TFEB         | 367.7883508 | 0.37623866   | 0.128546598 | 0.001391493 | 0.007872093 |
| NUP210       | 11931.81376 | -0.37613886  | 0.084508863 | 3.77E-06    | 4.16E-05    |
| C16orf72     | 2362.676358 | -0.376129285 | 0.102500746 | 0.00010354  | 0.000821349 |
| KMT2A        | 1149.640535 | 0.375942568  | 0.114168418 | 0.000409456 | 0.002744018 |
| TRAPPC5      | 834.8093022 | 0.375843506  | 0.134963022 | 0.002163734 | 0.011486626 |
| ND4L         | 9309.83523  | -0.375757596 | 0.085256507 | 4.61E-06    | 5.01E-05    |
| VPS26B       | 3526.365632 | 0.375717145  | 0.073474609 | 1.38E-07    | 2.06E-06    |
| KRTCAP2      | 3872.414115 | -0.37570441  | 0.091838275 | 1.87E-05    | 0.000178832 |
| FKBP11       | 9846.578672 | -0.375551563 | 0.077297394 | 5.21E-07    | 6.96E-06    |
| NAV1         | 490.9557815 | -0.375424116 | 0.111093673 | 0.000304346 | 0.00211152  |
| AMDHD2       | 345.6523773 | -0.375398824 | 0.144444245 | 0.00375834  | 0.018114843 |
| EIF2D        | 1032.754935 | -0.375256311 | 0.08822271  | 9.22E-06    | 9.34E-05    |
| CYTH1        | 2315.66943  | 0.375102695  | 0.086408227 | 6.14E-06    | 6.48E-05    |
| SEC61B       | 5431.508153 | -0.375095762 | 0.074781149 | 2.39E-07    | 3.41E-06    |
| ELFN1-AS1    | 134.810523  | -0.374983582 | 0.184234524 | 0.015545933 | 0.057906843 |
| CGREF1       | 5.051817547 | -0.374973097 | 0.719888344 | 0.011686456 | 0.046069451 |
| TRANK1       | 426.499408  | 0.374947933  | 0.113224005 | 0.000387556 | 0.002612421 |
| ATP1B3       | 6359.662196 | -0.374714004 | 0.07614251  | 3.82E-07    | 5.22E-06    |
| DPY19L4      | 173.4488858 | 0.374699625  | 0.178491647 | 0.01321034  | 0.051040485 |
| KIF7         | 129.2951612 | -0.374567116 | 0.193288793 | 0.01917701  | 0.068528329 |
| COCH         | 795.8272892 | 0.374527322  | 0.097984254 | 5.68E-05    | 0.00048198  |
| ZBTB14       | 355.0038641 | 0.374437911  | 0.128736097 | 0.001475506 | 0.008287815 |
| BRWD3        | 252.7002128 | 0.374436752  | 0.194512991 | 0.019332601 | 0.068998897 |
| TIAM1        | 457.3585614 | 0.374388693  | 0.119334347 | 0.000699724 | 0.004372833 |
| RAB36        | 1781.99091  | 0.37433689   | 0.099753733 | 7.44E-05    | 0.000612496 |
| MTG1         | 279.635953  | 0.374301403  | 0.14637767  | 0.004203897 | 0.019939435 |
| NIPSNAP2     | 1504.457624 | -0.374291865 | 0.099782514 | 7.58E-05    | 0.000622914 |
| EXO5         | 155.9259054 | 0.374128825  | 0.165238285 | 0.009030158 | 0.037401398 |
| LOC84773     | 98.27700744 | -0.374068259 | 0.216467101 | 0.02908919  | 0.095585864 |
| ZHX1-C8orf76 | 229.6813524 | -0.373997414 | 0.150478045 | 0.005165603 | 0.023733813 |
| HNRNPA1P4    | 1139.189605 | -0.373899248 | 0.085312244 | 5.18E-06    | 5.56E-05    |
| DYNC1LI2     | 920.6187054 | -0.373776374 | 0.089810164 | 1.37E-05    | 0.000134748 |
| IFNAR1       | 3484.139187 | 0.373501576  | 0.095721153 | 4.08E-05    | 0.00035848  |
| SPA17        | 143.5622333 | 0.373478825  | 0.184236824 | 0.0156849   | 0.058361714 |
| EIF4A3       | 4272.854358 | -0.372848396 | 0.073189242 | 1.57E-07    | 2.31E-06    |
| CAPRIN2      | 132.9140067 | 0.372754024  | 0.181567361 | 0.014902724 | 0.056017032 |
| RPS18        | 91975.54393 | -0.372737588 | 0.065675699 | 5.83E-09    | 1.08E-07    |
| TMEM263      | 1176.096306 | -0.372728515 | 0.161885773 | 0.008288196 | 0.034895863 |
| FLOT1        | 1551.715484 | 0.372568279  | 0.080408064 | 1.58E-06    | 1.90E-05    |
| LMBR1L       | 530.5304537 | 0.372516581  | 0.124160638 | 0.001122498 | 0.006566992 |
| TFRC         | 23343.19087 | -0.37226881  | 0.073186929 | 1.65E-07    | 2.41E-06    |
| RASGRP2      | 437.1332126 | 0.372152963  | 0.129351708 | 0.001653572 | 0.009142693 |
| USP53        | 445.2010652 | -0.371499077 | 0.129993617 | 0.001760007 | 0.009638847 |
| TOR2A        | 420.9607453 | 0.371462893  | 0.149973634 | 0.005277913 | 0.024128201 |

|          |             |              |             |             |             |
|----------|-------------|--------------|-------------|-------------|-------------|
| PTGR2    | 188.630297  | -0.371369684 | 0.166431761 | 0.009926614 | 0.04054999  |
| FEZ2     | 484.9866211 | 0.371227211  | 0.119093632 | 0.00076287  | 0.004721451 |
| TRMT1    | 777.017879  | -0.371216028 | 0.10495097  | 0.000176081 | 0.001305306 |
| TUBB6    | 693.8772031 | 0.371156198  | 0.105482658 | 0.000185275 | 0.001366439 |
| ABL1     | 939.8955041 | 0.371073484  | 0.093399636 | 3.09E-05    | 0.000280212 |
| ATF6     | 4651.083971 | -0.371023825 | 0.068520558 | 2.77E-08    | 4.62E-07    |
| MRPL41   | 668.1353177 | 0.371011159  | 0.140774026 | 0.003413158 | 0.016800926 |
| PIH1D1   | 2165.539854 | 0.370928728  | 0.086290619 | 7.58E-06    | 7.84E-05    |
| DDX18    | 4438.83279  | -0.370876196 | 0.077479776 | 7.59E-07    | 9.80E-06    |
| ZNF318   | 277.9407869 | 0.370865057  | 0.132762671 | 0.002134498 | 0.011345333 |
| PDIA6    | 53531.34664 | -0.370855418 | 0.06411995  | 3.82E-09    | 7.33E-08    |
| RNMT     | 3359.644794 | -0.370822619 | 0.094489386 | 3.81E-05    | 0.000337211 |
| TBCCD1   | 532.0348292 | 0.370803708  | 0.108805329 | 0.000279595 | 0.001957841 |
| UROD     | 1307.409369 | -0.370681641 | 0.086140862 | 7.25E-06    | 7.53E-05    |
| SLC25A20 | 725.2348427 | -0.370627584 | 0.094222995 | 3.68E-05    | 0.000327007 |
| COPS2    | 2583.066751 | -0.370606061 | 0.109189617 | 0.000295544 | 0.002057045 |
| ZEB1     | 473.7292231 | -0.370484596 | 0.126362687 | 0.001403222 | 0.007933269 |
| NUDT22   | 478.7845396 | 0.370433501  | 0.149994775 | 0.005413865 | 0.024652092 |
| VSIR     | 503.7867518 | 0.370055805  | 0.115270294 | 0.000561804 | 0.003611269 |
| DDTL     | 266.1168607 | 0.370053768  | 0.166389565 | 0.010170051 | 0.041343537 |
| HIGD1A   | 4407.860366 | -0.369861749 | 0.112938648 | 0.000453919 | 0.003004781 |
| SYTL1    | 257.9823976 | -0.369756802 | 0.139189548 | 0.003231632 | 0.016081742 |
| BRD7     | 794.2020893 | -0.369612535 | 0.09347674  | 3.38E-05    | 0.000303693 |
| HAUS8    | 486.7506738 | 0.369461642  | 0.110943835 | 0.00036821  | 0.002495615 |
| DALRD3   | 410.5233267 | -0.369420145 | 0.12803889  | 0.001653035 | 0.009142641 |
| C9orf78  | 1927.297786 | 0.369254645  | 0.078053529 | 9.96E-07    | 1.25E-05    |
| DNAJA2   | 1660.434378 | -0.369236691 | 0.092326008 | 2.80E-05    | 0.000256454 |
| NDRG1    | 2579.169846 | 0.369105836  | 0.102252822 | 0.000131812 | 0.001013134 |
| DDA1     | 915.458765  | 0.369097876  | 0.090945737 | 2.18E-05    | 0.000205317 |
| AGAP2    | 301.6927287 | 0.368879625  | 0.129495864 | 0.001821952 | 0.009921416 |
| BRI3     | 638.792986  | -0.368838607 | 0.124404975 | 0.001286493 | 0.007344107 |
| EIF5B    | 2321.597539 | -0.368566192 | 0.094148828 | 3.98E-05    | 0.000350849 |
| MTBP     | 222.522255  | -0.3685632   | 0.156598123 | 0.007482754 | 0.032153562 |
| RFX3     | 130.6139733 | 0.36851091   | 0.192223818 | 0.020340693 | 0.07185634  |
| PSMD7    | 4450.732776 | -0.368315012 | 0.067890244 | 2.65E-08    | 4.42E-07    |
| APOBEC3B | 2568.430421 | 0.368122802  | 0.078923023 | 1.38E-06    | 1.69E-05    |
| MED25    | 749.3255048 | 0.368050672  | 0.13265634  | 0.002308047 | 0.012126351 |
| PGRMC1   | 2209.663014 | -0.367935967 | 0.094865061 | 4.68E-05    | 0.000404943 |
| HSP90AA1 | 38398.1978  | -0.367916983 | 0.067983915 | 3.14E-08    | 5.19E-07    |
| NACA2    | 228.1556829 | -0.367515388 | 0.214517953 | 0.030844401 | 0.09977564  |
| KICS2    | 397.0500944 | 0.367496426  | 0.131984774 | 0.002232406 | 0.011786149 |
| TMBIM6   | 29949.03538 | 0.36743191   | 0.069833855 | 6.34E-08    | 9.94E-07    |
| ZBTB10   | 376.8234787 | -0.367331582 | 0.165214686 | 0.010276873 | 0.041736542 |
| RPL13    | 54864.63958 | -0.367159273 | 0.105164098 | 0.000274679 | 0.001927319 |
| PCID2    | 1695.747163 | -0.367123344 | 0.079512202 | 1.77E-06    | 2.12E-05    |
| COG5     | 1056.235743 | -0.367110395 | 0.086009697 | 8.84E-06    | 9.00E-05    |
| MAT2B    | 2729.250756 | 0.367064278  | 0.111813764 | 0.000458164 | 0.003028254 |
| RAD50    | 472.0071172 | -0.366945709 | 0.116493736 | 0.000702607 | 0.004387684 |
| TCAIM    | 405.2094873 | -0.366906506 | 0.124024072 | 0.001310997 | 0.007463028 |
| NUDT21   | 4081.085381 | -0.366888703 | 0.110015815 | 0.000370866 | 0.002510232 |



|              |             |              |             |             |             |
|--------------|-------------|--------------|-------------|-------------|-------------|
| DLGAP5       | 1213.780617 | 0.366829943  | 0.09711586  | 6.95E-05    | 0.000576898 |
| CCDC137      | 402.6962495 | 0.366740894  | 0.125150966 | 0.001426873 | 0.008048585 |
| KLF3         | 1285.141912 | -0.366697516 | 0.118327712 | 0.000835104 | 0.005090286 |
| OAT          | 6677.120456 | -0.366575121 | 0.089612867 | 1.93E-05    | 0.00018367  |
| SYNE2        | 163.0242258 | 0.366561523  | 0.177297818 | 0.014783701 | 0.055678414 |
| HLA-K        | 163.7042606 | 0.366435365  | 0.164028393 | 0.010087799 | 0.041076248 |
| KLHL30       | 7.870397318 | -0.366408895 | 0.619073405 | 0.024965357 | 0.084736395 |
| PLD3         | 3083.852374 | -0.366380369 | 0.101650571 | 0.000138117 | 0.001054576 |
| ATG4D        | 519.387687  | 0.366191595  | 0.128199833 | 0.001801351 | 0.009831071 |
| LY75-CD302   | 533.6799475 | 0.366117586  | 0.103967695 | 0.000185523 | 0.001367691 |
| PSMB8        | 3636.426104 | 0.366112051  | 0.074308246 | 3.79E-07    | 5.19E-06    |
| OGFR         | 536.4784761 | 0.366063169  | 0.106439405 | 0.00025445  | 0.001807343 |
| ARHGEF39     | 101.4815555 | 0.365997014  | 0.207893352 | 0.028234    | 0.093253515 |
| AMIGO3       | 142.3812008 | -0.365936534 | 0.187912582 | 0.019624847 | 0.069836418 |
| LOC105371675 | 237.5785721 | 0.365896031  | 0.159849583 | 0.008731054 | 0.036402273 |
| GPBP1        | 3402.82281  | -0.365894154 | 0.085191669 | 7.87E-06    | 8.12E-05    |
| TPCN1        | 658.5811112 | -0.365884416 | 0.110600843 | 0.000412402 | 0.002758429 |
| TCEANC2      | 243.8855925 | 0.36579741   | 0.140138304 | 0.0037005   | 0.017897299 |
| ND4          | 73425.73895 | -0.36570347  | 0.091490817 | 2.88E-05    | 0.000263625 |
| PPT1         | 9800.896171 | -0.365699887 | 0.065298904 | 1.00E-08    | 1.79E-07    |
| GCOM1        | 713.1309119 | 0.365629417  | 0.131615379 | 0.002310519 | 0.012135658 |
| RPSAP17      | 390.6850447 | -0.365526719 | 0.127343447 | 0.001759053 | 0.009638847 |
| RHOG         | 705.2912282 | 0.365462345  | 0.107685946 | 0.000301523 | 0.002093284 |
| GMPR2        | 1046.656723 | -0.365386295 | 0.085495678 | 8.68E-06    | 8.86E-05    |
| TMEM143      | 258.7208233 | -0.365361071 | 0.135718    | 0.002997977 | 0.015065572 |
| CBX7         | 144.6703419 | 0.365300377  | 0.182346466 | 0.017253245 | 0.062992715 |
| RN7SL2       | 1160.639719 | 0.365293612  | 0.903678783 | 1.58E-06    | 1.90E-05    |
| AZIN1        | 6430.424314 | -0.364973963 | 0.083611023 | 5.76E-06    | 6.13E-05    |
| CAMKMT       | 305.6545907 | -0.36494831  | 0.139822441 | 0.003765291 | 0.01814233  |
| TGFB1        | 3849.368984 | -0.364697884 | 0.094013794 | 4.85E-05    | 0.000417427 |
| RPGR         | 144.4117365 | 0.364620912  | 0.17329522  | 0.01379346  | 0.052833743 |
| HNRNPA1L3    | 2821.795122 | -0.364542047 | 0.080045624 | 2.38E-06    | 2.76E-05    |
| EDF1         | 3400.315166 | 0.364500178  | 0.077403656 | 1.13E-06    | 1.40E-05    |
| CLN8         | 263.2924893 | -0.364498202 | 0.136933383 | 0.003259313 | 0.016188289 |
| RGS10        | 752.1457132 | -0.364350675 | 0.113651721 | 0.000592207 | 0.003787017 |
| SREK1        | 975.8373627 | -0.364314785 | 0.117725145 | 0.000851789 | 0.00517559  |
| TSR3         | 696.2579648 | -0.364250854 | 0.152851788 | 0.007054576 | 0.030655983 |
| UTP23        | 1005.668528 | -0.364237272 | 0.121809542 | 0.001196038 | 0.006924706 |
| PRRC2C       | 2488.984012 | -0.364219564 | 0.127700427 | 0.001856177 | 0.010082627 |
| LOC284685    | 174.533985  | 0.363965852  | 0.163050991 | 0.010176683 | 0.041358745 |
| TBCK         | 221.4373354 | -0.36376485  | 0.143900968 | 0.004788942 | 0.022275076 |
| DCAF16       | 263.8967787 | 0.36373959   | 0.140786935 | 0.004071142 | 0.0193841   |
| RASSF8       | 194.1014835 | 0.363535537  | 0.17645303  | 0.015212168 | 0.056933027 |
| STIM1        | 2488.925636 | 0.363526305  | 0.087731355 | 1.53E-05    | 0.000148807 |
| PLEKHA3      | 677.2412113 | 0.363254632  | 0.112247491 | 0.00052474  | 0.003403344 |
| DGUOK-AS1    | 313.816533  | -0.363197386 | 0.138462109 | 0.003684476 | 0.017842303 |
| HNRNPA1P10   | 3671.264355 | -0.363007623 | 0.073536381 | 3.68E-07    | 5.06E-06    |
| UNC5C        | 7.20799091  | 0.362804416  | 0.609378274 | 0.025345804 | 0.085792276 |
| MAPKAP1      | 2380.895094 | 0.362786166  | 0.084521094 | 8.00E-06    | 8.24E-05    |
| RPL10        | 67404.68504 | -0.362581739 | 0.105980284 | 0.000203788 | 0.001485424 |

|               |             |              |             |             |             |
|---------------|-------------|--------------|-------------|-------------|-------------|
| KCTD5         | 1203.553265 | -0.362554214 | 0.093036838 | 4.43E-05    | 0.00038592  |
| MAF1          | 2211.987954 | 0.362510783  | 0.099904327 | 0.000126807 | 0.000978573 |
| MSL3P1        | 214.6743421 | 0.362473712  | 0.145472979 | 0.005271928 | 0.02411994  |
| CDKL5         | 201.9705107 | 0.362462114  | 0.176087225 | 0.015360595 | 0.057376926 |
| SHCBP1        | 2031.760159 | -0.362376421 | 0.074043737 | 4.59E-07    | 6.17E-06    |
| RCHY1         | 578.3691601 | -0.362297467 | 0.132077511 | 0.002596032 | 0.013359729 |
| RPS2P7        | 680.82986   | -0.36219734  | 0.166836432 | 0.012054332 | 0.047184644 |
| HNRNPA1P38    | 163.2298412 | -0.36213342  | 0.166935055 | 0.012132582 | 0.047469479 |
| ADK           | 1622.250872 | -0.362108316 | 0.079071867 | 2.16E-06    | 2.53E-05    |
| TMSB4XP8      | 6268.48525  | 0.361939589  | 0.095829103 | 6.99E-05    | 0.000579717 |
| FNBP4         | 862.9870144 | -0.361912371 | 0.104048545 | 0.000224534 | 0.001619429 |
| USF2          | 2452.378259 | 0.361865155  | 0.086656903 | 1.34E-05    | 0.000131966 |
| SPRY1         | 266.861539  | 0.361636806  | 0.142798167 | 0.004735716 | 0.022068997 |
| SPATS2L       | 693.4950689 | 0.361470681  | 0.100905711 | 0.000151792 | 0.00114535  |
| RRP1B         | 3519.625957 | -0.361432976 | 0.072804481 | 3.20E-07    | 4.46E-06    |
| ZBTB34        | 338.4241991 | 0.36137398   | 0.144968864 | 0.00525688  | 0.024073722 |
| P2RX5-TAX1BP3 | 738.5889196 | -0.361351119 | 0.099534457 | 0.000128381 | 0.000989834 |
| GGH           | 3371.535791 | -0.361293796 | 0.093136894 | 4.87E-05    | 0.000418598 |
| QARS1         | 7879.140383 | -0.361276172 | 0.069523562 | 9.72E-08    | 1.47E-06    |
| CRLF3         | 802.8246543 | 0.36118378   | 0.113257567 | 0.000622758 | 0.003954639 |
| RHOT2         | 742.185457  | -0.361174786 | 0.10554327  | 0.000279098 | 0.001955154 |
| ATP8B2        | 6414.501973 | -0.361092915 | 0.080334328 | 3.18E-06    | 3.57E-05    |
| SSB           | 4699.728649 | -0.360999535 | 0.085105436 | 1.02E-05    | 0.000102719 |
| RPL39L        | 284.0892403 | 0.360944064  | 0.146926496 | 0.005857272 | 0.026256893 |
| CDR2          | 931.8369673 | -0.360859383 | 0.087651921 | 1.76E-05    | 0.000169476 |
| ATP11A        | 1299.844384 | 0.360856774  | 0.094442474 | 5.95E-05    | 0.000502627 |
| ASAP1         | 845.3803658 | 0.360768538  | 0.112232128 | 0.000570628 | 0.003665269 |
| RNF4          | 1678.469086 | 0.3607279    | 0.075989446 | 9.53E-07    | 1.21E-05    |
| METTL22       | 375.1635823 | -0.360588057 | 0.144667965 | 0.005369834 | 0.02447734  |
| EEF1A1P9      | 3684.997982 | -0.360537525 | 0.073064984 | 3.77E-07    | 5.17E-06    |
| HOMER3        | 6717.309568 | 0.360366862  | 0.086235197 | 1.34E-05    | 0.000131925 |
| FAHD2A        | 1267.35138  | -0.360311055 | 0.082819766 | 6.27E-06    | 6.60E-05    |
| ALDOB         | 5.302881371 | 0.360136533  | 0.697312208 | 0.008503557 | 0.035618594 |
| PIM1          | 929.4069624 | 0.360037602  | 0.094254375 | 6.05E-05    | 0.000510928 |
| LYSMD1        | 188.1605758 | -0.360027386 | 0.152435062 | 0.007528972 | 0.032296065 |
| SMAD7         | 305.0872086 | 0.359898875  | 0.130553585 | 0.002490049 | 0.012925712 |
| CARD19        | 310.3966191 | 0.359837787  | 0.139177108 | 0.004126573 | 0.019621049 |
| FKBP14        | 278.5233226 | -0.359761059 | 0.156945459 | 0.008951329 | 0.037176718 |
| NBAS          | 4293.07837  | -0.359717226 | 0.06608433  | 2.46E-08    | 4.13E-07    |
| GALNT3        | 1420.367536 | -0.359622643 | 0.122508562 | 0.001458131 | 0.008200861 |
| CDKN3         | 1237.684012 | 0.359606714  | 0.090668154 | 3.29E-05    | 0.000296957 |
| HEMK1         | 291.7667887 | -0.359503475 | 0.132850861 | 0.002948001 | 0.014848902 |
| GRAMD1A       | 549.5988909 | -0.359206508 | 0.121243985 | 0.001343326 | 0.007622012 |
| HK1           | 740.4028471 | 0.358990248  | 0.09861074  | 0.000122957 | 0.000952681 |
| PHKA1         | 693.0347696 | -0.358986081 | 0.095564426 | 7.91E-05    | 0.000646363 |
| CLN5          | 630.0825396 | -0.35897183  | 0.10354477  | 0.000237531 | 0.001702536 |
| GNG7          | 2544.639959 | -0.358712233 | 0.081309104 | 4.80E-06    | 5.19E-05    |
| UPF3B         | 270.5926172 | 0.358686797  | 0.147363924 | 0.00621847  | 0.0276116   |
| PPP2R5B       | 127.2768152 | 0.358663447  | 0.194977169 | 0.025114425 | 0.085175576 |
| CAMSAP3       | 151.1535364 | 0.35852374   | 0.18452062  | 0.020220718 | 0.071549279 |

|              |             |              |             |             |             |
|--------------|-------------|--------------|-------------|-------------|-------------|
| DPCD         | 465.5696483 | -0.358431404 | 0.12256629  | 0.001528786 | 0.008537243 |
| EIF4BP6      | 4042.9161   | -0.358137526 | 0.086613479 | 1.64E-05    | 0.000159129 |
| VPS13B       | 236.6426164 | -0.358131949 | 0.14410401  | 0.005478029 | 0.02485277  |
| ALPK1        | 110.7493073 | 0.358034192  | 0.198068779 | 0.026604302 | 0.089163285 |
| TOB2         | 623.1798273 | -0.357816871 | 0.098841802 | 0.000135086 | 0.001033255 |
| HTD2         | 523.5337384 | -0.35781081  | 0.105167666 | 0.000301596 | 0.002093284 |
| LCP1         | 31319.03917 | 0.357788974  | 0.060279981 | 1.38E-09    | 2.84E-08    |
| IFT140       | 127.6502856 | -0.357683577 | 0.17987478  | 0.018560076 | 0.066806244 |
| RCC2         | 9436.952024 | 0.357672049  | 0.07461877  | 7.65E-07    | 9.87E-06    |
| NOLC1        | 6753.221282 | -0.35764913  | 0.070923012 | 2.24E-07    | 3.21E-06    |
| FBR5         | 1050.024855 | -0.357607611 | 0.116403643 | 0.000947355 | 0.005678556 |
| LY75         | 640.7884341 | 0.357545059  | 0.110050058 | 0.000514052 | 0.003346556 |
| LOC101927297 | 256.6622374 | -0.35752656  | 0.169467976 | 0.014053415 | 0.053556995 |
| CAPN7        | 1048.824459 | -0.357297138 | 0.091554792 | 4.36E-05    | 0.000380232 |
| ZNF581       | 438.5973207 | -0.357285654 | 0.151237816 | 0.007688003 | 0.032888623 |
| SLF2         | 620.1197556 | 0.356829829  | 0.111626735 | 0.000618162 | 0.003932661 |
| HSPD1        | 41155.01915 | -0.356578341 | 0.064063448 | 1.29E-08    | 2.25E-07    |
| GMIP         | 299.4488442 | 0.356331503  | 0.143558021 | 0.00556495  | 0.025188299 |
| ZDHHC13      | 569.6142213 | 0.356310285  | 0.113771176 | 0.000770382 | 0.004757741 |
| RPSAP3       | 547.7858995 | -0.356302193 | 0.118942191 | 0.001228597 | 0.007065964 |
| AKTIP        | 199.9532735 | 0.356209764  | 0.149834969 | 0.007305494 | 0.031541597 |
| RSPO2        | 5.00839269  | -0.35612044  | 0.661483995 | 0.012800188 | 0.049632972 |
| SLC25A26     | 686.9689812 | -0.356111595 | 0.107315315 | 0.000412975 | 0.002761194 |
| MPZL1        | 4772.357239 | -0.356080765 | 0.073031661 | 5.12E-07    | 6.84E-06    |
| RIOX1        | 328.8212345 | 0.356060752  | 0.122002481 | 0.001548486 | 0.008636113 |
| RPS17P16     | 2130.783229 | -0.35596155  | 0.090146368 | 3.65E-05    | 0.000325035 |
| PSMD6        | 2558.375926 | -0.355929341 | 0.077015207 | 1.80E-06    | 2.15E-05    |
| ARG2         | 121.6127758 | 0.355901164  | 0.188941935 | 0.023127158 | 0.079763593 |
| ZNF764       | 145.8072789 | -0.355890872 | 0.181596104 | 0.019889116 | 0.070606768 |
| SEPTIN6      | 4389.746934 | 0.355777573  | 0.072867053 | 4.96E-07    | 6.63E-06    |
| RNF31        | 440.5165491 | 0.355460747  | 0.131593634 | 0.003000927 | 0.015076024 |
| CARS2        | 1124.80499  | -0.355327446 | 0.097198587 | 0.000119082 | 0.00092514  |
| RPL21        | 26983.87862 | -0.355201146 | 0.074415669 | 8.61E-07    | 1.10E-05    |
| FUS          | 6924.639877 | -0.355180616 | 0.067485334 | 6.78E-08    | 1.06E-06    |
| AMACR        | 188.3338871 | -0.355163552 | 0.159954918 | 0.01100605  | 0.044006413 |
| LOC124903625 | 8.05136022  | -0.355153583 | 0.643730809 | 0.014545164 | 0.054983323 |
| ABHD14B      | 1592.467836 | -0.355139329 | 0.118643917 | 0.001241062 | 0.007124201 |
| PDE12        | 2158.604793 | -0.354963467 | 0.118039566 | 0.001196951 | 0.006927672 |
| CYB5A        | 918.0091907 | 0.354934337  | 0.090934221 | 4.39E-05    | 0.000382592 |
| ILKAP        | 1198.147151 | 0.354861251  | 0.085219916 | 1.45E-05    | 0.000141461 |
| ZBTB43       | 915.5898059 | 0.354845388  | 0.095573723 | 9.39E-05    | 0.000752536 |
| ZNF737       | 170.1377413 | 0.354662208  | 0.19653036  | 0.027059984 | 0.090253803 |
| EIF3L        | 14660.4389  | -0.354653813 | 0.074856162 | 1.01E-06    | 1.27E-05    |
| ZNF791       | 696.6122075 | 0.354580562  | 0.114143467 | 0.000841774 | 0.005123725 |
| EIF4BP7      | 2953.302618 | -0.354342285 | 0.078241259 | 2.80E-06    | 3.19E-05    |
| OXCT1        | 5949.189931 | -0.354300974 | 0.072462735 | 4.87E-07    | 6.52E-06    |
| PYCR1        | 4174.472333 | -0.354268304 | 0.09314509  | 6.74E-05    | 0.000561929 |
| ZBTB8A       | 163.1541598 | 0.354227697  | 0.185863677 | 0.022130536 | 0.077109557 |
| SLC35E3      | 618.1348026 | 0.354154817  | 0.109170965 | 0.000532334 | 0.003443532 |
| ZNF266       | 606.736942  | 0.354153683  | 0.100812914 | 0.000203018 | 0.001480906 |

|          |             |              |             |             |             |
|----------|-------------|--------------|-------------|-------------|-------------|
| GTPBP3   | 947.8654115 | -0.354119474 | 0.127752783 | 0.002480335 | 0.012883013 |
| PUDP     | 520.2601326 | -0.354044197 | 0.107221297 | 0.000440839 | 0.002926029 |
| RAB2A    | 1903.440378 | -0.354004198 | 0.110406744 | 0.00061081  | 0.003890179 |
| ATP6VOA1 | 2428.462943 | 0.353982938  | 0.073025887 | 5.93E-07    | 7.83E-06    |
| RPL21P28 | 1788.900763 | -0.35380068  | 0.079011474 | 3.60E-06    | 4.00E-05    |
| LEMD3    | 1716.593009 | 0.35363166   | 0.109215096 | 0.000542326 | 0.003495144 |
| ALKBH6   | 273.160872  | 0.353550362  | 0.141241324 | 0.005298075 | 0.024201205 |
| POLR3K   | 847.2581314 | -0.353291746 | 0.098120891 | 0.000147463 | 0.00111707  |
| NUB1     | 878.0353427 | 0.353074696  | 0.09269287  | 6.46E-05    | 0.000540829 |
| RPP14    | 539.7054273 | -0.353071331 | 0.104422311 | 0.000330701 | 0.002272521 |
| RPS2P20  | 710.8974916 | -0.35306396  | 0.150254093 | 0.008122619 | 0.034357449 |
| RAD23A   | 2918.052046 | 0.353055593  | 0.078127015 | 2.92E-06    | 3.30E-05    |
| UBALD2   | 2018.711886 | 0.352978353  | 0.090550764 | 4.52E-05    | 0.000392476 |
| CMC2     | 1957.653338 | -0.352799064 | 0.080133802 | 5.12E-06    | 5.50E-05    |
| SH3BGRL3 | 1400.570897 | 0.352183642  | 0.094518099 | 9.04E-05    | 0.000726908 |
| TESC     | 1006.207345 | -0.352051693 | 0.118064707 | 0.001312215 | 0.007467509 |
| SRM      | 4056.437611 | -0.352016576 | 0.103935057 | 0.000327928 | 0.002256019 |
| CETN2    | 920.2562193 | -0.351964067 | 0.086692684 | 2.33E-05    | 0.000217838 |
| PINX1    | 872.7364676 | -0.351907745 | 0.091641776 | 5.80E-05    | 0.00049136  |
| HACD2    | 1878.762259 | -0.351554341 | 0.094340108 | 9.12E-05    | 0.000732587 |
| RPSAP14  | 211.5591731 | -0.351543317 | 0.148089905 | 0.007577244 | 0.032470957 |
| RAB5C    | 2458.578966 | 0.351342962  | 0.079337751 | 4.53E-06    | 4.93E-05    |
| DGKD     | 2276.022343 | 0.351292227  | 0.091180771 | 5.47E-05    | 0.000466635 |
| UBXN8    | 563.9589869 | -0.351231808 | 0.115102049 | 0.001037023 | 0.006128303 |
| SGCB     | 331.7102656 | 0.350960553  | 0.150707895 | 0.008425125 | 0.035352044 |
| MYCBP2   | 2045.525323 | -0.350716185 | 0.086548113 | 2.40E-05    | 0.000223451 |
| SPATA20  | 901.4954466 | 0.35068102   | 0.123771375 | 0.002070254 | 0.011039782 |
| MAP3K14  | 1161.994411 | 0.350679332  | 0.110260333 | 0.000672446 | 0.00421928  |
| NKIRAS2  | 1073.425318 | 0.350573429  | 0.096251137 | 0.000125727 | 0.000971972 |
| MBD1     | 1761.60588  | 0.350463828  | 0.090120193 | 4.71E-05    | 0.000407576 |
| NDUFB10  | 1771.221592 | -0.350422544 | 0.078075573 | 3.47E-06    | 3.86E-05    |
| TRMT2B   | 597.8356834 | 0.350309842  | 0.101019341 | 0.000243805 | 0.001742455 |
| REXO5    | 145.8950393 | -0.350247422 | 0.197267124 | 0.029855615 | 0.097438691 |
| HSPE1    | 5405.900538 | -0.350128849 | 0.069115595 | 1.98E-07    | 2.85E-06    |
| NAPA-AS1 | 137.8394103 | -0.349849003 | 0.19599002  | 0.029110138 | 0.095634128 |
| TMF1     | 976.7346189 | -0.349790616 | 0.103759164 | 0.000347376 | 0.00236645  |
| TUBB4B   | 14798.6297  | 0.349781334  | 0.074909571 | 1.42E-06    | 1.73E-05    |
| CENPW    | 624.0113499 | 0.34978128   | 0.107316326 | 0.00051672  | 0.0033614   |
| PPM1H    | 544.8246803 | -0.349736941 | 0.111710789 | 0.000802021 | 0.004923289 |
| JTB      | 9207.27148  | -0.349729346 | 0.109620195 | 0.000658296 | 0.004148219 |
| YIPF5    | 2186.882478 | -0.349652497 | 0.089227812 | 4.14E-05    | 0.000362665 |
| HNRNPA1  | 34723.91696 | -0.349644528 | 0.070639314 | 3.66E-07    | 5.04E-06    |
| PSIP1    | 1965.706078 | 0.349630548  | 0.113442746 | 0.000956199 | 0.00572562  |
| HSD17B8  | 860.3363167 | -0.34952068  | 0.103514093 | 0.000345917 | 0.00235929  |
| HINT2    | 676.0018135 | 0.349468774  | 0.128980821 | 0.003067645 | 0.015375515 |
| SNORD77  | 7.925312596 | -0.349460523 | 0.595055271 | 0.022886661 | 0.079170658 |
| AGPAT3   | 1415.594228 | 0.349326448  | 0.097326468 | 0.000155194 | 0.001167971 |
| RPSAP12  | 4444.422419 | -0.349246683 | 0.082053821 | 1.00E-05    | 0.00010099  |
| ATRIP    | 161.125037  | -0.349145179 | 0.176375781 | 0.019695325 | 0.070004914 |
| TSC2D4   | 563.8534113 | 0.34906082   | 0.126682106 | 0.002630495 | 0.013492973 |

|              |             |              |             |             |             |
|--------------|-------------|--------------|-------------|-------------|-------------|
| TRMT12       | 263.1818722 | -0.348983654 | 0.140474688 | 0.005765846 | 0.025914133 |
| SYNJ2        | 462.2835898 | 0.348916533  | 0.113982897 | 0.001002673 | 0.005958573 |
| CNPY3-GNMT   | 275.4012973 | 0.348871718  | 0.135155464 | 0.004360619 | 0.020530951 |
| PSAT1        | 7254.758118 | 0.348742831  | 0.066293405 | 6.95E-08    | 1.08E-06    |
| LPIN1        | 3904.979442 | 0.348633932  | 0.07147913  | 5.05E-07    | 6.76E-06    |
| EPRS1        | 6822.042748 | -0.348316997 | 0.074252592 | 1.32E-06    | 1.62E-05    |
| TPO          | 474.0977667 | 0.348195656  | 0.125225012 | 0.002425145 | 0.012645659 |
| EZH1         | 372.3737903 | 0.348122263  | 0.122560934 | 0.002038699 | 0.01090307  |
| AKAP12       | 3.90462585  | 0.34809998   | 0.702214449 | 0.00292604  | 0.014759753 |
| TSC2         | 467.9880186 | -0.347990694 | 0.116633116 | 0.00131034  | 0.00746174  |
| STK11        | 895.7614177 | 0.347935412  | 0.105850777 | 0.000470763 | 0.003096168 |
| PPIB         | 18764.98135 | -0.347933719 | 0.062636131 | 1.38E-08    | 2.38E-07    |
| CENPB        | 1664.273121 | 0.347719092  | 0.113339424 | 0.000990813 | 0.005900241 |
| EIF2S3B      | 659.6336723 | -0.347693857 | 0.107574153 | 0.000571124 | 0.003667095 |
| CTH          | 410.4194494 | -0.347689424 | 0.11399803  | 0.001062127 | 0.006260331 |
| PIGBOS1      | 242.2180747 | 0.34761809   | 0.145368699 | 0.007266561 | 0.031427331 |
| YJU2         | 661.8648803 | 0.347611989  | 0.11417507  | 0.001069133 | 0.006293055 |
| BBS7         | 417.3858404 | -0.347553822 | 0.117551895 | 0.001426348 | 0.008048244 |
| ZNF641       | 340.6831414 | 0.347327618  | 0.127152737 | 0.002823882 | 0.014374242 |
| CYP1A1       | 5.15733928  | 0.34732003   | 0.631286064 | 0.014286336 | 0.054241718 |
| ARSB         | 500.987664  | -0.347319893 | 0.112069777 | 0.000903854 | 0.005449872 |
| SOHLH1       | 986.8377559 | 0.347265695  | 0.120916102 | 0.001855857 | 0.010082627 |
| LOC202319    | 183.5265936 | -0.347213332 | 0.17215782  | 0.018437123 | 0.066432723 |
| F8A1         | 229.6412137 | 0.347153838  | 0.156355012 | 0.011293588 | 0.044969201 |
| NCF1C        | 7.390197312 | 0.346997589  | 0.573537992 | 0.029562755 | 0.096646826 |
| PML          | 385.9853563 | 0.346811694  | 0.121754759 | 0.002003524 | 0.010738171 |
| CIAO3        | 157.398723  | -0.346754078 | 0.170242515 | 0.017608481 | 0.064073559 |
| TBC1D24      | 156.057628  | -0.346747557 | 0.174929826 | 0.019897008 | 0.070620308 |
| PSMG3        | 1025.236996 | -0.346692309 | 0.099446541 | 0.000232944 | 0.001675202 |
| LRPPRC       | 14216.82601 | -0.346588696 | 0.063300187 | 2.16E-08    | 3.66E-07    |
| BROX         | 514.072093  | 0.346509221  | 0.164852226 | 0.014920341 | 0.056046756 |
| MEA1         | 1413.207573 | 0.34643403   | 0.084939653 | 2.16E-05    | 0.000203708 |
| LIMS1        | 2313.334217 | 0.34641676   | 0.148179955 | 0.008292656 | 0.034906155 |
| TRIOBP       | 119.8411792 | 0.34640929   | 0.192436936 | 0.028609498 | 0.094278423 |
| LONP2        | 1391.49574  | -0.3462878   | 0.08040707  | 8.11E-06    | 8.35E-05    |
| IL12RB1      | 713.664823  | 0.346240477  | 0.106219265 | 0.000521283 | 0.003384724 |
| NCBP2AS2     | 465.0421987 | 0.346126545  | 0.128712509 | 0.003234151 | 0.016088996 |
| SWI5         | 453.1551365 | 0.346055795  | 0.114144392 | 0.001117566 | 0.006542558 |
| RAB33B       | 247.8443593 | -0.345786823 | 0.167527111 | 0.01638075  | 0.060320761 |
| LUC7L3       | 1838.427468 | -0.345564293 | 0.092940964 | 9.60E-05    | 0.000767823 |
| LOC100130394 | 740.6332605 | -0.345457641 | 0.102045315 | 0.000339371 | 0.00232377  |
| AKT1         | 1580.966387 | 0.345360443  | 0.096934931 | 0.000174576 | 0.001296924 |
| SUMF1        | 373.6189573 | -0.345311483 | 0.117338343 | 0.001516483 | 0.008479477 |
| ABCB10       | 599.7212825 | -0.344983136 | 0.127926628 | 0.00318999  | 0.015919611 |
| RBM25        | 1837.781528 | -0.344949036 | 0.097147863 | 0.000183013 | 0.001352642 |
| TEP1         | 162.6703344 | 0.344941474  | 0.174588916 | 0.020011388 | 0.070953565 |
| ASB6         | 748.9725579 | 0.344865831  | 0.119649952 | 0.001815699 | 0.009890677 |
| COX2         | 78648.49705 | -0.344692329 | 0.080453877 | 8.78E-06    | 8.95E-05    |
| DPH5         | 659.2321788 | -0.344684044 | 0.099612851 | 0.000257333 | 0.001821788 |
| IKBKG        | 390.1022925 | 0.344640158  | 0.116270757 | 0.001405898 | 0.0079458   |

|              |             |              |             |             |             |
|--------------|-------------|--------------|-------------|-------------|-------------|
| EML1         | 147.0398553 | -0.344485817 | 0.175203529 | 0.020840059 | 0.073380906 |
| RNF19B       | 605.1535003 | 0.344341753  | 0.106503757 | 0.000573733 | 0.003682483 |
| SCRN1        | 566.1757625 | 0.34430982   | 0.105722109 | 0.000532528 | 0.003443532 |
| DDX31        | 769.917454  | 0.344289187  | 0.091583591 | 8.16E-05    | 0.000663834 |
| GPAT4        | 1997.82561  | -0.34423186  | 0.07753602  | 4.44E-06    | 4.84E-05    |
| TTC7A        | 1150.517618 | 0.344150925  | 0.096006065 | 0.000160297 | 0.001202196 |
| BUB1         | 2802.274646 | 0.343921298  | 0.073184612 | 1.27E-06    | 1.56E-05    |
| CYTB         | 29584.55861 | -0.343321826 | 0.089831881 | 6.40E-05    | 0.000537144 |
| TTK          | 1283.281695 | 0.34328982   | 0.104252678 | 0.000467039 | 0.003078686 |
| TPST2        | 2345.443941 | 0.343263448  | 0.097069264 | 0.000191995 | 0.00141     |
| FAHD2B       | 827.9468242 | -0.343196787 | 0.096417851 | 0.000179632 | 0.001329921 |
| SKA3         | 1137.410487 | 0.343187918  | 0.090984851 | 7.77E-05    | 0.00063635  |
| MRPS27       | 3576.989165 | -0.34282781  | 0.069331654 | 3.90E-07    | 5.31E-06    |
| RALB         | 998.9291624 | 0.342802664  | 0.085008676 | 2.68E-05    | 0.000246954 |
| ARL13B       | 438.9154435 | 0.342611552  | 0.142915413 | 0.00730753  | 0.031541597 |
| ARFIP2       | 809.3554858 | -0.342327623 | 0.093989891 | 0.000131204 | 0.001008906 |
| NPM3         | 2169.519368 | -0.34232185  | 0.082874602 | 1.79E-05    | 0.000171486 |
| MPND         | 198.5926913 | 0.342320657  | 0.16522915  | 0.016474266 | 0.060582898 |
| KARS1        | 8029.745573 | -0.34228606  | 0.062311634 | 1.99E-08    | 3.38E-07    |
| ERC1         | 2197.608141 | -0.342281827 | 0.079101668 | 7.44E-06    | 7.71E-05    |
| CEP97        | 878.6538679 | 0.342241797  | 0.125024928 | 0.002833753 | 0.014411298 |
| TMEM43       | 2285.729702 | -0.342219927 | 0.081682349 | 1.38E-05    | 0.00013589  |
| PHLDA1       | 152.4069865 | -0.342107433 | 0.172402951 | 0.020116884 | 0.071240099 |
| TCTN3        | 1653.480108 | -0.342081305 | 0.083617928 | 2.13E-05    | 0.000200336 |
| EPN1         | 1000.528978 | 0.342070356  | 0.10389312  | 0.000467259 | 0.003078881 |
| C2orf42      | 532.769307  | 0.342049188  | 0.107124669 | 0.000666658 | 0.004188867 |
| BOLA2-SMG1P6 | 710.3791596 | 0.342025513  | 0.097608841 | 0.000217286 | 0.001569773 |
| TP53RK       | 1281.770539 | 0.341945846  | 0.093335885 | 0.000119553 | 0.000928388 |
| MOB4         | 883.6169968 | -0.341891496 | 0.121750939 | 0.002318691 | 0.012167507 |
| ND1          | 23687.75207 | -0.341872662 | 0.08812209  | 5.13E-05    | 0.000439981 |
| PPM1K        | 496.8616591 | -0.34159792  | 0.134167875 | 0.005021756 | 0.023171261 |
| DHRS4L2      | 412.0772031 | -0.341475966 | 0.117641639 | 0.001745749 | 0.009575904 |
| SOHLH2       | 252.8627033 | -0.341353038 | 0.137924718 | 0.006003098 | 0.026820342 |
| LINC01806    | 377.3898683 | -0.34131417  | 0.140689913 | 0.006841584 | 0.029925665 |
| SET          | 18074.54698 | 0.341235384  | 0.078620364 | 6.93E-06    | 7.23E-05    |
| SNRNP25      | 1402.652143 | -0.34118135  | 0.094534153 | 0.000150445 | 0.001138161 |
| TIMM17A      | 5116.985998 | -0.341087277 | 0.082747238 | 1.84E-05    | 0.000176678 |
| KLHL42       | 754.7879173 | 0.340973752  | 0.11424975  | 0.001340372 | 0.007610239 |
| TMEM245      | 1252.061354 | 0.340903965  | 0.092501758 | 0.000110284 | 0.000865707 |
| IL17RA       | 558.0564427 | 0.340887796  | 0.117170424 | 0.001688857 | 0.009311029 |
| RPL12P50     | 6.581790053 | 0.340832672  | 0.590757331 | 0.020792601 | 0.073228691 |
| ZNF2         | 218.3081056 | 0.340821512  | 0.1459618   | 0.008683142 | 0.036222438 |
| BMP8A        | 2539.236984 | -0.340737285 | 0.086921837 | 4.34E-05    | 0.000378948 |
| ZBP1         | 783.4506695 | 0.340717978  | 0.095302471 | 0.000169397 | 0.001263604 |
| ANKRD40      | 1926.540091 | 0.340715205  | 0.078907251 | 7.74E-06    | 7.99E-05    |
| GAPVD1       | 1201.748344 | 0.340684202  | 0.082897251 | 1.93E-05    | 0.000183964 |
| ELF1         | 4735.404799 | 0.340635271  | 0.08962385  | 6.99E-05    | 0.000579717 |
| PHYKPL       | 628.1460718 | -0.340628844 | 0.129139143 | 0.003893957 | 0.018694664 |
| LYSMD3       | 1551.853158 | -0.340595663 | 0.161881342 | 0.015412573 | 0.057546254 |
| HDHD3        | 177.2025628 | 0.340574776  | 0.177023764 | 0.022942336 | 0.079288124 |

|             |             |              |             |             |             |
|-------------|-------------|--------------|-------------|-------------|-------------|
| MSANTD3     | 259.9298347 | 0.340522812  | 0.138036176 | 0.00619285  | 0.027529406 |
| ING1        | 557.4775829 | -0.340364589 | 0.103185479 | 0.000467424 | 0.003078881 |
| P2RX5       | 1075.249719 | -0.340044973 | 0.089482043 | 7.12E-05    | 0.000589653 |
| SEM1        | 1713.711227 | -0.340029885 | 0.099591808 | 0.000310104 | 0.002145867 |
| LSM1        | 1498.604256 | -0.339903575 | 0.089457242 | 7.14E-05    | 0.000590477 |
| ERP27       | 5.21966706  | 0.339800866  | 0.614244647 | 0.014332961 | 0.054394889 |
| ANKRD16     | 194.370276  | 0.339729057  | 0.166973755 | 0.018089795 | 0.065465065 |
| C2CD2L      | 358.0125431 | 0.339581225  | 0.130137963 | 0.00418472  | 0.01987025  |
| GOLGA2      | 829.2309243 | 0.339527126  | 0.128002827 | 0.003701001 | 0.017897299 |
| ACTG1       | 97739.00809 | -0.339474866 | 0.085718099 | 3.71E-05    | 0.000328917 |
| LONRF1      | 169.7500703 | 0.339415526  | 0.16437908  | 0.016834889 | 0.061660274 |
| NR1D1       | 221.4101069 | 0.33927105   | 0.150421859 | 0.010759824 | 0.043245816 |
| ATRIP-TREX1 | 160.491431  | -0.339185635 | 0.175812038 | 0.022957243 | 0.079303927 |
| RING1       | 572.4856942 | 0.339177627  | 0.11447489  | 0.001436148 | 0.008090364 |
| PLA2G15     | 476.4915137 | -0.339071963 | 0.12398803  | 0.002947067 | 0.01484852  |
| TMEM68      | 738.7526805 | -0.338794799 | 0.119022084 | 0.002027656 | 0.010857425 |
| REV3L       | 503.9270644 | -0.338793207 | 0.111456016 | 0.001132584 | 0.006619293 |
| DCC         | 810.4938861 | -0.338756412 | 0.101118186 | 0.000391574 | 0.002632331 |
| GMFG        | 3017.552861 | 0.338754604  | 0.07374232  | 2.17E-06    | 2.54E-05    |
| CCSER2      | 451.3174397 | 0.338728513  | 0.116181619 | 0.001669826 | 0.009217845 |
| ARMC1       | 2228.134732 | -0.338535985 | 0.142421828 | 0.007899987 | 0.033558529 |
| SHARPIN     | 247.816023  | 0.338488637  | 0.181242243 | 0.025989436 | 0.087475038 |
| GPRIN1      | 298.6358023 | 0.338329671  | 0.145908716 | 0.009208521 | 0.038030992 |
| NDUFAF2     | 1211.428778 | -0.338173786 | 0.086605365 | 4.78E-05    | 0.000412794 |
| G2E3        | 497.3083282 | 0.338043118  | 0.16887287  | 0.01940186  | 0.069189048 |
| HYLS1       | 472.7224066 | 0.337947284  | 0.122897651 | 0.002786263 | 0.014199444 |
| DNTTIP2     | 1943.106544 | -0.337892736 | 0.078948498 | 9.43E-06    | 9.54E-05    |
| MYO1E       | 152.3497248 | -0.337592835 | 0.182150465 | 0.026938459 | 0.08995243  |
| CD59        | 6170.46137  | -0.337551648 | 0.066203417 | 1.74E-07    | 2.53E-06    |
| RPS11P5     | 289.3699469 | 0.337549102  | 0.164096444 | 0.017288573 | 0.063108394 |
| PDIA5       | 2072.632406 | -0.337313824 | 0.078476718 | 8.68E-06    | 8.86E-05    |
| GRK2        | 3228.348465 | 0.337289092  | 0.104882367 | 0.000626315 | 0.003974311 |
| EEF1G       | 93866.27871 | -0.337278356 | 0.068399527 | 6.30E-07    | 8.28E-06    |
| EML2-AS1    | 146.4839285 | -0.337267594 | 0.169476233 | 0.020333258 | 0.07184473  |
| RNU5A-1     | 8.021062297 | 0.337177724  | 0.655999564 | 0.004453818 | 0.0209129   |
| UCKL1       | 541.9570524 | 0.336994248  | 0.109463487 | 0.001001562 | 0.005954028 |
| SDHC        | 6921.921204 | -0.336881694 | 0.076842106 | 5.89E-06    | 6.24E-05    |
| GRK5        | 213.2608236 | -0.336756219 | 0.149539084 | 0.01100382  | 0.044006413 |
| CRELD2      | 1008.458819 | -0.336577752 | 0.105050395 | 0.000666562 | 0.004188867 |
| RNPS1       | 2861.284487 | -0.33651349  | 0.078452873 | 9.04E-06    | 9.17E-05    |
| FAAP100     | 194.9265036 | -0.336455648 | 0.181538953 | 0.027194916 | 0.090569059 |
| MAU2        | 1026.38036  | 0.336450106  | 0.110590337 | 0.001127505 | 0.006591832 |
| RPSAP9      | 1611.569864 | -0.336432243 | 0.099656635 | 0.000363354 | 0.002465599 |
| NCDN        | 623.6253906 | -0.336408912 | 0.118529466 | 0.002183185 | 0.011572148 |
| BPGM        | 445.0989559 | 0.336360623  | 0.109074438 | 0.000980928 | 0.005851443 |
| EAF1        | 1366.910314 | -0.336282887 | 0.081269002 | 1.76E-05    | 0.000169443 |
| MGRN1       | 516.7865856 | -0.336266346 | 0.119362654 | 0.002320423 | 0.012172905 |
| SLC38A5     | 7085.605756 | -0.336254305 | 0.083622509 | 2.92E-05    | 0.000266526 |
| DENND6B     | 460.2265289 | -0.336173046 | 0.117678567 | 0.002056052 | 0.010975538 |
| TOP1MT      | 782.3329983 | -0.336115632 | 0.09549794  | 0.000213036 | 0.001543577 |

|                |             |              |             |             |             |
|----------------|-------------|--------------|-------------|-------------|-------------|
| DEAF1          | 331.489909  | 0.336066728  | 0.144479403 | 0.009134146 | 0.037777887 |
| FOXN1          | 1702.190359 | 0.335734724  | 0.090526142 | 0.000102612 | 0.000814735 |
| FDPS           | 14718.46404 | -0.335647802 | 0.07040633  | 9.55E-07    | 1.21E-05    |
| ATP6VOD1       | 2041.859584 | -0.335641118 | 0.084178422 | 3.34E-05    | 0.000300499 |
| ERCC6          | 288.2648573 | 0.335545953  | 0.137288198 | 0.006660334 | 0.029243663 |
| HSP90AA3P      | 440.55311   | -0.3355307   | 0.143441573 | 0.008828635 | 0.036751314 |
| WDR59          | 775.4691511 | -0.335499262 | 0.103521059 | 0.000586508 | 0.003756124 |
| SEPSECS        | 308.4663646 | 0.335419778  | 0.138175261 | 0.006966092 | 0.030353419 |
| TBL3           | 792.3257236 | -0.335363656 | 0.106703969 | 0.0008217   | 0.005026276 |
| CORO2A         | 392.4542651 | 0.334971681  | 0.116145594 | 0.001878397 | 0.010196929 |
| TMEM109        | 3347.048031 | 0.334707208  | 0.085274291 | 4.30E-05    | 0.000375827 |
| PSMG4          | 271.9761148 | -0.334600757 | 0.140063139 | 0.007869716 | 0.033491723 |
| TNFRSF14       | 430.4232179 | 0.334546992  | 0.122027147 | 0.002916773 | 0.014725877 |
| RND1           | 305.2123998 | 0.334501351  | 0.129133706 | 0.004512085 | 0.021134914 |
| EXOSC9         | 1048.071697 | -0.334421882 | 0.100154603 | 0.000416657 | 0.002783663 |
| CCDC169-SOHLH2 | 247.5358568 | -0.334377752 | 0.137297985 | 0.006983936 | 0.030402418 |
| F12            | 511.8411991 | -0.334322288 | 0.143321686 | 0.009166861 | 0.037899473 |
| R3HCC1         | 1024.824561 | -0.334209561 | 0.090583104 | 0.000113204 | 0.00088613  |
| ZNF304         | 422.0857655 | 0.334124974  | 0.110648107 | 0.001225453 | 0.007054912 |
| RPS13          | 27834.89052 | -0.334104872 | 0.075416663 | 4.91E-06    | 5.30E-05    |
| CAB39L         | 221.769844  | 0.334063077  | 0.149980083 | 0.011713518 | 0.046142628 |
| UBAP2L         | 6243.24372  | -0.333951517 | 0.070070845 | 9.64E-07    | 1.22E-05    |
| SLC25A11       | 1620.08905  | 0.333939158  | 0.089049814 | 8.82E-05    | 0.000710226 |
| NCAPH          | 1528.959329 | 0.333832139  | 0.078907451 | 1.17E-05    | 0.000117438 |
| CPNE1          | 2380.321919 | 0.333739422  | 0.081411051 | 2.09E-05    | 0.000197444 |
| NUP188         | 3271.517797 | 0.333658169  | 0.07645049  | 6.41E-06    | 6.72E-05    |
| HSPE1-MOB4     | 3159.788551 | -0.333518215 | 0.104907627 | 0.000724194 | 0.004512729 |
| STK38L         | 2105.056147 | 0.333413296  | 0.124669497 | 0.003541602 | 0.017310168 |
| HSP90AB1       | 44159.27332 | -0.33324387  | 0.062122077 | 4.42E-08    | 7.15E-07    |
| CEP83          | 193.1424172 | -0.33312511  | 0.171680669 | 0.022814352 | 0.078983632 |
| MAP2K7         | 1171.181383 | 0.333108008  | 0.090385889 | 0.000113548 | 0.000887724 |
| TMEM116        | 244.995156  | 0.332900596  | 0.142413965 | 0.00895258  | 0.037176718 |
| BFAR           | 1490.481571 | -0.332741923 | 0.086981132 | 6.63E-05    | 0.000554477 |
| ACOX1          | 786.8455368 | -0.332671569 | 0.099051281 | 0.000393716 | 0.002644676 |
| ZNF584         | 201.1392281 | 0.332575692  | 0.153030646 | 0.01354116  | 0.052074677 |
| TMPO           | 5835.521301 | 0.332527112  | 0.114180099 | 0.001700759 | 0.009364342 |
| EMC3           | 2815.352814 | -0.332404422 | 0.073061458 | 2.77E-06    | 3.16E-05    |
| PCYT1A         | 2211.177112 | 0.332381311  | 0.071555558 | 1.76E-06    | 2.11E-05    |
| DGAT1          | 156.2466811 | 0.332367074  | 0.169764    | 0.022071462 | 0.076965667 |
| H1-2           | 1185.752572 | -0.332268601 | 0.163401127 | 0.018445157 | 0.066442734 |
| PM20D2         | 2516.759821 | -0.33196679  | 0.132306442 | 0.005730313 | 0.025767808 |
| QKI            | 1875.063416 | -0.331766129 | 0.135797103 | 0.006848108 | 0.029938199 |
| BRIP1          | 771.7062962 | 0.331757292  | 0.13411671  | 0.006263207 | 0.027781749 |
| LYRM1          | 361.4145283 | -0.331691827 | 0.146820255 | 0.011047015 | 0.044149816 |
| FKBP8          | 5137.176634 | 0.331606183  | 0.09265904  | 0.000172718 | 0.001285881 |
| C13orf46       | 177.7827663 | -0.3315259   | 0.157765568 | 0.016153168 | 0.059693645 |
| MCFD2          | 2304.877929 | 0.331456702  | 0.075696501 | 5.94E-06    | 6.28E-05    |
| MYEOV          | 174.6945955 | -0.331428015 | 0.165184827 | 0.020167291 | 0.071389408 |
| LOC642502      | 2299.107469 | -0.331274883 | 0.078454268 | 1.24E-05    | 0.000123597 |
| SMARCC1        | 5855.419293 | -0.331235668 | 0.063009323 | 7.67E-08    | 1.19E-06    |



|            |             |              |             |             |             |
|------------|-------------|--------------|-------------|-------------|-------------|
| ARID5A     | 1431.31562  | 0.330912159  | 0.097360618 | 0.000336461 | 0.002305699 |
| RBBP6      | 834.3688042 | -0.330629678 | 0.11583128  | 0.002094567 | 0.011157064 |
| ZFAT       | 220.7755766 | 0.330618211  | 0.14213668  | 0.009313779 | 0.038419893 |
| HDGFL2     | 666.4651129 | 0.330608227  | 0.100212492 | 0.000480423 | 0.003147746 |
| ZNF44      | 279.1308862 | 0.330451911  | 0.131488199 | 0.005665564 | 0.025549629 |
| ZNF330     | 1418.237059 | -0.330449512 | 0.101114747 | 0.000539467 | 0.003479311 |
| SLC25A13   | 822.1717186 | -0.330371795 | 0.100036546 | 0.000480059 | 0.003146546 |
| TMSB4XP6   | 1487.796797 | 0.330324022  | 0.099844593 | 0.000468161 | 0.003082566 |
| EMSY       | 413.9827908 | 0.330199227  | 0.113866566 | 0.001804638 | 0.00983971  |
| RRBP1      | 4355.188653 | 0.330198573  | 0.125170584 | 0.004003512 | 0.019114645 |
| RPS14P1    | 2113.127552 | -0.330025974 | 0.078130659 | 1.24E-05    | 0.000123542 |
| PITPNM1    | 378.122326  | 0.32986336   | 0.142634369 | 0.009697983 | 0.039777349 |
| FOXN2      | 925.1086626 | 0.329803028  | 0.163305469 | 0.019392132 | 0.06918285  |
| MAP4       | 2262.981106 | -0.329734538 | 0.083679008 | 4.16E-05    | 0.000364025 |
| KBTBD6     | 532.9633477 | 0.329728201  | 0.125702054 | 0.00415181  | 0.019724797 |
| NUBPL      | 196.4176951 | -0.329719572 | 0.154218654 | 0.014900204 | 0.056017032 |
| TAMM41     | 347.4607917 | -0.32967707  | 0.121500512 | 0.003241977 | 0.016114042 |
| NCSTN      | 3844.518393 | -0.329568095 | 0.07433927  | 4.83E-06    | 5.21E-05    |
| FAM216A    | 492.9250602 | -0.329552087 | 0.113965214 | 0.001892046 | 0.010256425 |
| SLC35A5    | 1715.338223 | 0.329423592  | 0.11608168  | 0.002208178 | 0.011683172 |
| NDUFAB1    | 796.8087933 | -0.329377918 | 0.108671576 | 0.001215474 | 0.007010095 |
| SND1       | 14561.64581 | -0.329354013 | 0.063944446 | 1.37E-07    | 2.05E-06    |
| CFDP1      | 1198.382023 | -0.329341049 | 0.102275293 | 0.000639648 | 0.004047054 |
| CDAN1      | 213.3125331 | 0.329298915  | 0.161420957 | 0.018567316 | 0.066810659 |
| NUS1       | 4017.737311 | -0.329197701 | 0.111257472 | 0.001510739 | 0.008452819 |
| HNRNPA1P35 | 1553.130714 | -0.329104303 | 0.082102377 | 3.15E-05    | 0.000285326 |
| RPL39      | 19820.05103 | -0.328905506 | 0.086050936 | 6.71E-05    | 0.000560035 |
| PAPSS1     | 1664.261529 | -0.328828771 | 0.079704745 | 1.91E-05    | 0.00018177  |
| ELOB       | 2764.583603 | -0.328803757 | 0.104438688 | 0.000824996 | 0.00504287  |
| RNF26      | 1952.094614 | 0.328792153  | 0.093904117 | 0.000231972 | 0.001669602 |
| RPL9       | 41562.1329  | -0.328768405 | 0.071995985 | 2.86E-06    | 3.24E-05    |
| UTP4       | 2658.168451 | -0.328763707 | 0.079720143 | 1.94E-05    | 0.000184307 |
| OXSR1      | 2371.979318 | -0.328622063 | 0.083878837 | 4.59E-05    | 0.000398138 |
| GATD3      | 2269.115132 | -0.328438548 | 0.072739666 | 3.30E-06    | 3.70E-05    |
| VIRMA      | 2125.301267 | -0.328368264 | 0.080392335 | 2.29E-05    | 0.000214373 |
| ZNF23      | 197.7544597 | -0.328279651 | 0.155440581 | 0.015993362 | 0.059254823 |
| BMS1       | 1469.553786 | -0.328141483 | 0.080686624 | 2.46E-05    | 0.000228111 |
| HMGB2      | 7382.541094 | 0.328105795  | 0.08913351  | 0.00011835  | 0.000920283 |
| VDAC3      | 4809.310331 | -0.328080164 | 0.065924823 | 3.45E-07    | 4.77E-06    |
| ZNF888     | 226.9594971 | 0.328072233  | 0.166498893 | 0.021674148 | 0.075793865 |
| PRKAR1B    | 1124.319683 | -0.328067877 | 0.096569911 | 0.000346907 | 0.002364183 |
| FLNA       | 12425.57899 | 0.328062714  | 0.082465581 | 3.50E-05    | 0.000313304 |
| NPM1       | 55304.86066 | -0.327715841 | 0.071459747 | 2.58E-06    | 2.96E-05    |
| EPS8L2     | 813.7688397 | -0.327698826 | 0.094446466 | 0.00026708  | 0.001881621 |
| LDHB       | 37455.14738 | -0.327622571 | 0.066308675 | 4.22E-07    | 5.72E-06    |
| EMC1       | 2080.274797 | -0.327375357 | 0.079637315 | 2.05E-05    | 0.000194138 |
| EEF1A1P25  | 2918.804844 | -0.327328476 | 0.094316002 | 0.000255511 | 0.001812656 |
| DSCR8      | 742.5444929 | -0.327298506 | 0.101089253 | 0.000614658 | 0.003913246 |
| ZNF562     | 281.3056052 | 0.327055443  | 0.154379831 | 0.015705844 | 0.058414539 |
| PRDX3      | 8491.777484 | -0.327037804 | 0.093632049 | 0.000240403 | 0.001720986 |

|              |             |              |             |             |             |
|--------------|-------------|--------------|-------------|-------------|-------------|
| SGSM2        | 273.328887  | 0.326882931  | 0.143346851 | 0.01060983  | 0.042777748 |
| MEX3C        | 1029.562199 | 0.326864581  | 0.10125963  | 0.000621211 | 0.003947708 |
| DYRK4        | 605.2278516 | -0.326769638 | 0.102823262 | 0.000753097 | 0.004670983 |
| SYNE1        | 247.1897847 | 0.326766083  | 0.142977459 | 0.010420119 | 0.042189668 |
| BAZ2A        | 3929.451957 | 0.326530333  | 0.086043123 | 7.48E-05    | 0.000615609 |
| AHCYL2       | 745.530477  | -0.326507931 | 0.103969347 | 0.000853665 | 0.00518517  |
| HDLBP        | 10593.50413 | -0.326476936 | 0.071430738 | 2.56E-06    | 2.94E-05    |
| HYAL2        | 522.9767051 | -0.326225666 | 0.127147855 | 0.005056972 | 0.023308912 |
| TPCN2        | 393.5736211 | -0.326179507 | 0.14597829  | 0.012066797 | 0.047222763 |
| PLCB1        | 368.3100772 | 0.326176697  | 0.127972169 | 0.005192424 | 0.02383807  |
| ALDH16A1     | 1534.593513 | 0.326047977  | 0.129330055 | 0.005646528 | 0.025490334 |
| IL12A        | 203.3990626 | 0.325892088  | 0.156076708 | 0.017023663 | 0.062298979 |
| RB1CC1       | 1612.527116 | -0.325817538 | 0.113914188 | 0.002107621 | 0.011216248 |
| BRWD1        | 886.9835306 | 0.325698595  | 0.118644902 | 0.002956867 | 0.014889232 |
| ZNF780A      | 230.2918062 | 0.325654049  | 0.164933355 | 0.021792878 | 0.076147551 |
| NUS1P1       | 1670.618789 | -0.325644348 | 0.112122131 | 0.001838009 | 0.009996484 |
| TAF7         | 3063.757019 | -0.325563241 | 0.072111544 | 3.34E-06    | 3.73E-05    |
| TUBB4A       | 521.4568144 | -0.325467242 | 0.121787195 | 0.003734592 | 0.018024508 |
| SPAG5        | 1810.553418 | 0.32517188   | 0.079414378 | 2.19E-05    | 0.000205826 |
| POLR3C       | 4076.982619 | 0.325165934  | 0.0684375   | 1.04E-06    | 1.31E-05    |
| SLC6A6       | 1456.052595 | -0.325011491 | 0.080170641 | 2.65E-05    | 0.000244018 |
| DGKE         | 638.4920297 | 0.324997653  | 0.126485254 | 0.004935901 | 0.022844142 |
| LOC101927209 | 137.8084401 | 0.324991374  | 0.17912445  | 0.030934461 | 0.099998517 |
| LOC105372948 | 170.747401  | 0.324935586  | 0.167412103 | 0.023565636 | 0.080985535 |
| RPS27A       | 63106.34257 | -0.324894258 | 0.082041429 | 4.35E-05    | 0.000379537 |
| USP49        | 292.9359666 | 0.324815389  | 0.128778552 | 0.005640321 | 0.025468954 |
| DDIAS        | 661.8179068 | 0.324757887  | 0.106743154 | 0.001178807 | 0.00683408  |
| TCP11L1      | 260.4270797 | 0.324754953  | 0.145944132 | 0.012256519 | 0.047900281 |
| UNKL         | 272.6699046 | -0.324409725 | 0.141680659 | 0.010559471 | 0.042624326 |
| STARD4       | 589.6457882 | -0.324274068 | 0.151404142 | 0.015131162 | 0.056678851 |
| SYNJ1        | 355.2639586 | 0.324196493  | 0.15089293  | 0.014724086 | 0.055502175 |
| RBM39        | 6885.789873 | -0.324034868 | 0.067844706 | 9.51E-07    | 1.20E-05    |
| WDR62        | 467.8256612 | 0.324013354  | 0.116809309 | 0.002737825 | 0.013989646 |
| RAD51D       | 624.1952219 | 0.323960584  | 0.112305075 | 0.001963393 | 0.010572194 |
| TOMM6        | 3872.541499 | -0.323778012 | 0.085386892 | 7.86E-05    | 0.000642587 |
| TAB3         | 749.9169994 | 0.323718442  | 0.107468756 | 0.001298533 | 0.00740257  |
| GHDC         | 2155.063949 | -0.323661246 | 0.112880157 | 0.002091643 | 0.01114835  |
| RPL10AP6     | 2785.662341 | -0.323508088 | 0.080398928 | 3.01E-05    | 0.000273675 |
| MTFR2        | 587.014449  | 0.323506493  | 0.122705874 | 0.004124897 | 0.019618469 |
| IL10RB       | 1764.694952 | 0.323380854  | 0.076721645 | 1.31E-05    | 0.000129485 |
| PLK1         | 2195.954776 | 0.323153053  | 0.094375837 | 0.000316309 | 0.002183152 |
| FAM168A      | 492.2567157 | 0.323093368  | 0.110241475 | 0.001701231 | 0.009364342 |
| RNF216P1     | 546.7627285 | -0.323043065 | 0.105452576 | 0.001113835 | 0.006525127 |
| KLHL2        | 254.883814  | 0.32284965   | 0.157908531 | 0.018846339 | 0.067569783 |
| ARHGAP18     | 537.1195298 | 0.322806917  | 0.144644417 | 0.012151673 | 0.047522701 |
| GNB5         | 403.0988494 | 0.32277434   | 0.125787819 | 0.005041708 | 0.023250932 |
| KIF1C        | 632.5172007 | -0.322727532 | 0.107578823 | 0.001376027 | 0.007789689 |
| ZNF124       | 213.3576435 | 0.322467307  | 0.157352092 | 0.018765637 | 0.067364124 |
| CRY2         | 555.867583  | -0.322454429 | 0.110657071 | 0.00181021  | 0.00986388  |
| TKFC         | 2344.425591 | 0.322382841  | 0.105560206 | 0.001143869 | 0.006671182 |

|            |             |              |             |             |             |
|------------|-------------|--------------|-------------|-------------|-------------|
| MBD6       | 294.3421655 | 0.322344503  | 0.143295033 | 0.011698991 | 0.04610638  |
| MEX3D      | 274.0534786 | 0.322272323  | 0.171658093 | 0.027391341 | 0.091113302 |
| ZBTB17     | 178.0452092 | 0.322146755  | 0.17420083  | 0.028988564 | 0.095345673 |
| GPR15      | 5774.699597 | 0.322099689  | 0.097708045 | 0.000492335 | 0.003218484 |
| CACNB3     | 264.5116939 | 0.322069447  | 0.148560642 | 0.014343258 | 0.054422042 |
| KLHL5      | 1148.923859 | 0.321864689  | 0.113984703 | 0.002365249 | 0.012374325 |
| APOBEC3C   | 4250.230076 | 0.321365158  | 0.071520876 | 3.61E-06    | 4.01E-05    |
| MOSPD3     | 200.950219  | 0.321319455  | 0.160642388 | 0.021248341 | 0.074560796 |
| POLR3E     | 620.7435419 | -0.32123011  | 0.102838002 | 0.000918209 | 0.00552873  |
| YIF1B      | 2888.718208 | -0.321195027 | 0.117077553 | 0.00307717  | 0.015409879 |
| FNDC3A     | 2136.167236 | -0.321158115 | 0.111097644 | 0.001987229 | 0.010673959 |
| RPL13A     | 92581.23793 | -0.32097504  | 0.076587754 | 1.50E-05    | 0.000146756 |
| TMBIM1     | 2233.664677 | 0.320906018  | 0.082458019 | 5.24E-05    | 0.000448835 |
| IDH2       | 503.455556  | 0.320893462  | 0.118657026 | 0.003419899 | 0.016829325 |
| ACAP1      | 2143.99653  | 0.320876792  | 0.099933589 | 0.000673132 | 0.004221884 |
| MYO1G      | 1673.568403 | 0.320769439  | 0.092621191 | 0.000278219 | 0.001949782 |
| TRAF4      | 1265.393114 | -0.320624027 | 0.092603643 | 0.00028192  | 0.001970935 |
| ATP6       | 45999.09096 | -0.32058606  | 0.095499608 | 0.000346636 | 0.002363263 |
| SMG9       | 429.1103347 | 0.320548585  | 0.111486554 | 0.002042974 | 0.010919194 |
| FAM214A    | 604.3275386 | 0.320308112  | 0.116243188 | 0.002938865 | 0.01482013  |
| LDHA       | 63029.27874 | -0.32014567  | 0.065700833 | 5.99E-07    | 7.89E-06    |
| MDK        | 352.5408085 | 0.320132853  | 0.128211371 | 0.006178326 | 0.02748268  |
| METTL18    | 388.9654868 | -0.319966812 | 0.125955076 | 0.005512276 | 0.024995045 |
| AXIN1      | 420.9351388 | -0.319951953 | 0.12231793  | 0.004496907 | 0.021079455 |
| DHX38      | 1232.715556 | -0.319859024 | 0.105044316 | 0.001198908 | 0.006934367 |
| RPS26P3    | 813.0023968 | -0.319846342 | 0.092618686 | 0.000291768 | 0.002033216 |
| TDRKH      | 853.1501544 | -0.319843133 | 0.089124268 | 0.000175022 | 0.001298968 |
| PPA1       | 9336.432141 | -0.319810116 | 0.078233146 | 2.33E-05    | 0.000217733 |
| KLHL18     | 963.0934588 | -0.319807042 | 0.100244096 | 0.00073909  | 0.004595628 |
| ZBTB24     | 563.8648016 | 0.319665602  | 0.118411208 | 0.003467512 | 0.017024923 |
| CASP6      | 308.0210719 | 0.319613147  | 0.1378816   | 0.009916424 | 0.040519754 |
| ARHGEF7    | 1560.844486 | -0.319444218 | 0.07829486  | 2.41E-05    | 0.000224568 |
| CHD4       | 7274.012601 | -0.319337166 | 0.072073887 | 5.15E-06    | 5.53E-05    |
| TBC1D8B    | 175.1791156 | -0.319303373 | 0.15692173  | 0.019935306 | 0.070727246 |
| CDKN2AIPNL | 481.5621955 | 0.31923571   | 0.114218929 | 0.002619926 | 0.013454705 |
| ZFX        | 833.9339017 | 0.318969454  | 0.103144616 | 0.001018285 | 0.006034788 |
| ACBD7      | 361.197384  | 0.318917573  | 0.144566815 | 0.013166117 | 0.050915063 |
| SASS6      | 408.0903594 | 0.318912213  | 0.174844196 | 0.030741628 | 0.099523793 |
| ZDHHC12-DT | 186.0451956 | 0.318801281  | 0.153906388 | 0.018250906 | 0.065915714 |
| HOOK3      | 817.8259565 | -0.318792465 | 0.127203834 | 0.006087147 | 0.027146824 |
| RPL22      | 15734.18398 | -0.318656646 | 0.070447603 | 3.32E-06    | 3.72E-05    |
| CKAP2      | 3577.854098 | 0.318652845  | 0.105012589 | 0.001235249 | 0.007097146 |
| CHD9       | 608.4355641 | -0.318462827 | 0.143410013 | 0.012790068 | 0.049604838 |
| ABHD2      | 2603.797315 | 0.318311553  | 0.073763114 | 8.51E-06    | 8.71E-05    |
| CCDC134    | 1083.158503 | 0.318200059  | 0.105358146 | 0.001305141 | 0.007434581 |
| LSM3       | 2929.915079 | -0.318120608 | 0.082456085 | 6.19E-05    | 0.000521396 |
| ADH5       | 2507.046653 | -0.318083837 | 0.082492619 | 6.18E-05    | 0.000521161 |
| PRKCD      | 1058.416164 | -0.317954414 | 0.096192932 | 0.000500501 | 0.003268164 |
| RPSAP26    | 641.0633947 | -0.317883253 | 0.146356592 | 0.014391035 | 0.05459136  |
| TMED4      | 1712.92636  | -0.317602266 | 0.083555986 | 7.75E-05    | 0.000635552 |

|                 |             |              |             |             |             |
|-----------------|-------------|--------------|-------------|-------------|-------------|
| RN7SL1          | 2188.069043 | 0.317530537  | 0.669453073 | 2.09E-06    | 2.46E-05    |
| LOC102724023    | 2217.091493 | -0.317471021 | 0.073558774 | 8.61E-06    | 8.80E-05    |
| PTPN9           | 559.0033217 | 0.317465228  | 0.109472286 | 0.001915306 | 0.010351857 |
| CARMIL2         | 512.7811804 | -0.317408491 | 0.132937193 | 0.008507187 | 0.035618705 |
| PAK2            | 5476.004751 | 0.317235542  | 0.086654401 | 0.00013032  | 0.001003446 |
| TBCB            | 2593.408839 | 0.317197686  | 0.093028401 | 0.00034278  | 0.002342514 |
| DRC3            | 6.411708487 | -0.316892157 | 0.537234085 | 0.02804812  | 0.092834345 |
| LZTFL1          | 950.0356163 | -0.31676653  | 0.112648166 | 0.002538745 | 0.013111674 |
| SMPD3           | 247.0534637 | -0.316687534 | 0.154633255 | 0.019474915 | 0.069363863 |
| SH2B3           | 344.2148624 | 0.31663304   | 0.145030617 | 0.014098642 | 0.053658504 |
| CPTP            | 290.312101  | 0.31661365   | 0.138124288 | 0.010821391 | 0.04340839  |
| STK36           | 240.7004074 | -0.316546454 | 0.145417205 | 0.014467305 | 0.05478889  |
| SEPTIN9         | 5059.501889 | 0.316535624  | 0.083463438 | 7.92E-05    | 0.000647031 |
| COX7A2L         | 4723.60225  | -0.316479231 | 0.072032397 | 6.10E-06    | 6.44E-05    |
| SUSD1           | 270.7338066 | 0.316324744  | 0.130941014 | 0.007836054 | 0.033398215 |
| MOB2            | 241.1978842 | 0.316320504  | 0.13924083  | 0.011359292 | 0.045147775 |
| RSRC2           | 1522.750394 | -0.31632045  | 0.079790149 | 3.95E-05    | 0.000348068 |
| CEACAM21        | 185.1164289 | 0.316315211  | 0.160089521 | 0.022906847 | 0.07920884  |
| ETS1            | 311.7067026 | 0.316309991  | 0.152090136 | 0.0179319   | 0.065031771 |
| SRSF5           | 2028.528368 | -0.316218237 | 0.079292911 | 3.60E-05    | 0.000320896 |
| FBXO9           | 917.2977004 | 0.316209487  | 0.092943492 | 0.000353049 | 0.002402261 |
| AHCY            | 15667.39228 | -0.316008544 | 0.079650508 | 4.01E-05    | 0.000352439 |
| DCPS            | 1311.497638 | 0.315938467  | 0.095220625 | 0.000477988 | 0.003135346 |
| TCF25           | 1533.186763 | -0.315899386 | 0.094660388 | 0.00045113  | 0.002987463 |
| CNOT7           | 4193.805647 | -0.315796535 | 0.089172703 | 0.000212099 | 0.001538073 |
| CTU2            | 418.0183582 | -0.315754862 | 0.123335424 | 0.00534706  | 0.024392792 |
| DDR2            | 993.024344  | -0.315673073 | 0.098412029 | 0.000703418 | 0.004389733 |
| RYK             | 507.6255588 | 0.315669444  | 0.129343592 | 0.007297752 | 0.031536625 |
| ATL2            | 2633.1936   | -0.315668701 | 0.100909928 | 0.000928816 | 0.005579015 |
| SRXN1           | 2833.475426 | -0.315654771 | 0.084630002 | 0.000103609 | 0.00082152  |
| PDCL            | 653.6993453 | 0.315408017  | 0.132892103 | 0.008787588 | 0.036608355 |
| ARL6IP6         | 476.8831238 | 0.315370522  | 0.165578388 | 0.026569781 | 0.089064827 |
| HECTD3          | 498.2326162 | 0.315237968  | 0.106479931 | 0.001594064 | 0.008864612 |
| FDFT1           | 7279.044672 | -0.315228465 | 0.062637571 | 2.82E-07    | 3.97E-06    |
| SPCS1           | 4386.556441 | -0.315014288 | 0.072045248 | 6.72E-06    | 7.02E-05    |
| SNORA103        | 953.6982334 | -0.315012464 | 0.089553109 | 0.000234497 | 0.001684274 |
| CAPN15          | 517.8620314 | -0.314821444 | 0.125557771 | 0.006186875 | 0.027513641 |
| MED27           | 802.5420076 | 0.314697751  | 0.094099428 | 0.000437149 | 0.002904878 |
| RNF19A          | 689.5421728 | -0.314686367 | 0.112689146 | 0.002707238 | 0.013853796 |
| TADA2A          | 329.9907576 | 0.314630144  | 0.139191487 | 0.011703197 | 0.046112461 |
| BBS1            | 186.694678  | -0.314588066 | 0.164706234 | 0.026695495 | 0.089365143 |
| ISOC2           | 3853.740795 | 0.314532401  | 0.116676611 | 0.003578476 | 0.017460827 |
| HMOX2           | 624.3372171 | -0.314438848 | 0.111153568 | 0.002431215 | 0.012673493 |
| ENOSF1          | 466.2263741 | -0.314377803 | 0.117791309 | 0.003920802 | 0.018807903 |
| TCERG1          | 1954.527613 | -0.314240453 | 0.080988972 | 5.65E-05    | 0.000480039 |
| RCOR3           | 635.7699295 | 0.314209916  | 0.112797651 | 0.002740065 | 0.013996964 |
| CYCSP27         | 164.1279882 | -0.314171611 | 0.166651353 | 0.028159984 | 0.093115609 |
| SSBP1           | 4825.237121 | -0.314141383 | 0.077803284 | 2.94E-05    | 0.000267745 |
| JMY             | 859.140776  | -0.314115238 | 0.127422735 | 0.006953491 | 0.030315611 |
| TSC22D4-C7ORF61 | 319.318122  | 0.314060745  | 0.138350805 | 0.011528162 | 0.045682651 |

|           |             |              |             |             |             |
|-----------|-------------|--------------|-------------|-------------|-------------|
| GAGE2A    | 1413.827164 | -0.314028151 | 0.0829475   | 8.32E-05    | 0.000675486 |
| HEATR6    | 252.8286804 | 0.314000443  | 0.145418715 | 0.015129734 | 0.056678851 |
| AGA       | 332.9788766 | -0.313861195 | 0.123717486 | 0.005714594 | 0.025717157 |
| SLC16A1   | 2423.03446  | -0.313570995 | 0.102038708 | 0.001124829 | 0.00657841  |
| STRBP     | 2614.742878 | -0.313544912 | 0.085022464 | 0.000121684 | 0.000944085 |
| C19orf25  | 584.3177353 | 0.313531607  | 0.143037771 | 0.01406716  | 0.053585792 |
| CENATAC   | 356.357511  | 0.313522895  | 0.123340771 | 0.005600848 | 0.02531712  |
| LTO1      | 165.1298634 | 0.313424674  | 0.165463775 | 0.02747545  | 0.091340442 |
| NDEL1     | 1265.010871 | -0.313370531 | 0.097359134 | 0.000674407 | 0.004228354 |
| TARS2     | 2426.692753 | -0.313265922 | 0.082498977 | 8.00E-05    | 0.000652573 |
| TAOK3     | 396.5968708 | 0.313172562  | 0.139024069 | 0.011991996 | 0.047025679 |
| OR51B4    | 4.841090439 | -0.313157248 | 0.564722822 | 0.014723147 | 0.055502175 |
| STRADB    | 732.1803522 | -0.312774864 | 0.100399769 | 0.00098373  | 0.005862094 |
| PSPH      | 1418.456015 | -0.312603447 | 0.088391179 | 0.000224681 | 0.001619819 |
| NSL1      | 398.3147151 | 0.312513973  | 0.132476225 | 0.009173042 | 0.037899473 |
| TPP2      | 3901.367265 | -0.312324243 | 0.079036976 | 4.21E-05    | 0.000367962 |
| LINC01580 | 6.79605658  | -0.312176486 | 0.535983431 | 0.024899418 | 0.084595493 |
| PTPN12    | 172.8296489 | 0.312067556  | 0.157767384 | 0.023076355 | 0.079620093 |
| RPL32     | 36650.70605 | -0.312047281 | 0.062815228 | 3.77E-07    | 5.17E-06    |
| SNX14     | 1339.344937 | 0.311994874  | 0.084085588 | 0.000111416 | 0.000873423 |
| MRPS21    | 3318.118932 | -0.311952159 | 0.07310317  | 1.10E-05    | 0.000110696 |
| PPP1R15B  | 4409.680916 | -0.311808505 | 0.08513778  | 0.000136324 | 0.0010418   |
| MGME1     | 751.566075  | 0.311714203  | 0.094670693 | 0.000530795 | 0.003434893 |
| USPL1     | 1008.363039 | -0.311685721 | 0.084405831 | 0.000121252 | 0.000941154 |
| BIRC5     | 3146.645647 | 0.311541599  | 0.07333734  | 1.18E-05    | 0.000117636 |
| MLF2      | 3746.6099   | -0.311402889 | 0.097830725 | 0.00077891  | 0.004805707 |
| NUDT16L1  | 488.5537171 | -0.311347197 | 0.114341617 | 0.00341305  | 0.016800926 |
| ARMCX6    | 439.7454711 | -0.311340538 | 0.111995823 | 0.002862703 | 0.014524884 |
| PEX2      | 887.7341034 | -0.311258083 | 0.102278695 | 0.001257792 | 0.007198012 |
| EHD4      | 989.7855335 | -0.311195068 | 0.104573492 | 0.001562758 | 0.0087073   |
| DNASE2    | 1948.374001 | 0.310997985  | 0.09626597  | 0.000661352 | 0.004161564 |
| SLC9A3R1  | 6083.148174 | 0.31091904   | 0.085082581 | 0.000139746 | 0.001064195 |
| ANGEL1    | 538.2545225 | -0.310892498 | 0.108931402 | 0.002284079 | 0.012011214 |
| ERI1      | 1077.898167 | -0.310822628 | 0.121585523 | 0.005476315 | 0.02485277  |
| ACP1      | 8449.57562  | -0.310554815 | 0.062020758 | 3.10E-07    | 4.34E-06    |
| MAN1A1    | 6292.38465  | -0.31052835  | 0.123756872 | 0.006275008 | 0.027812723 |
| EPOP      | 1051.674328 | -0.310406739 | 0.113920815 | 0.003395368 | 0.01673393  |
| DUS1L     | 1916.628902 | -0.310387426 | 0.104895149 | 0.001650656 | 0.0091324   |
| OTUD3     | 236.1910295 | -0.310380374 | 0.140813762 | 0.013942091 | 0.053285187 |
| LMAN1     | 12937.07407 | -0.310303668 | 0.107670754 | 0.001750533 | 0.009596067 |
| TBCEL     | 863.9720046 | 0.31027281   | 0.108752648 | 0.002271954 | 0.011962126 |
| RPS13P2   | 1582.803813 | -0.310092848 | 0.093924235 | 0.000523503 | 0.003396594 |
| MDH2      | 10413.89721 | -0.309860887 | 0.072337215 | 1.02E-05    | 0.000103118 |
| ZNF655    | 913.1817522 | -0.309802787 | 0.086891555 | 0.000198991 | 0.001455208 |
| ZNF473    | 635.6935536 | 0.30979777   | 0.099179481 | 0.000951364 | 0.005698638 |
| ZNF17     | 207.3636751 | 0.309776249  | 0.166343519 | 0.029938562 | 0.097595768 |
| PRR11     | 1437.137275 | 0.309754603  | 0.104349242 | 0.001580484 | 0.008794741 |
| AUNIP     | 310.3860682 | 0.309534986  | 0.123418518 | 0.006280638 | 0.027830557 |
| SLC35D1   | 1435.510771 | -0.309503135 | 0.081082873 | 7.43E-05    | 0.000612413 |
| FTH1P8    | 355.6239076 | 0.30942898   | 0.118085411 | 0.004576376 | 0.021401643 |

|            |             |              |             |             |             |
|------------|-------------|--------------|-------------|-------------|-------------|
| SCAMP3     | 4362.208068 | -0.309405628 | 0.085013943 | 0.000150236 | 0.001137078 |
| LINC00888  | 690.7934806 | 0.309309318  | 0.112291672 | 0.003075939 | 0.015408168 |
| SERPINI1   | 338.2970748 | -0.309259122 | 0.134729722 | 0.011107109 | 0.044359274 |
| LSM5       | 2256.40967  | -0.309072735 | 0.098947199 | 0.000963517 | 0.005761472 |
| FUT8       | 783.2292705 | 0.309004503  | 0.090441899 | 0.000343451 | 0.002345243 |
| SETD9      | 290.715788  | 0.308999738  | 0.143930961 | 0.015961388 | 0.059159178 |
| ND5        | 25620.5203  | -0.308946238 | 0.123901051 | 0.006626671 | 0.029118006 |
| RAB5B      | 2242.499564 | 0.308618934  | 0.076911214 | 3.26E-05    | 0.00029434  |
| WDR76      | 776.0389935 | 0.308408639  | 0.098747721 | 0.000958167 | 0.005733443 |
| NCKAP1     | 452.8697067 | -0.308309044 | 0.127230908 | 0.007952029 | 0.033751295 |
| MLX        | 1860.551668 | 0.308302957  | 0.079290055 | 5.55E-05    | 0.000472699 |
| RIN3       | 457.0053081 | 0.308290756  | 0.154676184 | 0.022654692 | 0.078588001 |
| ARL2-SNX15 | 333.8727705 | 0.308270109  | 0.133631298 | 0.010760883 | 0.043245816 |
| EXT1       | 1292.981728 | -0.308089019 | 0.080816376 | 7.64E-05    | 0.000627428 |
| KDM4A      | 1243.045924 | 0.307985171  | 0.081115967 | 8.02E-05    | 0.000653988 |
| SARM1      | 587.5387537 | -0.307978162 | 0.129680433 | 0.009133483 | 0.037777887 |
| TRIM39     | 237.3979753 | -0.307886788 | 0.140894828 | 0.014717373 | 0.055502175 |
| PPP4R2     | 2629.430036 | -0.307881305 | 0.128335925 | 0.008522141 | 0.03567269  |
| ARRDC2     | 466.8981848 | 0.307825225  | 0.119037559 | 0.005074092 | 0.02337538  |
| STK3       | 345.0051244 | -0.307816719 | 0.127459152 | 0.008159184 | 0.034461606 |
| POLR1G     | 688.5606453 | 0.307777326  | 0.109797674 | 0.002678722 | 0.013728153 |
| H2AZ1      | 15662.56424 | -0.307710808 | 0.079570691 | 6.27E-05    | 0.00052744  |
| SIDT1      | 1139.947659 | 0.307671941  | 0.089687578 | 0.000328039 | 0.002256019 |
| C16orf54   | 198.1848843 | 0.307565137  | 0.150814863 | 0.020589696 | 0.072602683 |
| SCRIB      | 734.6966788 | -0.307358649 | 0.129127604 | 0.009019333 | 0.037365498 |
| ZBED5      | 352.4530477 | 0.307315348  | 0.13443722  | 0.011351299 | 0.045129366 |
| RPL7AP11   | 1222.035021 | 0.307096565  | 0.082524003 | 0.000109088 | 0.000857503 |
| TIMM17B    | 1655.671807 | -0.307021942 | 0.09810459  | 0.000957852 | 0.005733443 |
| CIPC       | 265.0442386 | 0.306989699  | 0.132582859 | 0.010586293 | 0.04269279  |
| KLHL24     | 2309.789831 | 0.306924359  | 0.11310034  | 0.003514093 | 0.017204848 |
| RPL29P12   | 213.6116048 | -0.306875207 | 0.160457092 | 0.027616225 | 0.091702813 |
| OTUD6B-AS1 | 507.7827774 | -0.30686239  | 0.157445279 | 0.025287039 | 0.085643586 |
| THRA       | 287.4916769 | 0.306752952  | 0.139002592 | 0.013951773 | 0.053310427 |
| OXNAD1     | 876.036218  | -0.306728355 | 0.101662274 | 0.001390333 | 0.007868103 |
| EIF2B3     | 710.3230813 | -0.306723069 | 0.099057644 | 0.001071639 | 0.006303525 |
| PLBD2      | 930.7553805 | -0.306696882 | 0.114341931 | 0.003868256 | 0.018591894 |
| RFT1       | 1438.401089 | -0.306660821 | 0.08777577  | 0.000257692 | 0.001822901 |
| SYT1       | 788.9830841 | 0.306422049  | 0.105358973 | 0.001920495 | 0.010373975 |
| ZNF639     | 1023.594707 | -0.306379612 | 0.097404823 | 0.000903678 | 0.005449872 |
| TYMS       | 10179.26771 | -0.306371453 | 0.06653744  | 2.34E-06    | 2.72E-05    |
| TMED3      | 4510.788894 | -0.30627249  | 0.082644252 | 0.000117047 | 0.000912124 |
| BUD23      | 4991.282261 | -0.306163979 | 0.069722753 | 6.40E-06    | 6.71E-05    |
| MAGEA12    | 2457.681355 | -0.306157343 | 0.088049688 | 0.000280175 | 0.001960316 |
| TRMT61A    | 438.6090057 | 0.306144073  | 0.138370222 | 0.013740391 | 0.052700409 |
| E2F4       | 1177.700996 | -0.305974669 | 0.098878707 | 0.001076657 | 0.006328743 |
| TMSB4X     | 37893.87346 | 0.305714011  | 0.065374727 | 1.51E-06    | 1.82E-05    |
| DIXDC1     | 1317.70944  | -0.305687419 | 0.111515846 | 0.00327771  | 0.016245019 |
| NDUFAF8    | 989.9820024 | -0.30557673  | 0.139396724 | 0.014722697 | 0.055502175 |
| PRKCB      | 582.4184704 | 0.305553536  | 0.100242084 | 0.001231957 | 0.007080586 |
| FAM133B    | 609.2311914 | -0.305480906 | 0.113903873 | 0.003901534 | 0.01872066  |

|              |             |              |             |             |             |
|--------------|-------------|--------------|-------------|-------------|-------------|
| PLA2G6       | 261.19187   | 0.305450089  | 0.155201783 | 0.024378922 | 0.083164729 |
| MAPK6        | 2284.996956 | -0.305384144 | 0.102935357 | 0.00164065  | 0.009094476 |
| ZNF766       | 511.8012908 | 0.305332566  | 0.105208885 | 0.001992548 | 0.010689268 |
| DNAJA3       | 2307.602464 | -0.305269256 | 0.073164562 | 1.70E-05    | 0.00016439  |
| DCP1B        | 329.1565382 | -0.305242357 | 0.123181421 | 0.006921733 | 0.030192355 |
| CDK9         | 903.3340116 | 0.305178128  | 0.097256691 | 0.000926687 | 0.005568161 |
| XXYLT1       | 871.5357816 | 0.305146688  | 0.098149741 | 0.001017135 | 0.00603003  |
| ATAD2B       | 210.7882562 | 0.304969882  | 0.147673843 | 0.019588788 | 0.069726421 |
| ITGAL        | 1468.154346 | 0.3049068    | 0.085176885 | 0.000190093 | 0.001396627 |
| NCAPG        | 2254.353052 | 0.304415572  | 0.075735832 | 3.22E-05    | 0.000291244 |
| ZNF16        | 224.8282162 | 0.304351967  | 0.15400998  | 0.024056243 | 0.082263422 |
| ZMYM2        | 1542.689575 | -0.304338715 | 0.08631499  | 0.000234687 | 0.001684938 |
| KCNJ4        | 6.902944339 | -0.304079589 | 0.530391978 | 0.022437573 | 0.078022381 |
| NANP         | 281.2211398 | -0.304019456 | 0.138327231 | 0.014438216 | 0.054710413 |
| NOL10        | 2732.447423 | -0.303796147 | 0.076600283 | 4.12E-05    | 0.000361345 |
| COX4I1       | 16056.77419 | -0.303783729 | 0.07085607  | 1.03E-05    | 0.000103786 |
| SBDS         | 1790.383682 | -0.303709306 | 0.092876827 | 0.000595852 | 0.003806113 |
| SLC25A15     | 823.6499338 | -0.303594201 | 0.097140961 | 0.000974863 | 0.005821277 |
| ZNF273       | 323.76727   | 0.303555657  | 0.162083629 | 0.030038167 | 0.097850064 |
| LOC105375631 | 4.886468523 | 0.303376582  | 0.533289806 | 0.019390134 | 0.06918285  |
| RAP2B        | 1526.903762 | 0.303288324  | 0.091372178 | 0.000496915 | 0.003245971 |
| GZF1         | 791.6013525 | -0.303177227 | 0.102917284 | 0.001762765 | 0.009647849 |
| EEF2         | 117008.6091 | -0.303042264 | 0.068936741 | 6.30E-06    | 6.63E-05    |
| RPL39P3      | 17563.16447 | -0.302944235 | 0.07607777  | 3.88E-05    | 0.00034262  |
| HNRNPA1P2    | 276.7549015 | -0.302715376 | 0.135956115 | 0.013561753 | 0.052130715 |
| STAM2        | 469.8989045 | 0.302648012  | 0.12348836  | 0.007488548 | 0.032170476 |
| FOXK1        | 757.7209764 | 0.302406563  | 0.130435283 | 0.010749323 | 0.043219417 |
| TOB1         | 1101.564251 | -0.302253106 | 0.11448559  | 0.00446781  | 0.020967225 |
| COX3         | 135134.7273 | -0.30176516  | 0.071783252 | 1.50E-05    | 0.000146573 |
| RNF40        | 1087.507891 | -0.301706995 | 0.098728488 | 0.001242086 | 0.007124201 |
| FUBP3        | 1450.825335 | 0.301692738  | 0.123620242 | 0.007746572 | 0.033081971 |
| SLC25A10     | 553.4874776 | -0.30167971  | 0.131521104 | 0.011566803 | 0.045762469 |
| CLPTM1L      | 13373.92184 | -0.301660479 | 0.088693984 | 0.000374762 | 0.00253407  |
| SDE2         | 623.623546  | 0.301598166  | 0.135316755 | 0.013388784 | 0.051625704 |
| CCNB1        | 4599.807073 | 0.301569878  | 0.069936683 | 9.08E-06    | 9.21E-05    |
| SNRK         | 942.6693929 | -0.301506908 | 0.115875931 | 0.004988216 | 0.023028775 |
| BTN2A1       | 303.9492101 | 0.301462552  | 0.132114514 | 0.011858944 | 0.046630639 |
| CCNI         | 3941.147697 | -0.301445439 | 0.077209521 | 5.36E-05    | 0.000458495 |
| KAT14        | 419.6421806 | 0.301444744  | 0.114254417 | 0.004451233 | 0.020906427 |
| HNRNPA1L2    | 2431.590444 | -0.301440136 | 0.075429398 | 3.67E-05    | 0.000326384 |
| RPL23A       | 35013.05322 | -0.301425192 | 0.068219021 | 5.82E-06    | 6.18E-05    |
| ZNF507       | 899.9918867 | 0.301398598  | 0.113588974 | 0.004274203 | 0.020203357 |
| WDR35        | 10395.40967 | -0.301357402 | 0.078015423 | 6.36E-05    | 0.000534014 |
| CCAR2        | 2459.50263  | -0.301313362 | 0.0805429   | 0.000103285 | 0.000819703 |
| TOMM20P4     | 233.1762256 | -0.301278195 | 0.149541845 | 0.022599755 | 0.078460295 |
| BANP         | 258.1818688 | 0.301175711  | 0.142618621 | 0.017911771 | 0.064999611 |
| TTC28        | 402.5624144 | -0.301101598 | 0.143638375 | 0.018577802 | 0.066828374 |
| ZGPAT        | 360.5848021 | 0.301091482  | 0.131784418 | 0.011727642 | 0.046177257 |
| CLN3         | 658.0830995 | -0.301040699 | 0.105831738 | 0.002455522 | 0.012780968 |
| FBH1         | 1868.552997 | 0.301008755  | 0.084616069 | 0.000210146 | 0.001525189 |

|                     |             |              |             |             |             |
|---------------------|-------------|--------------|-------------|-------------|-------------|
| ENTPD6              | 1661.626405 | -0.300724841 | 0.086829467 | 0.000300288 | 0.00208755  |
| CLEC2B              | 1083.242168 | 0.300657037  | 0.118949046 | 0.006128617 | 0.027296621 |
| MDN1                | 903.049406  | -0.300496223 | 0.10718476  | 0.002770968 | 0.014133979 |
| ZNF845              | 345.2896092 | 0.300492505  | 0.129658614 | 0.010786268 | 0.043297588 |
| RPUSD2              | 675.8320381 | 0.300444592  | 0.107043491 | 0.002731515 | 0.013961523 |
| AKAP17A             | 713.0310649 | -0.300407194 | 0.11698645  | 0.005566531 | 0.025188299 |
| HIVEP2              | 533.8677343 | -0.30020386  | 0.118978353 | 0.006266185 | 0.027787842 |
| MRPL32              | 1589.565538 | -0.300175185 | 0.07690318  | 5.41E-05    | 0.000461669 |
| ZKSCAN8             | 573.4688022 | 0.300101878  | 0.130687383 | 0.011352054 | 0.045129366 |
| PPM1B               | 1046.466048 | 0.300007268  | 0.109780563 | 0.003389627 | 0.0167136   |
| FCHSD1              | 238.1039914 | 0.2999668    | 0.142821717 | 0.018484392 | 0.066547654 |
| PTPN23              | 510.4332659 | -0.299959443 | 0.121975843 | 0.007474289 | 0.032125158 |
| AIP                 | 1183.234794 | 0.299810433  | 0.08627682  | 0.000284015 | 0.001983984 |
| GALNT2              | 3247.046501 | -0.299661186 | 0.076401113 | 5.04E-05    | 0.000432446 |
| GTF3C4              | 2290.487388 | 0.299660439  | 0.08147418  | 0.000132546 | 0.001016967 |
| UBQLN4              | 1787.563425 | -0.299538974 | 0.092655494 | 0.000690974 | 0.004324391 |
| DECR2               | 183.5416353 | -0.299446229 | 0.159064163 | 0.030332728 | 0.098494628 |
| TSPYL4              | 321.3197864 | -0.29941402  | 0.127250584 | 0.00987658  | 0.040398324 |
| LZIC                | 525.401781  | 0.299085953  | 0.114604962 | 0.004894383 | 0.022686302 |
| TBC1D7-LOC100130357 | 388.1389507 | -0.299078417 | 0.114966555 | 0.005047811 | 0.023272882 |
| SUPT20H             | 668.6620744 | 0.298913733  | 0.105287502 | 0.002491762 | 0.012926855 |
| CHMP3               | 796.0442345 | 0.298906574  | 0.091307575 | 0.000595429 | 0.003805187 |
| STK26               | 1840.181169 | 0.298894905  | 0.12446736  | 0.008644035 | 0.03608697  |
| CNTROB              | 644.530816  | 0.298800002  | 0.097344197 | 0.001189468 | 0.006891272 |
| LACTB2              | 791.3530371 | -0.298747887 | 0.14482931  | 0.020355622 | 0.071879753 |
| ALG5                | 3526.052891 | -0.298580546 | 0.073587838 | 2.87E-05    | 0.000262271 |
| DCP2                | 1229.299746 | 0.298541474  | 0.121496797 | 0.007525817 | 0.032290527 |
| ACTL6A              | 2691.792082 | 0.298518189  | 0.08173625  | 0.000146091 | 0.00110813  |
| EXOC6               | 621.2238367 | 0.298411469  | 0.122591843 | 0.007994397 | 0.033889589 |
| LCOR                | 758.4301821 | 0.298268527  | 0.106117697 | 0.002707128 | 0.013853796 |
| RBM3                | 12428.62938 | -0.298193612 | 0.083359159 | 0.000196723 | 0.001439227 |
| LAMTOR1             | 1447.955503 | 0.298184096  | 0.097355612 | 0.001226204 | 0.007056889 |
| AGO3                | 356.3670873 | 0.298064296  | 0.120461762 | 0.007216451 | 0.031273094 |
| SENP1               | 1487.115119 | 0.298017819  | 0.083595412 | 0.000205765 | 0.001498414 |
| NBEAL1              | 897.2720884 | -0.297944356 | 0.091557803 | 0.000642303 | 0.00406237  |
| CCNG2               | 348.2048782 | -0.297762544 | 0.138813426 | 0.016808346 | 0.061576081 |
| NR2C1               | 226.4692828 | 0.297521887  | 0.145408671 | 0.021093961 | 0.074139257 |
| ATF7IP              | 1531.096668 | 0.297398008  | 0.100433911 | 0.001684493 | 0.009289927 |
| TELO2               | 397.3235349 | -0.297369967 | 0.143949369 | 0.020458561 | 0.072199082 |
| NSMF                | 996.3417848 | 0.297343919  | 0.101524177 | 0.001894769 | 0.010260075 |
| NUP54               | 892.1653896 | -0.29730994  | 0.105861143 | 0.002755519 | 0.014067606 |
| PDHB                | 3526.103465 | -0.296921075 | 0.069513124 | 1.14E-05    | 0.000114386 |
| RPS6                | 98093.0749  | -0.296905041 | 0.064847235 | 2.90E-06    | 3.28E-05    |
| ITGAE               | 671.4669008 | 0.29689864   | 0.104424938 | 0.002485582 | 0.012906396 |
| MRPS34              | 2655.960258 | -0.296836345 | 0.081793389 | 0.000163416 | 0.001221879 |
| UBA5                | 2031.681788 | -0.296419656 | 0.07233612  | 2.43E-05    | 0.000225434 |
| SCHIP1              | 6.484781178 | -0.296413948 | 0.511559158 | 0.024971069 | 0.084739172 |
| NLRP2               | 1739.865416 | 0.296355898  | 0.086362349 | 0.000340426 | 0.00232826  |
| TUBAP2              | 4607.783173 | 0.296315057  | 0.073949735 | 3.54E-05    | 0.000316564 |
| BPNT2               | 4591.537599 | -0.296247764 | 0.106994333 | 0.003096365 | 0.01549256  |



|             |             |              |             |             |             |
|-------------|-------------|--------------|-------------|-------------|-------------|
| COLGALT1    | 2215.462348 | -0.296150237 | 0.099811043 | 0.001696814 | 0.00934894  |
| COPB1       | 6427.505721 | -0.296059191 | 0.069680654 | 1.26E-05    | 0.000124851 |
| RPS26P39    | 296.1283806 | -0.296051055 | 0.147515744 | 0.023298304 | 0.080178204 |
| RPL17       | 23735.56283 | -0.295934126 | 0.069568496 | 1.30E-05    | 0.000128714 |
| NORAD       | 7852.974148 | -0.295845808 | 0.105589311 | 0.002855096 | 0.014499031 |
| FAH         | 1012.481687 | -0.295752744 | 0.088853297 | 0.000500932 | 0.003269746 |
| WAS         | 896.9852785 | -0.295713894 | 0.094661628 | 0.001015067 | 0.006020561 |
| TRAF3IP3    | 729.1622609 | 0.295671926  | 0.098731053 | 0.001532253 | 0.008551763 |
| CXXC1       | 1276.37425  | 0.295544491  | 0.091930499 | 0.0007399   | 0.004599013 |
| E2F6        | 1047.152067 | -0.295373437 | 0.095818225 | 0.00116302  | 0.006760662 |
| TLE3        | 1293.62585  | 0.295339975  | 0.085342718 | 0.000306806 | 0.002126036 |
| UBAC2       | 1226.72842  | -0.295264131 | 0.08372269  | 0.000242587 | 0.001734467 |
| PHYH        | 357.435093  | -0.295202466 | 0.122800106 | 0.008909344 | 0.037051661 |
| BID         | 2113.31469  | 0.29493213   | 0.079625037 | 0.000122641 | 0.000950657 |
| CDCA2       | 1193.686754 | 0.294760631  | 0.084165367 | 0.00026034  | 0.001840719 |
| PPME1       | 573.7451257 | 0.294585778  | 0.101700141 | 0.002110539 | 0.011228325 |
| RPL23AP2    | 6533.92674  | -0.294516185 | 0.063788727 | 2.24E-06    | 2.61E-05    |
| LOC285591   | 397.198487  | -0.294441551 | 0.118604439 | 0.007177996 | 0.031129818 |
| GRIPAP1     | 421.5960537 | 0.294407961  | 0.114180629 | 0.005435041 | 0.02470953  |
| THUMPD3-AS1 | 244.448053  | -0.294169711 | 0.153892271 | 0.029063334 | 0.095519028 |
| SPOPL       | 873.0260682 | 0.293987204  | 0.153731319 | 0.028894043 | 0.095088968 |
| SUV39H1     | 1080.198913 | 0.293854983  | 0.100731556 | 0.001989126 | 0.010680838 |
| PRDX2       | 7293.184328 | -0.293803974 | 0.085356547 | 0.00033416  | 0.002292653 |
| ZNF747      | 217.7032336 | -0.293798994 | 0.152082654 | 0.028002702 | 0.092749538 |
| TSPYL1      | 2093.723485 | -0.293792036 | 0.078707987 | 0.000109884 | 0.000862975 |
| KIF13B      | 591.3379777 | 0.293786138  | 0.115146333 | 0.005906008 | 0.026434307 |
| ERCC6L      | 887.3329057 | 0.293751601  | 0.094545838 | 0.001070071 | 0.006296441 |
| ZNF211      | 227.543993  | 0.293634901  | 0.148553669 | 0.025161333 | 0.085284557 |
| SKA2        | 2380.193585 | 0.293610069  | 0.125592673 | 0.010492313 | 0.042422457 |
| EXOC1       | 701.3626996 | 0.293374677  | 0.094131326 | 0.001034144 | 0.006116214 |
| KHDRBS3     | 278.9025084 | 0.293320952  | 0.138710622 | 0.018254305 | 0.065915714 |
| TUBA1B      | 57731.1391  | 0.293313742  | 0.073896524 | 4.12E-05    | 0.000361345 |
| PKHD1       | 327.2723349 | 0.29325848   | 0.124761814 | 0.010239744 | 0.041605267 |
| ATAD5       | 426.2606853 | 0.293242278  | 0.134423373 | 0.015569935 | 0.057958848 |
| PTCH1       | 342.1707    | 0.293136326  | 0.137557823 | 0.017614674 | 0.064082628 |
| PABPC4      | 9163.224073 | -0.29309836  | 0.062896286 | 1.92E-06    | 2.27E-05    |
| MAMLD1      | 3.658575502 | 0.292924968  | 0.564132665 | 0.000525864 | 0.003408076 |
| PSMB4       | 15213.44171 | -0.292679072 | 0.080562523 | 0.000166913 | 0.001246948 |
| HEXA        | 4249.073041 | -0.292662724 | 0.081967143 | 0.000208289 | 0.001513958 |
| PHTF2       | 1199.247676 | 0.292560646  | 0.125835004 | 0.010901314 | 0.043678401 |
| FMC1-LUC7L2 | 1764.778239 | -0.292437509 | 0.086402099 | 0.000410622 | 0.002749395 |
| ILF2        | 17227.87467 | -0.29231254  | 0.060077261 | 6.86E-07    | 8.94E-06    |
| MCM6        | 5108.259306 | -0.292198306 | 0.063654938 | 2.64E-06    | 3.02E-05    |
| GPX1        | 3083.684225 | -0.292160488 | 0.104188237 | 0.002867821 | 0.014542331 |
| HLA-G       | 1276.015043 | 0.292030052  | 0.121714764 | 0.008902913 | 0.037033808 |
| CACNB1      | 260.9836965 | 0.292001397  | 0.131942228 | 0.014531021 | 0.054941855 |
| CSNK2A2     | 2349.057318 | -0.291940625 | 0.085892548 | 0.000391416 | 0.002632289 |
| NUP214      | 1266.067953 | 0.291853275  | 0.084270739 | 0.000310659 | 0.002147577 |
| NXPH4       | 397.5849585 | 0.291745281  | 0.125037109 | 0.010737893 | 0.043193519 |
| SLC9A8      | 358.0828848 | 0.291710139  | 0.134033727 | 0.015998809 | 0.059262328 |

|                |             |              |             |             |             |
|----------------|-------------|--------------|-------------|-------------|-------------|
| RAVER2         | 238.5462564 | -0.291676142 | 0.152313229 | 0.029173535 | 0.095772151 |
| DDX47          | 2882.440601 | -0.291623848 | 0.073553844 | 4.34E-05    | 0.000378888 |
| PIK3R4         | 1119.726106 | -0.291498649 | 0.085578966 | 0.000388148 | 0.002615392 |
| TMEM115        | 540.1970083 | -0.291480699 | 0.105769344 | 0.003313284 | 0.016399721 |
| GPR107         | 1773.448539 | 0.291404324  | 0.079615748 | 0.000146914 | 0.001113396 |
| ASAH1          | 2177.309363 | -0.291398188 | 0.094738047 | 0.001206707 | 0.00696784  |
| HCP5           | 884.802851  | 0.291347938  | 0.10206464  | 0.00244708  | 0.012740856 |
| PSME1          | 7524.925216 | 0.291335574  | 0.070568119 | 2.15E-05    | 0.000202007 |
| UBN1           | 1016.725114 | -0.291289904 | 0.102306972 | 0.002520338 | 0.013056917 |
| ZNF277         | 608.4198807 | -0.291232539 | 0.123730296 | 0.010270194 | 0.0417192   |
| ATL3           | 1373.724988 | 0.291227501  | 0.115674856 | 0.006553352 | 0.028847075 |
| UVRAG          | 1112.816925 | 0.291215449  | 0.086264971 | 0.000425632 | 0.002834872 |
| ZNF761         | 306.0012091 | 0.290938529  | 0.126359211 | 0.011671828 | 0.046030754 |
| CCDC91         | 839.2615271 | 0.290790759  | 0.131304765 | 0.014511637 | 0.054904527 |
| YTHDC1         | 1171.884504 | -0.290740659 | 0.086113608 | 0.000433184 | 0.002880739 |
| UBE2V2         | 2627.253969 | -0.290637578 | 0.145409792 | 0.024849798 | 0.084468264 |
| TAPBPL         | 960.1205917 | -0.290549798 | 0.093273603 | 0.001067029 | 0.006284946 |
| DCUN1D1        | 1367.767309 | 0.290461979  | 0.145892424 | 0.024305769 | 0.082952899 |
| RABGEF1        | 1070.304166 | -0.290438811 | 0.091708574 | 0.000890962 | 0.005377759 |
| DNAAF10        | 554.7853692 | 0.290304707  | 0.109519595 | 0.004498444 | 0.021079455 |
| PLAAT3         | 1054.12559  | 0.290294686  | 0.110138409 | 0.004713667 | 0.021983995 |
| PCNA           | 10987.42013 | -0.290196476 | 0.070012377 | 2.02E-05    | 0.000191675 |
| HNRNPA1P54     | 271.4820298 | -0.290170458 | 0.137484215 | 0.018891042 | 0.067688015 |
| LOC107985051   | 5.0447856   | 0.290168628  | 0.501085482 | 0.02680255  | 0.089654193 |
| SNORD58B       | 201.4156662 | -0.290149642 | 0.146805437 | 0.025534368 | 0.086278761 |
| RPL35P5        | 955.1386566 | 0.290068847  | 0.090603947 | 0.00079128  | 0.004869438 |
| MTCH1          | 1492.809836 | 0.289988006  | 0.103349121 | 0.002851051 | 0.014482739 |
| RPS3A          | 49298.68708 | -0.289705696 | 0.066973782 | 1.06E-05    | 0.000106607 |
| C1orf198       | 206.7153571 | 0.289567756  | 0.150827684 | 0.028998602 | 0.095358532 |
| ARHGEF12       | 4787.388584 | 0.289456259  | 0.077482195 | 0.000109076 | 0.000857503 |
| MIEN1          | 1052.413342 | 0.289417782  | 0.10211454  | 0.002636516 | 0.013519855 |
| GFM1           | 2965.801246 | -0.289416207 | 0.084952103 | 0.000385706 | 0.002600961 |
| DDT            | 939.489891  | 0.289219674  | 0.115230341 | 0.006782509 | 0.029689763 |
| ZBTB5          | 685.4637254 | -0.289202201 | 0.098950331 | 0.002000161 | 0.010723465 |
| RPL17-C18orf32 | 23347.68702 | -0.289116382 | 0.069542198 | 1.97E-05    | 0.000186803 |
| ZFPL1          | 268.9934088 | 0.289081202  | 0.145123    | 0.024852215 | 0.084468264 |
| SMIM29         | 251.4597552 | 0.289077658  | 0.14850304  | 0.027506563 | 0.09140878  |
| AIMP1          | 1464.043132 | -0.289036601 | 0.093501278 | 0.001158016 | 0.006738361 |
| ACSS1          | 3949.262499 | -0.288983063 | 0.08976886  | 0.000753719 | 0.004673073 |
| NEU3           | 496.1255544 | -0.28896519  | 0.109835505 | 0.004817261 | 0.022394765 |
| NCAPD3         | 3669.844564 | 0.288831261  | 0.066724603 | 8.90E-06    | 9.06E-05    |
| TNFRSF6B       | 5.444033738 | 0.288662612  | 0.504837412 | 0.022606393 | 0.07846761  |
| FAM20B         | 908.3652013 | 0.288576045  | 0.088301235 | 0.000628386 | 0.003983073 |
| SRR            | 252.6821558 | 0.288467496  | 0.141405752 | 0.022207027 | 0.077360508 |
| ARAP1          | 780.8615143 | 0.288418007  | 0.108254501 | 0.004382505 | 0.020622781 |
| BTBD7          | 906.0199358 | 0.288341045  | 0.103379156 | 0.003017145 | 0.015148708 |
| PSENNEN        | 1128.61163  | -0.288209487 | 0.101229272 | 0.002556548 | 0.01318789  |
| SSBP3          | 919.5157313 | 0.288204211  | 0.097457162 | 0.00179773  | 0.009817499 |
| RXRБ           | 668.980993  | 0.288198758  | 0.100941653 | 0.002466787 | 0.01282418  |
| GALNT15        | 5.039515183 | -0.288098964 | 0.515783191 | 0.016093451 | 0.05952377  |

|           |             |              |             |             |             |
|-----------|-------------|--------------|-------------|-------------|-------------|
| CD2BP2    | 1516.49044  | -0.288097213 | 0.095095061 | 0.001428054 | 0.008052628 |
| UBR5      | 2751.33295  | -0.288096579 | 0.08041559  | 0.000201115 | 0.001468944 |
| AVEN      | 548.6617701 | -0.288083471 | 0.106889957 | 0.004025116 | 0.019201911 |
| TRIM8     | 1006.277365 | 0.288057769  | 0.105644121 | 0.003647455 | 0.017722364 |
| HLA-DPA1  | 6627.843516 | -0.288020621 | 0.065315665 | 6.24E-06    | 6.57E-05    |
| LEPROTL1  | 1150.323669 | -0.287786788 | 0.108759744 | 0.004644818 | 0.021697955 |
| CSK       | 2094.2166   | 0.287662798  | 0.096483402 | 0.001657032 | 0.009158894 |
| RPL36AP37 | 5754.795227 | -0.287614819 | 0.071323575 | 3.31E-05    | 0.000298255 |
| IL6ST     | 2409.798483 | 0.287597699  | 0.118046447 | 0.008250457 | 0.03474542  |
| ARHGAP5   | 804.2827569 | -0.287504268 | 0.140888433 | 0.02239066  | 0.077890532 |
| SETP14    | 1493.490777 | 0.287500367  | 0.090412596 | 0.000871075 | 0.005276115 |
| CHRNA6    | 3.83315783  | 0.287464538  | 0.540860098 | 0.003575052 | 0.017453734 |
| ASH2L     | 1423.015604 | -0.287346449 | 0.080632709 | 0.000216756 | 0.001566596 |
| RABL6     | 1864.17961  | 0.287240404  | 0.094442732 | 0.001367008 | 0.00774623  |
| BUB1B     | 1014.284612 | 0.28705549   | 0.10638263  | 0.003962253 | 0.018943769 |
| PFN1P1    | 396.3881288 | 0.28702572   | 0.129689472 | 0.014894476 | 0.056011285 |
| LRCH1     | 437.7180568 | 0.286947784  | 0.118931892 | 0.008855067 | 0.036843634 |
| SLC38A7   | 348.1408708 | -0.286898441 | 0.126590489 | 0.013082874 | 0.050638384 |
| C12orf57  | 2028.79918  | -0.286872193 | 0.102982581 | 0.003099399 | 0.015503264 |
| N4BP1     | 887.5979113 | -0.286476585 | 0.088737405 | 0.00073229  | 0.004558257 |
| LUC7L2    | 1787.60373  | -0.286438897 | 0.088602779 | 0.000719964 | 0.004487983 |
| GLB1      | 2098.397578 | -0.286434183 | 0.090314893 | 0.000912787 | 0.005499908 |
| CNPY3     | 1936.003451 | 0.286297552  | 0.081303647 | 0.000252789 | 0.001799975 |
| YBX3      | 3697.986131 | 0.28623681   | 0.073895193 | 6.37E-05    | 0.000534875 |
| TOP1      | 6171.74811  | -0.286096919 | 0.081756261 | 0.000261051 | 0.001844216 |
| SNHG15    | 975.3732903 | 0.286038495  | 0.11684459  | 0.008128532 | 0.034374065 |
| ARHGAP23  | 1078.808659 | -0.285906344 | 0.101859156 | 0.002903911 | 0.014682343 |
| NOB1      | 2320.079066 | -0.285889753 | 0.075920682 | 9.95E-05    | 0.000791915 |
| ATP8      | 7372.923453 | -0.285862825 | 0.130595098 | 0.015887183 | 0.05894972  |
| RGN       | 6.107825075 | -0.285847207 | 0.4941831   | 0.028076663 | 0.092893308 |
| LOC646762 | 2231.268623 | 0.285758671  | 0.072875749 | 5.28E-05    | 0.000452139 |
| PRKAR2A   | 1453.533131 | -0.285707667 | 0.080704922 | 0.000237807 | 0.001703806 |
| PIIP5K1   | 373.3605411 | -0.285652205 | 0.127377784 | 0.014034933 | 0.053500453 |
| SNAPC3    | 906.923673  | 0.285564236  | 0.124218117 | 0.012036675 | 0.047155073 |
| C1orf43   | 13017.07157 | -0.285492051 | 0.066492957 | 1.07E-05    | 0.000107535 |
| ACP2      | 723.7326689 | 0.285461034  | 0.103537072 | 0.003360618 | 0.016598924 |
| RPL22P2   | 398.2786167 | -0.285440178 | 0.143627881 | 0.025680424 | 0.086586428 |
| GID8      | 2237.737131 | -0.285392123 | 0.075261571 | 9.00E-05    | 0.00072373  |
| MARS1     | 7419.033775 | 0.285253328  | 0.069503045 | 2.43E-05    | 0.000225722 |
| MBTPS1    | 2924.481431 | -0.285178177 | 0.070137566 | 2.89E-05    | 0.000263966 |
| UBE2C     | 2715.695816 | 0.285117694  | 0.07748622  | 0.000139141 | 0.001060524 |
| LMBR1     | 2318.937552 | -0.285104296 | 0.102304542 | 0.003054512 | 0.015318557 |
| SLC39A10  | 1010.887057 | -0.285059332 | 0.120889769 | 0.010572819 | 0.042658318 |
| AMD1      | 4793.186809 | -0.28505474  | 0.095384216 | 0.001646945 | 0.009117694 |
| NME1      | 8644.478716 | -0.285018671 | 0.074635964 | 8.08E-05    | 0.00065809  |
| TRMT112   | 2837.444529 | -0.284893258 | 0.074728254 | 8.31E-05    | 0.000674804 |
| SSH2      | 1463.826735 | 0.284734196  | 0.081646537 | 0.000287654 | 0.002008231 |
| SGO1      | 594.2103032 | 0.284726991  | 0.106443396 | 0.004289361 | 0.020261554 |
| OSGIN2    | 999.3631602 | -0.284725652 | 0.103205507 | 0.003362753 | 0.01660473  |
| ACAT2     | 4068.9261   | 0.284209341  | 0.068687849 | 2.08E-05    | 0.000196039 |

|               |             |              |             |             |             |
|---------------|-------------|--------------|-------------|-------------|-------------|
| ITPK1         | 1813.612831 | 0.284191708  | 0.0845013   | 0.000456216 | 0.003017686 |
| CUL4A         | 3457.677824 | -0.284126374 | 0.073136424 | 6.12E-05    | 0.000515867 |
| RPS7P10       | 1220.672059 | -0.284123491 | 0.11398028  | 0.007361056 | 0.031732986 |
| VGf           | 6.230296965 | -0.284058125 | 0.491079045 | 0.028021781 | 0.092782635 |
| TNFRSF10C     | 4.740041479 | -0.283555511 | 0.502159566 | 0.019851043 | 0.07048606  |
| CLASP2        | 1517.211712 | -0.283495425 | 0.079985931 | 0.000235456 | 0.001689762 |
| ATXN3         | 427.3007105 | 0.283453646  | 0.133513115 | 0.018616941 | 0.066886007 |
| KLHL7         | 1200.691313 | -0.283229359 | 0.085125986 | 0.000520812 | 0.003382933 |
| CIAO2B        | 1919.22059  | -0.283198099 | 0.09810769  | 0.002303942 | 0.012108458 |
| CKS2          | 3221.965056 | -0.283186297 | 0.080716249 | 0.000270443 | 0.001902991 |
| ATP11B        | 3786.502902 | 0.283123793  | 0.112981308 | 0.006973027 | 0.030370197 |
| NFIA          | 292.6935116 | 0.283115451  | 0.144953749 | 0.027704016 | 0.091923824 |
| DPYD          | 332.9800743 | 0.283077909  | 0.121448738 | 0.011183026 | 0.04460075  |
| NUGGC         | 238.4551681 | 0.283021738  | 0.13838877  | 0.022532441 | 0.078273677 |
| RPLP2         | 24797.15728 | -0.282959798 | 0.08665532  | 0.000639249 | 0.004046007 |
| RPS25P1       | 3017.823369 | -0.282902073 | 0.083864635 | 0.000425142 | 0.002832698 |
| SNORA105B     | 677.5426944 | -0.282811656 | 0.146552777 | 0.029338794 | 0.096132432 |
| CENPC         | 291.9973037 | -0.282730145 | 0.145480377 | 0.028355055 | 0.093617633 |
| PTPN4         | 505.7013889 | 0.2826539    | 0.136532215 | 0.021235022 | 0.074529162 |
| RPL35         | 33363.99859 | 0.282613503  | 0.066479289 | 1.27E-05    | 0.000126275 |
| STX4          | 289.215767  | -0.282575124 | 0.133283929 | 0.019110862 | 0.06832015  |
| SMIM38        | 4.832812739 | -0.282455682 | 0.515964548 | 0.011663776 | 0.046019961 |
| MTDH          | 15785.05687 | -0.282331279 | 0.089934365 | 0.001012678 | 0.006009782 |
| PIGH          | 523.8750947 | 0.282207182  | 0.122398817 | 0.012016486 | 0.047100383 |
| HSPE1P3       | 242.3526836 | -0.282042421 | 0.140697942 | 0.025121232 | 0.08518198  |
| DAD1          | 3810.01415  | -0.28175546  | 0.087788121 | 0.000816774 | 0.005001438 |
| PARN          | 1139.650382 | -0.281691671 | 0.097765158 | 0.002344069 | 0.01228207  |
| MCTS1         | 1875.075499 | -0.281654146 | 0.075406491 | 0.000114033 | 0.000891116 |
| TBC1D22A      | 772.0741285 | 0.281575126  | 0.09340716  | 0.001525468 | 0.00852421  |
| NFATC3        | 1915.023489 | -0.281268539 | 0.076331338 | 0.000138792 | 0.001058794 |
| PCBP2-OT1     | 574.8020153 | 0.281123968  | 0.10785815  | 0.005323297 | 0.024290784 |
| AP1G2         | 323.1638821 | 0.281048104  | 0.125220484 | 0.014067124 | 0.053585792 |
| JPT2          | 1970.891562 | -0.281032906 | 0.076497935 | 0.000144864 | 0.001099307 |
| FMNL2         | 205.7692097 | -0.280812009 | 0.146614398 | 0.030551724 | 0.099075695 |
| ZNF765-ZNF761 | 298.5497578 | 0.280706747  | 0.125018735 | 0.014073205 | 0.053597028 |
| PAN3          | 1026.563776 | 0.280399096  | 0.119292983 | 0.010691928 | 0.043038613 |
| CLOCK         | 468.8987853 | 0.280314307  | 0.138386812 | 0.023688671 | 0.081279316 |
| ZMYND19       | 677.1355472 | 0.280281966  | 0.107252736 | 0.005236889 | 0.023997671 |
| ERBIN         | 1918.945667 | 0.280079389  | 0.102750068 | 0.003753517 | 0.018105755 |
| ZNF148        | 1311.968404 | 0.280041024  | 0.138263777 | 0.024151512 | 0.082540306 |
| ZNF76         | 364.251353  | 0.279971482  | 0.125668529 | 0.014713452 | 0.055502175 |
| SSBP2         | 971.0470958 | 0.279958541  | 0.098198757 | 0.002575329 | 0.01327291  |
| PPP2R2A       | 2154.20657  | -0.279919953 | 0.073157265 | 7.96E-05    | 0.000650229 |
| ZGRF1         | 271.3729438 | -0.279878244 | 0.144291592 | 0.029003995 | 0.095358532 |
| C15orf40      | 308.6350696 | 0.279815711  | 0.132102712 | 0.019255683 | 0.068795267 |
| CDON          | 790.4486361 | 0.279782335  | 0.095638355 | 0.002033449 | 0.010878356 |
| DEF8          | 921.2546942 | -0.279768698 | 0.10929072  | 0.006171083 | 0.027464571 |
| EMC8          | 1328.067378 | -0.279704166 | 0.100382692 | 0.003175113 | 0.015854509 |
| RPL5P34       | 1658.862674 | -0.279523788 | 0.07707696  | 0.000175076 | 0.001298968 |
| ABHD3         | 771.8483169 | 0.279232277  | 0.100617726 | 0.003266318 | 0.016202634 |

|              |             |              |             |             |             |
|--------------|-------------|--------------|-------------|-------------|-------------|
| PIGN         | 1375.590913 | -0.279013632 | 0.101704215 | 0.00360841  | 0.01757717  |
| DCBLD1       | 296.9628052 | 0.278995943  | 0.127331518 | 0.016211336 | 0.059849327 |
| GTF3C6       | 1223.773448 | -0.278963288 | 0.087048673 | 0.000823564 | 0.005035899 |
| RMC1         | 913.0061262 | 0.278776656  | 0.089568037 | 0.001107627 | 0.006493154 |
| RANBP10      | 516.9676521 | -0.278761725 | 0.116461312 | 0.0097326   | 0.039900434 |
| RPL7AP6      | 2434.428658 | 0.278625575  | 0.094052962 | 0.001822488 | 0.009921416 |
| AP5B1        | 668.9876402 | 0.278547362  | 0.123399213 | 0.013757673 | 0.052743329 |
| DCAF1        | 2575.66101  | -0.278493691 | 0.072045042 | 6.84E-05    | 0.000569228 |
| BAZ1A        | 361.5582522 | -0.278478148 | 0.123284692 | 0.013682197 | 0.052523744 |
| NFYC         | 1056.758959 | 0.278412848  | 0.098076132 | 0.002693264 | 0.013798597 |
| RNF125       | 797.6127597 | 0.278312696  | 0.108490291 | 0.006023711 | 0.026905496 |
| RAB24        | 576.834004  | 0.278274295  | 0.109865123 | 0.006636872 | 0.029155432 |
| GRK6         | 3990.582301 | 0.278211706  | 0.082375279 | 0.000442791 | 0.002937858 |
| TMED9        | 8597.373774 | -0.278173906 | 0.078960319 | 0.000261534 | 0.001845555 |
| CNST         | 589.9897041 | 0.278152285  | 0.105164232 | 0.00472739  | 0.022036128 |
| TGIF2-RAB5IF | 1874.133459 | -0.278145474 | 0.084572999 | 0.000610667 | 0.003890179 |
| PDK2         | 600.9298233 | 0.278080729  | 0.105123914 | 0.004826058 | 0.022423623 |
| SMIM24       | 3.564987027 | 0.277946491  | 0.51964608  | 0.004415714 | 0.020750861 |
| HNRNPA1P15   | 272.5598463 | -0.277903371 | 0.13554121  | 0.0229513   | 0.079299214 |
| SYNRG        | 1332.857308 | 0.277788624  | 0.083270946 | 0.000513041 | 0.003342487 |
| NR1H2        | 1384.960432 | 0.277448895  | 0.115871204 | 0.009686249 | 0.039738633 |
| GFOD2        | 335.1278923 | -0.277435973 | 0.135308862 | 0.022971309 | 0.07933669  |
| TNIP1        | 3408.315764 | 0.277315138  | 0.0758351   | 0.00015554  | 0.001170064 |
| H3P47        | 519.8463328 | 0.277270368  | 0.112742871 | 0.008164069 | 0.034464645 |
| PSMC4        | 4574.782961 | 0.277231241  | 0.076197234 | 0.000167603 | 0.001251569 |
| IRF3         | 1129.314763 | 0.277180694  | 0.091640353 | 0.0014995   | 0.008400129 |
| RETREG2      | 2537.262898 | 0.277101017  | 0.084830906 | 0.000658512 | 0.004148219 |
| ORC2         | 735.3035046 | 0.277059911  | 0.104045316 | 0.004575665 | 0.021401643 |
| PLOD3        | 1687.625065 | -0.276952058 | 0.092753277 | 0.001714395 | 0.009430053 |
| CAPZB        | 3766.391931 | 0.276917526  | 0.076791923 | 0.000188468 | 0.001387037 |
| DDX3X        | 13563.8503  | -0.276830599 | 0.085005115 | 0.000689423 | 0.004316246 |
| ERICH1       | 467.1235415 | -0.276706426 | 0.112915988 | 0.008408811 | 0.035297243 |
| ARMC5        | 486.5612218 | -0.276616703 | 0.140938304 | 0.028188933 | 0.093140192 |
| RERE         | 443.8751557 | 0.276508505  | 0.135429376 | 0.023219508 | 0.079986516 |
| REG1A        | 4.709463697 | 0.276488632  | 0.487480943 | 0.023552423 | 0.080956195 |
| HBG2         | 5.350408091 | -0.276463441 | 0.48393772  | 0.027674605 | 0.091861441 |
| MRPL28       | 1455.026177 | -0.276448421 | 0.08803072  | 0.001031583 | 0.006105237 |
| MAGEF1       | 442.7459543 | 0.276442815  | 0.113647945 | 0.008765784 | 0.036533594 |
| ZDHHC7       | 1255.967507 | -0.276368584 | 0.084946631 | 0.000698068 | 0.004364058 |
| GAPDH        | 208245.2952 | -0.276284074 | 0.073057427 | 0.000153311 | 0.001155808 |
| SCD          | 23897.86495 | -0.276217333 | 0.059831498 | 2.48E-06    | 2.86E-05    |
| PSME2        | 5580.558257 | 0.276028132  | 0.070753543 | 5.72E-05    | 0.000484944 |
| RPL10P16     | 9292.03326  | -0.276023643 | 0.093606001 | 0.001920596 | 0.010373975 |
| LOC112694756 | 20140.35259 | -0.276011234 | 0.079446373 | 0.000319838 | 0.002204328 |
| MON1B        | 1447.411399 | -0.276004219 | 0.080204252 | 0.00035705  | 0.002426621 |
| CHIC2        | 243.974884  | 0.275937816  | 0.137477326 | 0.025355837 | 0.085809463 |
| PEX12        | 257.8933815 | -0.275937629 | 0.137862964 | 0.02567166  | 0.086586428 |
| RNVU1-3      | 5.961299345 | 0.275927003  | 0.481197684 | 0.026831326 | 0.089733116 |
| KLHL11       | 552.1705485 | 0.275844099  | 0.132692659 | 0.021447326 | 0.075137234 |
| HTRA3        | 5.065849926 | 0.275620978  | 0.480586115 | 0.028074838 | 0.092893308 |

|           |             |              |             |             |             |
|-----------|-------------|--------------|-------------|-------------|-------------|
| RPL10P9   | 3770.556286 | -0.275352046 | 0.100276629 | 0.003638077 | 0.01769182  |
| GK        | 293.9915357 | 0.275272673  | 0.133950313 | 0.022667311 | 0.078616026 |
| ELMO2     | 800.6233638 | 0.275163303  | 0.093964989 | 0.002053225 | 0.010963829 |
| SYS1      | 1191.808988 | 0.27513487   | 0.103963429 | 0.00485063  | 0.022519666 |
| PIK3CB    | 749.8476279 | 0.274960285  | 0.103481351 | 0.004676824 | 0.021829801 |
| RPS9P2    | 967.6564244 | -0.274849372 | 0.108948181 | 0.006964598 | 0.030353419 |
| ALG11     | 830.9167885 | -0.274786823 | 0.091648238 | 0.001650067 | 0.009132057 |
| COMMD6    | 1461.68438  | -0.274769131 | 0.087473479 | 0.001034608 | 0.006116866 |
| HSPH1     | 5892.186716 | -0.274730628 | 0.088020801 | 0.001108422 | 0.006495618 |
| LOC729998 | 22432.4099  | -0.274730226 | 0.06223964  | 6.38E-06    | 6.69E-05    |
| PRCC      | 3192.70803  | -0.274583755 | 0.087466483 | 0.001039055 | 0.006136873 |
| DAZAP2    | 6351.282452 | 0.27452953   | 0.071310915 | 7.31E-05    | 0.000603799 |
| RPN2      | 27041.94306 | -0.274486545 | 0.069456537 | 4.86E-05    | 0.000418057 |
| POLR2K    | 1542.555908 | -0.274454768 | 0.09979672  | 0.00359241  | 0.017509082 |
| INTS3     | 1575.436164 | -0.274454721 | 0.093819602 | 0.002092527 | 0.011149627 |
| ADD1      | 3198.733284 | 0.27442854   | 0.068365205 | 3.71E-05    | 0.00032895  |
| ACOT1     | 528.0574176 | 0.274398856  | 0.105719435 | 0.005636308 | 0.025457473 |
| RN7SL3    | 419.7070904 | 0.274347192  | 0.545022315 | 6.20E-06    | 6.53E-05    |
| GALNT7    | 805.1263671 | -0.27430744  | 0.117482669 | 0.011477917 | 0.045546078 |
| TRAF6     | 635.9146473 | -0.274229051 | 0.096938953 | 0.002832391 | 0.014409081 |
| BTG3      | 665.0566759 | 0.274144608  | 0.111444944 | 0.00822543  | 0.034660421 |
| FAM234A   | 286.236454  | -0.274049618 | 0.127356575 | 0.018320783 | 0.066068511 |
| SLC50A1   | 1707.365877 | -0.274017252 | 0.086787888 | 0.000981898 | 0.005853195 |
| ADNP2     | 2044.878367 | -0.273997283 | 0.085771677 | 0.000863033 | 0.005232891 |
| FRG1CP    | 398.7742631 | 0.273988378  | 0.140099416 | 0.028576    | 0.094221362 |
| RNVU1-2A  | 4.688317128 | 0.273929829  | 0.502337853 | 0.010959454 | 0.043870751 |
| UBXN6     | 1590.947527 | 0.273823869  | 0.092463157 | 0.001883392 | 0.010220842 |
| GBP7      | 3.310683266 | 0.273605269  | 0.520434487 | 0.000781204 | 0.004817701 |
| RPS9      | 29711.25847 | -0.273577194 | 0.078420769 | 0.000298137 | 0.002073427 |
| MTFP1     | 1052.831099 | 0.273543361  | 0.109769346 | 0.00754493  | 0.032356503 |
| QSOX2     | 1286.902123 | 0.273383899  | 0.09934572  | 0.00356865  | 0.01743253  |
| AFAP1     | 3.450028265 | 0.273337936  | 0.510373892 | 0.004899037 | 0.022701799 |
| UBL3      | 1370.556457 | 0.27325818   | 0.134219294 | 0.023938458 | 0.081941544 |
| CYTH2     | 1549.094726 | 0.273196047  | 0.088384421 | 0.001221386 | 0.007033838 |
| EIF2AK4   | 987.6636343 | -0.272968101 | 0.089278546 | 0.001374426 | 0.007785716 |
| RPL13AP20 | 2602.895623 | -0.272722946 | 0.073585756 | 0.000132013 | 0.001013725 |
| RAB5A     | 1290.988328 | -0.272721846 | 0.115055062 | 0.01056382  | 0.042631946 |
| PREPL     | 2712.812633 | -0.27271753  | 0.095683219 | 0.002615141 | 0.013434113 |
| GPD1L     | 1073.355826 | -0.272688127 | 0.098677648 | 0.003476441 | 0.017054259 |
| USP4      | 802.9339765 | -0.272615801 | 0.098551891 | 0.003458493 | 0.016985457 |
| OST4      | 5273.050193 | -0.272564812 | 0.080876398 | 0.000468782 | 0.003085479 |
| SLC2A11   | 234.8962443 | -0.272203507 | 0.139911183 | 0.029709768 | 0.097017548 |
| CMC1      | 545.7451335 | -0.272190118 | 0.108782272 | 0.007398471 | 0.03187841  |
| SPAG7     | 1368.994015 | 0.272109639  | 0.084473561 | 0.000783378 | 0.004829388 |
| HAX1      | 7552.519127 | -0.272038731 | 0.069316924 | 5.60E-05    | 0.000476935 |
| C1orf21   | 619.4777335 | -0.271724751 | 0.102243379 | 0.00478396  | 0.022257882 |
| C17orf49  | 1134.874877 | 0.271614     | 0.100866653 | 0.004296357 | 0.020283536 |
| TNKS      | 992.8578581 | -0.271447181 | 0.091811813 | 0.00191205  | 0.010340713 |
| ALDOA     | 20372.03832 | -0.271401486 | 0.079420165 | 0.000400577 | 0.002686596 |
| SYVN1     | 1496.938855 | -0.271331092 | 0.102298786 | 0.004869547 | 0.022595378 |

|              |             |              |             |             |             |
|--------------|-------------|--------------|-------------|-------------|-------------|
| ANKLE1       | 462.7026208 | 0.271299911  | 0.116044611 | 0.011516621 | 0.045657811 |
| NSMCE1       | 779.1636711 | -0.271220131 | 0.098380191 | 0.003596514 | 0.017524153 |
| STX8         | 824.3465738 | 0.271123654  | 0.094273826 | 0.002462012 | 0.012810895 |
| DAP3         | 8795.023775 | -0.271060344 | 0.061608324 | 6.96E-06    | 7.25E-05    |
| MCEE         | 326.7195293 | -0.270753835 | 0.134146093 | 0.025475291 | 0.08612956  |
| LSM14B       | 547.8669508 | 0.270649415  | 0.10434969  | 0.005724867 | 0.025750006 |
| SMPD2        | 367.9639865 | 0.270537635  | 0.129321552 | 0.021291306 | 0.074696424 |
| LOC105371632 | 3.50674429  | -0.270506033 | 0.503779525 | 0.005882745 | 0.026343804 |
| PIKFYVE      | 932.002617  | 0.270350324  | 0.114490137 | 0.010812323 | 0.043382065 |
| FKBP1A       | 4585.164618 | -0.270077512 | 0.067317595 | 3.84E-05    | 0.000339644 |
| SELENOI      | 3353.367034 | -0.270029721 | 0.093970622 | 0.002554478 | 0.013181134 |
| GRPEL2       | 1256.476874 | -0.270024542 | 0.136111581 | 0.027482832 | 0.091347446 |
| NIP7         | 1527.904022 | -0.269907083 | 0.102802356 | 0.005271793 | 0.02411994  |
| PIGP         | 413.419919  | -0.2698405   | 0.116320622 | 0.012150293 | 0.047522701 |
| GNPDA1       | 1476.38114  | -0.269787127 | 0.080681648 | 0.00051938  | 0.003374896 |
| AP1S1        | 596.2177666 | -0.269748734 | 0.100054173 | 0.004316077 | 0.020343359 |
| NUDCD2       | 694.1909615 | 0.269708777  | 0.102753264 | 0.00525598  | 0.024073722 |
| PSMD2        | 7132.689008 | 0.269609035  | 0.07000077  | 7.38E-05    | 0.000608491 |
| SUN2         | 3184.35895  | 0.269602349  | 0.091370349 | 0.001954243 | 0.010532719 |
| MYG1         | 1607.291612 | 0.269554338  | 0.096885284 | 0.003299226 | 0.016342306 |
| TMEM120B     | 327.3933836 | -0.269380085 | 0.122735446 | 0.016665527 | 0.061117521 |
| ZNF510       | 407.324815  | 0.269259076  | 0.121543598 | 0.015754192 | 0.058556629 |
| BIRC3        | 7249.953656 | -0.269227207 | 0.114236745 | 0.011292717 | 0.044969201 |
| NOTCH1       | 887.937418  | 0.269215511  | 0.117441806 | 0.013012393 | 0.050386022 |
| PACS2        | 420.1683965 | 0.269191285  | 0.129836359 | 0.022307202 | 0.077667384 |
| VCL          | 1075.294302 | 0.269171341  | 0.086668515 | 0.001177869 | 0.006830932 |
| ALDH5A1      | 504.2611246 | -0.269111129 | 0.108331197 | 0.007873895 | 0.033491723 |
| TRIM16       | 550.4597856 | 0.269093053  | 0.106999911 | 0.007213149 | 0.03126661  |
| KDM2A        | 2961.115653 | 0.268984301  | 0.07775391  | 0.000339774 | 0.002324717 |
| MAP3K5       | 547.4877028 | 0.268770678  | 0.108282989 | 0.007877334 | 0.033491723 |
| CARM1        | 1730.874554 | -0.26874404  | 0.090525013 | 0.001899656 | 0.010276895 |
| CDK5RAP1     | 1209.537517 | -0.268738784 | 0.096309218 | 0.003264871 | 0.016202634 |
| NPAT         | 1091.812697 | 0.268629127  | 0.122141158 | 0.016490525 | 0.060629813 |
| SPHK2        | 412.6102161 | 0.268564034  | 0.13175321  | 0.024287031 | 0.0829164   |
| RPUSD4       | 1394.676174 | -0.268507575 | 0.084987277 | 0.000992642 | 0.005909105 |
| EXOSC6       | 730.3993197 | -0.268397605 | 0.106537062 | 0.007172804 | 0.03111509  |
| RPL27A       | 39609.0962  | -0.268232178 | 0.063122047 | 1.41E-05    | 0.000138643 |
| DDX19B       | 1291.103056 | -0.268176384 | 0.089484387 | 0.001714803 | 0.009430053 |
| P3H1         | 726.8530633 | -0.268072575 | 0.104761673 | 0.006470215 | 0.028548422 |
| UBP1         | 2673.563262 | -0.268025479 | 0.077926001 | 0.000368769 | 0.002498426 |
| RPS8         | 73072.73008 | -0.268008288 | 0.066845379 | 4.20E-05    | 0.000367739 |
| CTBP1        | 1870.824133 | 0.26800635   | 0.090635721 | 0.001923778 | 0.010387921 |
| RINT1        | 1098.440908 | -0.267976899 | 0.092508225 | 0.002348813 | 0.012303205 |
| RPS26P7      | 546.431145  | -0.267950321 | 0.108122749 | 0.008002893 | 0.033917301 |
| RPLP0        | 91269.6176  | -0.267900459 | 0.080695155 | 0.000555663 | 0.003575777 |
| DNAJC2       | 854.6058602 | -0.267795528 | 0.105654019 | 0.006881699 | 0.030055583 |
| SLAIN2       | 3905.746187 | 0.267766272  | 0.086782816 | 0.001267935 | 0.007251262 |
| TNIP2        | 333.1909341 | 0.267741172  | 0.127627452 | 0.021067728 | 0.074062087 |
| NDUFA4       | 8722.341988 | -0.267656234 | 0.085007477 | 0.00103725  | 0.006128303 |
| POMP         | 4655.790919 | -0.267609267 | 0.073551498 | 0.000176451 | 0.001307488 |

|              |             |              |             |             |             |
|--------------|-------------|--------------|-------------|-------------|-------------|
| NCR3LG1      | 1731.271126 | -0.267468988 | 0.075953418 | 0.000273007 | 0.001917913 |
| ZC3H18       | 1071.475634 | -0.267395134 | 0.101910575 | 0.005356276 | 0.024421968 |
| EPB41        | 3103.61173  | 0.267338923  | 0.081685086 | 0.000660399 | 0.004158591 |
| CHD6         | 833.3484974 | 0.267283705  | 0.098886209 | 0.004207135 | 0.019949332 |
| ZNF346       | 283.796926  | 0.267119457  | 0.132941449 | 0.026129518 | 0.087777191 |
| GTF2E2       | 1173.366799 | -0.267117024 | 0.083587011 | 0.000878465 | 0.005313441 |
| MRPL16       | 1957.323043 | -0.267088208 | 0.07602544  | 0.000280061 | 0.001960312 |
| PRKAG1       | 1922.82629  | 0.267066431  | 0.088667418 | 0.001616998 | 0.00897486  |
| ATF4         | 13189.667   | -0.266818131 | 0.068946602 | 7.02E-05    | 0.000581465 |
| YIF1A        | 1073.558619 | -0.266782478 | 0.122293212 | 0.017556493 | 0.063965031 |
| TBC1D1       | 590.8232984 | 0.266745304  | 0.098837272 | 0.004227404 | 0.020023509 |
| SH3BP2       | 694.9496175 | -0.266683866 | 0.100433375 | 0.004919044 | 0.022776227 |
| HPS5         | 440.3353371 | 0.266512744  | 0.126067195 | 0.020446642 | 0.072171728 |
| ACOT8        | 604.242669  | 0.266506899  | 0.105299733 | 0.006967422 | 0.030353419 |
| CBX2         | 633.8036866 | 0.266482561  | 0.122334119 | 0.017608211 | 0.064073559 |
| GFPT1        | 4706.199228 | -0.266464997 | 0.101036527 | 0.005218356 | 0.023924628 |
| NOP53        | 8534.34535  | -0.266423213 | 0.089701874 | 0.001898358 | 0.010273084 |
| NIPSNAP3A    | 412.6456265 | -0.266404803 | 0.134659674 | 0.02817562  | 0.093117277 |
| NOP14        | 797.3471983 | -0.266358063 | 0.094685768 | 0.003051128 | 0.01530602  |
| RNF5         | 1343.423056 | 0.266341623  | 0.095450021 | 0.003266351 | 0.016202634 |
| CCNQ         | 548.0474619 | 0.266266652  | 0.12648624  | 0.021015325 | 0.073892871 |
| LINC02246    | 3.23318912  | 0.266255169  | 0.506321053 | 0.000861353 | 0.005224537 |
| USP14        | 4927.553726 | -0.266221671 | 0.077492087 | 0.000379093 | 0.002561355 |
| MBD3         | 1770.69965  | 0.266126347  | 0.111052491 | 0.010062247 | 0.041009161 |
| SAP30L       | 612.3319564 | 0.266120964  | 0.101643077 | 0.005419354 | 0.024664112 |
| DAGLB        | 343.7262112 | 0.265911511  | 0.129319032 | 0.023571492 | 0.08098959  |
| ARHGAP1      | 751.0749643 | 0.265769797  | 0.112616922 | 0.011103247 | 0.044356194 |
| H3C13        | 47.57015424 | 0.26571145   | 0.513107527 | 0.000785103 | 0.00483658  |
| USP39        | 4065.604676 | 0.26558725   | 0.067931903 | 5.84E-05    | 0.000493937 |
| RPL36A       | 9580.755347 | -0.265539093 | 0.06779389  | 5.79E-05    | 0.000490415 |
| USP28        | 1061.964981 | 0.26542651   | 0.091160431 | 0.002243811 | 0.011839146 |
| GPATCH4      | 1484.232204 | -0.265375    | 0.098988076 | 0.004570751 | 0.021398134 |
| VPS33A       | 1259.941986 | -0.26534874  | 0.082553839 | 0.000829473 | 0.005064875 |
| POLR3A       | 734.5529196 | -0.265343943 | 0.103343125 | 0.006319388 | 0.027995098 |
| ARHGAP30     | 6948.270292 | -0.265252481 | 0.070788538 | 0.000115048 | 0.000898237 |
| RHOH         | 1128.522917 | 0.265227968  | 0.082323892 | 0.000804603 | 0.004933893 |
| LARP7        | 758.7873699 | -0.264852027 | 0.108508542 | 0.008994636 | 0.037307811 |
| BDH1         | 735.6759066 | 0.264774524  | 0.099212203 | 0.004755392 | 0.022142814 |
| TMA16        | 799.9087035 | 0.264686458  | 0.131516397 | 0.026108302 | 0.087755721 |
| RIPK1        | 737.2831741 | 0.264670954  | 0.093117724 | 0.002764448 | 0.014104875 |
| ZKSCAN1      | 1467.146325 | -0.264659128 | 0.080708529 | 0.000662765 | 0.004168946 |
| SIDT2        | 736.4259088 | -0.264654838 | 0.112919965 | 0.011743273 | 0.046228293 |
| YBEY         | 534.9887152 | -0.264630923 | 0.107751413 | 0.008643589 | 0.03608697  |
| TICRR        | 578.8622188 | 0.264574295  | 0.10585922  | 0.007635922 | 0.032690053 |
| DCTN6        | 616.1565578 | -0.264570744 | 0.116378375 | 0.013973653 | 0.053327588 |
| RPA3         | 2081.226455 | -0.264464464 | 0.089445899 | 0.001864945 | 0.010127078 |
| ZNF8-ERVK3-1 | 464.8180833 | 0.264412423  | 0.109051865 | 0.009371791 | 0.038629336 |
| PAQR4        | 383.1616807 | -0.264367191 | 0.119451235 | 0.016341408 | 0.060209397 |
| CARD11       | 1046.721447 | 0.264168176  | 0.10275397  | 0.006260853 | 0.027778426 |
| FCF1         | 923.9348935 | 0.264092773  | 0.100483306 | 0.005301565 | 0.024204375 |



|          |             |              |             |             |             |
|----------|-------------|--------------|-------------|-------------|-------------|
| ATAD3B   | 812.4431337 | -0.264074075 | 0.1108342   | 0.010612555 | 0.042778773 |
| H4C3     | 63.44924453 | 0.264072219  | 0.512977161 | 0.000417516 | 0.002788325 |
| P4HA2    | 534.3287261 | 0.263847138  | 0.112556441 | 0.011661615 | 0.046019961 |
| INPP5B   | 396.4009756 | 0.263781016  | 0.115993655 | 0.013960001 | 0.053318335 |
| POMT1    | 589.5726474 | 0.263456198  | 0.115104961 | 0.013455295 | 0.051813507 |
| SNORD45B | 4.587180814 | -0.263403937 | 0.478736427 | 0.015697908 | 0.058397567 |
| TM9SF3   | 6341.371692 | -0.263316513 | 0.118940862 | 0.016285022 | 0.060065542 |
| SRSF11   | 2286.512227 | -0.263229318 | 0.116715811 | 0.014742626 | 0.055559969 |
| HARS2    | 867.1277353 | -0.262848317 | 0.092708964 | 0.002905937 | 0.014688299 |
| MSTO1    | 912.4102957 | -0.26273611  | 0.105456683 | 0.007971809 | 0.033810387 |
| NCBP3    | 1640.124426 | 0.2625253    | 0.081953639 | 0.000859629 | 0.005215905 |
| HLA-DRB5 | 2561.214982 | -0.262451811 | 0.087028577 | 0.001637401 | 0.009079368 |
| RELB     | 1003.245883 | 0.262396252  | 0.126720431 | 0.023112258 | 0.079728083 |
| ATAD1    | 2240.075406 | -0.262224138 | 0.107564658 | 0.009168777 | 0.037899473 |
| KBTBD8   | 1138.282602 | -0.262196419 | 0.131294641 | 0.027512023 | 0.091409381 |
| RNF144A  | 1064.362305 | -0.262108963 | 0.098531335 | 0.004904419 | 0.022714584 |
| BRAF     | 1019.045987 | -0.262070479 | 0.111742648 | 0.011716356 | 0.04614331  |
| MKS1     | 344.4067758 | -0.261831243 | 0.126690559 | 0.023474008 | 0.080718703 |
| MRPL34   | 2119.613422 | 0.261719084  | 0.100888933 | 0.005897187 | 0.026401652 |
| PHAF1    | 620.1691722 | -0.261645268 | 0.108117845 | 0.00967958  | 0.039720684 |
| XRN1     | 996.7014012 | 0.261614737  | 0.125152065 | 0.022009332 | 0.076795405 |
| RPS25P2  | 4128.684035 | -0.261607674 | 0.082877398 | 0.001029424 | 0.006094539 |
| XPO7     | 2011.973963 | -0.261580477 | 0.072137309 | 0.000189083 | 0.001390492 |
| XRCC1    | 523.6785211 | 0.261470325  | 0.109274312 | 0.010311609 | 0.041848168 |
| CD37     | 740.3953979 | 0.261172799  | 0.106820496 | 0.009002207 | 0.037330275 |
| RUSF1    | 1275.230942 | -0.261161164 | 0.089250277 | 0.002213064 | 0.011691161 |
| TSPAN14  | 896.8136121 | 0.261115505  | 0.112821741 | 0.012727769 | 0.04938534  |
| CYB5D2   | 326.5678274 | 0.261029901  | 0.127021464 | 0.024021702 | 0.08217776  |
| RBM19    | 398.080413  | -0.261029612 | 0.115051839 | 0.014414726 | 0.054651753 |
| TBC1D7   | 431.0418526 | -0.261007771 | 0.109856223 | 0.010919504 | 0.043731047 |
| WBP2     | 1489.44183  | 0.260835779  | 0.093813162 | 0.003432412 | 0.016881307 |
| NCKAP1L  | 1523.537298 | -0.260735682 | 0.078119951 | 0.000546071 | 0.003515357 |
| RPL5P4   | 1219.183515 | -0.260590162 | 0.081232118 | 0.00086372  | 0.005235223 |
| DLD      | 3811.102111 | -0.260465798 | 0.097882003 | 0.004942043 | 0.022858267 |
| ACER3    | 500.4984884 | 0.260451191  | 0.119695527 | 0.018052087 | 0.065371808 |
| UBE2S    | 3521.993642 | 0.260409103  | 0.109869497 | 0.011005934 | 0.044006413 |
| WASHC3   | 580.7529803 | 0.260407411  | 0.105530723 | 0.008478035 | 0.03553101  |
| ROBO3    | 4.440191396 | 0.260356819  | 0.470514342 | 0.019932567 | 0.070727246 |
| POC5     | 666.2509682 | 0.26030942   | 0.099817286 | 0.005702679 | 0.025670207 |
| UBE2E3   | 1023.081607 | 0.260214374  | 0.094294905 | 0.003662222 | 0.017764342 |
| MRPL51   | 4180.261614 | -0.260163568 | 0.069811641 | 0.000128548 | 0.000990685 |
| CEP78    | 554.6564629 | 0.260121264  | 0.103698756 | 0.007558547 | 0.032398852 |
| RPL32P18 | 1519.882362 | -0.260082726 | 0.089850031 | 0.002446967 | 0.012740856 |
| FARSB    | 5968.623597 | -0.259996227 | 0.0655622   | 4.80E-05    | 0.000414315 |
| MYOF     | 3.381956076 | 0.259920463  | 0.48725347  | 0.005430387 | 0.024697741 |
| EFR3A    | 1208.822835 | 0.259847726  | 0.106670664 | 0.009265534 | 0.038239097 |
| RPS26P25 | 1629.843285 | -0.259837924 | 0.079033445 | 0.000655129 | 0.004132918 |
| NCL      | 38598.4019  | -0.259824178 | 0.08550646  | 0.001532374 | 0.008551763 |
| RPS17    | 58553.41158 | -0.259768287 | 0.067210406 | 8.11E-05    | 0.000659717 |
| UTP3     | 1113.335211 | -0.259687248 | 0.10095412  | 0.006365605 | 0.028185421 |

|          |             |              |             |             |             |
|----------|-------------|--------------|-------------|-------------|-------------|
| RNF44    | 839.8307033 | 0.259612199  | 0.114600975 | 0.014498758 | 0.054867788 |
| OTUD4    | 1282.414248 | -0.259502684 | 0.116699629 | 0.016180415 | 0.059781576 |
| PRDM2    | 1567.823195 | -0.259331822 | 0.089950893 | 0.002552082 | 0.013172698 |
| OIP5     | 319.5281651 | 0.259184686  | 0.12975546  | 0.027701187 | 0.091923824 |
| DDX10    | 1939.703978 | -0.259135725 | 0.090126434 | 0.002630355 | 0.013492973 |
| ACTB     | 101862.7806 | 0.2589677    | 0.060905751 | 1.39E-05    | 0.000136207 |
| SACM1L   | 1431.21335  | -0.25894056  | 0.087353304 | 0.001950079 | 0.010513547 |
| MLXIP    | 652.3598351 | 0.25884638   | 0.119663031 | 0.018771578 | 0.067371485 |
| RPL12P6  | 818.959503  | -0.258814985 | 0.099212149 | 0.005797543 | 0.026029572 |
| RNF115   | 3254.779129 | 0.258622257  | 0.076652468 | 0.000476745 | 0.003129108 |
| SAMD12   | 386.4339583 | 0.258481494  | 0.127181825 | 0.025607665 | 0.086442093 |
| EBPL     | 2102.486658 | -0.258449188 | 0.080012546 | 0.000804229 | 0.004933346 |
| WDR48    | 1806.841184 | -0.258435746 | 0.086666185 | 0.001844617 | 0.010029274 |
| RFTN1    | 578.8781563 | -0.25842843  | 0.099252379 | 0.005864842 | 0.026283453 |
| PRMT6    | 841.7395765 | 0.258425425  | 0.093708744 | 0.00369899  | 0.017897299 |
| VAC14    | 1004.781862 | -0.258396451 | 0.100823287 | 0.006599384 | 0.029005464 |
| FBXO45   | 1604.060022 | 0.258050665  | 0.114924485 | 0.015301468 | 0.057217777 |
| NUMA1    | 874.9118975 | 0.258031916  | 0.119080466 | 0.018615698 | 0.066886007 |
| CNIH1    | 3584.826876 | -0.257978082 | 0.102851502 | 0.007695218 | 0.032911358 |
| CHKA     | 1196.828747 | -0.257916013 | 0.088228281 | 0.002259448 | 0.011910764 |
| BEND5    | 3.876516145 | 0.257831913  | 0.478726107 | 0.011587662 | 0.045824055 |
| COQ9     | 911.7280623 | -0.257829704 | 0.095133344 | 0.004309153 | 0.020332861 |
| NOL12    | 448.1372341 | 0.257749569  | 0.112465884 | 0.013635042 | 0.052359016 |
| SNAPC5   | 720.0711222 | 0.257748633  | 0.100308612 | 0.006397451 | 0.028273287 |
| TAF1D    | 1254.50068  | -0.257733238 | 0.095968801 | 0.00461728  | 0.021575133 |
| ETFA     | 5021.166413 | -0.257627244 | 0.078658964 | 0.000689151 | 0.004316102 |
| SNORA22  | 5.830595568 | 0.257495105  | 0.482171616 | 0.007147217 | 0.031019639 |
| TAPT1    | 525.3646039 | 0.257325286  | 0.117969591 | 0.017920359 | 0.06500353  |
| GOT1     | 4359.143135 | 0.257320575  | 0.068740907 | 0.00011709  | 0.000912124 |
| EXOSC3   | 588.156574  | 0.257279666  | 0.101805704 | 0.00727752  | 0.031459015 |
| NEDD1    | 682.7391753 | 0.25724771   | 0.127604672 | 0.026636018 | 0.089217781 |
| SIAH1    | 425.5392206 | -0.257174949 | 0.124472286 | 0.023856567 | 0.081730313 |
| ACSF2    | 503.3388174 | -0.2569972   | 0.115632005 | 0.016440794 | 0.060498348 |
| RPS25    | 43142.83597 | -0.256996515 | 0.0698563   | 0.00015475  | 0.001165133 |
| CIZ1     | 674.7450363 | 0.2569142    | 0.112495347 | 0.01393581  | 0.053285187 |
| MIA2     | 644.1497819 | 0.256843785  | 0.102110296 | 0.007514107 | 0.032256268 |
| HSPE1P2  | 839.8958549 | -0.256789334 | 0.11830918  | 0.018616998 | 0.066886007 |
| ZCCHC9   | 629.4354788 | -0.256713299 | 0.113774263 | 0.015021445 | 0.05636541  |
| PPP4R3A  | 3085.021354 | -0.256393939 | 0.082057727 | 0.001152266 | 0.006713034 |
| MYO1C    | 1221.490718 | 0.256354387  | 0.091520203 | 0.003274315 | 0.016232843 |
| HLA-DOA  | 797.1639888 | -0.256127533 | 0.092191967 | 0.003529731 | 0.01726189  |
| MINPP1   | 928.0820142 | 0.256111346  | 0.102196127 | 0.00772877  | 0.033022235 |
| CBX5     | 4862.974373 | -0.2560646   | 0.105307348 | 0.009536687 | 0.039227271 |
| PELO     | 1143.626384 | -0.256045049 | 0.082277263 | 0.001215644 | 0.007010095 |
| UQCRHL   | 1971.122826 | -0.256042885 | 0.107431589 | 0.010740788 | 0.043195129 |
| ZC3H12C  | 877.9401813 | 0.255989974  | 0.125689321 | 0.025563697 | 0.086349875 |
| GIT1     | 794.232044  | -0.255456027 | 0.097821813 | 0.005795991 | 0.026029349 |
| PRDX1    | 15941.97735 | -0.255426782 | 0.064673861 | 5.20E-05    | 0.000445645 |
| RPL26    | 52018.36366 | -0.255214585 | 0.067194192 | 9.61E-05    | 0.000767823 |
| ARHGAP19 | 800.6593404 | 0.255209166  | 0.100022854 | 0.006852672 | 0.029938199 |

|           |             |              |             |             |             |
|-----------|-------------|--------------|-------------|-------------|-------------|
| SUCLA2    | 1832.619815 | -0.255200842 | 0.108895667 | 0.012043123 | 0.047162091 |
| MMUT      | 1153.104245 | -0.25513707  | 0.087955086 | 0.002424947 | 0.012645659 |
| SIAE      | 1006.312063 | -0.255129942 | 0.084945981 | 0.001744505 | 0.009574656 |
| SYNC      | 4.619406644 | 0.255010399  | 0.478966406 | 0.007961174 | 0.033773553 |
| CAPN1     | 2690.626314 | 0.254796564  | 0.091630384 | 0.003503022 | 0.017160348 |
| EVC2      | 3.79346854  | 0.254702045  | 0.47299295  | 0.012587121 | 0.048982288 |
| NAA20     | 2211.660536 | -0.254585041 | 0.08011049  | 0.00097433  | 0.005820098 |
| SDHAF2    | 907.1190921 | 0.254570309  | 0.088517907 | 0.002611156 | 0.013417624 |
| CDK11B    | 453.0593526 | 0.2545614    | 0.129140156 | 0.029888597 | 0.097527952 |
| SPC25     | 1047.342543 | 0.254441262  | 0.105006428 | 0.009785905 | 0.04009998  |
| SNX4      | 1518.627211 | -0.254367429 | 0.11395601  | 0.01580547  | 0.058703211 |
| PCCB      | 3569.583074 | -0.25433376  | 0.07683479  | 0.000618707 | 0.003934688 |
| TRAPPC6A  | 1002.769139 | -0.254254555 | 0.10119193  | 0.007735132 | 0.033041265 |
| RPL35P1   | 995.6503962 | 0.254226512  | 0.093679576 | 0.004300301 | 0.020296625 |
| IFIH1     | 533.0895489 | 0.253871657  | 0.114273261 | 0.016514265 | 0.060687424 |
| TRMT112P6 | 328.2266898 | -0.253495084 | 0.126918633 | 0.028588791 | 0.094245591 |
| PLEKHA8   | 666.7608654 | -0.253466117 | 0.10545114  | 0.010402915 | 0.042139713 |
| PCNX1     | 870.8557692 | 0.253358208  | 0.093380408 | 0.004273622 | 0.020203357 |
| ADORA2A   | 870.0935926 | -0.253343094 | 0.112572812 | 0.015581204 | 0.057988332 |
| NCOA1     | 738.9479569 | 0.253303245  | 0.095101762 | 0.004949466 | 0.022880381 |
| UTP14C    | 653.0061331 | -0.253139005 | 0.102597662 | 0.008732173 | 0.036402273 |
| KDELR2    | 4568.584943 | -0.253058091 | 0.07925865  | 0.000932288 | 0.005597933 |
| TRIM38    | 325.1896494 | 0.253047397  | 0.122221165 | 0.023882181 | 0.081789562 |
| INPP5D    | 1798.346327 | 0.252953604  | 0.08381434  | 0.001665792 | 0.009201443 |
| IL2RG     | 16223.34435 | 0.25284475   | 0.068002755 | 0.000133098 | 0.001020303 |
| SETDB1    | 3141.07157  | 0.252786253  | 0.074074582 | 0.000423874 | 0.002825339 |
| ERFE      | 3.832709407 | 0.252410712  | 0.469244085 | 0.01262167  | 0.049094666 |
| UCHL3     | 1294.818944 | -0.252391015 | 0.079914594 | 0.001053612 | 0.006214372 |
| MED21     | 1205.424722 | 0.252390292  | 0.117859131 | 0.020193794 | 0.071468615 |
| PLSCR1    | 422.2536812 | 0.252098494  | 0.111149661 | 0.014709937 | 0.055502175 |
| LEMD2     | 352.9892782 | 0.2520412    | 0.127663814 | 0.03008935  | 0.09797993  |
| ST3GAL5   | 1132.46648  | 0.251842185  | 0.08394764  | 0.001772897 | 0.009694115 |
| H2BU2P    | 5.116101717 | 0.25181371   | 0.463112574 | 0.015508112 | 0.057814605 |
| ZFYVE27   | 533.152786  | 0.251544193  | 0.107513213 | 0.012355034 | 0.048235176 |
| NFE2L2    | 5180.791912 | -0.251527028 | 0.086034102 | 0.002278918 | 0.011991501 |
| MCCC2     | 4425.935808 | -0.251492866 | 0.066927706 | 0.000116175 | 0.000906629 |
| HNRNPUL1  | 7478.582979 | 0.251203807  | 0.071795803 | 0.000309029 | 0.002139728 |
| MICOS10   | 2412.66711  | -0.251011562 | 0.105820695 | 0.011323225 | 0.045056132 |
| KRT8P32   | 3.176249968 | -0.250988753 | 0.478440543 | 0.001246144 | 0.007140794 |
| PTEN      | 2496.30593  | 0.250800853  | 0.117333739 | 0.020126011 | 0.071257849 |
| MYDGF     | 6382.66647  | -0.250650275 | 0.078640346 | 0.000964575 | 0.005765806 |
| SLC36A1   | 299.0831717 | 0.250646469  | 0.125257822 | 0.028403716 | 0.093760418 |
| ZNF480    | 771.3872313 | 0.250625531  | 0.10602243  | 0.011557588 | 0.045746914 |
| GLG1      | 5127.298323 | -0.250598138 | 0.063615287 | 5.66E-05    | 0.000480141 |
| UBR4      | 3495.706345 | 0.250445032  | 0.089006109 | 0.003204643 | 0.015974326 |
| RNF38     | 775.3760556 | 0.250340376  | 0.105880107 | 0.011581906 | 0.045811756 |
| TERF1     | 791.9125993 | -0.250315343 | 0.101081256 | 0.008632842 | 0.036057627 |
| RIOK1     | 711.6352141 | 0.250314614  | 0.092852484 | 0.004572798 | 0.021401643 |
| BRMS1     | 1250.392377 | 0.250159415  | 0.094267398 | 0.005199516 | 0.02385798  |
| GAS7      | 1453.840819 | 0.250099621  | 0.089072891 | 0.00325972  | 0.016188289 |

|              |             |              |             |             |             |
|--------------|-------------|--------------|-------------|-------------|-------------|
| TBL1X        | 1693.50421  | 0.24984629   | 0.077293957 | 0.000814193 | 0.004990933 |
| MLEC         | 8737.917848 | -0.2498133   | 0.066746478 | 0.000117223 | 0.000912749 |
| MAGT1        | 2096.918274 | -0.249757518 | 0.103694519 | 0.010356644 | 0.042001405 |
| KANSL2       | 1700.915956 | 0.249510495  | 0.07911093  | 0.001068423 | 0.006291019 |
| TUBBP2       | 1828.891582 | 0.249477547  | 0.075718619 | 0.00065651  | 0.004140126 |
| CLASP1       | 995.9794846 | 0.249475877  | 0.084444211 | 0.002069926 | 0.011039782 |
| WDR6         | 2386.772921 | -0.24947352  | 0.086885611 | 0.002709366 | 0.013856492 |
| CNOT10       | 1017.241151 | -0.249314139 | 0.090944109 | 0.004045909 | 0.01927986  |
| PRIM1        | 1054.655472 | 0.249262553  | 0.102246224 | 0.009556732 | 0.039291056 |
| MEPCE        | 2804.00096  | -0.249173538 | 0.085487225 | 0.002375001 | 0.012421591 |
| MICB         | 724.4861173 | 0.249013612  | 0.095328131 | 0.005866232 | 0.026283453 |
| KLHDC4       | 1076.448333 | -0.249004634 | 0.088549806 | 0.003263666 | 0.016202634 |
| HLA-DQA1     | 3311.554407 | -0.248974039 | 0.074005748 | 0.000519364 | 0.003374896 |
| ELL2P1       | 405.2146738 | -0.2488948   | 0.125968007 | 0.030377552 | 0.098584721 |
| AKR1B1       | 6794.109538 | -0.248662557 | 0.095148184 | 0.005912359 | 0.026450126 |
| TTC5         | 588.5132244 | 0.248592721  | 0.103249896 | 0.01045089  | 0.042294476 |
| ANAPC1P2     | 512.0261082 | 0.248478633  | 0.115794138 | 0.020387475 | 0.071977553 |
| NACC1        | 1905.264347 | 0.248413205  | 0.092544807 | 0.004780535 | 0.022247923 |
| GSR          | 1941.438649 | -0.248309153 | 0.074673786 | 0.000595487 | 0.003805187 |
| CAMLG        | 776.0197394 | -0.24829892  | 0.102474634 | 0.010055687 | 0.041001725 |
| ZNF544       | 1420.428984 | 0.248281725  | 0.08005203  | 0.00128583  | 0.007343903 |
| PLOD1        | 3084.096521 | -0.248207006 | 0.083693062 | 0.002020228 | 0.010820996 |
| TXNDC16      | 657.1683021 | -0.248174146 | 0.110999935 | 0.016382083 | 0.060320761 |
| ELOA         | 1619.112891 | 0.248134064  | 0.087252223 | 0.00294546  | 0.014846526 |
| KRI1         | 388.438682  | 0.248082929  | 0.119596914 | 0.024157394 | 0.082544119 |
| SLC39A7      | 2877.102868 | -0.247974377 | 0.07299501  | 0.000459635 | 0.003034503 |
| INSR         | 1376.311758 | -0.247845775 | 0.091271841 | 0.004358914 | 0.020528508 |
| FLNB         | 1606.49803  | 0.24783793   | 0.077889872 | 0.000978133 | 0.005836776 |
| CCDC34       | 527.1298439 | -0.247788223 | 0.107737971 | 0.013939605 | 0.053285187 |
| EEF1A1P43    | 1771.651779 | -0.247763905 | 0.091786663 | 0.004593973 | 0.021472019 |
| MET          | 1942.683891 | 0.247724685  | 0.076644993 | 0.00082097  | 0.005023583 |
| ARHGAP21     | 1037.630785 | 0.247722211  | 0.094799256 | 0.005870052 | 0.026293766 |
| RPL26L1      | 1115.651537 | -0.24754312  | 0.093483781 | 0.005385432 | 0.024535525 |
| RPS24        | 52464.799   | -0.247449344 | 0.080850627 | 0.001499867 | 0.008400129 |
| COPS9        | 1816.574645 | -0.247370027 | 0.116438685 | 0.021526658 | 0.07532373  |
| SHQ1         | 944.2709544 | -0.247308241 | 0.098984602 | 0.008182092 | 0.034516269 |
| TOMM20       | 5275.201975 | -0.24725088  | 0.090526754 | 0.004201568 | 0.019937364 |
| NOTCH2NLB    | 1760.035709 | 0.247172225  | 0.087737149 | 0.003214298 | 0.016013232 |
| PIGM         | 1033.083281 | -0.247139979 | 0.091245487 | 0.004491883 | 0.021063073 |
| ADPGK        | 1749.889315 | -0.247065471 | 0.082700261 | 0.001892911 | 0.010256425 |
| SCDP1        | 409.2762823 | -0.247051619 | 0.110658515 | 0.016587006 | 0.060906952 |
| INTS8        | 866.444234  | -0.247026118 | 0.091909623 | 0.004774788 | 0.022227153 |
| RNF103-CHMP3 | 850.6940823 | 0.246703526  | 0.088710821 | 0.003582582 | 0.017475937 |
| SAP130       | 527.0383982 | 0.246607062  | 0.116383683 | 0.02186051  | 0.076306885 |
| DSTN         | 2552.732315 | -0.246603894 | 0.102627883 | 0.010685876 | 0.043034261 |
| GBE1         | 2802.033679 | -0.246473532 | 0.084766591 | 0.002444423 | 0.01273468  |
| PXMP2        | 503.7102257 | 0.246348666  | 0.118475914 | 0.024117664 | 0.082440899 |
| GTF2H3       | 624.6696284 | 0.246339037  | 0.107101034 | 0.013902641 | 0.053193116 |
| TIMM8B       | 599.8458095 | -0.246291742 | 0.115872007 | 0.021768789 | 0.076088139 |
| SLC2A1       | 958.5847048 | 0.24624498   | 0.102472517 | 0.010656922 | 0.042937628 |

|                |             |              |             |             |             |
|----------------|-------------|--------------|-------------|-------------|-------------|
| FBXL20         | 544.6107702 | 0.246179112  | 0.11220864  | 0.01825579  | 0.065915714 |
| KLF9           | 712.7971181 | -0.245933889 | 0.109701215 | 0.016222477 | 0.05985351  |
| NDUFB5         | 4578.610636 | 0.245908567  | 0.083743397 | 0.002211072 | 0.011687969 |
| RPL36A-HNRNPH2 | 10646.42446 | -0.245828659 | 0.065389666 | 0.000117537 | 0.000914779 |
| ZNF428         | 521.2026756 | 0.245793268  | 0.116083047 | 0.022061081 | 0.076944963 |
| H4-16          | 7.320737188 | 0.245768861  | 0.451692337 | 0.018860279 | 0.067591773 |
| CNTNAP3B       | 4.128939733 | 0.245647462  | 0.446770042 | 0.026069875 | 0.087660588 |
| PDE4DIP        | 1520.593998 | 0.245615408  | 0.090508988 | 0.00439082  | 0.020650687 |
| NOTCH2NLA      | 1785.649969 | 0.245557015  | 0.08425055  | 0.002383525 | 0.01244924  |
| WDR61          | 1793.184532 | -0.245536056 | 0.088134631 | 0.003574371 | 0.017453734 |
| MINDY3         | 419.9907664 | 0.245386961  | 0.118332556 | 0.024427804 | 0.083287317 |
| HMGNA4         | 2131.098331 | 0.245353915  | 0.098115732 | 0.008149239 | 0.034445092 |
| LOC105374942   | 3.295039973 | 0.245188573  | 0.463723871 | 0.006128141 | 0.027296621 |
| HSPA4          | 3073.8883   | -0.245186231 | 0.072076473 | 0.000456115 | 0.003017686 |
| CREB3          | 980.2390724 | -0.24513767  | 0.097964447 | 0.008214747 | 0.034628717 |
| COQ4           | 578.8347086 | 0.24505296   | 0.107818809 | 0.015051915 | 0.056455276 |
| LOC100129034   | 708.6897691 | 0.244997616  | 0.109670588 | 0.016595875 | 0.060913684 |
| TRNT           | 409.9839984 | -0.244988333 | 0.122751671 | 0.029505667 | 0.096533089 |
| PDCD4          | 2541.731718 | -0.244967889 | 0.0981773   | 0.008352202 | 0.035114126 |
| DCTN4          | 1569.873658 | 0.244946537  | 0.087750918 | 0.003483343 | 0.017080462 |
| PALS2          | 790.8909985 | -0.244818058 | 0.120296004 | 0.02687486  | 0.089792002 |
| NUDT2          | 486.4818741 | -0.244689078 | 0.117476979 | 0.024180277 | 0.08260601  |
| NBN            | 1692.918539 | -0.244337076 | 0.098073462 | 0.008447354 | 0.035427898 |
| RPL15          | 35585.18656 | -0.244232499 | 0.074942454 | 0.000925981 | 0.005565848 |
| MAN1B1         | 665.5705717 | 0.243920627  | 0.105971353 | 0.014016593 | 0.053451956 |
| WWTR1          | 4.770369721 | 0.24391099   | 0.442377282 | 0.02844034  | 0.093827656 |
| CNOT6          | 2137.319528 | 0.24389532   | 0.10837694  | 0.016119353 | 0.059606841 |
| BLOC1S5-TXNDC5 | 89734.28989 | -0.243685787 | 0.069070179 | 0.000310508 | 0.002147391 |
| MCRS1          | 2434.995868 | 0.243488427  | 0.096901396 | 0.008151342 | 0.034445092 |
| BTRC           | 479.9558473 | -0.243481607 | 0.106758609 | 0.014848323 | 0.05588533  |
| MED13L         | 1726.502202 | 0.243438151  | 0.086944403 | 0.003408675 | 0.016788402 |
| AGPAT5         | 3187.930282 | -0.24337725  | 0.10059041  | 0.010338309 | 0.041936872 |
| TXNDC5         | 90479.96824 | -0.24329789  | 0.071412278 | 0.000444016 | 0.002942603 |
| MARCHF5        | 776.2283132 | 0.243163126  | 0.117162679 | 0.024511734 | 0.083540582 |
| LSM4           | 4240.083574 | -0.243155124 | 0.079787876 | 0.001575357 | 0.008774671 |
| PBX2           | 771.8976457 | -0.243117474 | 0.095868287 | 0.007493138 | 0.03218221  |
| UIMC1          | 849.767753  | -0.243104668 | 0.090705501 | 0.00493635  | 0.022844142 |
| TIMM10         | 1250.1579   | 0.242927648  | 0.091390735 | 0.005263011 | 0.024091875 |
| TGDS           | 673.8163169 | -0.242898447 | 0.119378742 | 0.02718037  | 0.090569059 |
| NOM1           | 814.8745378 | -0.242758516 | 0.100493578 | 0.010456158 | 0.042296028 |
| RLF            | 758.0756362 | -0.242689499 | 0.105130402 | 0.01385227  | 0.053012102 |
| ZNF778         | 469.7131618 | -0.2426745   | 0.114936553 | 0.022642026 | 0.078559802 |
| PPFIBP1        | 409.9140165 | -0.242635004 | 0.112195818 | 0.020030184 | 0.070991137 |
| VAV2           | 482.8609666 | 0.242600614  | 0.108042623 | 0.016212577 | 0.059849327 |
| SOAT1          | 892.1236642 | 0.242555183  | 0.095925457 | 0.007604484 | 0.03257157  |
| CASP3          | 3010.897268 | 0.242530199  | 0.084983076 | 0.002907832 | 0.014693588 |
| ATP6V1F        | 2399.597485 | -0.242508218 | 0.082800287 | 0.002321824 | 0.012176566 |
| FAM13B         | 1029.84915  | 0.242418538  | 0.108024776 | 0.016224079 | 0.05985351  |
| CCDC59         | 850.4222707 | -0.242344484 | 0.098010334 | 0.00896033  | 0.037192243 |
| NTAQ1          | 437.4875284 | -0.242209711 | 0.114261966 | 0.022308574 | 0.077667384 |

|           |             |              |             |             |             |
|-----------|-------------|--------------|-------------|-------------|-------------|
| CHASERR   | 1296.118718 | 0.242191404  | 0.081150546 | 0.001930646 | 0.010418511 |
| GAGE10    | 1413.914779 | -0.242179542 | 0.084694177 | 0.002885035 | 0.014608234 |
| UBXN2A    | 707.6923766 | 0.241876031  | 0.105041539 | 0.014035489 | 0.053500453 |
| ATG3      | 3536.776056 | 0.241869156  | 0.075687677 | 0.000945776 | 0.005671051 |
| IST1      | 4253.896529 | -0.241364336 | 0.073897468 | 0.000754036 | 0.004673073 |
| TM2D3     | 750.7262379 | -0.241331158 | 0.104727165 | 0.014097908 | 0.053658504 |
| PTTG1IP   | 3011.103918 | 0.241155183  | 0.082233579 | 0.002284746 | 0.012011214 |
| MPZL3     | 981.7601927 | -0.241153922 | 0.099870046 | 0.010528335 | 0.042548232 |
| FTH1P20   | 567.8418874 | 0.240993922  | 0.109675267 | 0.018413549 | 0.066361589 |
| ANO10     | 623.4226551 | -0.240814467 | 0.10371664  | 0.013553284 | 0.05210973  |
| ITM2C     | 2066.358164 | 0.240733307  | 0.081342093 | 0.00209903  | 0.011177398 |
| CHMP4B    | 2885.100722 | 0.240635763  | 0.073334467 | 0.000706929 | 0.004408316 |
| DENND10   | 854.0963994 | 0.240603303  | 0.090497881 | 0.005276573 | 0.024128201 |
| RNF220    | 1218.242801 | 0.240584346  | 0.088137995 | 0.004283144 | 0.020237711 |
| BRCA1     | 813.0104767 | 0.240461716  | 0.104336862 | 0.013963974 | 0.053321749 |
| DDX24     | 3932.2395   | -0.240351556 | 0.066905501 | 0.000227906 | 0.001642383 |
| GALK2     | 1075.505454 | -0.240309311 | 0.092061259 | 0.006126264 | 0.027296621 |
| RPS25P6   | 7614.694045 | -0.240253495 | 0.104284429 | 0.014235638 | 0.054084804 |
| OLMALINC  | 438.6541035 | 0.240238127  | 0.111663593 | 0.020724257 | 0.073017691 |
| SNRPEP2   | 613.8271462 | -0.240219076 | 0.110307802 | 0.01944072  | 0.069284823 |
| RPL13AP5  | 5084.164203 | -0.24020048  | 0.10038988  | 0.011244796 | 0.044805827 |
| FES       | 932.3299901 | -0.239968087 | 0.105589938 | 0.015426731 | 0.057586701 |
| TMEM39B   | 520.3091529 | 0.239933776  | 0.114393731 | 0.023581974 | 0.081009532 |
| AP2M1     | 6788.418553 | 0.239851374  | 0.071371869 | 0.000533316 | 0.003444773 |
| TAPBP     | 2132.216487 | 0.239616018  | 0.090710001 | 0.00557426  | 0.025216682 |
| TXNDC11   | 6699.228868 | -0.239531627 | 0.070850386 | 0.00050235  | 0.003277765 |
| CBX6      | 2256.050149 | -0.239415082 | 0.093034159 | 0.006848373 | 0.029938199 |
| RAB1A     | 4081.954701 | -0.239167333 | 0.09557255  | 0.008355574 | 0.035119774 |
| LSM10     | 502.1573771 | 0.238986681  | 0.11870248  | 0.028929269 | 0.095186805 |
| IRF4      | 11604.80567 | 0.238964383  | 0.062050055 | 8.17E-05    | 0.000664103 |
| GAGE13    | 2575.561726 | -0.23892952  | 0.076729115 | 0.001276077 | 0.007293012 |
| LPIN2     | 739.5302599 | -0.238651001 | 0.097193187 | 0.009582671 | 0.03936966  |
| TUBA1C    | 23069.73723 | 0.238554584  | 0.068541484 | 0.000345195 | 0.002355294 |
| GOLGA7    | 1523.49038  | -0.238461774 | 0.086324123 | 0.003924626 | 0.018821035 |
| MAGEA3    | 2192.951723 | -0.238287072 | 0.075442993 | 0.001098876 | 0.006448401 |
| DOK1      | 406.6913508 | 0.23821371   | 0.119404749 | 0.030170224 | 0.098101861 |
| DENND10P1 | 512.4352527 | 0.238176676  | 0.10869369  | 0.01884609  | 0.067569783 |
| SSR4      | 11673.75035 | -0.238053967 | 0.09669046  | 0.009373475 | 0.038629336 |
| CHTOP     | 2868.591372 | -0.238033878 | 0.081199916 | 0.002328497 | 0.012207866 |
| NT5C2     | 2048.859815 | 0.238011423  | 0.078896133 | 0.001750491 | 0.009596067 |
| TLR6      | 3.671020237 | 0.23800272   | 0.441159124 | 0.022738029 | 0.078798169 |
| PIN1      | 1485.339538 | 0.237996778  | 0.118693302 | 0.029526788 | 0.096583943 |
| TPM3      | 23546.42201 | -0.237964676 | 0.064322438 | 0.000151392 | 0.001143831 |
| SLC25A22  | 531.9849223 | -0.237786505 | 0.117171232 | 0.028169939 | 0.093117277 |
| UBL7      | 1106.474584 | 0.237584302  | 0.108915331 | 0.019418988 | 0.069235868 |
| MAFK      | 478.1272979 | -0.237560467 | 0.118877146 | 0.030259527 | 0.098276411 |
| LAX1      | 560.1639379 | 0.237515149  | 0.112354883 | 0.022783098 | 0.078900348 |
| NDUFA10   | 4594.601354 | -0.237470098 | 0.069292132 | 0.000429729 | 0.002859959 |
| RNF123    | 662.7912942 | -0.237181366 | 0.108063855 | 0.018942591 | 0.067816592 |
| ANKFY1    | 901.8722665 | 0.237080482  | 0.093811757 | 0.007900798 | 0.033558529 |

|          |             |              |             |             |             |
|----------|-------------|--------------|-------------|-------------|-------------|
| LSG1     | 1039.692602 | 0.236972568  | 0.094308051 | 0.008111468 | 0.034327049 |
| ZNF35    | 487.6297376 | -0.236896754 | 0.107559748 | 0.018569019 | 0.066810659 |
| RWDD1    | 2193.036501 | -0.236819682 | 0.075875088 | 0.001253236 | 0.007179056 |
| FIP1L1   | 1638.14601  | 0.236785885  | 0.076769798 | 0.001410443 | 0.00796683  |
| DENND5B  | 1264.708204 | 0.236534392  | 0.096339164 | 0.009509207 | 0.039142129 |
| OLAH     | 3.86743869  | 0.236424169  | 0.447443284 | 0.013333166 | 0.051457643 |
| SNHG7    | 607.1906017 | 0.236387721  | 0.111227029 | 0.02238594  | 0.077889757 |
| PRDM4    | 620.6792427 | 0.236342908  | 0.100696877 | 0.012720319 | 0.049367494 |
| PWWP2A   | 808.0620511 | -0.236267518 | 0.100075237 | 0.012336169 | 0.048189813 |
| FADD     | 801.2134029 | 0.236192408  | 0.109911981 | 0.021130716 | 0.074208194 |
| TXLNG    | 2069.909906 | -0.235996408 | 0.07645315  | 0.001411551 | 0.007969948 |
| PARL     | 1693.859405 | 0.235381391  | 0.074405164 | 0.001082802 | 0.006360545 |
| H3C14    | 101.9752733 | 0.235335459  | 0.467375059 | 6.19E-05    | 0.000521488 |
| LYN      | 2431.636552 | -0.235323198 | 0.080855941 | 0.002493502 | 0.012932007 |
| MAPRE1   | 9821.165435 | -0.235295069 | 0.0672924   | 0.000331485 | 0.002277004 |
| PHKA2    | 580.1431319 | 0.235223847  | 0.106460292 | 0.018282438 | 0.065964425 |
| PPP3CC   | 1064.953442 | -0.235196579 | 0.08882542  | 0.005576553 | 0.025219068 |
| ADCY7    | 827.8154193 | 0.235181693  | 0.092488395 | 0.007525716 | 0.032290527 |
| SERBP1P6 | 506.784175  | -0.235173826 | 0.111911034 | 0.023855185 | 0.081730313 |
| JSRP1    | 3464.506527 | -0.235147721 | 0.09200907  | 0.007299116 | 0.031536625 |
| H3C15    | 101.8174358 | 0.235121891  | 0.467282568 | 5.17E-05    | 0.000442818 |
| TMCC3    | 685.1575751 | 0.234983787  | 0.097738897 | 0.010993712 | 0.04399209  |
| KIR2DL4  | 4.469882141 | 0.234937813  | 0.436610361 | 0.023137239 | 0.079765582 |
| MECP2    | 1078.507267 | 0.234765846  | 0.09948764  | 0.012702037 | 0.049318649 |
| MRPS23   | 2474.563132 | -0.234618817 | 0.069930648 | 0.000559499 | 0.003599128 |
| DLG1     | 2006.426696 | 0.234612712  | 0.085104359 | 0.004015847 | 0.019162972 |
| ERVK3-1  | 403.849251  | 0.234573293  | 0.11440328  | 0.026852099 | 0.089776967 |
| MYD88    | 1104.430225 | 0.234572853  | 0.092940493 | 0.00794316  | 0.033721916 |
| PITPNC1  | 2054.278991 | 0.234525588  | 0.073927889 | 0.001054567 | 0.00621789  |
| RNF103   | 1245.479688 | -0.234429913 | 0.086702238 | 0.004706598 | 0.02195694  |
| RMND5B   | 905.1763988 | 0.23426513   | 0.0965788   | 0.010396704 | 0.042124407 |
| SS18     | 2054.509547 | 0.234261085  | 0.10136301  | 0.013816382 | 0.052886449 |
| LRCH3    | 470.6324421 | 0.234246237  | 0.113830723 | 0.026359245 | 0.088478977 |
| CARS1    | 2265.890259 | 0.234099035  | 0.078840234 | 0.002045947 | 0.010928333 |
| AMFR     | 1094.047996 | -0.233968009 | 0.101555503 | 0.01451936  | 0.054921746 |
| BRPF1    | 554.4848743 | -0.233958315 | 0.113710459 | 0.026617463 | 0.089172878 |
| RANBP6   | 1024.878399 | -0.23393794  | 0.098968211 | 0.012356138 | 0.048235176 |
| TOE1     | 748.3896099 | 0.233887314  | 0.093584738 | 0.008538206 | 0.035722667 |
| MOB1A    | 7618.166088 | 0.233776676  | 0.101152447 | 0.014104332 | 0.053668361 |
| HYOU1    | 18226.73926 | -0.23329265  | 0.070787491 | 0.000701872 | 0.004384675 |
| RPL37A   | 65257.24579 | -0.233163988 | 0.084355775 | 0.00396507  | 0.018952006 |
| HLA-C    | 42107.42371 | 0.233161733  | 0.078767294 | 0.002070637 | 0.011039782 |
| EIF3C    | 6466.613501 | -0.233055411 | 0.062422616 | 0.000134497 | 0.001029659 |
| FLOT2    | 2841.690164 | 0.232906172  | 0.084816106 | 0.004182198 | 0.019863718 |
| UBA6     | 882.8663041 | -0.232755476 | 0.108290395 | 0.021426153 | 0.07509344  |
| EHMT2    | 799.1918441 | 0.232609816  | 0.110454469 | 0.02374551  | 0.081442066 |
| RPS26P8  | 1014.539992 | -0.232408597 | 0.08920461  | 0.006376893 | 0.028206407 |
| SNX11    | 977.041751  | 0.232386822  | 0.097146526 | 0.011505414 | 0.045634278 |
| RPS3     | 71190.88754 | -0.232380236 | 0.070990113 | 0.000754244 | 0.004673073 |
| ASF1B    | 2075.65705  | 0.232256177  | 0.092722903 | 0.00844934  | 0.035427898 |

|              |             |              |             |             |             |
|--------------|-------------|--------------|-------------|-------------|-------------|
| AKAP8        | 1096.891898 | -0.232157827 | 0.087673706 | 0.005658096 | 0.025535104 |
| UBXN1        | 1146.371997 | 0.232012359  | 0.093942564 | 0.009293226 | 0.038344245 |
| B4GALT5      | 957.5602079 | 0.232007791  | 0.087241103 | 0.005423557 | 0.024676756 |
| PEX26        | 454.1408623 | 0.231987118  | 0.113877211 | 0.027992575 | 0.092739128 |
| ANO6         | 1239.38939  | 0.231954123  | 0.113565183 | 0.027603517 | 0.091678195 |
| GCLC         | 1195.74742  | 0.231915212  | 0.099177934 | 0.013134552 | 0.050804343 |
| ASH1L        | 1092.093705 | -0.231719546 | 0.096190151 | 0.011027392 | 0.044081569 |
| LMO4         | 1655.954376 | -0.231669222 | 0.094769435 | 0.010069548 | 0.04101961  |
| SMARCA4      | 2671.545006 | -0.231546542 | 0.099131555 | 0.013455265 | 0.051813507 |
| RAB8A        | 2751.159538 | 0.231519466  | 0.073604467 | 0.001161933 | 0.006756614 |
| ELK1         | 1811.261924 | 0.23151427   | 0.088278277 | 0.006054235 | 0.027013962 |
| CIB1         | 1937.434551 | -0.231445688 | 0.100306012 | 0.014525265 | 0.054932084 |
| SPECC1       | 518.6455094 | 0.231445371  | 0.105200959 | 0.01892537  | 0.067768949 |
| ATP5MF-PTCD1 | 1984.543843 | -0.231436206 | 0.113597758 | 0.030225798 | 0.098221082 |
| PPP1CA       | 4269.520406 | 0.231407359  | 0.09196541  | 0.008206843 | 0.034603825 |
| SNHG29       | 34069.96789 | -0.231334119 | 0.065960716 | 0.000339501 | 0.00232377  |
| AGTPBP1      | 1074.81694  | -0.23132345  | 0.097201502 | 0.012038608 | 0.047155073 |
| NOP58        | 5682.847222 | -0.231297906 | 0.066813738 | 0.000382914 | 0.002585157 |
| EIF4ENIF1    | 672.1741912 | -0.231258292 | 0.09911506  | 0.013533554 | 0.052056989 |
| PPP2R5A      | 938.8163755 | 0.231230523  | 0.094139051 | 0.009653909 | 0.039643524 |
| GOLM2        | 2635.497377 | 0.231180473  | 0.113563751 | 0.027898978 | 0.092469612 |
| TMEM117      | 484.6465463 | -0.231178373 | 0.111481157 | 0.025890016 | 0.087191249 |
| KLHL6        | 2412.418488 | 0.231048167  | 0.086889739 | 0.00543696  | 0.02471177  |
| NDUFB4       | 2790.192327 | 0.231041113  | 0.077968757 | 0.002138144 | 0.011361228 |
| FANCG        | 620.6996493 | 0.23066354   | 0.102343355 | 0.016591217 | 0.0609095   |
| DHX29        | 968.261107  | -0.23058084  | 0.100064368 | 0.014603055 | 0.055190116 |
| ASF1A        | 1388.43034  | -0.230408132 | 0.099363513 | 0.014097068 | 0.053658504 |
| INIP         | 1368.565969 | 0.230257749  | 0.091929527 | 0.008489746 | 0.035571483 |
| RPL27AP6     | 6113.683795 | -0.230234248 | 0.062620754 | 0.00017404  | 0.001293498 |
| RAVER1       | 2542.492925 | 0.230096273  | 0.093660108 | 0.00967453  | 0.039709373 |
| HCCS         | 831.2497533 | 0.230077078  | 0.092883247 | 0.009172195 | 0.037899473 |
| RBM26        | 1942.730655 | -0.230052248 | 0.100406189 | 0.01515259  | 0.056746841 |
| MAP3K11      | 613.8765955 | 0.230028856  | 0.103261422 | 0.017750221 | 0.06450799  |
| RPL7AP66     | 1833.657948 | 0.229939878  | 0.083130249 | 0.003979673 | 0.019016554 |
| FANCF        | 563.5675275 | 0.229421442  | 0.111850984 | 0.027274869 | 0.090760742 |
| MRPL45       | 2507.960454 | -0.229295685 | 0.076538121 | 0.001944211 | 0.010485175 |
| DOCK11       | 1871.380392 | 0.229282042  | 0.081833024 | 0.003564412 | 0.017416737 |
| TRIM25       | 2421.341785 | 0.229259694  | 0.073797903 | 0.001302358 | 0.007421172 |
| STK35        | 941.1624226 | 0.229228833  | 0.091160656 | 0.008304543 | 0.034939207 |
| SMYD2        | 431.5354409 | 0.229147568  | 0.108847999 | 0.023818167 | 0.081658918 |
| ANAPC13      | 1207.473564 | -0.229136237 | 0.086802869 | 0.005738389 | 0.025797424 |
| TRNT1        | 760.2816685 | -0.228953178 | 0.102898358 | 0.018001788 | 0.065230584 |
| CIAPIN1      | 2181.087498 | -0.228749999 | 0.081219737 | 0.003447851 | 0.0169428   |
| NOTCH2       | 1427.240334 | 0.228699844  | 0.084867569 | 0.004984424 | 0.023017406 |
| TUBG1        | 1768.823241 | 0.228637381  | 0.081112373 | 0.003395682 | 0.01673393  |
| NKAIN2       | 3.122855853 | 0.228564691  | 0.439471257 | 0.007706471 | 0.032951349 |
| KATNB1       | 694.5176908 | -0.228479201 | 0.113438594 | 0.030254462 | 0.098276411 |
| ARFGEF1      | 1248.6832   | -0.22840422  | 0.085755421 | 0.005460109 | 0.024790958 |
| TMOD3        | 1406.445838 | 0.2283677    | 0.112631842 | 0.028941872 | 0.095210182 |
| PARM1        | 2959.152826 | -0.228324035 | 0.068570762 | 0.000623752 | 0.0039595   |



|           |             |              |             |             |             |
|-----------|-------------|--------------|-------------|-------------|-------------|
| RNU5E-1   | 6.291715684 | 0.228147061  | 0.433253536 | 0.016125899 | 0.059618315 |
| TUT4      | 872.8899836 | 0.227995391  | 0.101941119 | 0.017673496 | 0.064256128 |
| ZWINT     | 1961.266603 | 0.227968318  | 0.073465268 | 0.001364664 | 0.00773548  |
| CYB561A3  | 1201.875292 | 0.227756786  | 0.10502576  | 0.020760054 | 0.073128938 |
| CPT1A     | 620.0670952 | -0.227736298 | 0.097212063 | 0.013388191 | 0.051625704 |
| TRPV2     | 1291.167882 | -0.2276945   | 0.108963501 | 0.025336276 | 0.08577679  |
| UBR7      | 1958.342239 | 0.227564486  | 0.073763664 | 0.001450251 | 0.008161394 |
| ITPR1     | 779.2983217 | 0.227551185  | 0.098812239 | 0.014906853 | 0.056020393 |
| MED16     | 1023.248041 | 0.227524528  | 0.108593936 | 0.024791208 | 0.084331427 |
| ATXN1L    | 1408.74402  | -0.227499347 | 0.089175583 | 0.007340113 | 0.031658464 |
| WDCP      | 898.9362451 | 0.227305316  | 0.087286888 | 0.006470668 | 0.028548422 |
| TMEM106C  | 4570.495743 | 0.227295611  | 0.067137481 | 0.000502671 | 0.003278625 |
| DNPEP     | 2413.26675  | 0.227188153  | 0.083270504 | 0.004499028 | 0.021079455 |
| DECR1     | 1521.40716  | -0.227146111 | 0.078955099 | 0.002865917 | 0.014536934 |
| TUBB      | 32909.35106 | 0.22712492   | 0.064179885 | 0.000287719 | 0.002008231 |
| KIF2C     | 1288.904866 | 0.226935457  | 0.084090853 | 0.004903908 | 0.022714584 |
| EVI2A     | 1503.45664  | 0.226821437  | 0.089895631 | 0.008150274 | 0.034445092 |
| NOTCH2NLC | 1594.478928 | 0.226802785  | 0.089278394 | 0.007756213 | 0.033114977 |
| TMEM147   | 3865.306968 | -0.226600292 | 0.105274536 | 0.021804097 | 0.076156019 |
| BRCC3     | 654.176217  | 0.226556128  | 0.110172282 | 0.02720109  | 0.090569059 |
| DSTYK     | 661.0370405 | 0.226510494  | 0.099456532 | 0.015807188 | 0.058703211 |
| YIPF2     | 1015.382664 | -0.226373678 | 0.104504485 | 0.021106735 | 0.0741691   |
| HP1BP3    | 3789.918042 | 0.22635447   | 0.069698622 | 0.000832879 | 0.005083882 |
| FRYL      | 1878.807402 | -0.226302188 | 0.089091596 | 0.007713334 | 0.03297255  |
| RPSAP45   | 1612.883838 | -0.226273988 | 0.092739965 | 0.010335754 | 0.041936329 |
| SPSB1     | 432.5041769 | 0.226160636  | 0.112894135 | 0.03068182  | 0.099404505 |
| RBFA      | 764.2693835 | -0.226055881 | 0.092133816 | 0.009980625 | 0.040714836 |
| MRPL33    | 1613.219369 | -0.226033378 | 0.090758006 | 0.009091542 | 0.037637638 |
| IL18R1    | 3.608689844 | 0.2259772    | 0.432497948 | 0.016473724 | 0.060582898 |
| DYNLRB1   | 1598.780941 | 0.225967247  | 0.081167409 | 0.003804804 | 0.018302162 |
| REERG     | 3.002003392 | 0.225902738  | 0.441929039 | 0.001431639 | 0.008070212 |
| RC3H2     | 861.973196  | 0.225645291  | 0.111351188 | 0.029300753 | 0.096052592 |
| RHBDD2    | 939.7214773 | 0.22556511   | 0.106689854 | 0.023824607 | 0.081664829 |
| LBR       | 3196.843526 | 0.225518748  | 0.111206552 | 0.029184517 | 0.095790045 |
| PFN1      | 19032.09182 | 0.225436997  | 0.086915759 | 0.006680377 | 0.029309372 |
| LITAF     | 5546.447538 | -0.225420271 | 0.072007442 | 0.001253807 | 0.007179952 |
| VPS36     | 2012.257805 | -0.22525756  | 0.094891506 | 0.012393617 | 0.04835968  |
| TXNDC15   | 870.7773855 | -0.22510612  | 0.088522743 | 0.007803575 | 0.033284361 |
| SUGT1     | 1555.135124 | -0.225034452 | 0.098102067 | 0.015327457 | 0.057265494 |
| E2F2      | 2740.716646 | 0.224962744  | 0.080491313 | 0.003672299 | 0.017798264 |
| RACK1     | 62344.28657 | -0.224954999 | 0.071532827 | 0.001203849 | 0.006958293 |
| HIF1A     | 1174.234716 | 0.224884903  | 0.111625219 | 0.030185875 | 0.098128176 |
| PAPOLA    | 6094.488049 | 0.224862405  | 0.084138361 | 0.005219567 | 0.023924628 |
| MCUR1     | 1565.225702 | 0.224594093  | 0.08850875  | 0.007873548 | 0.033491723 |
| UCK2      | 6145.48848  | -0.224498296 | 0.068596081 | 0.000778981 | 0.004805707 |
| TSPAN3    | 2594.337041 | -0.224443321 | 0.070879004 | 0.001116623 | 0.006539248 |
| TIMM10B   | 1377.473525 | -0.224186311 | 0.091130313 | 0.009907606 | 0.040493276 |
| ANAPC1P4  | 451.4303473 | 0.22393219   | 0.10833174  | 0.026857725 | 0.089776967 |
| TRAK1     | 868.7607541 | -0.223539366 | 0.111269714 | 0.030885865 | 0.099860067 |
| H3C8      | 71.33796237 | 0.223533679  | 0.434301859 | 0.008505104 | 0.035618594 |

|              |             |              |             |             |             |
|--------------|-------------|--------------|-------------|-------------|-------------|
| BLOC1S2      | 1449.735873 | -0.223494024 | 0.087653681 | 0.007676778 | 0.032852743 |
| EIF3CL       | 6187.002757 | -0.22348534  | 0.063638965 | 0.000325433 | 0.002239876 |
| MAGEA1       | 2581.849815 | -0.223453884 | 0.077657055 | 0.002899012 | 0.014670424 |
| ANXA6        | 12958.18419 | 0.223451314  | 0.065565602 | 0.000471381 | 0.003097875 |
| HSD17B11     | 643.1680481 | -0.223443487 | 0.106609734 | 0.025196247 | 0.085369481 |
| ST7          | 761.9700221 | -0.223361377 | 0.101936913 | 0.020099567 | 0.071199009 |
| NFIL3        | 787.4218518 | 0.223313287  | 0.094357071 | 0.012658738 | 0.049205692 |
| H3-3A        | 3114.225508 | 0.223116332  | 0.093225137 | 0.011780753 | 0.046365294 |
| MAD2L1BP     | 894.9654238 | -0.223115104 | 0.107724033 | 0.026867532 | 0.089784841 |
| RAB5IF       | 2183.100207 | -0.223055112 | 0.095635826 | 0.013976579 | 0.053327588 |
| ETF1         | 7942.028085 | -0.223010194 | 0.071332225 | 0.001287167 | 0.007344274 |
| FKBP1C       | 740.8478103 | -0.222998358 | 0.09795547  | 0.016210931 | 0.059849327 |
| TBRG4        | 2181.717746 | -0.222889715 | 0.094145605 | 0.012761232 | 0.049504089 |
| NDUFS5       | 4629.004888 | -0.222709221 | 0.078168773 | 0.003188909 | 0.015918804 |
| UQC2         | 1057.415722 | 0.222572836  | 0.09081703  | 0.010136843 | 0.041245234 |
| SLC7A6OS     | 655.0162791 | -0.222500548 | 0.099544993 | 0.017957089 | 0.065095858 |
| CRCP         | 936.5626126 | 0.222453024  | 0.087878399 | 0.008071906 | 0.034184688 |
| MAGEA6       | 3024.270881 | -0.222224811 | 0.071325019 | 0.001336422 | 0.0075903   |
| TMEM9B       | 1271.220263 | 0.222159106  | 0.085861516 | 0.006898127 | 0.030104554 |
| COX15        | 1586.878707 | -0.221942068 | 0.078021355 | 0.003221252 | 0.016038649 |
| CTNNB1       | 4036.691529 | -0.221940701 | 0.073444338 | 0.001826461 | 0.009939922 |
| MGA          | 1171.235078 | 0.221634785  | 0.098551604 | 0.017167162 | 0.06275781  |
| GIN52        | 2057.840563 | -0.221546363 | 0.079263896 | 0.003755237 | 0.018109003 |
| MRPL9        | 3941.31887  | -0.221519119 | 0.06811642  | 0.000840318 | 0.00511666  |
| SCAMP5       | 813.7210353 | 0.221496074  | 0.109073978 | 0.02949049  | 0.096501665 |
| MRPL44       | 2807.391973 | -0.221376653 | 0.068806136 | 0.000945306 | 0.005670196 |
| SMIM19       | 652.4251765 | -0.221341974 | 0.097382019 | 0.016386329 | 0.060323566 |
| DCAF15       | 763.2189635 | 0.221255965  | 0.101497591 | 0.020502915 | 0.072311399 |
| CLNS1A       | 3611.27229  | -0.221232873 | 0.069132741 | 0.001001564 | 0.005954028 |
| BRK1         | 2715.246397 | -0.221232306 | 0.071815592 | 0.001508606 | 0.008443611 |
| ARPC5L       | 1859.482143 | 0.221231382  | 0.095163678 | 0.014250499 | 0.05412939  |
| RPL4         | 89090.28676 | -0.221186178 | 0.065010875 | 0.000525509 | 0.003407051 |
| TRA2A        | 3011.239667 | -0.221156077 | 0.104053139 | 0.02366149  | 0.081218241 |
| POLR2B       | 6061.355607 | 0.221138891  | 0.067454022 | 0.000758057 | 0.004695022 |
| CDK1         | 3105.964545 | 0.221058338  | 0.104685121 | 0.024263013 | 0.082855965 |
| NFS1         | 953.5895864 | -0.221020382 | 0.089257313 | 0.009519496 | 0.039165863 |
| INPPL1       | 852.9798487 | 0.220866139  | 0.098667368 | 0.01783198  | 0.064750767 |
| LIN52        | 732.3331062 | -0.22076905  | 0.092957379 | 0.012562466 | 0.048930326 |
| TRMT10C      | 2016.749146 | -0.220579447 | 0.085193781 | 0.006893977 | 0.030101615 |
| TRABD        | 1499.902148 | 0.220521581  | 0.107325717 | 0.02790603  | 0.092470095 |
| CISD2        | 1585.648405 | -0.220512695 | 0.10294724  | 0.022758849 | 0.078838764 |
| DCAF7        | 5533.195922 | 0.220324438  | 0.067275601 | 0.000771054 | 0.004760191 |
| COA6         | 546.1293238 | -0.220317487 | 0.109042504 | 0.030361289 | 0.098555008 |
| LOC105374369 | 3.858849021 | -0.22023452  | 0.420633634 | 0.025938029 | 0.087318981 |
| GDE1         | 1654.907612 | -0.220082638 | 0.078372493 | 0.003624596 | 0.017641126 |
| FAM91A1      | 2131.069729 | -0.219975402 | 0.103370403 | 0.023596464 | 0.081027158 |
| STMN1        | 10580.45405 | 0.219972863  | 0.065140903 | 0.000533089 | 0.003444591 |
| RABL3        | 1418.70931  | 0.219804637  | 0.089373533 | 0.009947782 | 0.04059042  |
| TMEM41A      | 2171.665624 | -0.219738352 | 0.085403097 | 0.007307553 | 0.031541597 |
| TMEM50A      | 4263.376879 | 0.219645149  | 0.082691928 | 0.005659394 | 0.025535104 |

|         |             |              |             |             |             |
|---------|-------------|--------------|-------------|-------------|-------------|
| ZCRB1   | 1911.309818 | 0.219400682  | 0.082101272 | 0.005431021 | 0.024697741 |
| ZBED4   | 1324.472784 | 0.219390363  | 0.082328774 | 0.005560824 | 0.025182216 |
| RHNO1   | 811.3898332 | 0.219368813  | 0.092407528 | 0.012592471 | 0.048992096 |
| CLTC    | 18221.27719 | -0.219326257 | 0.069077171 | 0.001104135 | 0.006474877 |
| SENP5   | 1081.540984 | 0.219319025  | 0.085904708 | 0.007677719 | 0.032852743 |
| WDFY1   | 1417.284092 | -0.219239027 | 0.094611234 | 0.014674655 | 0.055424426 |
| ATG4B   | 1876.585687 | 0.219091045  | 0.101909012 | 0.021854456 | 0.076301133 |
| CCNF    | 1060.775511 | 0.219090828  | 0.104017704 | 0.024833945 | 0.084439314 |
| ATP2A3  | 4829.407175 | 0.219022416  | 0.102333142 | 0.022853282 | 0.079081458 |
| ASB1    | 1057.44741  | 0.219011239  | 0.086839177 | 0.008410026 | 0.035297243 |
| MORC2   | 727.3578592 | 0.218777005  | 0.108415418 | 0.030662898 | 0.099361791 |
| SEC63   | 3166.89935  | -0.218764952 | 0.082565139 | 0.005830662 | 0.026144375 |
| H1-4    | 164.0977435 | 0.218618745  | 0.440484526 | 0.000271598 | 0.001909568 |
| SRF     | 875.9163615 | 0.21856584   | 0.104525552 | 0.025669369 | 0.086586428 |
| PPP1R11 | 908.8213402 | 0.218552135  | 0.090925527 | 0.011623486 | 0.045902829 |
| RPL5    | 59771.58512 | -0.218485039 | 0.066070982 | 0.000706401 | 0.00440661  |
| RAD18   | 856.2756162 | -0.21845949  | 0.106084951 | 0.028033363 | 0.092803241 |
| SCN4B   | 3.29871326  | 0.218430206  | 0.422122596 | 0.02009814  | 0.071199009 |
| BAP1    | 1204.632829 | -0.218421188 | 0.098300213 | 0.018858495 | 0.067591773 |
| CACNG6  | 1441.301512 | 0.2184079    | 0.100466889 | 0.021123427 | 0.074197644 |
| SYNE3   | 1014.402978 | 0.218283098  | 0.09256168  | 0.013125226 | 0.050779611 |
| SLC39A6 | 4207.948451 | -0.218282869 | 0.082460462 | 0.005925776 | 0.026502238 |
| GSK3A   | 1379.759805 | 0.218221585  | 0.104232964 | 0.025697592 | 0.086627447 |
| RNH1    | 2082.732558 | 0.218153563  | 0.099098016 | 0.019648339 | 0.069895294 |
| ABCF2   | 2239.880208 | -0.218082041 | 0.075920875 | 0.002981039 | 0.014989154 |
| PRPSAP1 | 701.6041707 | 0.218027497  | 0.099137504 | 0.019794505 | 0.070314143 |
| ELL2    | 7542.388245 | -0.217948637 | 0.105547188 | 0.026258671 | 0.088175568 |
| BICD2   | 546.5499532 | 0.217928564  | 0.104379816 | 0.026011743 | 0.087533105 |
| VRK3    | 1212.07365  | 0.217890033  | 0.088281454 | 0.009797969 | 0.040139916 |
| INO80E  | 594.631501  | -0.217864732 | 0.101483938 | 0.022785739 | 0.078900348 |
| TLN1    | 2727.957332 | 0.217775139  | 0.082190449 | 0.005815321 | 0.026082339 |
| GBA2    | 544.205974  | 0.217722447  | 0.104657685 | 0.026613483 | 0.089172878 |
| DCAF4   | 797.7759245 | 0.217630692  | 0.095273219 | 0.016036849 | 0.059390529 |
| QRICH1  | 1851.850217 | -0.217490532 | 0.075536368 | 0.002921922 | 0.014747302 |
| NDUFC1  | 967.4786534 | -0.217370533 | 0.09960324  | 0.020917435 | 0.073608457 |
| ARPC1B  | 4120.263496 | 0.217273341  | 0.090101974 | 0.011453879 | 0.045466513 |
| TYW1    | 1091.623382 | -0.217184774 | 0.085376847 | 0.007831885 | 0.033388662 |
| SLMAP   | 1272.691946 | -0.217019587 | 0.098569839 | 0.019850433 | 0.07048606  |
| RBM15   | 768.9591514 | -0.216874028 | 0.090050069 | 0.011617464 | 0.045892799 |
| RALBP1  | 1263.362115 | 0.216812779  | 0.082915682 | 0.006473637 | 0.028553497 |
| RPL22P1 | 9025.192931 | -0.216796587 | 0.074890391 | 0.002793457 | 0.014231922 |
| TINF2   | 1223.563108 | 0.216674878  | 0.082322085 | 0.006105976 | 0.027216778 |
| USP10   | 2850.503922 | -0.216480811 | 0.068816949 | 0.001229437 | 0.007068449 |
| RPL23   | 44454.30283 | -0.216386362 | 0.060428856 | 0.000201926 | 0.001474176 |
| INPP5K  | 1076.398406 | 0.216314964  | 0.099133166 | 0.02122809  | 0.074519935 |
| DNAJC15 | 835.4724152 | -0.21599564  | 0.097510717 | 0.019331214 | 0.068998897 |
| ECE1    | 1492.580615 | 0.215989945  | 0.091945732 | 0.013579201 | 0.052186203 |
| ARMC10  | 1231.460436 | -0.215968739 | 0.089628567 | 0.011656428 | 0.046011936 |
| MRPS31  | 831.6346083 | -0.215950669 | 0.092586577 | 0.0142603   | 0.054154738 |
| SNX12   | 1018.3836   | 0.215859815  | 0.09100363  | 0.01281034  | 0.049661216 |

|              |             |              |             |             |             |
|--------------|-------------|--------------|-------------|-------------|-------------|
| EFCAB14      | 2140.714555 | 0.215833025  | 0.078345332 | 0.004292593 | 0.020271292 |
| KNTC1        | 792.7885505 | 0.215781361  | 0.099803406 | 0.02177148  | 0.076088139 |
| GAGE12J      | 2516.740177 | -0.21567955  | 0.076919265 | 0.003724441 | 0.017990555 |
| EIF2B5       | 1875.654384 | 0.215598622  | 0.083621361 | 0.0072431   | 0.031357193 |
| TMEM59       | 4431.146891 | 0.215570259  | 0.079290614 | 0.004791964 | 0.022283147 |
| RPS26P6      | 916.4719013 | -0.215436972 | 0.09075013  | 0.012822015 | 0.049684233 |
| H3P6         | 2961.903058 | 0.215031073  | 0.097380816 | 0.019678345 | 0.069973285 |
| CDC25B       | 3897.373797 | 0.214993171  | 0.08678209  | 0.009597152 | 0.039419802 |
| KCMF1        | 3065.511674 | 0.214923258  | 0.068200705 | 0.001200754 | 0.006942725 |
| ERF          | 1188.897071 | -0.214835148 | 0.096126418 | 0.018462227 | 0.066481678 |
| TIMELESS     | 2220.72032  | 0.214806597  | 0.075526168 | 0.003268988 | 0.016211073 |
| SELENOT      | 3448.036536 | 0.214774537  | 0.101622558 | 0.024715924 | 0.084120607 |
| PEX19        | 3351.52952  | -0.214602255 | 0.07008318  | 0.001641687 | 0.009097311 |
| SIGMAR1      | 2924.740536 | -0.214470319 | 0.081744298 | 0.006403398 | 0.028287663 |
| EFHD2        | 1274.459699 | 0.214443775  | 0.105868896 | 0.030640116 | 0.09930655  |
| LRP10        | 2982.989606 | 0.214378749  | 0.097974675 | 0.020632102 | 0.0727374   |
| IGSF3        | 4.973362995 | 0.214290141  | 0.412266662 | 0.028869026 | 0.095024695 |
| UBXN7        | 1837.692394 | 0.214272868  | 0.089928436 | 0.012469404 | 0.048600648 |
| COX19        | 629.1214169 | 0.214268973  | 0.094955491 | 0.017368061 | 0.063371831 |
| CREB3L2      | 2986.252527 | -0.214229717 | 0.072244402 | 0.002245067 | 0.011842165 |
| CD81         | 3948.746341 | -0.213907725 | 0.093237669 | 0.015895819 | 0.058969128 |
| METTL17      | 1398.36918  | -0.213814546 | 0.085652669 | 0.00923455  | 0.038129402 |
| RPL23AP42    | 13698.12968 | -0.21373318  | 0.065210724 | 0.000784268 | 0.004833159 |
| MED10        | 2889.222896 | -0.21367011  | 0.068303224 | 0.001315892 | 0.007485971 |
| ZNF217       | 4825.539589 | 0.213478222  | 0.079934093 | 0.005550642 | 0.025142679 |
| BZW2         | 4850.139007 | -0.213379474 | 0.066626078 | 0.001022288 | 0.006054364 |
| GTPBP6       | 926.3675497 | 0.213184799  | 0.098929884 | 0.022528917 | 0.078273677 |
| NEMP1        | 4144.133223 | 0.213067122  | 0.067638137 | 0.001173538 | 0.006810374 |
| ZNF740       | 1000.866626 | 0.21293997   | 0.086922798 | 0.010454987 | 0.042296028 |
| PDP2         | 804.1060433 | -0.212932684 | 0.091807918 | 0.014894726 | 0.056011285 |
| PAK1         | 1373.209902 | 0.212925978  | 0.079075638 | 0.005217765 | 0.023924628 |
| UBR3         | 1766.62216  | -0.212406854 | 0.095877342 | 0.019464161 | 0.069339821 |
| HLA-B        | 56627.87577 | 0.212151481  | 0.083306581 | 0.008075207 | 0.034190306 |
| DAXX         | 840.712964  | 0.212122038  | 0.091525859 | 0.014919314 | 0.056046756 |
| GARS1        | 9584.849296 | -0.21210063  | 0.061616005 | 0.000431324 | 0.002869476 |
| RPL4P5       | 2836.022763 | -0.212050818 | 0.073318695 | 0.002873985 | 0.014565056 |
| ABI2         | 1928.292993 | 0.211995933  | 0.078828406 | 0.005282502 | 0.024142804 |
| MRPS24       | 1790.024182 | -0.211904726 | 0.089730564 | 0.013412769 | 0.051684227 |
| TRRAP        | 2411.297874 | 0.211893739  | 0.076775864 | 0.004209124 | 0.019952688 |
| PTPN6        | 4650.127487 | 0.211852521  | 0.067390789 | 0.001242154 | 0.007124201 |
| HLA-H        | 9005.846693 | 0.21174473   | 0.073136318 | 0.002814836 | 0.014332409 |
| NGRN         | 1753.124303 | 0.211494595  | 0.07823196  | 0.005076691 | 0.023378866 |
| HLA-A        | 40291.52495 | 0.211325566  | 0.0838411   | 0.008567077 | 0.035834799 |
| LOC124903128 | 2.989897106 | -0.211276427 | 0.422618544 | 0.002017995 | 0.010812384 |
| H2AC17       | 41.43457302 | 0.211163371  | 0.419486149 | 0.009357806 | 0.038583125 |
| ESYT2        | 4349.580731 | -0.211128739 | 0.068094219 | 0.001461649 | 0.008212648 |
| AP1M1        | 2036.541686 | 0.210789505  | 0.095283632 | 0.019672487 | 0.069966821 |
| COX6A1P2     | 2464.849853 | 0.210772237  | 0.093232328 | 0.017388985 | 0.063421451 |
| PRMT7        | 884.8279779 | -0.210537434 | 0.099709283 | 0.025441738 | 0.086047063 |
| MECR         | 1014.422684 | -0.210229575 | 0.101030479 | 0.027412595 | 0.091148984 |

|              |             |              |             |             |             |
|--------------|-------------|--------------|-------------|-------------|-------------|
| GPKOW        | 590.1700548 | 0.210168897  | 0.103340268 | 0.030362705 | 0.098555008 |
| SRPRA        | 7011.740104 | -0.210047618 | 0.063733434 | 0.000752806 | 0.004670847 |
| TRIB2        | 1513.570639 | -0.209990669 | 0.080039299 | 0.006499219 | 0.028636341 |
| MAD1L1       | 931.6235369 | -0.209754053 | 0.090861402 | 0.015511154 | 0.057814605 |
| APEX2        | 770.9058688 | 0.209738552  | 0.091487456 | 0.016065311 | 0.059450865 |
| HEXB         | 5154.112642 | -0.209659409 | 0.064509933 | 0.000871987 | 0.005279787 |
| REXO2        | 2961.558753 | -0.209614504 | 0.071038621 | 0.002384071 | 0.01244924  |
| DLGAP4       | 746.7482597 | 0.20957943   | 0.098720016 | 0.024392609 | 0.083183696 |
| PTK2B        | 2920.717337 | -0.209476187 | 0.080098383 | 0.006671025 | 0.029283177 |
| ASB8         | 1166.997088 | 0.209464612  | 0.081969751 | 0.007859532 | 0.033460066 |
| RAB11FIP1    | 1787.157624 | -0.209451892 | 0.074355543 | 0.003637289 | 0.01769182  |
| LINC01465    | 4.014183057 | 0.20935815   | 0.410422169 | 0.022637509 | 0.078559802 |
| WBP1L        | 974.2442646 | 0.209281683  | 0.091416001 | 0.016222695 | 0.05985351  |
| NRBF2        | 739.3650021 | -0.209247303 | 0.099840176 | 0.026469216 | 0.088762086 |
| GEN1         | 2836.909736 | 0.209203895  | 0.09518091  | 0.019987757 | 0.070884289 |
| ZNF572       | 3.048231341 | -0.209134393 | 0.420229936 | 0.001986879 | 0.010673959 |
| NBPF15       | 1072.798277 | 0.20906387   | 0.086248768 | 0.01134773  | 0.045129366 |
| SLC25A3      | 13477.43291 | -0.208914489 | 0.075709997 | 0.00435812  | 0.020528508 |
| ZC3H15       | 4524.551495 | -0.20882754  | 0.08036715  | 0.007004461 | 0.030484104 |
| ARPC5        | 2277.330632 | 0.208650212  | 0.092356015 | 0.017560967 | 0.063967874 |
| ISG20L2      | 3042.166249 | -0.20864429  | 0.079233736 | 0.006372544 | 0.02819752  |
| ITPRID2      | 1200.550008 | 0.208554644  | 0.099183782 | 0.026464744 | 0.088762086 |
| KBTBD4       | 797.442032  | 0.208440106  | 0.092316779 | 0.017647614 | 0.064188979 |
| CBX3         | 7883.764718 | -0.208352426 | 0.089999924 | 0.015112183 | 0.05663226  |
| SRD5A1       | 1031.598516 | 0.208311586  | 0.092523828 | 0.017918536 | 0.06500353  |
| AAAS         | 1503.196141 | 0.208260941  | 0.083512056 | 0.009386642 | 0.038674396 |
| RPS16        | 52225.51742 | -0.208058264 | 0.078588779 | 0.006095063 | 0.027175129 |
| URGCP-MRPS24 | 1815.43762  | -0.208001932 | 0.089144367 | 0.014617903 | 0.055234177 |
| AVL9         | 2473.713621 | -0.207993835 | 0.079879049 | 0.006910412 | 0.030150569 |
| ATP1A1       | 6554.077335 | -0.207929567 | 0.062596657 | 0.0006859   | 0.004297297 |
| RPS14        | 44455.26932 | -0.207895383 | 0.082279745 | 0.008197373 | 0.034572309 |
| ABCF2-H2BK1  | 1437.100427 | -0.20787898  | 0.080325165 | 0.007251206 | 0.031375135 |
| RPL6         | 41375.99304 | -0.207779312 | 0.062263834 | 0.000649981 | 0.004104928 |
| ZNF622       | 1832.127567 | -0.207755475 | 0.076797562 | 0.005140339 | 0.023636549 |
| SNORA79B     | 4.965437726 | 0.207732386  | 0.415767053 | 0.009665591 | 0.039682086 |
| YTHDF2       | 3565.760417 | -0.207722521 | 0.07757414  | 0.005565851 | 0.025188299 |
| ERP44        | 3872.772047 | -0.207644642 | 0.075024108 | 0.004256334 | 0.020133008 |
| CYBA         | 5858.99131  | -0.20760134  | 0.102178749 | 0.030834538 | 0.099768629 |
| MKRN2        | 1375.080766 | -0.207274397 | 0.085528088 | 0.011501126 | 0.045627719 |
| SRA1         | 995.1076456 | -0.207071101 | 0.100786065 | 0.029402715 | 0.096287218 |
| SNORD3D      | 134.5027834 | 0.206980965  | 0.419307337 | 0.00358883  | 0.017501482 |
| NFE2L1       | 6631.382846 | 0.206925693  | 0.070664847 | 0.002557565 | 0.013189206 |
| SNORD3B-1    | 135.1705468 | 0.206839322  | 0.419193536 | 0.003535862 | 0.017286993 |
| WIPF1        | 5804.322658 | 0.206638237  | 0.074622244 | 0.004202309 | 0.019937364 |
| SNORD3B-2    | 135.4977192 | 0.206628776  | 0.418967649 | 0.003517359 | 0.017215969 |
| SEC23B       | 4214.9016   | -0.206597228 | 0.066939252 | 0.001553405 | 0.008660756 |
| RCL1         | 925.1195606 | 0.206431272  | 0.089202313 | 0.015318316 | 0.057256204 |
| UBBP4        | 4012.956752 | 0.206359019  | 0.074695848 | 0.004313265 | 0.020341178 |
| RSRC1        | 941.2863459 | 0.20631499   | 0.10106135  | 0.030151414 | 0.098089805 |
| GORASP2      | 6627.572696 | -0.206283304 | 0.06265666  | 0.00074864  | 0.004646669 |

|          |             |              |             |             |             |
|----------|-------------|--------------|-------------|-------------|-------------|
| PIGO     | 1011.034177 | 0.206170991  | 0.097654627 | 0.025792501 | 0.086896642 |
| GPBP1L1  | 1189.496621 | 0.206040004  | 0.097135718 | 0.024949138 | 0.084702216 |
| SZRD1    | 3401.404005 | 0.206026947  | 0.069198459 | 0.002198681 | 0.011643593 |
| CAMSAP1  | 1255.810029 | 0.205999636  | 0.094647737 | 0.021801124 | 0.076156019 |
| SRPRB    | 7063.655902 | -0.205872616 | 0.066806751 | 0.001577444 | 0.00878065  |
| ETV5     | 987.3436963 | 0.2057463    | 0.088408732 | 0.0148552   | 0.055899067 |
| SNRPA1   | 2482.431865 | -0.205734199 | 0.073194361 | 0.00375854  | 0.018114843 |
| PIP4K2C  | 1430.882964 | 0.205551741  | 0.086700531 | 0.013224604 | 0.051084199 |
| ALAD     | 803.9144512 | 0.205272273  | 0.090987201 | 0.017878887 | 0.064907483 |
| TMEM18   | 2709.317734 | -0.205229665 | 0.084431505 | 0.011439766 | 0.045425917 |
| TAF1B    | 854.7512275 | 0.205139936  | 0.095748927 | 0.023773213 | 0.081520937 |
| TNPO2    | 894.5905979 | -0.20503214  | 0.097586779 | 0.026404687 | 0.088602183 |
| CERS5    | 876.4227417 | 0.204872246  | 0.088077337 | 0.015089894 | 0.056560972 |
| NR2C2    | 1263.812888 | 0.204637327  | 0.087034837 | 0.013972037 | 0.053327588 |
| KLF10    | 1007.573344 | -0.204601292 | 0.098405925 | 0.027896679 | 0.092469612 |
| MSN      | 26876.72863 | 0.204556218  | 0.059626472 | 0.000448928 | 0.002974018 |
| MEMO1    | 1127.268879 | -0.204543124 | 0.089101836 | 0.016340291 | 0.060209397 |
| SNORD3A  | 291.4167703 | 0.204462622  | 0.420846949 | 0.00063426  | 0.004017365 |
| ZBTB1    | 1342.255526 | -0.204147753 | 0.097069369 | 0.026406183 | 0.088602183 |
| POLR1D   | 2658.931329 | -0.203982065 | 0.077257827 | 0.006274123 | 0.027812723 |
| CHMP1B   | 1164.351259 | -0.203968076 | 0.09677887  | 0.0261138   | 0.087757166 |
| USP11    | 1046.528207 | 0.203960721  | 0.093498004 | 0.021715012 | 0.075921433 |
| CDK2     | 1952.344188 | 0.203956     | 0.078863109 | 0.007321192 | 0.031584722 |
| PDE3B    | 3.129593481 | -0.203844074 | 0.414410655 | 0.001970879 | 0.010605876 |
| PTGR3    | 955.1014954 | 0.203702984  | 0.094003281 | 0.02252497  | 0.078273677 |
| MMS19    | 1218.499221 | -0.203660733 | 0.093799091 | 0.022437168 | 0.078022381 |
| HMG20B   | 993.5960923 | 0.203600627  | 0.088640679 | 0.016192147 | 0.05981216  |
| SMIM7    | 1805.674208 | 0.203546362  | 0.079430911 | 0.007860227 | 0.033460066 |
| C3orf52  | 662.3906428 | 0.203523915  | 0.095133596 | 0.024050939 | 0.082261526 |
| PRG4     | 3.036141836 | 0.203409602  | 0.414369521 | 0.001735514 | 0.009534868 |
| INPP4A   | 1553.458285 | 0.203396551  | 0.075345927 | 0.005257655 | 0.024073722 |
| SCARNA16 | 4.559190129 | 0.203366717  | 0.413686068 | 0.004252734 | 0.020133008 |
| PPP2R5E  | 1253.09643  | 0.203341606  | 0.098756229 | 0.029222558 | 0.095878561 |
| CMTM6    | 3856.922243 | -0.203298773 | 0.096376902 | 0.026085933 | 0.087697555 |
| CDC34    | 1081.993514 | -0.203105541 | 0.097786249 | 0.028246587 | 0.093277296 |
| NECAP2   | 964.4225399 | 0.203065741  | 0.090497557 | 0.01860802  | 0.066886007 |
| UFD1     | 1699.774481 | 0.202995319  | 0.075898308 | 0.005679468 | 0.025588625 |
| EIF3B    | 11820.71204 | -0.202943191 | 0.072703162 | 0.004033481 | 0.019231052 |
| POLR2F   | 1267.862869 | -0.202699149 | 0.088030404 | 0.015837971 | 0.058779712 |
| RNF167   | 2077.143018 | 0.202686945  | 0.073810827 | 0.004590515 | 0.021461648 |
| PPIF     | 7501.518325 | -0.20265019  | 0.078368047 | 0.007432127 | 0.031983632 |
| G6PD     | 1112.694097 | 0.202619266  | 0.09400774  | 0.023230101 | 0.080001204 |
| HAUS1    | 1179.268583 | 0.202533534  | 0.085836427 | 0.013770466 | 0.05278069  |
| STK4     | 3477.391093 | 0.202511527  | 0.084098103 | 0.011961429 | 0.046944638 |
| SRRM1    | 1583.747075 | 0.202416943  | 0.08693554  | 0.014925698 | 0.05605472  |
| ADAR     | 10389.89234 | -0.202339863 | 0.062067727 | 0.000865901 | 0.005246606 |
| RPS10    | 16337.22798 | -0.202253618 | 0.094208806 | 0.023896107 | 0.081812749 |
| MGAT1    | 6841.073284 | 0.202238437  | 0.089858352 | 0.018200269 | 0.065784607 |
| CLDND1   | 2019.142786 | 0.202210815  | 0.096376559 | 0.02671414  | 0.089406984 |
| FOXRED1  | 1653.691624 | -0.202203877 | 0.089896653 | 0.018330844 | 0.06609103  |

|              |             |              |             |             |             |
|--------------|-------------|--------------|-------------|-------------|-------------|
| TFDP1        | 7847.473883 | -0.202072867 | 0.06752767  | 0.002211785 | 0.011687969 |
| BRD8         | 911.0458253 | 0.202030578  | 0.091840283 | 0.020895056 | 0.073559602 |
| RPL15P5      | 1758.806371 | -0.201703382 | 0.09431202  | 0.024382245 | 0.083164729 |
| BUB3         | 5309.814202 | 0.201486562  | 0.068584076 | 0.002520603 | 0.013056917 |
| ACTR1A       | 2006.61957  | 0.201365065  | 0.081142264 | 0.009841776 | 0.040287773 |
| TMEM230      | 3603.537238 | -0.201335219 | 0.076264192 | 0.006372186 | 0.02819752  |
| NUFIP2       | 4296.049523 | -0.20131865  | 0.097546987 | 0.029288981 | 0.0960419   |
| OPTN         | 1280.049498 | 0.201095448  | 0.082123714 | 0.010842416 | 0.043472591 |
| ATP5MF       | 4637.626272 | -0.201010089 | 0.076120783 | 0.006356785 | 0.028153567 |
| AMMECR1L     | 802.5082717 | 0.200939836  | 0.091829686 | 0.021510177 | 0.075299423 |
| NDUFB9       | 5707.343868 | -0.200840349 | 0.080358539 | 0.009515732 | 0.039159681 |
| PMF1-BGLAP   | 784.4730593 | -0.200721875 | 0.093941313 | 0.024565019 | 0.083689247 |
| LRRFIP1      | 3796.394    | 0.199922818  | 0.076029221 | 0.006515169 | 0.028693588 |
| DYNC1LI1     | 1495.443569 | -0.199828477 | 0.078780761 | 0.008578321 | 0.035873166 |
| B2M          | 109201.7765 | 0.199808039  | 0.082558238 | 0.012197222 | 0.047690062 |
| KIF3B        | 1150.104626 | 0.199403068  | 0.084413017 | 0.013779657 | 0.052792549 |
| CAPNS1       | 9768.786034 | 0.199394244  | 0.080566999 | 0.01015412  | 0.041296125 |
| MRRF         | 1040.778933 | -0.199220915 | 0.088361266 | 0.018447575 | 0.066442734 |
| STXBP2       | 1309.846598 | 0.199077349  | 0.093884152 | 0.025571035 | 0.086352107 |
| RPS10-NUDT3  | 15509.14917 | -0.199047102 | 0.090239081 | 0.020649248 | 0.072768218 |
| TCF3         | 5453.695326 | 0.199039966  | 0.094273739 | 0.025775869 | 0.086874412 |
| ME2          | 4682.848622 | -0.198906915 | 0.076394727 | 0.007107187 | 0.030869113 |
| GSE1         | 2467.695437 | -0.198848219 | 0.091920344 | 0.023142049 | 0.079765582 |
| STK39        | 1356.600508 | -0.198847449 | 0.092944212 | 0.024530176 | 0.083586985 |
| GOSR2        | 1360.398421 | 0.19882188   | 0.089263568 | 0.019627756 | 0.069836418 |
| IGBP1        | 1860.961768 | -0.198690258 | 0.088873128 | 0.019329989 | 0.068998897 |
| SNORD3C      | 165.9281431 | 0.198530432  | 0.41105068  | 0.002466545 | 0.01282418  |
| EXOC4        | 2498.22005  | -0.198515239 | 0.070570876 | 0.003801631 | 0.018297064 |
| TATDN2       | 1329.428151 | -0.198513736 | 0.083532355 | 0.01342387  | 0.051715496 |
| PSMD5        | 1438.930341 | 0.198499735  | 0.081216878 | 0.011155895 | 0.044502796 |
| CDV3         | 12222.47366 | -0.198499456 | 0.071245001 | 0.004132911 | 0.019645792 |
| CALCOCO1     | 1077.830792 | 0.198461327  | 0.096737059 | 0.030125965 | 0.098043852 |
| LOC105375124 | 3.092233291 | -0.198396954 | 0.402439954 | 0.011536167 | 0.045683009 |
| ARMC8        | 1035.998567 | 0.198385647  | 0.08550654  | 0.015453108 | 0.05765138  |
| RMND5A       | 3554.243692 | 0.197931608  | 0.083307444 | 0.013176582 | 0.050932782 |
| HLA-DRB1     | 7105.573951 | -0.197288418 | 0.076648923 | 0.00781886  | 0.033341344 |
| DDX28        | 1142.420755 | -0.197234657 | 0.09457788  | 0.028223048 | 0.093235124 |
| TMEM39A      | 1562.36724  | -0.197116238 | 0.081381071 | 0.011880946 | 0.046674759 |
| UFC1         | 5615.452191 | -0.19709308  | 0.065432445 | 0.002031172 | 0.010872892 |
| SRPK1        | 2777.163584 | -0.196924348 | 0.082004369 | 0.012576761 | 0.04895536  |
| WNK1         | 3007.518216 | -0.196691553 | 0.082863972 | 0.013496195 | 0.051936359 |
| RN7SL4P      | 617.088509  | 0.196595737  | 0.414855036 | 1.53E-05    | 0.000149093 |
| FAM98A       | 2627.523967 | -0.196567768 | 0.085497565 | 0.016516708 | 0.060687424 |
| PINK1-AS     | 876.6835759 | -0.196546157 | 0.087211599 | 0.018588002 | 0.066837299 |
| DCUN1D5      | 1996.944417 | -0.19648361  | 0.073674469 | 0.005984155 | 0.026742609 |
| NCBP2        | 2558.065285 | 0.196375307  | 0.075938276 | 0.007440172 | 0.0320103   |
| EIF2AK1      | 5697.508183 | -0.196369965 | 0.063211769 | 0.001484055 | 0.008325035 |
| NBR1         | 2766.860998 | 0.196283836  | 0.081042229 | 0.011783833 | 0.046366881 |
| GAGE12G      | 2717.061027 | -0.196059289 | 0.075653278 | 0.007430329 | 0.031983632 |
| RPA2         | 2379.285827 | 0.196030213  | 0.074700337 | 0.006694782 | 0.029357696 |

|                |             |              |             |             |             |
|----------------|-------------|--------------|-------------|-------------|-------------|
| GAGE12B        | 2734.109067 | -0.195924473 | 0.0756643   | 0.00747335  | 0.032125158 |
| GAGE12F        | 2734.109067 | -0.195924473 | 0.0756643   | 0.00747335  | 0.032125158 |
| RCSD1          | 7590.993836 | 0.195914267  | 0.064996277 | 0.001991677 | 0.010687903 |
| SNRPF          | 1812.266409 | -0.195896659 | 0.080280994 | 0.011372308 | 0.045189136 |
| MRPL22         | 1711.326023 | -0.195750459 | 0.082556019 | 0.01369807  | 0.052573023 |
| IVNS1ABP       | 913.3968598 | 0.195697747  | 0.088054073 | 0.020027863 | 0.070991137 |
| EPS15          | 1541.710122 | 0.195644439  | 0.087373653 | 0.019097557 | 0.06828668  |
| ADAM22         | 939.7737826 | -0.195362896 | 0.091415442 | 0.024950396 | 0.084702216 |
| RRP36          | 874.5912923 | 0.195317254  | 0.089648831 | 0.022508932 | 0.078254803 |
| COPS6          | 2507.18084  | -0.195295527 | 0.084659703 | 0.016306259 | 0.060118264 |
| SMARCD1        | 3722.213621 | 0.195208301  | 0.074061338 | 0.006499116 | 0.028636341 |
| ENO1           | 96453.02914 | 0.195161837  | 0.071409843 | 0.004832607 | 0.022448031 |
| SGK1           | 8100.544253 | 0.195153529  | 0.067321618 | 0.002912517 | 0.014712966 |
| MIR663A        | 4.560096416 | 0.19510588   | 0.397313447 | 0.020326335 | 0.07184473  |
| SERF2-C15ORF63 | 2350.332771 | -0.194928588 | 0.084042874 | 0.015758164 | 0.058558824 |
| HLA-DQA2       | 1620.640269 | -0.194904203 | 0.085531433 | 0.017546571 | 0.063942333 |
| EXTL3          | 1228.169007 | -0.194825372 | 0.084539278 | 0.016360624 | 0.060267373 |
| RPL11          | 41322.19678 | -0.194815681 | 0.061123162 | 0.00113828  | 0.006645904 |
| TXNL1          | 4404.376601 | -0.194814132 | 0.068842785 | 0.003669354 | 0.017788969 |
| SECISBP2       | 1051.794206 | -0.194769894 | 0.089717876 | 0.023015261 | 0.079456792 |
| RPS10P19       | 10764.72424 | -0.19472221  | 0.083134285 | 0.014811057 | 0.05575719  |
| RPS4X          | 72868.22404 | -0.194515833 | 0.066518339 | 0.002841457 | 0.014442473 |
| PSEN1          | 2822.372433 | 0.194417169  | 0.0702858   | 0.004401117 | 0.020693495 |
| JMJD6          | 865.2686833 | -0.194368685 | 0.088409796 | 0.02151585  | 0.075301125 |
| H2BC18         | 133.6032591 | 0.194276697  | 0.393930733 | 0.029008994 | 0.095358532 |
| MNS1           | 3.024161102 | -0.194275869 | 0.398874234 | 0.012567579 | 0.048939233 |
| BTF3           | 25341.49107 | -0.194264813 | 0.063821097 | 0.001914407 | 0.01035023  |
| MPC2           | 4652.661429 | -0.194135688 | 0.065899546 | 0.002531716 | 0.01309099  |
| TSR2           | 1391.585447 | 0.193849091  | 0.080964872 | 0.012820173 | 0.049684233 |
| FAM32A         | 2413.842778 | 0.193811249  | 0.077127647 | 0.009174487 | 0.037899473 |
| GNS            | 4534.640796 | -0.193404911 | 0.064715047 | 0.00220912  | 0.011684587 |
| ECI2           | 1611.738915 | -0.193345285 | 0.077367147 | 0.009708015 | 0.039809069 |
| CCT6A          | 10320.67531 | -0.19331009  | 0.062994002 | 0.001698569 | 0.009355636 |
| TERF2          | 1020.640445 | -0.193255768 | 0.089483497 | 0.023670332 | 0.081232489 |
| WDR82          | 7370.666437 | -0.193213487 | 0.067218822 | 0.003203179 | 0.015974326 |
| COX5B          | 4993.229351 | 0.19312722   | 0.07833444  | 0.010550053 | 0.042606171 |
| CBWD5          | 729.2968872 | -0.193058402 | 0.091550813 | 0.026928939 | 0.089937983 |
| XRCC5          | 18349.75117 | -0.192792007 | 0.067378444 | 0.003342035 | 0.016525989 |
| DNAJB12        | 1104.407711 | 0.192790798  | 0.085649077 | 0.018809882 | 0.067480988 |
| AASDHPTT       | 5173.880411 | -0.192511718 | 0.091409227 | 0.027182014 | 0.090569059 |
| PRKD3          | 2585.927003 | 0.192499285  | 0.081125206 | 0.013614019 | 0.0522968   |
| SMARCB1        | 2639.782238 | 0.192397083  | 0.074311371 | 0.007552769 | 0.032382101 |
| DDHD2          | 1024.223766 | -0.192246609 | 0.092785756 | 0.029580568 | 0.096686805 |
| PEG10          | 8330.706661 | -0.192072936 | 0.079117763 | 0.01186809  | 0.04664542  |
| SELENOS        | 2774.31704  | -0.191436838 | 0.08151763  | 0.014709445 | 0.055502175 |
| PPP6R1         | 2821.474068 | 0.19135258   | 0.083811474 | 0.01719713  | 0.062827575 |
| ATRN           | 1360.528245 | -0.191285045 | 0.081102158 | 0.014322557 | 0.054367322 |
| CSTF2          | 963.8935026 | 0.191048003  | 0.089183377 | 0.024832215 | 0.084439314 |
| PABPN1         | 1094.204309 | 0.190961504  | 0.088060454 | 0.023312291 | 0.080194467 |
| LOC124900510   | 1903.346362 | 0.190884027  | 0.406818853 | 0.000245598 | 0.001753451 |



|          |             |              |             |             |             |
|----------|-------------|--------------|-------------|-------------|-------------|
| USP16    | 2192.303345 | -0.190785664 | 0.07836834  | 0.011686961 | 0.046069451 |
| UQCRH    | 9908.347694 | -0.190757183 | 0.070468482 | 0.005299955 | 0.024203409 |
| YWHAG    | 11690.07482 | -0.190488046 | 0.07005419  | 0.005162023 | 0.023723661 |
| EPC1     | 1562.039936 | -0.190262212 | 0.081566844 | 0.015392511 | 0.057483744 |
| TNFAIP3  | 4052.17862  | 0.189967837  | 0.07118676  | 0.00597668  | 0.026722998 |
| NSD2     | 1356.234541 | 0.189886371  | 0.083109144 | 0.017323087 | 0.063221053 |
| DDX23    | 2661.862089 | 0.189811197  | 0.075106214 | 0.009078191 | 0.037591351 |
| CUEDC2   | 1605.548473 | -0.1893913   | 0.089628088 | 0.026991408 | 0.090077125 |
| TRAPPC10 | 1000.631239 | 0.189316276  | 0.090212858 | 0.027735027 | 0.092009093 |
| RPL31    | 25576.43242 | -0.18909844  | 0.077158755 | 0.011402484 | 0.045288262 |
| SF3B1    | 11863.16303 | -0.189013887 | 0.071554037 | 0.006596119 | 0.028998476 |
| ERGIC3   | 8289.537702 | -0.189012675 | 0.073222999 | 0.007793368 | 0.033256085 |
| DIDO1    | 1905.507353 | -0.188927304 | 0.079081029 | 0.013284125 | 0.051302673 |
| CDS2     | 1983.840414 | -0.188855524 | 0.080285307 | 0.014679033 | 0.055428873 |
| ATMIN    | 1874.559885 | -0.188788106 | 0.077806315 | 0.01198755  | 0.047025679 |
| CORO1C   | 3143.813043 | -0.188687599 | 0.075572176 | 0.009896689 | 0.040467758 |
| DPF2     | 1031.157029 | 0.188608099  | 0.086232828 | 0.022370733 | 0.077852488 |
| CCNE1    | 935.1849351 | -0.188527292 | 0.091202511 | 0.030135657 | 0.098056965 |
| ZBP2     | 3.888780471 | 0.188446058  | 0.388965268 | 0.028620763 | 0.09427985  |
| CEBPZ    | 3141.932335 | -0.188421619 | 0.074370902 | 0.008924769 | 0.037097988 |
| ZDHHC3   | 1979.403758 | -0.188367753 | 0.075038627 | 0.009553749 | 0.039288119 |
| MKRN1    | 2146.58187  | 0.188350643  | 0.071758013 | 0.007041415 | 0.030606473 |
| ARL6IP1  | 5689.831722 | -0.188092076 | 0.081544985 | 0.016504765 | 0.060669289 |
| SNRPD1   | 3417.549509 | -0.187954649 | 0.086420607 | 0.023233313 | 0.080001204 |
| ILRUN    | 2548.652622 | 0.187895552  | 0.075395998 | 0.009928507 | 0.04054999  |
| KDM3B    | 1517.402772 | 0.187809034  | 0.081997389 | 0.017187953 | 0.062807297 |
| GEMIN5   | 1486.048614 | -0.187701338 | 0.077756306 | 0.012464262 | 0.048600648 |
| GCN1     | 3337.324446 | -0.18721165  | 0.076618483 | 0.011533338 | 0.045683009 |
| RPRD1B   | 1932.41718  | -0.186921569 | 0.082841541 | 0.01899425  | 0.067959385 |
| TYW3     | 1010.709844 | -0.186667363 | 0.089764005 | 0.029365333 | 0.096186338 |
| EMC7     | 3148.337448 | -0.186624083 | 0.073616039 | 0.008946768 | 0.037176718 |
| RNU1-1   | 5.400868021 | 0.186544258  | 0.391662451 | 0.015011633 | 0.056345376 |
| CAMK2N1  | 3.243708314 | 0.186471722  | 0.388497049 | 0.026345613 | 0.088450364 |
| SAR1A    | 2693.287557 | -0.186288182 | 0.075213887 | 0.01054062  | 0.04258794  |
| SRI      | 1238.403628 | -0.186259121 | 0.081849095 | 0.018092961 | 0.065465065 |
| CAT      | 1098.809755 | 0.186209912  | 0.083525955 | 0.020257699 | 0.071650853 |
| BST2     | 4915.253031 | -0.186138123 | 0.075362099 | 0.010773232 | 0.043275356 |
| COA1     | 2919.14616  | -0.185633491 | 0.075746642 | 0.011344564 | 0.045129366 |
| KLHDC3   | 2847.202849 | 0.185466749  | 0.081594903 | 0.018173214 | 0.065714252 |
| RPL24    | 31733.85093 | -0.185038643 | 0.069795983 | 0.006430565 | 0.02839319  |
| THUMP3   | 1105.769648 | -0.184591453 | 0.086801065 | 0.026677293 | 0.089321478 |
| GPX7     | 1354.175281 | -0.184373411 | 0.077862906 | 0.014208252 | 0.054009998 |
| CELF2    | 4627.299692 | 0.184200487  | 0.088483134 | 0.029303335 | 0.096052592 |
| ARFGAP3  | 1284.993821 | -0.18419557  | 0.08438568  | 0.023023813 | 0.079470474 |
| TGIF2    | 1989.271604 | -0.183941597 | 0.074010254 | 0.010419146 | 0.042189668 |
| VAPA     | 5258.834763 | -0.18359119  | 0.064749893 | 0.003727608 | 0.017999996 |
| CBL      | 1762.172402 | 0.183119618  | 0.078290393 | 0.015324544 | 0.057265494 |
| PRPF4    | 2596.132388 | -0.182574857 | 0.07109732  | 0.008236785 | 0.03469628  |
| ANAPC1   | 1924.81802  | -0.182454754 | 0.073713462 | 0.010691324 | 0.043038613 |
| AHCYL1   | 1892.20018  | 0.182225893  | 0.082900146 | 0.022121731 | 0.07709439  |

|              |             |              |             |             |             |
|--------------|-------------|--------------|-------------|-------------|-------------|
| DYNC1H1      | 4109.787554 | 0.182030766  | 0.081182456 | 0.019756776 | 0.070194521 |
| SETX         | 2553.283965 | 0.181940303  | 0.085762572 | 0.026740539 | 0.089464049 |
| PDE6D        | 970.5161508 | 0.181796223  | 0.087363907 | 0.029602791 | 0.096741184 |
| SF3B6        | 3377.273281 | -0.181256662 | 0.0838105   | 0.024354931 | 0.083104302 |
| ATOX1        | 1381.4678   | -0.180933719 | 0.084480885 | 0.025808261 | 0.086932826 |
| COX6B1       | 7491.369108 | 0.18049419   | 0.066167389 | 0.005142481 | 0.023640121 |
| NXPE3        | 3391.102445 | 0.18043913   | 0.085140384 | 0.027038882 | 0.090218173 |
| NELFCD       | 3140.676261 | -0.180318036 | 0.072481128 | 0.010389869 | 0.042106566 |
| FLAD1        | 1412.990172 | -0.180017171 | 0.079591463 | 0.019077634 | 0.068229529 |
| LOC105370259 | 3.031943087 | 0.179931202  | 0.386146266 | 0.011534397 | 0.045683009 |
| NUP205       | 3993.964913 | -0.179749634 | 0.067384477 | 0.006216044 | 0.027607906 |
| GAGE1        | 2130.005616 | -0.17963853  | 0.078479212 | 0.017793175 | 0.064623408 |
| EXOSC8       | 1161.557065 | 0.179549176  | 0.08516151  | 0.027847498 | 0.092364514 |
| LOC124905321 | 5.178280207 | 0.179531816  | 0.384600006 | 0.01765786  | 0.064212761 |
| TFG          | 2642.946739 | -0.17930352  | 0.076352524 | 0.015227043 | 0.056964074 |
| NAP1L1       | 32611.48732 | -0.179302088 | 0.078611538 | 0.019429115 | 0.069257716 |
| HK2          | 4396.425142 | -0.17929583  | 0.068742085 | 0.007416775 | 0.031941381 |
| RNA5-8SN4    | 952.5250996 | 0.179280715  | 0.394054637 | 0.000255262 | 0.001811786 |
| RNA5-8SN1    | 954.396968  | 0.179215645  | 0.393993226 | 0.000253804 | 0.001804979 |
| RNA5-8SN2    | 954.396968  | 0.179215645  | 0.393993226 | 0.000253804 | 0.001804979 |
| RNA5-8SN3    | 954.396968  | 0.179215645  | 0.393993226 | 0.000253804 | 0.001804979 |
| RNA5-8SN5    | 953.9062094 | 0.179210806  | 0.393986643 | 0.000254344 | 0.001807338 |
| ICE1         | 1989.465967 | -0.179007383 | 0.085694745 | 0.02915781  | 0.095738679 |
| PAIP2        | 5100.900847 | -0.178738776 | 0.077481609 | 0.017034373 | 0.062318401 |
| IFNGR2       | 2065.032047 | 0.178576228  | 0.078438145 | 0.01825901  | 0.065915714 |
| HIF1AN       | 1133.025788 | 0.178576056  | 0.08618198  | 0.030488208 | 0.098888238 |
| XBP1         | 3425.621655 | -0.17848159  | 0.078024474 | 0.017910432 | 0.064999611 |
| SMG7         | 1304.424074 | 0.17809087   | 0.085584481 | 0.029935216 | 0.097595768 |
| MICU1        | 1619.927961 | -0.17800154  | 0.08514801  | 0.029426671 | 0.096311029 |
| POM121       | 2573.846736 | -0.177886557 | 0.085067176 | 0.02941571  | 0.09630407  |
| DTL          | 2526.278854 | -0.177611653 | 0.079750156 | 0.020935914 | 0.073643555 |
| MESD         | 3059.681463 | -0.177576862 | 0.068728197 | 0.007955741 | 0.033758775 |
| CASP2        | 1806.00868  | 0.177383541  | 0.0768728   | 0.016932953 | 0.061993225 |
| ASNSD1       | 2228.518717 | -0.177354999 | 0.083332229 | 0.026859991 | 0.089776967 |
| CUL1         | 2557.691218 | -0.177308474 | 0.069784659 | 0.009005234 | 0.037333883 |
| SHMT1        | 3438.78246  | 0.177091349  | 0.072561275 | 0.011833103 | 0.046539595 |
| AMZ2         | 1681.338475 | -0.176790331 | 0.080083478 | 0.02208338  | 0.076991725 |
| BLMH         | 4544.132923 | -0.176775043 | 0.06508834  | 0.005408552 | 0.024634375 |
| PTPN2        | 1453.106355 | -0.176632966 | 0.07746619  | 0.018284301 | 0.065964425 |
| MIR3648-2    | 35.01705876 | 0.176513659  | 0.387702043 | 0.003648451 | 0.017722364 |
| UBA1         | 8944.171441 | 0.17628515   | 0.079516941 | 0.021456547 | 0.075154335 |
| RNU1-2       | 4.174093363 | 0.176262463  | 0.385348872 | 0.006583076 | 0.028948481 |
| ATP5MJ       | 4303.651657 | -0.176215058 | 0.07293052  | 0.012845818 | 0.049759457 |
| TXNRD1       | 7403.479794 | -0.175843939 | 0.064096734 | 0.004992897 | 0.023044241 |
| RAB1B        | 2499.988218 | 0.175772539  | 0.08266643  | 0.02695232  | 0.089981363 |
| NAXE         | 3732.346085 | -0.175470415 | 0.085406866 | 0.030721384 | 0.099495458 |
| CCDC47       | 6614.641003 | -0.175245922 | 0.077317572 | 0.01913626  | 0.068396825 |
| RHOA         | 10706.74212 | -0.174929657 | 0.06214003  | 0.004033553 | 0.019231052 |
| VWA8         | 1721.390412 | -0.174912169 | 0.07616559  | 0.0175962   | 0.064069258 |
| HMGNP41      | 2488.786571 | 0.174849912  | 0.074109659 | 0.01476021  | 0.055612062 |

|              |             |              |             |             |             |
|--------------|-------------|--------------|-------------|-------------|-------------|
| FOXK2        | 1977.168315 | 0.174823029  | 0.078009181 | 0.020236287 | 0.071589741 |
| MPHOSPH10    | 1757.855763 | -0.17481568  | 0.078643185 | 0.021299967 | 0.074711673 |
| H2AC11       | 79.83081824 | 0.174600816  | 0.383416395 | 0.009507539 | 0.039142129 |
| ARNT         | 8281.620319 | -0.174543585 | 0.061529182 | 0.003770912 | 0.018164362 |
| APEH         | 2163.102571 | -0.174241712 | 0.08086644  | 0.025327565 | 0.085764067 |
| NCAPD2       | 4547.550713 | 0.174206469  | 0.074479943 | 0.01571712  | 0.058443926 |
| POU2AF1      | 6290.681511 | -0.17413558  | 0.078282606 | 0.021333928 | 0.074800492 |
| ANP32A       | 4527.47656  | 0.173858091  | 0.080741434 | 0.025269963 | 0.085602494 |
| CNPY2        | 2483.172582 | -0.17379479  | 0.081809882 | 0.027401246 | 0.091128747 |
| ZNF317       | 1538.738676 | 0.173725109  | 0.076839037 | 0.019266689 | 0.06882039  |
| CLIC1        | 13713.81203 | 0.173571726  | 0.063116131 | 0.00488923  | 0.022668488 |
| BAG6         | 3688.63418  | 0.173397875  | 0.080265344 | 0.024668399 | 0.083991874 |
| ASNS         | 3656.533744 | 0.173203304  | 0.073073453 | 0.014496185 | 0.054867788 |
| NPEPPS       | 2496.047687 | -0.173075732 | 0.069391818 | 0.010379059 | 0.042073342 |
| NOP2         | 2002.340801 | -0.172856217 | 0.08194044  | 0.028452255 | 0.093849085 |
| FASTKD2      | 2916.060639 | -0.172793079 | 0.078857837 | 0.023310912 | 0.080194467 |
| RN7SKP80     | 468.1530191 | 0.172594185  | 0.3861908   | 0.00103218  | 0.00610668  |
| UQCRC1       | 5377.558902 | -0.172271134 | 0.07891319  | 0.023725029 | 0.08138794  |
| GNB1         | 8607.70409  | -0.172171491 | 0.067287624 | 0.008814813 | 0.036702602 |
| TRBJ2-2P     | 3.413665147 | 0.172088631  | 0.376452026 | 0.027169383 | 0.090569059 |
| SMG8         | 1916.19281  | -0.171812547 | 0.07440036  | 0.01721127  | 0.062865968 |
| LOC124900412 | 3.160664971 | 0.171650795  | 0.378949611 | 0.012053665 | 0.047184644 |
| GMPS         | 2452.014752 | 0.171524389  | 0.073104518 | 0.015476767 | 0.057711277 |
| PSMD3        | 5613.315236 | 0.171284039  | 0.081233963 | 0.028430234 | 0.093812186 |
| CZ1P-ASNS    | 3658.453605 | 0.171193079  | 0.07335374  | 0.01605398  | 0.059428555 |
| DNMT1        | 2787.591423 | 0.17110585   | 0.07489003  | 0.018198857 | 0.065784607 |
| CFL1         | 16912.63397 | 0.170759746  | 0.068229705 | 0.0101138   | 0.041161147 |
| FKBP4        | 6899.617781 | -0.170747503 | 0.067979061 | 0.009944286 | 0.040585717 |
| MAX          | 1696.431782 | 0.170658802  | 0.07892517  | 0.024882059 | 0.084553102 |
| NUP155       | 1860.413649 | 0.170515105  | 0.074153749 | 0.017594407 | 0.064069258 |
| NRBP1        | 2799.258052 | 0.170375032  | 0.076980242 | 0.021905706 | 0.076449235 |
| EIF2A        | 3657.045854 | -0.17036505  | 0.073109159 | 0.016321901 | 0.060163125 |
| HNRNPC       | 19846.83776 | -0.170247277 | 0.066071319 | 0.008311824 | 0.034961343 |
| NDUFA6       | 2857.213706 | 0.170010285  | 0.071461567 | 0.014212829 | 0.054009998 |
| CMSS1        | 2728.575011 | -0.169994921 | 0.074242357 | 0.018169363 | 0.065714049 |
| TPM4         | 5418.636529 | 0.169879224  | 0.072597402 | 0.015837924 | 0.058779712 |
| WBP11        | 3879.433989 | -0.169644577 | 0.070996    | 0.013959727 | 0.053318335 |
| OXA1L        | 3086.617595 | -0.169513462 | 0.080248572 | 0.02862096  | 0.09427985  |
| FTH1         | 12295.94536 | 0.169440211  | 0.078719589 | 0.02561288  | 0.086442847 |
| EEF1D        | 9231.027762 | -0.169289462 | 0.074376057 | 0.018986792 | 0.067946739 |
| MSL1         | 1394.827568 | -0.169221031 | 0.081110983 | 0.030385726 | 0.098592771 |
| PDAP1        | 2365.437965 | -0.169196837 | 0.072193461 | 0.015824646 | 0.058755443 |
| VPS25        | 2051.32934  | -0.168951504 | 0.07852092  | 0.025925034 | 0.087292207 |
| TIMM44       | 1814.304503 | -0.16888697  | 0.078366273 | 0.025678229 | 0.086586428 |
| EML4         | 3795.047714 | 0.168812311  | 0.076908213 | 0.022896992 | 0.079190576 |
| TMEM199      | 1155.872541 | 0.168520055  | 0.080639957 | 0.029917282 | 0.097584776 |
| SIN3A        | 1666.749007 | 0.168430972  | 0.075091046 | 0.020480651 | 0.072262312 |
| ERGIC1       | 6887.253614 | 0.168138969  | 0.071810971 | 0.015800476 | 0.058703211 |
| TRIP12       | 4883.310182 | 0.168099935  | 0.069754823 | 0.013172504 | 0.05092839  |
| EMC4         | 2329.232393 | -0.168053406 | 0.075459151 | 0.021473488 | 0.075198461 |

|          |             |              |             |             |             |
|----------|-------------|--------------|-------------|-------------|-------------|
| SON      | 9553.523157 | -0.167890676 | 0.065455208 | 0.008809023 | 0.036687312 |
| SRSF7    | 9348.03934  | -0.167883895 | 0.067893311 | 0.011146432 | 0.044485541 |
| SEC61A1  | 21324.92198 | -0.167648965 | 0.067902126 | 0.011298363 | 0.044977875 |
| NUDC     | 2735.429851 | 0.166989933  | 0.071326931 | 0.01596413  | 0.059159178 |
| ANAPC7   | 1288.455009 | 0.166814653  | 0.079754093 | 0.029961863 | 0.097619864 |
| RPL4P4   | 6199.045796 | -0.166720334 | 0.062751333 | 0.006489566 | 0.028609933 |
| ATXN10   | 2858.786448 | -0.166520199 | 0.071896002 | 0.01711857  | 0.062598519 |
| CPD      | 3345.592376 | -0.166161222 | 0.076883838 | 0.025445921 | 0.086047063 |
| AKAP13   | 1609.596562 | 0.166160744  | 0.079064662 | 0.029320553 | 0.096090844 |
| RECQL    | 2747.313793 | -0.166102129 | 0.07928845  | 0.029936027 | 0.097595768 |
| KHSRP    | 7113.451323 | 0.165718462  | 0.070494022 | 0.015516966 | 0.057823823 |
| MFN2     | 2885.751676 | 0.165582728  | 0.075286298 | 0.023060712 | 0.079581976 |
| TOMM40L  | 1403.913976 | 0.165543143  | 0.079161605 | 0.030105621 | 0.098014485 |
| RPL37    | 59351.99298 | -0.165251025 | 0.068472465 | 0.014131531 | 0.053760045 |
| PTCD3    | 3861.949822 | -0.165093911 | 0.067308898 | 0.011861806 | 0.046631305 |
| SPATS2   | 1777.779251 | -0.164685475 | 0.074329265 | 0.02224608  | 0.077480968 |
| S100A10  | 2943.072059 | -0.164460021 | 0.071544809 | 0.017982171 | 0.065173138 |
| UBE2I    | 2594.347065 | -0.16434884  | 0.071422608 | 0.01794586  | 0.065068772 |
| EIF3I    | 6759.228608 | -0.164237387 | 0.068379415 | 0.013752332 | 0.052734528 |
| SUN1     | 2898.972997 | -0.16420987  | 0.070736372 | 0.01697033  | 0.062116932 |
| PEA15    | 2948.359773 | -0.164170971 | 0.069399627 | 0.015078582 | 0.056530808 |
| LIMD1    | 1459.728885 | -0.164011694 | 0.07670663  | 0.027046199 | 0.090225203 |
| SPTLC2   | 1266.072593 | -0.163709476 | 0.078510052 | 0.030882718 | 0.099860067 |
| ESD      | 2973.543669 | -0.163625274 | 0.07332756  | 0.021511015 | 0.075299423 |
| FOCAD    | 1689.952913 | -0.163492861 | 0.077628114 | 0.029143265 | 0.095709068 |
| PLP2     | 6928.356686 | 0.163067696  | 0.076342515 | 0.027207904 | 0.090572718 |
| TSPYL5   | 1937.128653 | -0.162663323 | 0.073581454 | 0.022682267 | 0.078652146 |
| ATP6V0E1 | 5190.012063 | -0.162613321 | 0.068883832 | 0.01546098  | 0.057664825 |
| ERAP1    | 4565.323821 | -0.162552954 | 0.066927266 | 0.012689843 | 0.049293408 |
| DCTD     | 2181.804657 | 0.161464106  | 0.07675929  | 0.029542878 | 0.096600079 |
| UBE2Q1   | 3738.14063  | -0.161142729 | 0.067763497 | 0.014762872 | 0.055612062 |
| ICMT     | 2756.337433 | 0.161083657  | 0.068313154 | 0.015454046 | 0.05765138  |
| PSMA2    | 8571.067075 | -0.161014246 | 0.068605879 | 0.015012853 | 0.056345376 |
| DNAJA1   | 7952.115927 | -0.160763389 | 0.070377008 | 0.0187773   | 0.067378057 |
| ISCU     | 2808.600563 | -0.160250181 | 0.069958078 | 0.018583179 | 0.066833833 |
| DDOST    | 14272.40382 | -0.160176493 | 0.076219711 | 0.029948831 | 0.097595768 |
| NOP56    | 5642.697516 | -0.159745956 | 0.074235189 | 0.026658066 | 0.089274361 |
| ECPAS    | 2512.810951 | -0.159697435 | 0.071249579 | 0.021111925 | 0.074172288 |
| NACA     | 34708.17268 | -0.159197189 | 0.065873535 | 0.013324734 | 0.051436563 |
| PRR13    | 2676.847201 | 0.159012769  | 0.072137039 | 0.023205801 | 0.079955205 |
| PRCP     | 3397.625636 | -0.158564035 | 0.074382992 | 0.027900544 | 0.092469612 |
| TKT      | 11859.58936 | -0.158495588 | 0.07149971  | 0.022527489 | 0.078273677 |
| RN7SK    | 3036.681396 | 0.158290045  | 0.374109043 | 0.000476722 | 0.003129108 |
| RPL12    | 42849.98504 | -0.157974127 | 0.061213312 | 0.007613893 | 0.032603806 |
| IARS1    | 8547.671056 | -0.157790202 | 0.063036281 | 0.010482117 | 0.042391131 |
| PSMD1    | 7325.054769 | -0.157736077 | 0.0625714   | 0.010281269 | 0.041744605 |
| ESYT1    | 7838.17608  | 0.157466211  | 0.07405197  | 0.02817662  | 0.093117277 |
| ERAP2    | 3819.089324 | 0.157277389  | 0.072876022 | 0.026044233 | 0.087608387 |
| RNA18SN2 | 86634.54653 | 0.156746488  | 0.373500098 | 0.000107349 | 0.000846273 |
| RNA18SN3 | 86634.82812 | 0.156746032  | 0.373499706 | 0.000107349 | 0.000846273 |

|              |             |              |             |             |             |
|--------------|-------------|--------------|-------------|-------------|-------------|
| RNA18SN4     | 86627.3309  | 0.156737718  | 0.373492789 | 0.000107295 | 0.000846273 |
| ACO2         | 6461.376736 | 0.156731857  | 0.070586528 | 0.022314638 | 0.077672882 |
| RNA18SN1     | 86158.25241 | 0.156674937  | 0.373438737 | 0.000107417 | 0.000846284 |
| RNA18SN5     | 86138.74609 | 0.156657871  | 0.373424178 | 0.000107366 | 0.000846273 |
| SLC25A4      | 2356.621829 | 0.155829476  | 0.072938014 | 0.027580472 | 0.091619228 |
| CCNY         | 2056.40632  | 0.154836952  | 0.073679092 | 0.030116555 | 0.09803165  |
| SNORA73A     | 262.3571146 | 0.154536838  | 0.363847543 | 0.02624383  | 0.088142826 |
| PSMC5        | 5546.74287  | 0.154327961  | 0.065972923 | 0.016424139 | 0.060449906 |
| RNU1-4       | 3.624333137 | 0.154095095  | 0.365705289 | 0.011238811 | 0.044802599 |
| SMAD2        | 2641.695681 | 0.153289062  | 0.071448904 | 0.027214246 | 0.090576418 |
| FXR1         | 3357.286136 | 0.153015536  | 0.07150901  | 0.027387883 | 0.091113302 |
| H1-3         | 33.46418672 | 0.152849104  | 0.36431593  | 0.016674512 | 0.061137523 |
| RNU1-3       | 3.792544837 | 0.152696307  | 0.362301442 | 0.027089245 | 0.090333999 |
| HADHA        | 9050.620758 | -0.152329402 | 0.062338787 | 0.012528901 | 0.048810571 |
| RPL38        | 16119.79857 | -0.151576965 | 0.065275234 | 0.018028514 | 0.065313761 |
| PPIA         | 48335.62361 | -0.151008156 | 0.061622992 | 0.012327946 | 0.048168557 |
| H2BC7        | 34.39744264 | 0.150629804  | 0.363259658 | 0.013977821 | 0.053327588 |
| SCARNA2      | 45.68333326 | 0.150280392  | 0.367663033 | 0.00036233  | 0.00245961  |
| RPS11        | 68031.72492 | -0.150064021 | 0.067539653 | 0.023237631 | 0.080001204 |
| HSPA9        | 21436.94335 | -0.149584037 | 0.059469855 | 0.010379241 | 0.042073342 |
| PSME4        | 2891.129924 | -0.148607268 | 0.070662274 | 0.030614407 | 0.09926038  |
| RUVBL1       | 3607.805132 | -0.148069594 | 0.068011469 | 0.025501502 | 0.086201348 |
| PCBP2        | 16048.54765 | 0.147720975  | 0.05981277  | 0.011115791 | 0.04438371  |
| HLA-DRA      | 18753.67921 | -0.14709729  | 0.06430153  | 0.018151561 | 0.065663376 |
| ATP5F1B      | 59861.91626 | 0.147079872  | 0.069834582 | 0.029904796 | 0.097562426 |
| TMEM248      | 3698.802672 | -0.146630967 | 0.068951559 | 0.029366355 | 0.096186338 |
| NSUN2        | 4105.416344 | -0.145810329 | 0.066489304 | 0.024683406 | 0.084026447 |
| TPD52L2      | 2772.224133 | -0.145719904 | 0.068029283 | 0.028561588 | 0.094191775 |
| CDC6         | 4830.242245 | -0.14520608  | 0.064073657 | 0.020489159 | 0.072277605 |
| SNORD15B     | 28.81466478 | 0.144471352  | 0.360772001 | 0.00553573  | 0.025094825 |
| ALG9         | 5980.872804 | -0.14269594  | 0.065227709 | 0.025112839 | 0.085175576 |
| HMGN2        | 8002.452209 | 0.142487506  | 0.064250396 | 0.02313887  | 0.079765582 |
| ACAT1        | 6820.874751 | -0.142278022 | 0.065553496 | 0.02787901  | 0.092451325 |
| C1QBP        | 15157.67204 | -0.138878304 | 0.061383347 | 0.020308159 | 0.071799997 |
| RPL19        | 80650.76976 | -0.137974524 | 0.061922907 | 0.02294212  | 0.079288124 |
| RMRP         | 1631.279453 | 0.137636338  | 0.357944616 | 0.000459264 | 0.003034364 |
| HNRNPK       | 25166.42451 | -0.135959418 | 0.064279047 | 0.030732895 | 0.099514127 |
| H4C5         | 86.70549995 | 0.13578519   | 0.353114078 | 0.015569719 | 0.057958848 |
| SF3B3        | 8931.940848 | -0.135610216 | 0.063386825 | 0.028865449 | 0.095024695 |
| PCBP1        | 14859.14959 | -0.135315231 | 0.060990076 | 0.023591803 | 0.081027158 |
| H1-5         | 87.85816769 | 0.134067082  | 0.354552918 | 0.002267206 | 0.011940756 |
| PPIAP22      | 15732.49267 | -0.133701928 | 0.062627467 | 0.029651333 | 0.096863258 |
| RPPH1        | 954.976595  | 0.127875322  | 0.351169009 | 0.0005789   | 0.003710673 |
| LOC124904619 | 183.7958474 | 0.12701292   | 0.35086481  | 0.000256384 | 0.001817063 |
| H3C7         | 27.14277882 | 0.124344795  | 0.346092445 | 0.01646221  | 0.060564285 |
| H2AC21       | 22.62447242 | 0.123179616  | 0.347938532 | 0.001289136 | 0.007353088 |
| H2AC12       | 43.41068933 | 0.123022178  | 0.34773587  | 0.001393536 | 0.00788108  |
| H3C12        | 28.3796924  | 0.121094073  | 0.344897125 | 0.010950114 | 0.043843497 |
| LOC124905331 | 43.07914039 | 0.10718493   | 0.337561887 | 0.010088196 | 0.041076248 |
| H3C2         | 81.92944956 | 0.103097215  | 0.336495367 | 0.00159624  | 0.008873864 |

|          |             |             |             |             |             |
|----------|-------------|-------------|-------------|-------------|-------------|
| H2BC10   | 37.81222801 | 0.103018903 | 0.33572467  | 0.007716373 | 0.032977402 |
| H2BC3    | 15.15847266 | 0.102201881 | 0.335428481 | 0.006724199 | 0.029456856 |
| SCARNA7  | 9.942884    | 0.091217049 | 0.330509452 | 0.0051688   | 0.02373658  |
| SCARNA5  | 10.3068922  | 0.088501443 | 0.329694692 | 0.001280183 | 0.007314062 |
| H4C2     | 43.60461936 | 0.081700524 | 0.326342412 | 0.010674148 | 0.042997029 |
| SNORD133 | 29.24093075 | 0.073158157 | 0.323711673 | 0.001173474 | 0.006810374 |
| RNU4-1   | 82.488933   | 0.068773636 | 0.321997265 | 0.005447759 | 0.02474786  |
| RNU4-2   | 82.70711221 | 0.047016177 | 0.316037661 | 0.007017219 | 0.030530746 |

# Supplementary Table S3

|           | AMO-1          |             |             | BM-MNC         |                       |                       |
|-----------|----------------|-------------|-------------|----------------|-----------------------|-----------------------|
|           | log2FoldChange | pvalue      | padj        | log2FoldChange | pvalue                | padj                  |
| GBP4      | 6.224469149    | 5.90E-77    | 3.00E-74    | 0.725850105    | 1.35E-157             | 2.88E-153             |
| RGS9      | 5.251009442    | 5.64E-70    | 6.51E-28    | 3.376322132    | 3.33E-279             | 7.11E-275             |
| CLIC2     | -4.76969591    | 1.53E-72    | 7.38E-70    | -1.20567701    | 2.06E-121             | 4.41E-117             |
| MAP2      | 3.933701071    | 1.43E-06    | 1.74E-05    | 0.259649733    | 1.61E-11              | 3.44E-07              |
| TNFSF9    | -3.712068328   | 1.12E-211   | 3.23E-208   | -1.192449855   | 1.95E-11              | 4.17E-07              |
| TCEAL9    | -3.527944821   | 3.67E-07    | 5.05E-06    | -1.187320406   | 4.64E-54              | 9.92E-50              |
| EPST11    | 3.510372488    | 8.34E-11    | 2.01E-09    | 0.994251705    | 1.01E-12              | 2.16E-08              |
| LY96      | -2.913856489   | 7.21E-29    | 7.61E-27    | -1.565670048   | 0                     | 0                     |
| AREG      | -2.835708899   | 3.36E-05    | 0.000301899 | -3.813613138   | 0                     | 0                     |
| RGS2      | -2.689502122   | 1.00E-104   | 8.69E-102   | -0.601916592   | 8.16E-51              | 1.74E-46              |
| APOL3     | 2.689404919    | 1.11E-85    | 7.09E-83    | 3.309008404    | 0                     | 0                     |
| NR4A1     | -2.546387393   | 7.83E-87    | 5.65E-84    | -1.004626805   | 1.55E-178             | 3.32E-174             |
| RNF43     | -2.476777415   | 8.53E-08    | 1.31E-06    | -1.848085545   | 5.80E-08              | 0.001238983           |
| NR4A2     | -2.456137346   | 4.64E-46    | 1.11E-43    | -0.494141535   | 7.30E-76              | 1.56E-71              |
| CYSLTR1   | -2.339376787   | 2.86E-27    | 2.81E-25    | -0.731639782   | 4.90E-58              | 1.05E-53              |
| RNF144B   | 2.209670383    | 0.000189098 | 0.001390492 | 0.681272897    | 1.16E-49              | 2.49E-45              |
| ATF3      | -2.073807503   | 2.36E-152   | 4.53E-149   | -0.451269471   | 5.35E-288             | 1.14E-283             |
| GATA3     | 1.956167325    | 3.82E-06    | 4.21E-05    | 1.387247794    | 1.66E-43              | 3.54E-39              |
| DUSP26    | -1.745926356   | 6.98E-05    | 0.000579125 | -3.159885614   | 3.67E-105             | 7.83E-101             |
| IER5      | -1.509266925   | 3.02E-35    | 4.43E-33    | -0.679708655   | 0                     | 0                     |
| FOS       | -1.475895341   | 2.75E-35    | 4.11E-33    | -0.797007171   | 0                     | 0                     |
| KMT2E-AS1 | -1.442585046   | 3.27E-06    | 3.67E-05    | -1.480924046   | 2.20E-152             | 4.70E-148             |
| DUSP5     | -1.281344761   | 2.85E-52    | 8.22E-50    | -1.597128069   | 0                     | 0                     |
| JUN       | -1.235457871   | 9.61E-47    | 2.41E-44    | -2.86322098    | 0                     | 0                     |
| TXNIP     | -1.196427569   | 2.18E-65    | 8.99E-63    | -1.197487688   | 0                     | 0                     |
| MOB3B     | 1.167674385    | 0.008979153 | 0.037252513 | 1.822037765    | 6.11E-95              | 1.31E-90              |
| CXCR3     | 1.150463326    | 1.16E-07    | 1.76E-06    | 2.032899187    | 1.58E-24              | 3.37E-20              |
| HOPX      | 1.088146018    | 0.000183359 | 0.001354616 | 1.685368902    | 0                     | 0                     |
| CCDC141   | 1.077406261    | 3.50E-17    | 1.70E-15    | 2.313711171    | 6.42E-106             | 1.37E-101             |
| PFN2      | -1.058772684   | 2.82E-09    | 5.53E-08    | -1.518772448   | 4.83E-70              | 1.03E-65              |
| APOBEC3F  | 1.046862372    | 2.63E-21    | 1.80E-19    | 0.658999765    | 7.33E-29              | 1.56E-24              |
| HSPA1B    | -0.987031042   | 4.91E-17    | 2.36E-15    | -3.589401052   | 0                     | 0                     |
| TCF4      | 0.984712743    | 9.01E-23    | 6.84E-21    | 0.381815775    | 0                     | 0                     |
| HOMER1    | -0.962762045   | 1.99E-10    | 4.54E-09    | -0.766265678   | 7.72E-49              | 1.65E-44              |
| DDIT4     | -0.952586571   | 1.14E-22    | 8.54E-21    | -1.705858436   | 0                     | 0                     |
| ZNF227    | 0.948909722    | 1.20E-11    | 3.32E-10    | 0.295773451    | 2.95E-21              | 6.30E-17              |
| ARL4C     | 0.936102265    | 1.34E-45    | 3.09E-43    | 0.341665125    | 5.17E-152             | 1.10E-147             |
| LINC01801 | 0.902833594    | 0.008471695 | 0.035513032 | 1.337291083    | 1.14E-07              | 0.002427537           |
| DEPDC1    | 0.895368693    | 4.02E-11    | 1.02E-09    | 3.002123388    | 0                     | 0                     |
| UBE2L6    | 0.891036147    | 1.49E-30    | 1.79E-28    | 0.899486838    | 3.42E-258             | 7.31E-254             |
| NCAM1     | -0.890481405   | 1.38E-17    | 6.95E-16    | -0.872196021   | 5.61E-178             | 1.20E-173             |
| ABCG1     | 0.889831304    | 8.09E-11    | 1.96E-09    | 2.456787824    | 4.47E-206             | 9.55E-202             |
| CD180     | -0.882939028   | 2.34E-13    | 8.04E-12    | -0.810733678   | 3.00E-69              | 6.41E-65              |
| CTNNA2    | 0.882146697    | 1.69E-09    | 3.43E-08    | 1.601255931    | 1.77E-75              | 3.77E-71              |
| SEL1L3    | 0.832923854    | 6.53E-10    | 1.41E-08    | 0.508172254    | 4.94065645841247e-323 | 1.05517599982315e-318 |
| SQSTM1    | -0.831196598   | 9.84E-19    | 5.37E-17    | -0.867244032   | 0                     | 0                     |
| PNRC1     | -0.83080935    | 2.00E-19    | 1.18E-17    | -0.358745578   | 0                     | 0                     |
| SAMD9L    | 0.823471815    | 1.55E-17    | 7.79E-16    | 0.718269431    | 0                     | 0                     |
| BRD2      | -0.823212474   | 5.13E-36    | 8.45E-34    | -0.390686753   | 8.25E-194             | 1.76E-189             |
| GSN       | 0.810974397    | 6.44E-05    | 0.000539967 | 2.115799411    | 1.41E-45              | 3.01E-41              |
| KIF20A    | 0.803767293    | 3.39E-17    | 1.65E-15    | 2.093690288    | 1.28E-105             | 2.74E-101             |
| SDC1      | -0.784404833   | 5.13E-23    | 3.95E-21    | -0.836448893   | 7.17E-262             | 1.53E-257             |
| TBXAS1    | -0.780620491   | 0.004065719 | 0.019363602 | -0.443369748   | 5.79E-45              | 1.24E-40              |
| NME7      | -0.779369046   | 1.23E-06    | 1.52E-05    | -0.342373301   | 1.31E-29              | 2.79E-25              |
| CKAP2L    | 0.7586559      | 4.15E-11    | 1.05E-09    | 2.287351814    | 1.54E-234             | 3.29E-230             |
| KIF3C     | 0.757467029    | 2.24E-07    | 3.21E-06    | 0.279181038    | 2.07E-21              | 4.42E-17              |
| PTPN18    | 0.753411944    | 1.81E-15    | 7.72E-14    | 0.732420305    | 3.61E-151             | 7.70E-147             |
| LINC02551 | 0.753231632    | 0.00292272  | 0.014747302 | 1.577747691    | 4.92E-247             | 1.05E-242             |
| COPS4     | -0.733143356   | 6.19E-15    | 2.50E-13    | -0.250987605   | 1.53E-14              | 3.27E-10              |
| ADAM28    | 0.733023471    | 1.37E-07    | 2.04E-06    | 2.202429331    | 0                     | 0                     |

|          |              |             |             |              |           |           |
|----------|--------------|-------------|-------------|--------------|-----------|-----------|
| IQSEC1   | -0.732059053 | 3.67E-13    | 1.23E-11    | -0.676724714 | 8.88E-49  | 1.90E-44  |
| ADGRG5   | 0.719570457  | 5.61E-10    | 1.22E-08    | 1.640460094  | 6.43E-274 | 1.37E-269 |
| SYTL3    | -0.716324898 | 2.09E-06    | 2.46E-05    | -1.308557033 | 7.35E-11  | 1.57E-06  |
| WNT10A   | -0.703783248 | 1.05E-08    | 1.87E-07    | -0.930773276 | 8.24E-32  | 1.76E-27  |
| FAM111A  | 0.70092349   | 2.57E-09    | 5.08E-08    | 1.164817089  | 0         | 0         |
| KLRF1    | 0.685095606  | 8.08E-05    | 0.000658136 | 0.625650228  | 1.23E-11  | 2.63E-07  |
| IL6R     | -0.668448401 | 1.02E-15    | 4.49E-14    | -2.223770292 | 0         | 0         |
| CLCN4    | 0.66284233   | 1.46E-09    | 3.00E-08    | 1.419365805  | 7.50E-65  | 1.60E-60  |
| DNAJB9   | -0.66264028  | 9.68E-07    | 1.22E-05    | -0.782020261 | 0         | 0         |
| ESAM     | 0.660396618  | 0.009477321 | 0.039029434 | 0.487915129  | 5.05E-22  | 1.08E-17  |
| ANLN     | 0.65677174   | 4.11E-09    | 7.86E-08    | 1.704160244  | 3.59E-112 | 7.67E-108 |
| PIK3AP1  | 0.656144456  | 1.28E-10    | 3.00E-09    | 2.26692331   | 0         | 0         |
| TROAP    | 0.656024017  | 1.51E-10    | 3.51E-09    | 1.843016427  | 8.26E-155 | 1.77E-150 |
| JRK      | 0.64263426   | 7.70E-07    | 9.93E-06    | 0.327524911  | 6.31E-82  | 1.35E-77  |
| CENPA    | 0.627684945  | 1.30E-10    | 3.03E-09    | 2.574646706  | 4.29E-208 | 9.16E-204 |
| GREB1    | -0.622104585 | 0.000203895 | 0.001485424 | -3.846689194 | 1.17E-34  | 2.50E-30  |
| SLC19A2  | -0.622103449 | 1.39E-05    | 0.000135949 | -0.781931884 | 3.45E-15  | 7.36E-11  |
| CIT      | 0.621635482  | 4.81E-06    | 5.20E-05    | 1.730693483  | 3.64E-91  | 7.77E-87  |
| CDC25C   | 0.61914164   | 1.45E-07    | 2.15E-06    | 2.273983231  | 1.07E-69  | 2.29E-65  |
| CEP55    | 0.61891591   | 7.99E-10    | 1.70E-08    | 2.99652056   | 2.40E-286 | 5.12E-282 |
| TGFBR2   | 0.614885355  | 2.82E-06    | 3.20E-05    | 0.858625057  | 2.47E-136 | 5.28E-132 |
| KIF23    | 0.608477676  | 2.16E-10    | 4.90E-09    | 2.633037163  | 2.51E-257 | 5.36E-253 |
| SEC11C   | -0.604904372 | 2.73E-18    | 1.44E-16    | -0.282711963 | 6.27E-31  | 1.34E-26  |
| CMTM3    | 0.601618035  | 3.33E-05    | 0.00029999  | 2.666021342  | 8.66E-216 | 1.85E-211 |
| ETV3     | -0.597943348 | 1.95E-10    | 4.45E-09    | -0.305821616 | 1.50E-10  | 3.21E-06  |
| MEIS1    | 0.591076159  | 0.002468684 | 0.012830194 | 2.254435529  | 5.81E-195 | 1.24E-190 |
| CDC20    | 0.585297207  | 2.64E-13    | 8.98E-12    | 1.801284022  | 3.30E-211 | 7.04E-207 |
| ARL6     | 0.572340188  | 0.000597983 | 0.003818315 | 1.161102838  | 1.63E-83  | 3.47E-79  |
| EME1     | 0.562021264  | 0.000920448 | 0.005540283 | 1.424905039  | 2.43E-41  | 5.19E-37  |
| CORO7    | -0.554934338 | 2.52E-06    | 2.90E-05    | -0.57024629  | 1.58E-61  | 3.38E-57  |
| CRIP1    | 0.553843592  | 4.52E-08    | 7.29E-07    | 0.912976198  | 9.15E-53  | 1.95E-48  |
| VEGFA    | -0.551890662 | 2.73E-09    | 5.37E-08    | -1.375142619 | 7.90E-239 | 1.69E-234 |
| AURKA    | 0.546799724  | 3.56E-12    | 1.05E-10    | 1.830316785  | 8.41E-112 | 1.80E-107 |
| XYLT1    | -0.542372485 | 7.04E-09    | 1.28E-07    | -0.829050799 | 1.64E-55  | 3.51E-51  |
| MAP1LC3B | -0.541862879 | 1.37E-13    | 4.82E-12    | -0.696358405 | 1.27E-210 | 2.72E-206 |
| NAGK     | 0.535433334  | 1.74E-08    | 2.98E-07    | 0.598672697  | 1.93E-57  | 4.13E-53  |
| PHF19    | 0.534278073  | 6.22E-09    | 1.15E-07    | 1.882016652  | 0         | 0         |
| TBC1D32  | -0.515205856 | 0.0150284   | 0.056379289 | -1.544213089 | 2.93E-21  | 6.25E-17  |
| CCNB2    | 0.514177353  | 1.48E-11    | 4.06E-10    | 3.152638657  | 0         | 0         |
| JUND     | -0.512268692 | 0.006708739 | 0.029396565 | -0.936465279 | 0         | 0         |
| VASH2    | 0.5100522    | 0.020944239 | 0.073657877 | 2.375007384  | 1.32E-149 | 2.82E-145 |
| ARNTL2   | 0.502610453  | 3.60E-06    | 4.00E-05    | 4.050272217  | 5.54E-136 | 1.18E-131 |
| OSGEPL1  | 0.497625445  | 0.000438295 | 0.002911377 | 0.402617489  | 2.20E-19  | 4.70E-15  |
| MACF1    | 0.487239357  | 0.000300419 | 0.002087625 | 0.750819688  | 0         | 0         |
| RGS1     | -0.484451017 | 1.85E-07    | 2.68E-06    | -0.662425942 | 2.31E-254 | 4.94E-250 |
| ZMYND8   | 0.480430221  | 1.31E-05    | 0.000129485 | 0.294818578  | 9.72E-198 | 2.08E-193 |
| HEXIM1   | -0.477313461 | 1.20E-08    | 2.11E-07    | -0.866525515 | 2.40E-57  | 5.13E-53  |
| SQOR     | 0.477265285  | 3.87E-06    | 4.26E-05    | 0.482535942  | 2.03E-108 | 4.33E-104 |
| TSTD1    | -0.47385841  | 1.66E-05    | 0.000161008 | -1.012818196 | 0         | 0         |
| RACGAP1  | 0.470076335  | 9.65E-12    | 2.71E-10    | 2.366925087  | 3.85E-228 | 8.21E-224 |
| TPX2     | 0.467952944  | 9.02E-10    | 1.90E-08    | 2.306901266  | 0         | 0         |
| CENPI    | 0.467002156  | 0.001257423 | 0.007198012 | 1.477204705  | 2.10E-31  | 4.48E-27  |
| CCDC15   | 0.464602618  | 0.020901338 | 0.073566764 | 1.981154596  | 1.43E-111 | 3.06E-107 |
| GIT2     | 0.463346889  | 1.25E-06    | 1.54E-05    | 0.319963046  | 9.80E-116 | 2.09E-111 |
| MKI67    | 0.462703474  | 0.002180736 | 0.011562709 | 2.464828436  | 0         | 0         |
| ZNF180   | 0.461260029  | 0.000283009 | 0.001977753 | 0.327097717  | 3.43E-27  | 7.33E-23  |
| BRMS1L   | 0.454979153  | 0.003209042 | 0.015991648 | 0.637418469  | 2.42E-86  | 5.17E-82  |
| STN1     | 0.45492312   | 0.000132997 | 0.001019979 | 0.545315138  | 1.27E-106 | 2.70E-102 |
| RIOX2    | 0.453646629  | 9.82E-09    | 1.76E-07    | 0.596333944  | 5.11E-220 | 1.09E-215 |
| WDSUB1   | 0.448723939  | 0.009579949 | 0.039367816 | 0.933224082  | 4.70E-90  | 1.00E-85  |
| ZNF714   | 0.446765847  | 0.001144126 | 0.006671182 | 1.809726182  | 1.37E-262 | 2.92E-258 |
| STX11    | -0.444802272 | 2.68E-05    | 0.000246954 | -0.448804856 | 2.45E-43  | 5.23E-39  |



|          |              |             |             |              |                       |                       |
|----------|--------------|-------------|-------------|--------------|-----------------------|-----------------------|
| EIF4E    | -0.442199199 | 3.32E-05    | 0.000298648 | -1.042966335 | 9.07E-107             | 1.94E-102             |
| MIDN     | -0.439829893 | 1.59E-05    | 0.000154455 | -0.498446679 | 7.16E-57              | 1.53E-52              |
| GPAT3    | -0.434772025 | 0.020644866 | 0.072767584 | -0.793274484 | 6.86E-81              | 1.47E-76              |
| TEDC1    | 0.434223646  | 0.00393242  | 0.018837541 | 1.700586771  | 1.64E-235             | 3.50E-231             |
| CDCA8    | 0.433620259  | 2.33E-07    | 3.32E-06    | 2.308397527  | 1.35E-260             | 2.88E-256             |
| ELAC1    | 0.430037574  | 0.002971358 | 0.01494916  | 0.272302714  | 1.62E-47              | 3.46E-43              |
| KIF4A    | 0.428269513  | 2.85E-06    | 3.24E-05    | 2.247209078  | 1.72E-176             | 3.68E-172             |
| CHMP5    | 0.424937293  | 5.39E-05    | 0.000460496 | 0.45573438   | 2.16E-120             | 4.61E-116             |
| HOXB7    | 0.418823182  | 0.001094795 | 0.006426632 | 0.353872048  | 9.32E-27              | 1.99E-22              |
| PTTG1    | 0.417350544  | 1.27E-06    | 1.56E-05    | 2.500333653  | 0                     | 0                     |
| ETHE1    | 0.416450449  | 0.000767482 | 0.004744905 | 0.419572451  | 6.43E-74              | 1.37E-69              |
| ZNF134   | 0.414121926  | 0.000935402 | 0.00561468  | 0.402773464  | 1.93E-21              | 4.11E-17              |
| PRC1     | 0.414110837  | 6.14E-08    | 9.63E-07    | 2.104210214  | 0                     | 0                     |
| SLC25A37 | -0.413725944 | 0.00018463  | 0.00136285  | -0.327788771 | 5.00E-108             | 1.07E-103             |
| CBX4     | -0.413430778 | 2.12E-06    | 2.49E-05    | -0.679626279 | 2.50E-92              | 5.34E-88              |
| PDK1     | -0.411770497 | 2.34E-06    | 2.72E-05    | -0.699909145 | 9.86E-198             | 2.11E-193             |
| TENT5C   | -0.397063071 | 1.98E-06    | 2.34E-05    | -1.662438698 | 0                     | 0                     |
| SRRM2    | -0.394769447 | 0.000193175 | 0.001416861 | -0.425819357 | 0                     | 0                     |
| ARPC1A   | 0.391515792  | 9.36E-07    | 1.19E-05    | 0.521717641  | 2.22E-187             | 4.74E-183             |
| SGO2     | 0.391095057  | 0.001714773 | 0.009430053 | 1.94729937   | 7.30723090199204e-321 | 1.56060530373844e-316 |
| ZNF93    | 0.381434601  | 0.001978305 | 0.010642529 | 1.070284684  | 1.84E-70              | 3.92E-66              |
| GPR132   | 0.381352794  | 0.002357497 | 0.012341223 | 3.863545301  | 3.30E-236             | 7.05E-232             |
| GOLM1    | 0.380741924  | 8.55E-07    | 1.09E-05    | 0.278935764  | 9.14E-68              | 1.95E-63              |
| ANKRD33B | -0.378782991 | 3.80E-07    | 5.20E-06    | -0.642996765 | 7.47E-12              | 1.60E-07              |
| TPT1     | -0.378352856 | 2.27E-10    | 5.14E-09    | -0.614602609 | 0                     | 0                     |
| RNF14    | 0.377235316  | 2.04E-05    | 0.000192793 | 0.276632426  | 2.24E-100             | 4.78E-96              |
| ALCAM    | 0.376616895  | 0.011396864 | 0.045276325 | 0.887967955  | 1.33E-274             | 2.84E-270             |
| EXO5     | 0.374128825  | 0.009030158 | 0.037401398 | 0.731354046  | 3.82E-12              | 8.15E-08              |
| APOBEC3B | 0.368122802  | 1.38E-06    | 1.69E-05    | 3.611632696  | 0                     | 0                     |
| HSP90AA1 | -0.367916983 | 3.14E-08    | 5.19E-07    | -0.357998727 | 1.11E-297             | 2.36E-293             |
| DLGAP5   | 0.366829943  | 6.95E-05    | 0.000576898 | 2.096493     | 7.27E-268             | 1.55E-263             |
| KLF3     | -0.366697516 | 0.000835104 | 0.005090286 | -1.932565569 | 0                     | 0                     |
| RHOG     | 0.365462345  | 0.000301523 | 0.002093284 | 0.646200003  | 3.29E-23              | 7.03E-19              |
| CDKL5    | 0.362462114  | 0.015360595 | 0.057376926 | 0.287491575  | 1.23E-33              | 2.62E-29              |
| ARG2     | 0.355901164  | 0.023127158 | 0.079763593 | 0.756989677  | 3.05E-50              | 6.52E-46              |
| ZNF791   | 0.354580562  | 0.000841774 | 0.005123725 | 0.85764303   | 0                     | 0                     |
| JTB      | -0.349729346 | 0.000658296 | 0.004148219 | -0.436865905 | 0                     | 0                     |
| LPIN1    | 0.348633932  | 5.05E-07    | 6.76E-06    | 1.009935629  | 0                     | 0                     |
| BUB1     | 0.343921298  | 1.27E-06    | 1.56E-05    | 1.917431182  | 4.15015142506647e-322 | 8.86347839851446e-318 |
| TTK      | 0.34328982   | 0.000467039 | 0.003078686 | 2.732618224  | 1.07E-281             | 2.28E-277             |
| RALB     | 0.342802664  | 2.68E-05    | 0.000246954 | 1.591530575  | 8.82E-148             | 1.88E-143             |
| HYLS1    | 0.337947284  | 0.002786263 | 0.014199444 | 0.62062617   | 7.40E-40              | 1.58E-35              |
| FOXM1    | 0.335734724  | 0.000102612 | 0.000814735 | 1.423635826  | 1.25E-96              | 2.67E-92              |
| NCAPH    | 0.333832139  | 1.17E-05    | 0.000117438 | 2.813927719  | 2.00E-227             | 4.26E-223             |
| EMSY     | 0.330199227  | 0.001804638 | 0.00983971  | 0.48464859   | 2.73E-70              | 5.84E-66              |
| SPAG5    | 0.32517188   | 2.19E-05    | 0.000205826 | 1.289127444  | 1.83E-128             | 3.91E-124             |
| DDIAS    | 0.324757887  | 0.001178807 | 0.00683408  | 2.186745893  | 2.47E-212             | 5.26E-208             |
| MTFR2    | 0.323506493  | 0.004124897 | 0.019618469 | 1.857583693  | 7.91E-109             | 1.69E-104             |
| METTL18  | -0.319966812 | 0.005512276 | 0.024995045 | -0.642456422 | 9.50E-14              | 2.03E-09              |
| CASP6    | 0.319613147  | 0.009916424 | 0.040519754 | 0.495766672  | 8.30E-66              | 1.77E-61              |
| MED27    | 0.314697751  | 0.000437149 | 0.002904878 | 0.26699022   | 3.28E-52              | 7.02E-48              |
| JMY      | -0.314115238 | 0.006953491 | 0.030315611 | -0.310570747 | 5.01E-170             | 1.07E-165             |
| STRADB   | -0.312774864 | 0.00098373  | 0.005862094 | -0.509866809 | 1.50E-15              | 3.21E-11              |
| NSL1     | 0.312513973  | 0.009173042 | 0.037899473 | 0.282201765  | 2.06E-64              | 4.40E-60              |
| BIRC5    | 0.311541599  | 1.18E-05    | 0.000117636 | 2.55268575   | 0                     | 0                     |
| MAN1A1   | -0.31052835  | 0.006275008 | 0.027812723 | -0.315836679 | 5.42E-306             | 1.16E-301             |
| ZNF17    | 0.309776249  | 0.029938562 | 0.097595768 | 0.564620071  | 3.58E-30              | 7.64E-26              |
| PRR11    | 0.309754603  | 0.001580484 | 0.008794741 | 2.775994029  | 3.50786608547285e-322 | 7.49174959874437e-318 |
| FUT8     | 0.309004503  | 0.000343451 | 0.002345243 | 0.381302474  | 7.03E-286             | 1.50E-281             |
| NCKAP1   | -0.308309044 | 0.007952029 | 0.033751295 | -2.983578268 | 1.07E-130             | 2.29E-126             |
| RIN3     | 0.308290756  | 0.022654692 | 0.078588001 | 0.327095043  | 5.16E-149             | 1.10E-144             |
| TMSB4X   | 0.305714011  | 1.51E-06    | 1.82E-05    | 0.90976914   | 0                     | 0                     |

|          |              |             |             |              |           |             |
|----------|--------------|-------------|-------------|--------------|-----------|-------------|
| NCAPG    | 0.304415572  | 3.22E-05    | 0.000291244 | 2.607586159  | 0         | 0           |
| ZMYM2    | -0.304338715 | 0.000234687 | 0.001684938 | -0.411732024 | 7.94E-76  | 1.70E-71    |
| CCNB1    | 0.301569878  | 9.08E-06    | 9.21E-05    | 2.61060301   | 0         | 0           |
| ENTPD6   | -0.300724841 | 0.000300288 | 0.00208755  | -1.213946453 | 5.88E-56  | 1.26E-51    |
| ACTL6A   | 0.298518189  | 0.000146091 | 0.00110813  | 0.533480612  | 5.80E-177 | 1.24E-172   |
| NSMF     | 0.297343919  | 0.001894769 | 0.010260075 | 0.479244766  | 7.69E-55  | 1.64E-50    |
| NLRP2    | 0.296355898  | 0.000340426 | 0.00232826  | 3.920228433  | 0         | 0           |
| TUBA1B   | 0.293313742  | 4.12E-05    | 0.000361345 | 0.659132995  | 1.44E-37  | 3.08E-33    |
| PTCH1    | 0.293136326  | 0.017614674 | 0.064082628 | 1.288135132  | 0         | 0           |
| CCDC91   | 0.290790759  | 0.014511637 | 0.054904527 | 0.771219411  | 0         | 0           |
| ARHGAP5  | -0.287504268 | 0.02239066  | 0.077890532 | -0.81009234  | 2.58E-86  | 5.51E-82    |
| BUB1B    | 0.28705549   | 0.003962253 | 0.018943769 | 2.357876507  | 1.17E-262 | 2.50E-258   |
| SGO1     | 0.284726991  | 0.004289361 | 0.020261554 | 2.880703864  | 0         | 0           |
| HSPH1    | -0.274730628 | 0.001108422 | 0.006495618 | -0.251252973 | 7.93E-57  | 1.69E-52    |
| RNF5     | 0.266341623  | 0.003266351 | 0.016202634 | 0.27609703   | 4.79E-73  | 1.02E-68    |
| USP39    | 0.26558725   | 5.84E-05    | 0.000493937 | 1.139177362  | 7.03E-157 | 1.50E-152   |
| P4HA2    | 0.263847138  | 0.011661615 | 0.046019961 | 0.778969351  | 4.35E-74  | 9.29E-70    |
| KBTBD8   | -0.262196419 | 0.027512023 | 0.091409381 | -0.711424894 | 8.79E-13  | 1.88E-08    |
| WASHC3   | 0.260407411  | 0.008478035 | 0.03553101  | 0.550864685  | 8.40E-195 | 1.79E-190   |
| MYOF     | 0.259920463  | 0.005430387 | 0.024697741 | 1.207492075  | 2.19E-08  | 0.000467756 |
| SNAPC5   | 0.257748633  | 0.006397451 | 0.028273287 | 0.761781951  | 6.07E-237 | 1.30E-232   |
| EXOSC3   | 0.257279666  | 0.00727752  | 0.031459015 | 1.044028548  | 4.73E-208 | 1.01E-203   |
| SDHAF2   | 0.254570309  | 0.002611156 | 0.013417624 | 0.500581406  | 1.77E-67  | 3.78E-63    |
| SPC25    | 0.254441262  | 0.009785905 | 0.04009998  | 2.747418046  | 2.10E-257 | 4.49E-253   |
| IFIH1    | 0.253871657  | 0.016514265 | 0.060687424 | 0.698713062  | 1.88E-274 | 4.02E-270   |
| NFE2L2   | -0.251527028 | 0.002278918 | 0.011991501 | -0.603293418 | 1.63E-76  | 3.49E-72    |
| GAS7     | 0.250099621  | 0.00325972  | 0.016188289 | 1.978198128  | 2.22E-09  | 4.74E-05    |
| PRIM1    | 0.249262553  | 0.009556732 | 0.039291056 | 0.875228541  | 4.88E-141 | 1.04E-136   |
| MEPCE    | -0.249173538 | 0.002375001 | 0.012421591 | -0.625079018 | 2.94E-62  | 6.29E-58    |
| TTC5     | 0.248592721  | 0.01045089  | 0.042294476 | 0.402173406  | 2.84E-95  | 6.06E-91    |
| INSR     | -0.247845775 | 0.004358914 | 0.020528508 | -0.853305693 | 1.55E-231 | 3.31E-227   |
| GTF2H3   | 0.246339037  | 0.013902641 | 0.053193116 | 0.666595546  | 2.67E-90  | 5.70E-86    |
| NDUFB5   | 0.245908567  | 0.002211072 | 0.011687969 | 0.556154812  | 2.94E-287 | 6.29E-283   |
| PBX2     | -0.243117474 | 0.007493138 | 0.03218221  | -1.136396052 | 3.17E-98  | 6.77E-94    |
| PTTG1IP  | 0.241155183  | 0.002284746 | 0.012011214 | 1.202318621  | 0         | 0           |
| DDX24    | -0.240351556 | 0.000227906 | 0.001642383 | -0.889866647 | 0         | 0           |
| TXNDC11  | -0.239531627 | 0.00050235  | 0.003277765 | -0.331871414 | 2.04E-218 | 4.36E-214   |
| SSR4     | -0.238053967 | 0.009373475 | 0.038629336 | -2.131363247 | 0         | 0           |
| RANBP6   | -0.23393794  | 0.012356138 | 0.048235176 | -0.656105866 | 1.69E-73  | 3.60E-69    |
| ASF1B    | 0.232256177  | 0.00844934  | 0.035427898 | 1.688010041  | 1.06E-235 | 2.26E-231   |
| LMO4     | -0.231669222 | 0.010069548 | 0.04101961  | -0.562456796 | 1.94E-264 | 4.13E-260   |
| SPECC1   | 0.231445371  | 0.01892537  | 0.067768949 | 0.874966473  | 5.54E-41  | 1.18E-36    |
| ZWINT    | 0.227968318  | 0.001364664 | 0.00773548  | 2.132863684  | 0         | 0           |
| ITPR1    | 0.227551185  | 0.014906853 | 0.056020393 | 0.832081696  | 6.99E-152 | 1.49E-147   |
| TUBB     | 0.22712492   | 0.000287719 | 0.002008231 | 0.590637256  | 1.18E-38  | 2.51E-34    |
| TSPAN3   | -0.224443321 | 0.001116623 | 0.006539248 | -0.743451786 | 5.30E-134 | 1.13E-129   |
| ANXA6    | 0.223451314  | 0.000471381 | 0.003097875 | 0.764570228  | 0         | 0           |
| HSD17B11 | -0.223443487 | 0.025196247 | 0.085369481 | -0.866617083 | 1.46E-167 | 3.12E-163   |
| CDK1     | 0.221058338  | 0.024263013 | 0.082855965 | 2.072129767  | 3.75E-197 | 8.00E-193   |
| DCAF7    | 0.220324438  | 0.000771054 | 0.004760191 | 0.883927117  | 9.88E-263 | 2.11E-258   |
| INO80E   | -0.217864732 | 0.022785739 | 0.078900348 | -0.342401562 | 2.98E-39  | 6.36E-35    |
| NGRN     | 0.211494595  | 0.005076691 | 0.023378866 | 1.090138273  | 2.67E-180 | 5.69E-176   |
| APEX2    | 0.209738552  | 0.016065311 | 0.059450865 | 0.381735332  | 1.84E-32  | 3.92E-28    |
| KBTBD4   | 0.208440106  | 0.017647614 | 0.064188979 | 0.449059821  | 1.25E-72  | 2.67E-68    |
| HAUS1    | 0.202533534  | 0.013770466 | 0.05278069  | 0.645570633  | 3.41E-220 | 7.28E-216   |
| ADAR     | -0.202339863 | 0.000865901 | 0.005246606 | -0.533070596 | 5.09E-221 | 1.09E-216   |
| BUB3     | 0.201486562  | 0.002520603 | 0.013056917 | 1.18576582   | 0         | 0           |
| CSTF2    | 0.191048003  | 0.024832215 | 0.084439314 | 0.627544306  | 1.68E-27  | 3.59E-23    |
| COX6B1   | 0.18049419   | 0.005142481 | 0.023640121 | 0.436265576  | 6.40E-273 | 1.37E-268   |
| EXOSC8   | 0.179549176  | 0.027847498 | 0.092364514 | 0.639852845  | 8.22E-192 | 1.76E-187   |
| ANP32A   | 0.173858091  | 0.025269963 | 0.085602494 | 0.80148512   | 0         | 0           |
| EEF1D    | -0.169289462 | 0.018986792 | 0.067946739 | -0.52823342  | 0         | 0           |

|        |             |             |             |              |           |           |
|--------|-------------|-------------|-------------|--------------|-----------|-----------|
| NUDC   | 0.166989933 | 0.01596413  | 0.059159178 | 0.393537926  | 8.76E-188 | 1.87E-183 |
| AKAP13 | 0.166160744 | 0.029320553 | 0.096090844 | 0.461951287  | 4.26E-306 | 9.11E-302 |
| SUN1   | -0.16420987 | 0.01697033  | 0.062116932 | -0.764122276 | 4.47E-93  | 9.54E-89  |
| PSMC5  | 0.154327961 | 0.016424139 | 0.060449906 | 0.610395344  | 5.77E-302 | 1.23E-297 |

**Supplementary Table S4**

| <b>Cell line</b>             | <b>Melflufen</b>                      |                                       | <b>Melphalan</b>                      |                                       |
|------------------------------|---------------------------------------|---------------------------------------|---------------------------------------|---------------------------------------|
|                              | <b>EC50, <math>\mu\text{M}</math></b> | <b>EC90, <math>\mu\text{M}</math></b> | <b>EC50, <math>\mu\text{M}</math></b> | <b>EC90, <math>\mu\text{M}</math></b> |
| <b>AMO-1 <i>TP53</i> wt</b>  | <b>0.1</b>                            | <b>0.5</b>                            | <b>9.0</b>                            | <b><math>\geq 20</math></b>           |
| <b>AMO-1 <i>TP53</i> -/-</b> | <b>0.6</b>                            | <b>2.5</b>                            | <b><math>\geq 20</math></b>           | <b><math>\geq 20</math></b>           |

Cell lines were treated with either melflufen or melphalan at an 8-point drug concentration range to determine EC50 or EC90 values using a viability

# Supplementary Table S5

## Baseline demographics

|                                           | Mel - del17p, N=33 | Mel - Not del17p, N=213 | Pom - del17p, N=37 | Pom - Not del17p, N=212 |
|-------------------------------------------|--------------------|-------------------------|--------------------|-------------------------|
| <b>Age</b>                                | 68 (45-85)         | 67 (41-91)              | 69 (43-83)         | 68 (39-87)              |
| <b>Agegroup</b>                           |                    |                         |                    |                         |
| <65                                       | 11 (33.3)          | 85 (39.9)               | 11 (29.7)          | 74 (34.9)               |
| 65-74                                     | 19 (57.6)          | 94 (44.1)               | 19 (51.4)          | 106 (50.0)              |
| 75+                                       | 3 (9.1)            | 34 (16.0)               | 7 (18.9)           | 32 (15.1)               |
| <b>Male</b>                               | 20 (61)            | 119 (56)                | 19 (51)            | 121 (57)                |
| <b>Race</b>                               |                    |                         |                    |                         |
| WHITE                                     | 30 (90.9)          | 194 (91.1)              | 32 (86.5)          | 190 (89.6)              |
| BLACK OR AFRICAN AMERICAN                 | 0 (0.0)            | 4 (1.9)                 | 0 (0.0)            | 4 (1.9)                 |
| ASIAN                                     | 1 (3.0)            | 7 (3.3)                 | 5 (13.5)           | 8 (3.8)                 |
| NATIVE HAWAIIAN OR OTHER PACIFIC ISLANDER | 0 (0.0)            | 0 (0.0)                 | 0 (0.0)            | 0 (0.0)                 |
| OTHER                                     | 0 (0.0)            | 1 (0.5)                 | 0 (0.0)            | 0 (0.0)                 |
| NOT REPORTED                              | 0 (0.0)            | 0 (0.0)                 | 0 (0.0)            | 1 (0.5)                 |
| UNKNOWN                                   | 2 (6.1)            | 7 (3.3)                 | 0 (0.0)            | 9 (4.2)                 |

## Disease characteristics

|                                                       | Mel - del17p, N=33 | Mel - Not del17p, N=213 | Pom - del17p, N=37 | Pom - Not del17p, N=212 |
|-------------------------------------------------------|--------------------|-------------------------|--------------------|-------------------------|
| <b>Years from diagnosis, median (range)</b>           | 4.5 (1.5-21.5)     | 3.9 (0.5-26.3)          | 3.8 (1.2-12.5)     | 3.9 (0.4-25.2)          |
| <b>Prior treatment regimens, median (range)</b>       | 3 (2-4)            | 3 (2-4)                 | 2 (2-4)            | 3 (2-4)                 |
| <b>Documented refractory status, n(%)</b>             |                    |                         |                    |                         |
| Lenalidomide                                          | 33 (100)           | 213 (100)               | 37 (100)           | 212 (100)               |
| Pomalidomide                                          | 0 (0)              | 0 (0)                   | 0 (0)              | 0 (0)                   |
| Bortezomib                                            | 15 (45)            | 96 (45)                 | 22 (59)            | 103 (49)                |
| Carfilzomib                                           | 9 (27)             | 38 (18)                 | 9 (24)             | 28 (13)                 |
| Daratumumab                                           | 3 (9)              | 45 (21)                 | 7 (19)             | 31 (15)                 |
| <b>Alkylator refractory, n(%)</b>                     | 8 (24)             | 70 (33)                 | 9 (24)             | 66 (31)                 |
| Melphalan exposed                                     | 11 (33)            | 50 (23)                 | 17 (46)            | 47 (22)                 |
| Melphalan refractory                                  | 2 (6)              | 13 (6)                  | 4 (11)             | 19 (9)                  |
| <b>Previous stem cell transplant, n(%)</b>            | 19 (58)            | 106 (50)                | 15 (41)            | 105 (50)                |
| <b>International Staging System at Baseline, n(%)</b> |                    |                         |                    |                         |
| I                                                     | 10 (30)            | 109 (51)                | 14 (38)            | 110 (52)                |
| II                                                    | 19 (58)            | 75 (35)                 | 18 (49)            | 76 (36)                 |
| III                                                   | 4 (12)             | 29 (14)                 | 5 (14)             | 26 (12)                 |
| <b>High-risk cytogenetics, n(%)</b>                   | 32 (97)            | 51 (24)                 | 33 (89)            | 53 (25)                 |
| <b>Extramedullary disease (EMD), n(%)</b>             | 2 (6)              | 28 (13)                 | 4 (11)             | 22 (10)                 |
| <b>ECOG at baseline, n(%)</b>                         |                    |                         |                    |                         |
| 0                                                     | 9 (27)             | 81 (38)                 | 11 (30)            | 81 (38)                 |
| 1                                                     | 17 (52)            | 113 (53)                | 22 (59)            | 114 (54)                |
| 2                                                     | 7 (21)             | 19 (9)                  | 4 (11)             | 17 (8)                  |
| <b>TTP following ASCT</b>                             |                    |                         |                    |                         |
| No transplant                                         | 14 (42)            | 107 (50)                | 22 (59)            | 107 (50)                |
| <1y                                                   | 4 (12)             | 27 (13)                 | 6 (16)             | 26 (12)                 |
| 1-2y                                                  | 8 (24)             | 39 (18)                 | 4 (11)             | 47 (22)                 |
| 2-3y                                                  | 4 (12)             | 19 (9)                  | 1 (3)              | 17 (8)                  |
| >3y                                                   | 3 (9)              | 21 (10)                 | 4 (11)             | 15 (7)                  |

# Supplementary Table S6

|        |                | del(17p)                            | del(17p); t(4:14)  | del(17p); t(14:16) | del(17p); t(4:14); t(14:16) | del(17p); t(14:20) | del(17p); gain 1q (+1q)     | del(17p); t(4;14); gain 1q (+1q) | del(17p); t(4;16); gain 1q (+1q) |
|--------|----------------|-------------------------------------|--------------------|--------------------|-----------------------------|--------------------|-----------------------------|----------------------------------|----------------------------------|
| MflDex | responders     | 8 (2 (VGPR), 6 (PR))                | 1 (VGPR)           | 0                  | 0                           | 0                  | 2 (1 (VGPR), 1 (PR))        | 0                                | 0                                |
|        | non-responders | 8(2 (SD), 1 (PD), 1 (NE), 4 (MR))   | 0                  | 0                  | 0                           | 0                  | 10 (5 (SD), 3 (PD), 2 (MR)) | 1 (SD)                           | 0                                |
|        | non -treated   | 1 (NE)                              | 0                  | 0                  | 0                           | 0                  | 2 (NE)                      | 0                                | 0                                |
| PomDex | responders     | 2 (VGPR)                            | 0                  | 0                  | 0                           | 0                  | 2 (1 (VGPR), 1 (PR))        | 0                                | 0                                |
|        | non-responders | 17 (5 (SD), 8 (PD), 2 (MR), 2 (NE)) | 4 (2 (SD), 2 (MR)) | 0                  | 3 (SD)                      | 1 (PD)             | 5 (2 (SD), 3 (PD))          | 1 (NE)                           | 1 (PD)                           |
|        | non -treated   | 0                                   | 1 (PD)             | 0                  | 0                           | 0                  | 0                           | 0                                | 0                                |

# Supplementary Table S7

## Baseline demographics

|                                           | Melflufen - TP53 | Melflufen - TP53 | Pomalidomide - TP53 | Pomalidomide - TP53 |
|-------------------------------------------|------------------|------------------|---------------------|---------------------|
|                                           | mutant, N=15     | wild type , N=62 | mutant, N=18        | wild type, N=50     |
| <b>Age</b>                                | 66 (51-80)       | 65 (41-84)       | 68 (43-83)          | 68 (46-80)          |
| <b>Agegroup</b>                           |                  |                  |                     |                     |
| <65                                       | 6 (40.0)         | 28 (45.2)        | 6 (33.3)            | 14 (28.0)           |
| 65-74                                     | 8 (53.3)         | 27 (43.5)        | 9 (50.0)            | 27 (54.0)           |
| 75+                                       | 1 (6.7)          | 7 (11.3)         | 3 (16.7)            | 9 (18.0)            |
| <b>Male</b>                               | 6 (40)           | 32 (52)          | 9 (50)              | 25 (50)             |
| <b>Race</b>                               |                  |                  |                     |                     |
| WHITE                                     | 15 (100.0)       | 55 (88.7)        | 15 (83.3)           | 44 (88.0)           |
| BLACK OR AFRICAN AMERICAN                 | 0 (0.0)          | 0 (0.0)          | 1 (5.6)             | 1 (2.0)             |
| ASIAN                                     | 0 (0.0)          | 4 (6.5)          | 2 (11.1)            | 3 (6.0)             |
| NATIVE HAWAIIAN OR OTHER PACIFIC ISLANDER | 0 (0.0)          | 0 (0.0)          | 0 (0.0)             | 0 (0.0)             |
| OTHER                                     | 0 (0.0)          | 1 (1.6)          | 0 (0.0)             | 0 (0.0)             |
| NOT REPORTED                              | 0 (0.0)          | 0 (0.0)          | 0 (0.0)             | 0 (0.0)             |
| UNKNOWN                                   | 0 (0.0)          | 2 (3.2)          | 0 (0.0)             | 2 (4.0)             |

## Disease characteristics

|                                                       | Melflufen - TP53 | Melflufen - TP53 | Pomalidomide - TP53 | Pomalidomide - TP53 |
|-------------------------------------------------------|------------------|------------------|---------------------|---------------------|
|                                                       | mutant, N=15     | wild type , N=62 | mutant, N=18        | wild type, N=50     |
| <b>Years from diagnosis, median (range)</b>           | 4.5 (1.5-8.4)    | 4.6 (0.5-17.8)   | 4.3 (1.2-12.5)      | 4.4 (0.4-13.7)      |
| <b>Prior treatment regimens, median (range)</b>       | 3 (2-4)          | 3 (2-4)          | 3 (2-4)             | 3 (2-4)             |
| <b>Documented refractory status, n(%)</b>             |                  |                  |                     |                     |
| Lenalidomide                                          | 15 (100)         | 62 (100)         | 18 (100)            | 50 (100)            |
| Pomalidomide                                          | 0 (0)            | 0 (0)            | 0 (0)               | 0 (0)               |
| Bortezomib                                            | 11 (73)          | 30 (48)          | 10 (56)             | 22 (44)             |
| Carfilzomib                                           | 0 (0)            | 6 (10)           | 3 (17)              | 7 (14)              |
| Daratumumab                                           | 1 (7)            | 14 (23)          | 2 (11)              | 7 (14)              |
| <b>Alkylator refractory, n(%)</b>                     | 6 (40)           | 25 (40)          | 6 (33)              | 8 (16)              |
| Melphalan exposed                                     | 5 (33)           | 11 (18)          | 7 (39)              | 15 (30)             |
| Melphalan refractory                                  | 2 (13)           | 5 (8)            | 2 (11)              | 3 (6)               |
| <b>Previous stem cell transplant, n(%)</b>            | 9 (60)           | 33 (53)          | 10 (56)             | 29 (58)             |
| <b>International Staging System at Baseline, n(%)</b> |                  |                  |                     |                     |
| I                                                     | 6 (40)           | 37 (60)          | 4 (22)              | 31 (62)             |
| II                                                    | 7 (47)           | 18 (29)          | 13 (72)             | 15 (30)             |
| III                                                   | 2 (13)           | 7 (11)           | 1 (6)               | 4 (8)               |
| <b>High-risk cytogenetics, n(%)</b>                   | 13 (87)          | 16 (26)          | 14 (78)             | 18 (36)             |
| <b>Extramedullary disease (EMD), n(%)</b>             | 1 (7)            | 14 (23)          | 2 (11)              | 4 (8)               |
| <b>ECOG at baseline, n(%)</b>                         |                  |                  |                     |                     |
| 0                                                     | 6 (40)           | 21 (34)          | 4 (22)              | 20 (40)             |
| 1                                                     | 6 (40)           | 32 (52)          | 12 (67)             | 26 (52)             |
| 2                                                     | 3 (20)           | 9 (15)           | 2 (11)              | 4 (8)               |
| <b>TTP following ASCT</b>                             |                  |                  |                     |                     |
| No transplant                                         | 6 (40)           | 29 (47)          | 8 (44)              | 21 (42)             |
| <1y                                                   | 3 (20)           | 4 (6)            | 4 (22)              | 6 (12)              |
| 1-2y                                                  | 4 (27)           | 15 (24)          | 3 (17)              | 19 (38)             |
| 2-3y                                                  | 1 (7)            | 7 (11)           | 2 (11)              | 3 (6)               |
| >3y                                                   | 1 (7)            | 7 (11)           | 1 (6)               | 1 (2)               |
